# Supplementary material for: Signature of quantum interference effect in inter-layer Coulomb drag in graphene-based electronic double-layer systems
Source: Nat Commun. 2023 Mar 16;14:1465. doi: 10.1038/s41467-023-37197-2 (PMC10020572; doi:10.1038/s41467-023-37197-2)
Supplement: Supplementary file 2 — Source Data [file 41467_2023_37197_MOESM2_ESM.xlsx]

## Sheet: Fig1b
Vint (V)	VBG (V)	RT (Ω)
-5	-104.6	68.333
-5	-104.2	68.2798
-5	-103.8	68.2881
-5	-103.4	68.2918
-5	-103	68.3029
-5	-102.6	68.2631
-5	-102.2	68.2923
-5	-101.8	68.3173
-5	-101.4	68.3506
-5	-101	68.3238
-5	-100.6	68.333
-5	-100.2	68.2789
-5	-99.8	68.2853
-5	-99.4	68.2923
-5	-99	68.3256
-5	-98.6	68.2534
-5	-98.2	68.339
-5	-97.8	68.3103
-5	-97.4	68.2557
-5	-97	68.3395
-5	-96.6	68.3043
-5	-96.2	68.3066
-5	-95.8	68.2672
-5	-95.4	68.351
-5	-95	68.3088
-5	-94.6	68.332
-5	-94.2	68.344
-5	-93.8	68.3464
-5	-93.4	68.3408
-5	-93	68.3436
-5	-92.6	68.2488
-5	-92.2	68.334
-5	-91.8	68.3131
-5	-91.4	68.3404
-5	-91	68.2743
-5	-90.6	68.2646
-5	-90.2	68.3863
-5	-89.8	68.297
-5	-89.4	68.302
-5	-89	68.3261
-5	-88.6	68.3432
-5	-88.2	68.3103
-5	-87.8	68.3191
-5	-87.4	68.3103
-5	-87	68.283
-5	-86.6	68.2719
-5	-86.2	68.3228
-5	-85.8	68.3293
-5	-85.4	68.3242
-5	-85	68.2636
-5	-84.6	68.2446
-5	-84.2	68.3256
-5	-83.8	68.272
-5	-83.4	68.2654
-5	-83	68.339
-5	-82.6	68.3117
-5	-82.2	68.2104
-5	-81.8	68.2252
-5	-81.4	68.3029
-5	-81	68.2978
-5	-80.6	68.3057
-5	-80.2	68.326
-5	-79.8	68.2349
-5	-79.4	68.3261
-5	-79	68.2932
-5	-78.6	68.2465
-5	-78.2	68.4042
-5	-77.8	68.2816
-5	-77.4	68.3265
-5	-77	68.2367
-5	-76.6	68.2626
-5	-76.2	68.2343
-5	-75.8	68.2681
-5	-75.4	68.2858
-5	-75	68.3015
-5	-74.6	68.3381
-5	-74.2	68.2969
-5	-73.8	68.2756
-5	-73.4	68.3024
-5	-73	68.3418
-5	-72.6	68.2798
-5	-72.2	68.2789
-5	-71.8	68.2895
-5	-71.4	68.3006
-5	-71	68.2988
-5	-70.6	68.2113
-5	-70.2	68.2918
-5	-69.8	68.3075
-5	-69.4	68.2145
-5	-69	68.2839
-5	-68.6	68.3136
-5	-68.2	68.2895
-5	-67.8	68.2511
-5	-67.4	68.1914
-5	-67	68.2261
-5	-66.6	68.3039
-5	-66.2	68.2525
-5	-65.8	68.2289
-5	-65.4	68.2937
-5	-65	68.2876
-5	-64.6	68.3034
-5	-64.2	68.2779
-5	-63.8	68.3182
-5	-63.4	68.2196
-5	-63	68.2687
-5	-62.6	68.2303
-5	-62.2	68.2793
-5	-61.8	68.3103
-5	-61.4	68.2979
-5	-61	68.2511
-5	-60.6	68.2391
-5	-60.2	68.2488
-5	-59.8	68.2456
-5	-59.4	68.2682
-5	-59	68.2488
-5	-58.6	68.2446
-5	-58.2	68.2696
-5	-57.8	68.202
-5	-57.4	68.2196
-5	-57	68.2335
-5	-56.6	68.2552
-5	-56.2	68.203
-5	-55.8	68.221
-5	-55.4	68.1604
-5	-55	68.2228
-5	-54.6	68.2311
-5	-54.2	68.2668
-5	-53.8	68.2608
-5	-53.4	68.215
-5	-53	68.1719
-5	-52.6	68.2182
-5	-52.2	68.1988
-5	-51.8	68.2261
-5	-51.4	68.1692
-5	-51	68.179
-5	-50.6	68.197
-5	-50.2	68.2206
-5	-49.8	68.1975
-5	-49.4	68.247
-5	-49	68.2072
-5	-48.6	68.2535
-5	-48.2	68.2409
-5	-47.8	68.2011
-5	-47.4	68.1414
-5	-47	68.2089
-5	-46.6	68.2043
-5	-46.2	68.1312
-5	-45.8	68.1672
-5	-45.4	68.2015
-5	-45	68.1608
-5	-44.6	68.2265
-5	-44.2	68.1242
-5	-43.8	68.1363
-5	-43.4	68.1298
-5	-43	68.11
-5	-42.6	68.2007
-5	-42.2	68.1322
-5	-41.8	68.1396
-5	-41.4	68.1984
-5	-41	68.1239
-5	-40.6	68.1419
-5	-40.2	68.1507
-5	-39.8	68.1507
-5	-39.4	68.1359
-5	-39	68.1645
-5	-38.6	68.1562
-5	-38.2	68.1678
-5	-37.8	68.128
-5	-37.4	68.1021
-5	-37	68.146
-5	-36.6	68.191
-5	-36.2	68.1266
-5	-35.8	68.1336
-5	-35.4	68.0248
-5	-35	68.1461
-5	-34.6	68.0341
-5	-34.2	68.0568
-5	-33.8	68.0878
-5	-33.4	68.1197
-5	-33	68.0619
-5	-32.6	68.0993
-5	-32.2	68.1123
-5	-31.8	68.0812
-5	-31.4	67.9836
-5	-31	68.0854
-5	-30.6	68.2219
-5	-30.2	67.9734
-5	-29.8	68.0349
-5	-29.4	67.9765
-5	-29	67.9603
-5	-28.6	68.0714
-5	-28.2	68.0372
-5	-27.8	68.1696
-5	-27.4	68.0234
-5	-27	67.891
-5	-26.6	68.0479
-5	-26.2	68.1012
-5	-25.8	68.0007
-5	-25.4	68.0576
-5	-25	68.1192
-5	-24.6	68.0359
-5	-24.2	67.9572
-5	-23.8	67.9855
-5	-23.4	67.8985
-5	-23	68.0225
-5	-22.6	68.0118
-5	-22.2	67.9776
-5	-21.8	68.0771
-5	-21.4	67.9462
-5	-21	67.9498
-5	-20.6	67.985
-5	-20.2	67.966
-5	-19.8	67.9688
-5	-19.4	67.8947
-5	-19	67.9248
-5	-18.6	67.8868
-5	-18.2	67.9484
-5	-17.8	67.9063
-5	-17.4	67.9882
-5	-17	67.8628
-5	-16.6	67.9266
-5	-16.2	68.015
-5	-15.8	67.9262
-5	-15.4	67.9068
-5	-15	67.8716
-5	-14.6	67.9387
-5	-14.2	67.855
-5	-13.8	67.8374
-5	-13.4	67.7901
-5	-13	67.9535
-5	-12.6	67.9039
-5	-12.2	67.8498
-5	-11.8	67.9683
-5	-11.4	67.9433
-5	-11	67.8415
-5	-10.6	67.823
-5	-10.2	67.8415
-5	-9.8	67.8707
-5	-9.4	67.8929
-5	-9	67.7763
-5	-8.6	67.8411
-5	-8.2	67.8702
-5	-7.8	67.8475
-5	-7.4	67.7717
-5	-7	67.7661
-5	-6.6	67.7527
-5	-6.2	67.7892
-5	-5.8	67.7721
-5	-5.4	67.7869
-5	-5	67.6963
-5	-4.6	67.5958
-5	-4.2	67.5921
-5	-3.8	67.6486
-5	-3.4	67.5755
-5	-3	67.6269
-5	-2.6	67.6852
-5	-2.2	67.6528
-5	-1.8	67.6907
-5	-1.4	67.4621
-5	-1	67.5445
-5	-0.6	67.5977
-5	-0.2	67.5755
-5	0.2	67.6417
-5	0.6	67.5667
-5	1	67.5972
-5	1.4	67.5912
-5	1.8	67.5449
-5	2.2	67.5375
-5	2.6	67.5745
-5	3	67.5704
-5	3.4	67.5857
-5	3.8	67.5616
-5	4.2	67.5542
-5	4.6	67.4982
-5	5	67.4848
-5	5.4	67.551
-5	5.8	67.5866
-5	6.2	67.5593
-5	6.6	67.6185
-5	7	67.5574
-5	7.4	67.532
-5	7.8	67.5611
-5	8.2	67.501
-5	8.6	67.3835
-5	9	67.5413
-5	9.4	67.5001
-5	9.8	67.513
-5	10.2	67.5371
-5	10.6	67.6218
-5	11	67.6079
-5	11.4	67.4682
-5	11.8	67.4746
-5	12.2	67.4566
-5	12.6	67.3821
-5	13	67.4617
-5	13.4	67.4524
-5	13.8	67.4663
-5	14.2	67.4048
-5	14.6	67.396
-5	15	67.4719
-5	15.4	67.4372
-5	15.8	67.4358
-5	16.2	67.4686
-5	16.6	67.4011
-5	17	67.4246
-5	17.4	67.4621
-5	17.8	67.3885
-5	18.2	67.3811
-5	18.6	67.3687
-5	19	67.371
-5	19.4	67.3316
-5	19.8	67.4496
-5	20.2	67.4325
-5	20.6	67.352
-5	21	67.3376
-5	21.4	67.37
-5	21.8	67.3038
-5	22.2	67.3219
-5	22.6	67.2664
-5	23	67.3127
-5	23.4	67.2918
-5	23.8	67.2891
-5	24.2	67.266
-5	24.6	67.2188
-5	25	67.4149
-5	25.4	67.2853
-5	25.8	67.2131
-5	26.2	67.2724
-5	26.6	67.2775
-5	27	67.32
-5	27.4	67.2839
-5	27.8	67.2854
-5	28.2	67.2428
-5	28.6	67.2271
-5	29	67.2317
-5	29.4	67.2812
-5	29.8	67.1868
-5	30.2	67.2862
-5	30.6	67.2275
-5	31	67.1613
-5	31.4	67.1372
-5	31.8	67.1502
-5	32.2	67.1719
-5	32.6	67.1359
-5	33	67.0999
-5	33.4	67.1632
-5	33.8	67.2317
-5	34.2	67.1471
-5	34.6	67.123
-5	35	67.1207
-5	35.4	67.1429
-5	35.8	67.1119
-5	36.2	67.0674
-5	36.6	67.1248
-5	37	67.0979
-5	37.4	67.0923
-5	37.8	67.0965
-5	38.2	67.1039
-5	38.6	67.0229
-5	39	67.0946
-5	39.4	67.0345
-5	39.8	67.1016
-5	40.2	67.0262
-5	40.6	67.0016
-5	41	67.0479
-5	41.4	66.9415
-5	41.8	67.0146
-5	42.2	67.0021
-5	42.6	67.0294
-5	43	67.0498
-5	43.4	67.0082
-5	43.8	66.8985
-5	44.2	67.0119
-5	44.6	66.9694
-5	45	66.9721
-5	45.4	66.9055
-5	45.8	66.9134
-5	46.2	66.8791
-5	46.6	66.9268
-5	47	66.9203
-5	47.4	66.9217
-5	47.8	66.862
-5	48.2	66.8564
-5	48.6	66.8624
-5	49	66.8578
-5	49.4	66.8814
-5	49.8	66.9022
-5	50.2	66.8569
-5	50.6	66.9138
-5	51	66.9087
-5	51.4	66.8462
-5	51.8	66.8597
-5	52.2	66.8148
-5	52.6	66.7833
-5	53	66.8444
-5	53.4	66.8027
-5	53.8	66.8504
-5	54.2	66.8152
-5	54.6	66.8189
-5	55	66.8004
-5	55.4	66.7393
-5	55.8	66.7634
-5	56.2	66.8189
-5	56.6	66.7773
-5	57	66.7162
-5	57.4	66.7213
-5	57.8	66.7468
-5	58.2	66.7509
-5	58.6	66.7662
-5	59	66.7763
-5	59.4	66.7356
-5	59.8	66.7208
-5	60.2	66.6634
-5	60.6	66.7278
-5	61	66.6718
-5	61.4	66.6574
-5	61.8	66.7009
-5	62.2	66.6343
-5	62.6	66.6417
-5	63	66.6384
-5	63.4	66.6074
-5	63.8	66.6657
-5	64.2	66.6018
-5	64.6	66.5671
-4.6	-104.2	72.6254
-4.6	-103.8	72.6522
-4.6	-103.4	72.5805
-4.6	-103	72.6911
-4.6	-102.6	72.6115
-4.6	-102.2	72.5948
-4.6	-101.8	72.6429
-4.6	-101.4	72.624
-4.6	-101	72.6323
-4.6	-100.6	72.6369
-4.6	-100.2	72.6452
-4.6	-99.8	72.7072
-4.6	-99.4	72.6359
-4.6	-99	72.585
-4.6	-98.6	72.6225
-4.6	-98.2	72.6299
-4.6	-97.8	72.5753
-4.6	-97.4	72.6137
-4.6	-97	72.6641
-4.6	-96.6	72.6123
-4.6	-96.2	72.5781
-4.6	-95.8	72.6452
-4.6	-95.4	72.6424
-4.6	-95	72.567
-4.6	-94.6	72.5735
-4.6	-94.2	72.5647
-4.6	-93.8	72.6133
-4.6	-93.4	72.5804
-4.6	-93	72.5572
-4.6	-92.6	72.5943
-4.6	-92.2	72.5369
-4.6	-91.8	72.5406
-4.6	-91.4	72.5716
-4.6	-91	72.5906
-4.6	-90.6	72.5503
-4.6	-90.2	72.5814
-4.6	-89.8	72.6272
-4.6	-89.4	72.6253
-4.6	-89	72.5901
-4.6	-88.6	72.5577
-4.6	-88.2	72.5221
-4.6	-87.8	72.5448
-4.6	-87.4	72.5943
-4.6	-87	72.6212
-4.6	-86.6	72.5009
-4.6	-86.2	72.5454
-4.6	-85.8	72.5245
-4.6	-85.4	72.5568
-4.6	-85	72.5383
-4.6	-84.6	72.5342
-4.6	-84.2	72.561
-4.6	-83.8	72.4615
-4.6	-83.4	72.5841
-4.6	-83	72.5254
-4.6	-82.6	72.5546
-4.6	-82.2	72.5458
-4.6	-81.8	72.5717
-4.6	-81.4	72.5221
-4.6	-81	72.604
-4.6	-80.6	72.561
-4.6	-80.2	72.6045
-4.6	-79.8	72.6133
-4.6	-79.4	72.5147
-4.6	-79	72.6064
-4.6	-78.6	72.5073
-4.6	-78.2	72.5832
-4.6	-77.8	72.5652
-4.6	-77.4	72.5458
-4.6	-77	72.4579
-4.6	-76.6	72.4847
-4.6	-76.2	72.5652
-4.6	-75.8	72.4615
-4.6	-75.4	72.5804
-4.6	-75	72.4883
-4.6	-74.6	72.5707
-4.6	-74.2	72.523
-4.6	-73.8	72.4781
-4.6	-73.4	72.5244
-4.6	-73	72.4693
-4.6	-72.6	72.5225
-4.6	-72.2	72.4744
-4.6	-71.8	72.4865
-4.6	-71.4	72.5114
-4.6	-71	72.5457
-4.6	-70.6	72.5851
-4.6	-70.2	72.5397
-4.6	-69.8	72.5221
-4.6	-69.4	72.5313
-4.6	-69	72.5355
-4.6	-68.6	72.5318
-4.6	-68.2	72.5114
-4.6	-67.8	72.5207
-4.6	-67.4	72.4772
-4.6	-67	72.455
-4.6	-66.6	72.4768
-4.6	-66.2	72.4805
-4.6	-65.8	72.4453
-4.6	-65.4	72.536
-4.6	-65	72.499
-4.6	-64.6	72.5101
-4.6	-64.2	72.4749
-4.6	-63.8	72.4754
-4.6	-63.4	72.4957
-4.6	-63	72.5202
-4.6	-62.6	72.4693
-4.6	-62.2	72.4374
-4.6	-61.8	72.4536
-4.6	-61.4	72.4448
-4.6	-61	72.4133
-4.6	-60.6	72.4948
-4.6	-60.2	72.4846
-4.6	-59.8	72.4037
-4.6	-59.4	72.5124
-4.6	-59	72.4444
-4.6	-58.6	72.455
-4.6	-58.2	72.5258
-4.6	-57.8	72.4656
-4.6	-57.4	72.4827
-4.6	-57	72.4434
-4.6	-56.6	72.4828
-4.6	-56.2	72.5087
-4.6	-55.8	72.3865
-4.6	-55.4	72.4592
-4.6	-55	72.4241
-4.6	-54.6	72.469
-4.6	-54.2	72.4481
-4.6	-53.8	72.4518
-4.6	-53.4	72.3889
-4.6	-53	72.4167
-4.6	-52.6	72.4032
-4.6	-52.2	72.382
-4.6	-51.8	72.4269
-4.6	-51.4	72.3745
-4.6	-51	72.3759
-4.6	-50.6	72.3593
-4.6	-50.2	72.3005
-4.6	-49.8	72.3986
-4.6	-49.4	72.4111
-4.6	-49	72.3963
-4.6	-48.6	72.4046
-4.6	-48.2	72.4324
-4.6	-47.8	72.4018
-4.6	-47.4	72.4041
-4.6	-47	72.3329
-4.6	-46.6	72.4208
-4.6	-46.2	72.38
-4.6	-45.8	72.3412
-4.6	-45.4	72.3342
-4.6	-45	72.4022
-4.6	-44.6	72.3805
-4.6	-44.2	72.2694
-4.6	-43.8	72.386
-4.6	-43.4	72.3278
-4.6	-43	72.2352
-4.6	-42.6	72.2792
-4.6	-42.2	72.3231
-4.6	-41.8	72.3801
-4.6	-41.4	72.3333
-4.6	-41	72.3731
-4.6	-40.6	72.288
-4.6	-40.2	72.3097
-4.6	-39.8	72.3338
-4.6	-39.4	72.2741
-4.6	-39	72.2963
-4.6	-38.6	72.3254
-4.6	-38.2	72.2824
-4.6	-37.8	72.2768
-4.6	-37.4	72.2621
-4.6	-37	72.2926
-4.6	-36.6	72.2662
-4.6	-36.2	72.2366
-4.6	-35.8	72.2111
-4.6	-35.4	72.2213
-4.6	-35	72.3023
-4.6	-34.6	72.1922
-4.6	-34.2	72.2723
-4.6	-33.8	72.1686
-4.6	-33.4	72.1945
-4.6	-33	72.2033
-4.6	-32.6	72.2413
-4.6	-32.2	72.2413
-4.6	-31.8	72.2232
-4.6	-31.4	72.2024
-4.6	-31	72.2708
-4.6	-30.6	72.2319
-4.6	-30.2	72.1745
-4.6	-29.8	72.1731
-4.6	-29.4	72.0829
-4.6	-29	72.1963
-4.6	-28.6	72.1769
-4.6	-28.2	72.0265
-4.6	-27.8	72.1917
-4.6	-27.4	72.1325
-4.6	-27	72.1158
-4.6	-26.6	72.0399
-4.6	-26.2	72.1361
-4.6	-25.8	72.0649
-4.6	-25.4	72.057
-4.6	-25	71.9969
-4.6	-24.6	72.1043
-4.6	-24.2	72.0909
-4.6	-23.8	72.071
-4.6	-23.4	72.1746
-4.6	-23	72.083
-4.6	-22.6	72.1278
-4.6	-22.2	72.0853
-4.6	-21.8	72.0936
-4.6	-21.4	72.0441
-4.6	-21	71.9922
-4.6	-20.6	72.0584
-4.6	-20.2	71.9848
-4.6	-19.8	71.9664
-4.6	-19.4	72.0325
-4.6	-19	72.0395
-4.6	-18.6	72.0163
-4.6	-18.2	72.0279
-4.6	-17.8	71.9899
-4.6	-17.4	71.9418
-4.6	-17	71.8687
-4.6	-16.6	71.8978
-4.6	-16.2	71.9645
-4.6	-15.8	71.8627
-4.6	-15.4	72.0019
-4.6	-15	71.9275
-4.6	-14.6	71.9784
-4.6	-14.2	71.8984
-4.6	-13.8	71.9173
-4.6	-13.4	71.9386
-4.6	-13	71.9812
-4.6	-12.6	71.9317
-4.6	-12.2	71.9492
-4.6	-11.8	71.9349
-4.6	-11.4	71.8192
-4.6	-11	71.8262
-4.6	-10.6	71.9525
-4.6	-10.2	71.9248
-4.6	-9.8	71.835
-4.6	-9.4	71.89
-4.6	-9	71.828
-4.6	-8.6	71.8502
-4.6	-8.2	71.7822
-4.6	-7.8	71.8844
-4.6	-7.4	71.8266
-4.6	-7	71.7738
-4.6	-6.6	71.84
-4.6	-6.2	71.8358
-4.6	-5.8	71.8127
-4.6	-5.4	71.8099
-4.6	-5	71.6864
-4.6	-4.6	71.6873
-4.6	-4.2	71.691
-4.6	-3.8	71.6993
-4.6	-3.4	71.6281
-4.6	-3	71.7258
-4.6	-2.6	71.7105
-4.6	-2.2	71.7563
-4.6	-1.8	71.7582
-4.6	-1.4	71.6911
-4.6	-1	71.7197
-4.6	-0.6	71.6735
-4.6	-0.2	71.6841
-4.6	0.2	71.6253
-4.6	0.6	71.6619
-4.6	1	71.6702
-4.6	1.4	71.6554
-4.6	1.8	71.642
-4.6	2.2	71.6137
-4.6	2.6	71.6248
-4.6	3	71.604
-4.6	3.4	71.5101
-4.6	3.8	71.5934
-4.6	4.2	71.5133
-4.6	4.6	71.5448
-4.6	5	71.5517
-4.6	5.4	71.6151
-4.6	5.8	71.6632
-4.6	6.2	71.5938
-4.6	6.6	71.5365
-4.6	7	71.5938
-4.6	7.4	71.4976
-4.6	7.8	71.5346
-4.6	8.2	71.4679
-4.6	8.6	71.4739
-4.6	9	71.5831
-4.6	9.4	71.5355
-4.6	9.8	71.4249
-4.6	10.2	71.5934
-4.6	10.6	71.4328
-4.6	11	71.4523
-4.6	11.4	71.4046
-4.6	11.8	71.4343
-4.6	12.2	71.4689
-4.6	12.6	71.4689
-4.6	13	71.3764
-4.6	13.4	71.424
-4.6	13.8	71.3699
-4.6	14.2	71.3791
-4.6	14.6	71.3509
-4.6	15	71.3398
-4.6	15.4	71.3662
-4.6	15.8	71.3463
-4.6	16.2	71.3334
-4.6	16.6	71.3264
-4.6	17	71.3616
-4.6	17.4	71.3431
-4.6	17.8	71.2969
-4.6	18.2	71.3311
-4.6	18.6	71.2691
-4.6	19	71.2636
-4.6	19.4	71.3011
-4.6	19.8	71.2955
-4.6	20.2	71.2201
-4.6	20.6	71.2807
-4.6	21	71.3112
-4.6	21.4	71.2626
-4.6	21.8	71.3612
-4.6	22.2	71.3038
-4.6	22.6	71.2741
-4.6	23	71.2662
-4.6	23.4	71.2454
-4.6	23.8	71.2112
-4.6	24.2	71.2051
-4.6	24.6	71.256
-4.6	25	71.2019
-4.6	25.4	71.1866
-4.6	25.8	71.2292
-4.6	26.2	71.1774
-4.6	26.6	71.1125
-4.6	27	71.1486
-4.6	27.4	71.1329
-4.6	27.8	71.1639
-4.6	28.2	71.0728
-4.6	28.6	71.0903
-4.6	29	71.0709
-4.6	29.4	71.0927
-4.6	29.8	71.0987
-4.6	30.2	71.1015
-4.6	30.6	71.052
-4.6	31	71.0399
-4.6	31.4	71.1149
-4.6	31.8	71.0746
-4.6	32.2	71.0589
-4.6	32.6	71.026
-4.6	33	71.0607
-4.6	33.4	71.0344
-4.6	33.8	70.9645
-4.6	34.2	71.0418
-4.6	34.6	70.9775
-4.6	35	70.9423
-4.6	35.4	71.0205
-4.6	35.8	70.9566
-4.6	36.2	70.9053
-4.6	36.6	70.9553
-4.6	37	70.8863
-4.6	37.4	70.9113
-4.6	37.8	70.9192
-4.6	38.2	70.9534
-4.6	38.6	70.8563
-4.6	39	70.9405
-4.6	39.4	70.9012
-4.6	39.8	70.9044
-4.6	40.2	70.9202
-4.6	40.6	70.897
-4.6	41	70.9003
-4.6	41.4	70.8979
-4.6	41.8	70.8906
-4.6	42.2	70.8771
-4.6	42.6	70.8567
-4.6	43	70.8086
-4.6	43.4	70.8211
-4.6	43.8	70.8854
-4.6	44.2	70.7929
-4.6	44.6	70.7827
-4.6	45	70.7933
-4.6	45.4	70.736
-4.6	45.8	70.8354
-4.6	46.2	70.7401
-4.6	46.6	70.8433
-4.6	47	70.798
-4.6	47.4	70.6869
-4.6	47.8	70.7873
-4.6	48.2	70.7369
-4.6	48.6	70.716
-4.6	49	70.6809
-4.6	49.4	70.6318
-4.6	49.8	70.7109
-4.6	50.2	70.6527
-4.6	50.6	70.6268
-4.6	51	70.698
-4.6	51.4	70.7087
-4.6	51.8	70.692
-4.6	52.2	70.636
-4.6	52.6	70.6258
-4.6	53	70.6202
-4.6	53.4	70.5855
-4.6	53.8	70.6045
-4.6	54.2	70.5943
-4.6	54.6	70.5365
-4.6	55	70.6161
-4.6	55.4	70.5948
-4.6	55.8	70.629
-4.6	56.2	70.6068
-4.6	56.6	70.6337
-4.6	57	70.5577
-4.6	57.4	70.5541
-4.6	57.8	70.5605
-4.6	58.2	70.5073
-4.6	58.6	70.4508
-4.6	59	70.4573
-4.6	59.4	70.5341
-4.6	59.8	70.4712
-4.6	60.2	70.4583
-4.6	60.6	70.449
-4.6	61	70.4601
-4.6	61.4	70.4301
-4.6	61.8	70.4046
-4.6	62.2	70.4097
-4.6	62.6	70.418
-4.6	63	70.3477
-4.6	63.4	70.3121
-4.6	63.8	70.3542
-4.6	64.2	70.3177
-4.6	64.6	70.2941
-4.6	65	70.3908
-4.2	-103.8	78.063
-4.2	-103.4	77.9741
-4.2	-103	77.9204
-4.2	-102.6	77.9792
-4.2	-102.2	78.0041
-4.2	-101.8	78.0083
-4.2	-101.4	77.9398
-4.2	-101	77.8861
-4.2	-100.6	77.9189
-4.2	-100.2	77.9152
-4.2	-99.8	77.9041
-4.2	-99.4	77.9727
-4.2	-99	77.8991
-4.2	-98.6	77.8769
-4.2	-98.2	77.9449
-4.2	-97.8	77.8945
-4.2	-97.4	77.8917
-4.2	-97	77.9033
-4.2	-96.6	77.907
-4.2	-96.2	77.9195
-4.2	-95.8	77.9501
-4.2	-95.4	77.9228
-4.2	-95	77.9195
-4.2	-94.6	77.8445
-4.2	-94.2	77.9074
-4.2	-93.8	77.9042
-4.2	-93.4	77.9334
-4.2	-93	77.9167
-4.2	-92.6	77.8834
-4.2	-92.2	77.9029
-4.2	-91.8	77.9043
-4.2	-91.4	77.8834
-4.2	-91	77.8474
-4.2	-90.6	77.8672
-4.2	-90.2	77.8728
-4.2	-89.8	77.8561
-4.2	-89.4	77.8867
-4.2	-89	77.8705
-4.2	-88.6	77.8117
-4.2	-88.2	77.8848
-4.2	-87.8	77.8566
-4.2	-87.4	77.8158
-4.2	-87	77.8195
-4.2	-86.6	77.7769
-4.2	-86.2	77.8301
-4.2	-85.8	77.8181
-4.2	-85.4	77.8056
-4.2	-85	77.8232
-4.2	-84.6	77.7973
-4.2	-84.2	77.7982
-4.2	-83.8	77.7644
-4.2	-83.4	77.8042
-4.2	-83	77.8037
-4.2	-82.6	77.8199
-4.2	-82.2	77.7824
-4.2	-81.8	77.8223
-4.2	-81.4	77.8264
-4.2	-81	77.7533
-4.2	-80.6	77.7598
-4.2	-80.2	77.7464
-4.2	-79.8	77.6969
-4.2	-79.4	77.7802
-4.2	-79	77.7381
-4.2	-78.6	77.7048
-4.2	-78.2	77.7775
-4.2	-77.8	77.7372
-4.2	-77.4	77.709
-4.2	-77	77.7261
-4.2	-76.6	77.7358
-4.2	-76.2	77.7857
-4.2	-75.8	77.6932
-4.2	-75.4	77.695
-4.2	-75	77.6955
-4.2	-74.6	77.6627
-4.2	-74.2	77.6789
-4.2	-73.8	77.7265
-4.2	-73.4	77.6987
-4.2	-73	77.7159
-4.2	-72.6	77.7135
-4.2	-72.2	77.6497
-4.2	-71.8	77.6571
-4.2	-71.4	77.6654
-4.2	-71	77.6141
-4.2	-70.6	77.7404
-4.2	-70.2	77.6308
-4.2	-69.8	77.7141
-4.2	-69.4	77.6557
-4.2	-69	77.6525
-4.2	-68.6	77.7367
-4.2	-68.2	77.6154
-4.2	-67.8	77.5645
-4.2	-67.4	77.6751
-4.2	-67	77.6603
-4.2	-66.6	77.6025
-4.2	-66.2	77.6446
-4.2	-65.8	77.6367
-4.2	-65.4	77.5891
-4.2	-65	77.614
-4.2	-64.6	77.566
-4.2	-64.2	77.5752
-4.2	-63.8	77.553
-4.2	-63.4	77.5539
-4.2	-63	77.5336
-4.2	-62.6	77.6414
-4.2	-62.2	77.6002
-4.2	-61.8	77.558
-4.2	-61.4	77.5451
-4.2	-61	77.5307
-4.2	-60.6	77.5136
-4.2	-60.2	77.5613
-4.2	-59.8	77.5363
-4.2	-59.4	77.6613
-4.2	-59	77.5794
-4.2	-58.6	77.5387
-4.2	-58.2	77.5127
-4.2	-57.8	77.5405
-4.2	-57.4	77.5729
-4.2	-57	77.5294
-4.2	-56.6	77.5724
-4.2	-56.2	77.5248
-4.2	-55.8	77.4632
-4.2	-55.4	77.4785
-4.2	-55	77.4873
-4.2	-54.6	77.5091
-4.2	-54.2	77.4725
-4.2	-53.8	77.5109
-4.2	-53.4	77.5451
-4.2	-53	77.5284
-4.2	-52.6	77.4354
-4.2	-52.2	77.5062
-4.2	-51.8	77.4206
-4.2	-51.4	77.533
-4.2	-51	77.4021
-4.2	-50.6	77.4104
-4.2	-50.2	77.4068
-4.2	-49.8	77.3827
-4.2	-49.4	77.4123
-4.2	-49	77.4387
-4.2	-48.6	77.3614
-4.2	-48.2	77.4498
-4.2	-47.8	77.429
-4.2	-47.4	77.4133
-4.2	-47	77.3989
-4.2	-46.6	77.3082
-4.2	-46.2	77.3605
-4.2	-45.8	77.3624
-4.2	-45.4	77.3721
-4.2	-45	77.4225
-4.2	-44.6	77.3003
-4.2	-44.2	77.4207
-4.2	-43.8	77.3452
-4.2	-43.4	77.3517
-4.2	-43	77.3202
-4.2	-42.6	77.3105
-4.2	-42.2	77.2827
-4.2	-41.8	77.3276
-4.2	-41.4	77.3161
-4.2	-41	77.3364
-4.2	-40.6	77.2346
-4.2	-40.2	77.3323
-4.2	-39.8	77.3271
-4.2	-39.4	77.2938
-4.2	-39	77.3021
-4.2	-38.6	77.2799
-4.2	-38.2	77.3688
-4.2	-37.8	77.2591
-4.2	-37.4	77.3063
-4.2	-37	77.2026
-4.2	-36.6	77.2434
-4.2	-36.2	77.323
-4.2	-35.8	77.1846
-4.2	-35.4	77.1637
-4.2	-35	77.2012
-4.2	-34.6	77.1591
-4.2	-34.2	77.1452
-4.2	-33.8	77.1688
-4.2	-33.4	77.2072
-4.2	-33	77.1171
-4.2	-32.6	77.0837
-4.2	-32.2	77.1184
-4.2	-31.8	77.1967
-4.2	-31.4	77.1402
-4.2	-31	77.1453
-4.2	-30.6	77.118
-4.2	-30.2	77.1092
-4.2	-29.8	77.1101
-4.2	-29.4	77.0495
-4.2	-29	77.1153
-4.2	-28.6	77.1421
-4.2	-28.2	77.1171
-4.2	-27.8	77.0916
-4.2	-27.4	77.1013
-4.2	-27	77.0176
-4.2	-26.6	77.0976
-4.2	-26.2	76.993
-4.2	-25.8	77.0361
-4.2	-25.4	77.0768
-4.2	-25	77.0421
-4.2	-24.6	77.0592
-4.2	-24.2	76.9477
-4.2	-23.8	76.9394
-4.2	-23.4	77.0417
-4.2	-23	76.9759
-4.2	-22.6	77.0079
-4.2	-22.2	76.8755
-4.2	-21.8	76.9926
-4.2	-21.4	76.9801
-4.2	-21	76.9963
-4.2	-20.6	76.9783
-4.2	-20.2	76.9719
-4.2	-19.8	76.8446
-4.2	-19.4	76.8696
-4.2	-19	76.913
-4.2	-18.6	76.9575
-4.2	-18.2	76.8251
-4.2	-17.8	76.9065
-4.2	-17.4	76.8792
-4.2	-17	77.0148
-4.2	-16.6	76.9597
-4.2	-16.2	76.7269
-4.2	-15.8	76.8519
-4.2	-15.4	76.7991
-4.2	-15	76.8093
-4.2	-14.6	76.8283
-4.2	-14.2	76.7936
-4.2	-13.8	76.7848
-4.2	-13.4	76.8255
-4.2	-13	76.8042
-4.2	-12.6	76.6571
-4.2	-12.2	76.7418
-4.2	-11.8	76.6377
-4.2	-11.4	76.7492
-4.2	-11	76.665
-4.2	-10.6	76.7534
-4.2	-10.2	76.6609
-4.2	-9.8	76.6501
-4.2	-9.4	76.6645
-4.2	-9	76.6927
-4.2	-8.6	76.7135
-4.2	-8.2	76.6288
-4.2	-7.8	76.6233
-4.2	-7.4	76.6432
-4.2	-7	76.5919
-4.2	-6.6	76.5766
-4.2	-6.2	76.6132
-4.2	-5.8	76.5425
-4.2	-5.4	76.6105
-4.2	-5	76.6235
-4.2	-4.6	76.5415
-4.2	-4.2	76.6076
-4.2	-3.8	76.585
-4.2	-3.4	76.5442
-4.2	-3	76.5114
-4.2	-2.6	76.5471
-4.2	-2.2	76.573
-4.2	-1.8	76.5027
-4.2	-1.4	76.5309
-4.2	-1	76.5772
-4.2	-0.6	76.5656
-4.2	-0.2	76.485
-4.2	0.2	76.4998
-4.2	0.6	76.5081
-4.2	1	76.4327
-4.2	1.4	76.5063
-4.2	1.8	76.528
-4.2	2.2	76.4744
-4.2	2.6	76.4869
-4.2	3	76.4541
-4.2	3.4	76.4513
-4.2	3.8	76.4938
-4.2	4.2	76.3944
-4.2	4.6	76.4962
-4.2	5	76.4374
-4.2	5.4	76.3841
-4.2	5.8	76.3758
-4.2	6.2	76.3679
-4.2	6.6	76.4141
-4.2	7	76.3544
-4.2	7.4	76.3443
-4.2	7.8	76.3272
-4.2	8.2	76.3077
-4.2	8.6	76.3234
-4.2	9	76.3605
-4.2	9.4	76.3286
-4.2	9.8	76.2906
-4.2	10.2	76.2689
-4.2	10.6	76.2249
-4.2	11	76.2291
-4.2	11.4	76.212
-4.2	11.8	76.187
-4.2	12.2	76.2292
-4.2	12.6	76.2912
-4.2	13	76.243
-4.2	13.4	76.1796
-4.2	13.8	76.2379
-4.2	14.2	76.2657
-4.2	14.6	76.1829
-4.2	15	76.2157
-4.2	15.4	76.2133
-4.2	15.8	76.1916
-4.2	16.2	76.1342
-4.2	16.6	76.1425
-4.2	17	76.1013
-4.2	17.4	76.0514
-4.2	17.8	76.1467
-4.2	18.2	76.1916
-4.2	18.6	76.119
-4.2	19	76.0801
-4.2	19.4	76.1393
-4.2	19.8	76.0357
-4.2	20.2	76.1319
-4.2	20.6	76.0389
-4.2	21	76.0454
-4.2	21.4	76.0815
-4.2	21.8	76.0079
-4.2	22.2	76.0565
-4.2	22.6	75.9737
-4.2	23	76.0204
-4.2	23.4	75.9751
-4.2	23.8	76.0088
-4.2	24.2	75.9343
-4.2	24.6	75.9941
-4.2	25	75.9709
-4.2	25.4	75.9584
-4.2	25.8	75.9807
-4.2	26.2	75.9006
-4.2	26.6	75.9173
-4.2	27	75.8752
-4.2	27.4	75.853
-4.2	27.8	75.9103
-4.2	28.2	75.8932
-4.2	28.6	75.816
-4.2	29	75.7882
-4.2	29.4	75.8516
-4.2	29.8	75.8363
-4.2	30.2	75.8483
-4.2	30.6	75.7937
-4.2	31	75.7506
-4.2	31.4	75.7317
-4.2	31.8	75.7377
-4.2	32.2	75.7686
-4.2	32.6	75.7571
-4.2	33	75.8135
-4.2	33.4	75.7321
-4.2	33.8	75.7076
-4.2	34.2	75.6933
-4.2	34.6	75.7335
-4.2	35	75.7122
-4.2	35.4	75.6868
-4.2	35.8	75.708
-4.2	36.2	75.7423
-4.2	36.6	75.6701
-4.2	37	75.6336
-4.2	37.4	75.6461
-4.2	37.8	75.6266
-4.2	38.2	75.5771
-4.2	38.6	75.5929
-4.2	39	75.61
-4.2	39.4	75.5739
-4.2	39.8	75.5193
-4.2	40.2	75.6044
-4.2	40.6	75.5211
-4.2	41	75.554
-4.2	41.4	75.5716
-4.2	41.8	75.46
-4.2	42.2	75.5183
-4.2	42.6	75.4068
-4.2	43	75.4323
-4.2	43.4	75.5614
-4.2	43.8	75.4258
-4.2	44.2	75.4721
-4.2	44.6	75.4776
-4.2	45	75.3795
-4.2	45.4	75.4545
-4.2	45.8	75.3851
-4.2	46.2	75.3851
-4.2	46.6	75.4374
-4.2	47	75.3717
-4.2	47.4	75.3712
-4.2	47.8	75.2861
-4.2	48.2	75.3203
-4.2	48.6	75.355
-4.2	49	75.318
-4.2	49.4	75.3411
-4.2	49.8	75.3309
-4.2	50.2	75.3037
-4.2	50.6	75.3453
-4.2	51	75.2824
-4.2	51.4	75.2408
-4.2	51.8	75.2209
-4.2	52.2	75.2773
-4.2	52.6	75.2042
-4.2	53	75.1574
-4.2	53.4	75.1583
-4.2	53.8	75.1829
-4.2	54.2	75.162
-4.2	54.6	75.1569
-4.2	55	75.2014
-4.2	55.4	75.1425
-4.2	55.8	75.1009
-4.2	56.2	75.0889
-4.2	56.6	75.0569
-4.2	57	75.0889
-4.2	57.4	75.0444
-4.2	57.8	75.0852
-4.2	58.2	75.0792
-4.2	58.6	75.0376
-4.2	59	75.0348
-4.2	59.4	75.082
-4.2	59.8	74.9284
-4.2	60.2	75.0066
-4.2	60.6	74.9158
-4.2	61	74.9121
-4.2	61.4	74.9477
-4.2	61.8	74.8926
-4.2	62.2	74.9833
-4.2	62.6	74.8815
-4.2	63	74.8334
-4.2	63.4	74.8108
-4.2	63.8	74.8177
-4.2	64.2	74.7238
-4.2	64.6	74.7932
-4.2	65	74.7604
-4.2	65.4	74.7442
-3.8	-103.4	84.5755
-3.8	-103	84.6699
-3.8	-102.6	84.6551
-3.8	-102.2	84.6487
-3.8	-101.8	84.7097
-3.8	-101.4	84.5931
-3.8	-101	84.5802
-3.8	-100.6	84.6172
-3.8	-100.2	84.5617
-3.8	-99.8	84.5912
-3.8	-99.4	84.5625
-3.8	-99	84.6328
-3.8	-98.6	84.5226
-3.8	-98.2	84.6003
-3.8	-97.8	84.6119
-3.8	-97.4	84.6133
-3.8	-97	84.5347
-3.8	-96.6	84.5712
-3.8	-96.2	84.5527
-3.8	-95.8	84.531
-3.8	-95.4	84.5347
-3.8	-95	84.4861
-3.8	-94.6	84.5032
-3.8	-94.2	84.5416
-3.8	-93.8	84.518
-3.8	-93.4	84.5264
-3.8	-93	84.4908
-3.8	-92.6	84.513
-3.8	-92.2	84.5278
-3.8	-91.8	84.4256
-3.8	-91.4	84.4376
-3.8	-91	84.4348
-3.8	-90.6	84.4242
-3.8	-90.2	84.3812
-3.8	-89.8	84.4594
-3.8	-89.4	84.4081
-3.8	-89	84.4354
-3.8	-88.6	84.4233
-3.8	-88.2	84.3706
-3.8	-87.8	84.3821
-3.8	-87.4	84.4177
-3.8	-87	84.3553
-3.8	-86.6	84.3922
-3.8	-86.2	84.3909
-3.8	-85.8	84.3696
-3.8	-85.4	84.3469
-3.8	-85	84.352
-3.8	-84.6	84.3487
-3.8	-84.2	84.3233
-3.8	-83.8	84.3876
-3.8	-83.4	84.2858
-3.8	-83	84.3363
-3.8	-82.6	84.334
-3.8	-82.2	84.3215
-3.8	-81.8	84.2895
-3.8	-81.4	84.2478
-3.8	-81	84.3006
-3.8	-80.6	84.2802
-3.8	-80.2	84.3112
-3.8	-79.8	84.3056
-3.8	-79.4	84.3144
-3.8	-79	84.264
-3.8	-78.6	84.2798
-3.8	-78.2	84.2206
-3.8	-77.8	84.2511
-3.8	-77.4	84.2442
-3.8	-77	84.2465
-3.8	-76.6	84.1766
-3.8	-76.2	84.1576
-3.8	-75.8	84.1937
-3.8	-75.4	84.1719
-3.8	-75	84.1354
-3.8	-74.6	84.1691
-3.8	-74.2	84.159
-3.8	-73.8	84.1992
-3.8	-73.4	84.1182
-3.8	-73	84.1349
-3.8	-72.6	84.1928
-3.8	-72.2	84.1307
-3.8	-71.8	84.1127
-3.8	-71.4	84.1701
-3.8	-71	84.1539
-3.8	-70.6	84.1336
-3.8	-70.2	84.0882
-3.8	-69.8	84.1373
-3.8	-69.4	84.0896
-3.8	-69	84.1327
-3.8	-68.6	84.0152
-3.8	-68.2	84.0674
-3.8	-67.8	84.0702
-3.8	-67.4	84.0271
-3.8	-67	84.0803
-3.8	-66.6	84.0762
-3.8	-66.2	83.9942
-3.8	-65.8	84.0525
-3.8	-65.4	84.0808
-3.8	-65	84.0229
-3.8	-64.6	84.065
-3.8	-64.2	84.0507
-3.8	-63.8	83.9299
-3.8	-63.4	83.9993
-3.8	-63	83.991
-3.8	-62.6	83.9387
-3.8	-62.2	83.9892
-3.8	-61.8	83.8911
-3.8	-61.4	83.9725
-3.8	-61	83.9443
-3.8	-60.6	83.9244
-3.8	-60.2	84.0739
-3.8	-59.8	83.9411
-3.8	-59.4	83.9545
-3.8	-59	83.9323
-3.8	-58.6	83.9407
-3.8	-58.2	83.9629
-3.8	-57.8	83.942
-3.8	-57.4	83.9254
-3.8	-57	83.8814
-3.8	-56.6	83.8416
-3.8	-56.2	83.8231
-3.8	-55.8	83.8985
-3.8	-55.4	83.8231
-3.8	-55	83.8425
-3.8	-54.6	83.8351
-3.8	-54.2	83.7444
-3.8	-53.8	83.767
-3.8	-53.4	83.8286
-3.8	-53	83.7929
-3.8	-52.6	83.8137
-3.8	-52.2	83.8383
-3.8	-51.8	83.761
-3.8	-51.4	83.6698
-3.8	-51	83.7152
-3.8	-50.6	83.7601
-3.8	-50.2	83.7264
-3.8	-49.8	83.6894
-3.8	-49.4	83.663
-3.8	-49	83.7181
-3.8	-48.6	83.6732
-3.8	-48.2	83.6685
-3.8	-47.8	83.6903
-3.8	-47.4	83.6398
-3.8	-47	83.7074
-3.8	-46.6	83.6519
-3.8	-46.2	83.7092
-3.8	-45.8	83.6935
-3.8	-45.4	83.6385
-3.8	-45	83.5931
-3.8	-44.6	83.6727
-3.8	-44.2	83.6287
-3.8	-43.8	83.5792
-3.8	-43.4	83.6283
-3.8	-43	83.657
-3.8	-42.6	83.633
-3.8	-42.2	83.6006
-3.8	-41.8	83.5418
-3.8	-41.4	83.5747
-3.8	-41	83.5778
-3.8	-40.6	83.5547
-3.8	-40.2	83.5528
-3.8	-39.8	83.4839
-3.8	-39.4	83.4908
-3.8	-39	83.4838
-3.8	-38.6	83.4297
-3.8	-38.2	83.5246
-3.8	-37.8	83.464
-3.8	-37.4	83.5075
-3.8	-37	83.4474
-3.8	-36.6	83.4321
-3.8	-36.2	83.4728
-3.8	-35.8	83.4038
-3.8	-35.4	83.4816
-3.8	-35	83.439
-3.8	-34.6	83.3622
-3.8	-34.2	83.3622
-3.8	-33.8	83.3932
-3.8	-33.4	83.4006
-3.8	-33	83.3488
-3.8	-32.6	83.3826
-3.8	-32.2	83.3447
-3.8	-31.8	83.3363
-3.8	-31.4	83.3201
-3.8	-31	83.3525
-3.8	-30.6	83.3501
-3.8	-30.2	83.3418
-3.8	-29.8	83.2228
-3.8	-29.4	83.3072
-3.8	-29	83.2609
-3.8	-28.6	83.3044
-3.8	-28.2	83.284
-3.8	-27.8	83.2243
-3.8	-27.4	83.2576
-3.8	-27	83.2261
-3.8	-26.6	83.2756
-3.8	-26.2	83.2501
-3.8	-25.8	83.1942
-3.8	-25.4	83.2289
-3.8	-25	83.2108
-3.8	-24.6	83.1993
-3.8	-24.2	83.1581
-3.8	-23.8	83.1396
-3.8	-23.4	83.1428
-3.8	-23	83.2006
-3.8	-22.6	83.1155
-3.8	-22.2	83.1932
-3.8	-21.8	83.0725
-3.8	-21.4	83.1085
-3.8	-21	83.0595
-3.8	-20.6	83.0576
-3.8	-20.2	82.9804
-3.8	-19.8	83.1025
-3.8	-19.4	83.0855
-3.8	-19	83.0804
-3.8	-18.6	83.061
-3.8	-18.2	83.1147
-3.8	-17.8	82.9689
-3.8	-17.4	83.1457
-3.8	-17	82.9268
-3.8	-16.6	83.0901
-3.8	-16.2	82.8342
-3.8	-15.8	82.9971
-3.8	-15.4	82.9975
-3.8	-15	82.9489
-3.8	-14.6	82.8952
-3.8	-14.2	82.8915
-3.8	-13.8	82.9586
-3.8	-13.4	82.8989
-3.8	-13	82.8757
-3.8	-12.6	82.7633
-3.8	-12.2	82.8429
-3.8	-11.8	82.7596
-3.8	-11.4	82.761
-3.8	-11	82.7522
-3.8	-10.6	82.7906
-3.8	-10.2	82.7925
-3.8	-9.8	82.6292
-3.8	-9.4	82.7023
-3.8	-9	82.761
-3.8	-8.6	82.7888
-3.8	-8.2	82.6412
-3.8	-7.8	82.7337
-3.8	-7.4	82.7017
-3.8	-7	82.5999
-3.8	-6.6	82.6096
-3.8	-6.2	82.7069
-3.8	-5.8	82.6759
-3.8	-5.4	82.5334
-3.8	-5	82.5292
-3.8	-4.6	82.5089
-3.8	-4.2	82.576
-3.8	-3.8	82.3613
-3.8	-3.4	82.4858
-3.8	-3	82.4904
-3.8	-2.6	82.3391
-3.8	-2.2	82.4705
-3.8	-1.8	82.4215
-3.8	-1.4	82.4113
-3.8	-1	82.4303
-3.8	-0.6	82.3895
-3.8	-0.2	82.4066
-3.8	0.2	82.3965
-3.8	0.6	82.3988
-3.8	1	82.3585
-3.8	1.4	82.3335
-3.8	1.8	82.3044
-3.8	2.2	82.3294
-3.8	2.6	82.3285
-3.8	3	82.3308
-3.8	3.4	82.3701
-3.8	3.8	82.2771
-3.8	4.2	82.2104
-3.8	4.6	82.3164
-3.8	5	82.2706
-3.8	5.4	82.2585
-3.8	5.8	82.2706
-3.8	6.2	82.1642
-3.8	6.6	82.2067
-3.8	7	82.1234
-3.8	7.4	82.2007
-3.8	7.8	82.2151
-3.8	8.2	82.1855
-3.8	8.6	82.1655
-3.8	9	82.166
-3.8	9.4	82.185
-3.8	9.8	82.1206
-3.8	10.2	82.0114
-3.8	10.6	82.116
-3.8	11	82.0457
-3.8	11.4	82.0614
-3.8	11.8	81.9458
-3.8	12.2	82.0517
-3.8	12.6	82.0772
-3.8	13	81.9958
-3.8	13.4	82.024
-3.8	13.8	82.0647
-3.8	14.2	81.9324
-3.8	14.6	81.9708
-3.8	15	81.9393
-3.8	15.4	81.9694
-3.8	15.8	81.9625
-3.8	16.2	81.956
-3.8	16.6	81.8977
-3.8	17	81.943
-3.8	17.4	81.9079
-3.8	17.8	81.8708
-3.8	18.2	81.8421
-3.8	18.6	81.8366
-3.8	19	81.8643
-3.8	19.4	81.7995
-3.8	19.8	81.7926
-3.8	20.2	81.7893
-3.8	20.6	81.8435
-3.8	21	81.7949
-3.8	21.4	81.7893
-3.8	21.8	81.7519
-3.8	22.2	81.8444
-3.8	22.6	81.8
-3.8	23	81.7917
-3.8	23.4	81.6894
-3.8	23.8	81.6954
-3.8	24.2	81.6912
-3.8	24.6	81.6848
-3.8	25	81.6343
-3.8	25.4	81.6061
-3.8	25.8	81.6658
-3.8	26.2	81.6454
-3.8	26.6	81.651
-3.8	27	81.5986
-3.8	27.4	81.6416
-3.8	27.8	81.5718
-3.8	28.2	81.6176
-3.8	28.6	81.5593
-3.8	29	81.5408
-3.8	29.4	81.5847
-3.8	29.8	81.513
-3.8	30.2	81.5214
-3.8	30.6	81.5126
-3.8	31	81.4311
-3.8	31.4	81.4256
-3.8	31.8	81.4732
-3.8	32.2	81.4853
-3.8	32.6	81.3386
-3.8	33	81.4765
-3.8	33.4	81.4372
-3.8	33.8	81.4006
-3.8	34.2	81.4256
-3.8	34.6	81.3914
-3.8	35	81.3687
-3.8	35.4	81.2895
-3.8	35.8	81.2969
-3.8	36.2	81.3034
-3.8	36.6	81.365
-3.8	37	81.2248
-3.8	37.4	81.2845
-3.8	37.8	81.2762
-3.8	38.2	81.2762
-3.8	38.6	81.186
-3.8	39	81.2336
-3.8	39.4	81.2378
-3.8	39.8	81.1494
-3.8	40.2	81.1317
-3.8	40.6	81.1119
-3.8	41	81.1544
-3.8	41.4	81.1192
-3.8	41.8	81.0864
-3.8	42.2	81.1225
-3.8	42.6	81.0855
-3.8	43	81.0985
-3.8	43.4	81.0517
-3.8	43.8	81.0777
-3.8	44.2	81.1105
-3.8	44.6	80.9666
-3.8	45	81.0032
-3.8	45.4	81.0429
-3.8	45.8	80.9517
-3.8	46.2	80.8995
-3.8	46.6	80.9346
-3.8	47	80.9082
-3.8	47.4	80.916
-3.8	47.8	80.8647
-3.8	48.2	80.8435
-3.8	48.6	80.869
-3.8	49	80.8514
-3.8	49.4	80.7844
-3.8	49.8	80.7779
-3.8	50.2	80.7126
-3.8	50.6	80.7436
-3.8	51	80.7024
-3.8	51.4	80.7449
-3.8	51.8	80.6811
-3.8	52.2	80.6667
-3.8	52.6	80.7047
-3.8	53	80.6209
-3.8	53.4	80.6135
-3.8	53.8	80.5765
-3.8	54.2	80.4853
-3.8	54.6	80.5122
-3.8	55	80.5649
-3.8	55.4	80.4798
-3.8	55.8	80.5806
-3.8	56.2	80.5214
-3.8	56.6	80.3886
-3.8	57	80.458
-3.8	57.4	80.3909
-3.8	57.8	80.4214
-3.8	58.2	80.3904
-3.8	58.6	80.2979
-3.8	59	80.3039
-3.8	59.4	80.2331
-3.8	59.8	80.254
-3.8	60.2	80.2114
-3.8	60.6	80.1975
-3.8	61	80.1415
-3.8	61.4	80.1637
-3.8	61.8	80.0591
-3.8	62.2	80.0489
-3.8	62.6	80.0795
-3.8	63	80.0156
-3.8	63.4	80.0003
-3.8	63.8	79.9689
-3.8	64.2	79.9555
-3.8	64.6	79.9833
-3.8	65	79.9352
-3.8	65.4	79.8704
-3.8	65.8	79.8362
-3.4	-103	93.4239
-3.4	-102.6	93.4795
-3.4	-102.2	93.442
-3.4	-101.8	93.4874
-3.4	-101.4	93.4017
-3.4	-101	93.3883
-3.4	-100.6	93.4133
-3.4	-100.2	93.3262
-3.4	-99.8	93.353
-3.4	-99.4	93.3993
-3.4	-99	93.3211
-3.4	-98.6	93.3285
-3.4	-98.2	93.3752
-3.4	-97.8	93.235
-3.4	-97.4	93.2554
-3.4	-97	93.2564
-3.4	-96.6	93.2545
-3.4	-96.2	93.2675
-3.4	-95.8	93.286
-3.4	-95.4	93.2101
-3.4	-95	93.2013
-3.4	-94.6	93.1694
-3.4	-94.2	93.1865
-3.4	-93.8	93.0648
-3.4	-93.4	93.1004
-3.4	-93	93.1277
-3.4	-92.6	93.1106
-3.4	-92.2	93.1379
-3.4	-91.8	93.1083
-3.4	-91.4	93.1342
-3.4	-91	93.1078
-3.4	-90.6	92.9698
-3.4	-90.2	92.981
-3.4	-89.8	93.0443
-3.4	-89.4	92.9532
-3.4	-89	93.0027
-3.4	-88.6	92.9939
-3.4	-88.2	92.9773
-3.4	-87.8	92.9389
-3.4	-87.4	92.9227
-3.4	-87	92.8473
-3.4	-86.6	92.9343
-3.4	-86.2	92.8844
-3.4	-85.8	92.845
-3.4	-85.4	92.8238
-3.4	-85	92.9459
-3.4	-84.6	92.8751
-3.4	-84.2	92.7584
-3.4	-83.8	92.856
-3.4	-83.4	92.8135
-3.4	-83	92.8139
-3.4	-82.6	92.8084
-3.4	-82.2	92.8722
-3.4	-81.8	92.7746
-3.4	-81.4	92.776
-3.4	-81	92.7556
-3.4	-80.6	92.7658
-3.4	-80.2	92.6964
-3.4	-79.8	92.7482
-3.4	-79.4	92.6871
-3.4	-79	92.6667
-3.4	-78.6	92.6385
-3.4	-78.2	92.6973
-3.4	-77.8	92.6862
-3.4	-77.4	92.5941
-3.4	-77	92.6173
-3.4	-76.6	92.6154
-3.4	-76.2	92.6117
-3.4	-75.8	92.6307
-3.4	-75.4	92.5428
-3.4	-75	92.6103
-3.4	-74.6	92.5983
-3.4	-74.2	92.6154
-3.4	-73.8	92.577
-3.4	-73.4	92.54
-3.4	-73	92.5117
-3.4	-72.6	92.446
-3.4	-72.2	92.5325
-3.4	-71.8	92.5584
-3.4	-71.4	92.4664
-3.4	-71	92.5362
-3.4	-70.6	92.4733
-3.4	-70.2	92.4279
-3.4	-69.8	92.4257
-3.4	-69.4	92.3938
-3.4	-69	92.3721
-3.4	-68.6	92.3971
-3.4	-68.2	92.3818
-3.4	-67.8	92.4003
-3.4	-67.4	92.3415
-3.4	-67	92.3263
-3.4	-66.6	92.3304
-3.4	-66.2	92.3022
-3.4	-65.8	92.3115
-3.4	-65.4	92.2944
-3.4	-65	92.2643
-3.4	-64.6	92.2472
-3.4	-64.2	92.218
-3.4	-63.8	92.2055
-3.4	-63.4	92.2157
-3.4	-63	92.2161
-3.4	-62.6	92.1726
-3.4	-62.2	92.1569
-3.4	-61.8	92.1143
-3.4	-61.4	92.1949
-3.4	-61	92.0926
-3.4	-60.6	92.1287
-3.4	-60.2	92.1486
-3.4	-59.8	92.1338
-3.4	-59.4	92.068
-3.4	-59	92.0986
-3.4	-58.6	92.0384
-3.4	-58.2	92.0958
-3.4	-57.8	92.0241
-3.4	-57.4	92.0356
-3.4	-57	92.0051
-3.4	-56.6	91.9935
-3.4	-56.2	92.0125
-3.4	-55.8	91.9667
-3.4	-55.4	92.025
-3.4	-55	91.9417
-3.4	-54.6	91.9408
-3.4	-54.2	91.9274
-3.4	-53.8	91.9033
-3.4	-53.4	91.8714
-3.4	-53	91.9033
-3.4	-52.6	91.8617
-3.4	-52.2	91.8723
-3.4	-51.8	91.901
-3.4	-51.4	91.882
-3.4	-51	91.8288
-3.4	-50.6	91.8251
-3.4	-50.2	91.8306
-3.4	-49.8	91.8098
-3.4	-49.4	91.7038
-3.4	-49	91.7177
-3.4	-48.6	91.7001
-3.4	-48.2	91.6969
-3.4	-47.8	91.7613
-3.4	-47.4	91.7307
-3.4	-47	91.7645
-3.4	-46.6	91.7168
-3.4	-46.2	91.6512
-3.4	-45.8	91.6863
-3.4	-45.4	91.6512
-3.4	-45	91.6145
-3.4	-44.6	91.6011
-3.4	-44.2	91.6141
-3.4	-43.8	91.5558
-3.4	-43.4	91.5345
-3.4	-43	91.4975
-3.4	-42.6	91.54
-3.4	-42.2	91.4859
-3.4	-41.8	91.5243
-3.4	-41.4	91.5229
-3.4	-41	91.4471
-3.4	-40.6	91.5391
-3.4	-40.2	91.4665
-3.4	-39.8	91.5012
-3.4	-39.4	91.553
-3.4	-39	91.3004
-3.4	-38.6	91.5105
-3.4	-38.2	91.4374
-3.4	-37.8	91.324
-3.4	-37.4	91.3777
-3.4	-37	91.3411
-3.4	-36.6	91.3661
-3.4	-36.2	91.2221
-3.4	-35.8	91.329
-3.4	-35.4	91.2207
-3.4	-35	91.2332
-3.4	-34.6	91.2698
-3.4	-34.2	91.2217
-3.4	-33.8	91.1805
-3.4	-33.4	91.211
-3.4	-33	91.2688
-3.4	-32.6	91.1823
-3.4	-32.2	91.2142
-3.4	-31.8	91.18
-3.4	-31.4	91.1582
-3.4	-31	91.1198
-3.4	-30.6	91.1536
-3.4	-30.2	91.1203
-3.4	-29.8	91.131
-3.4	-29.4	91.1
-3.4	-29	91.0824
-3.4	-28.6	90.9991
-3.4	-28.2	90.9635
-3.4	-27.8	91.0555
-3.4	-27.4	91.0787
-3.4	-27	90.9191
-3.4	-26.6	91.0218
-3.4	-26.2	90.9677
-3.4	-25.8	90.9788
-3.4	-25.4	90.92
-3.4	-25	90.964
-3.4	-24.6	90.9357
-3.4	-24.2	90.8746
-3.4	-23.8	90.9523
-3.4	-23.4	90.8524
-3.4	-23	90.7955
-3.4	-22.6	90.8269
-3.4	-22.2	90.7806
-3.4	-21.8	90.7223
-3.4	-21.4	90.7441
-3.4	-21	90.6737
-3.4	-20.6	90.7691
-3.4	-20.2	90.7117
-3.4	-19.8	90.6729
-3.4	-19.4	90.7436
-3.4	-19	90.6067
-3.4	-18.6	90.6807
-3.4	-18.2	90.5599
-3.4	-17.8	90.6641
-3.4	-17.4	90.578
-3.4	-17	90.5308
-3.4	-16.6	90.5294
-3.4	-16.2	90.5109
-3.4	-15.8	90.5424
-3.4	-15.4	90.4985
-3.4	-15	90.4702
-3.4	-14.6	90.5244
-3.4	-14.2	90.4545
-3.4	-13.8	90.4351
-3.4	-13.4	90.3801
-3.4	-13	90.3731
-3.4	-12.6	90.393
-3.4	-12.2	90.4643
-3.4	-11.8	90.3726
-3.4	-11.4	90.3832
-3.4	-11	90.3892
-3.4	-10.6	90.3365
-3.4	-10.2	90.3758
-3.4	-9.8	90.2601
-3.4	-9.4	90.2902
-3.4	-9	90.2666
-3.4	-8.6	90.2101
-3.4	-8.2	90.2073
-3.4	-7.8	90.1874
-3.4	-7.4	90.1957
-3.4	-7	90.1314
-3.4	-6.6	90.1758
-3.4	-6.2	90.0573
-3.4	-5.8	90.0421
-3.4	-5.4	90.1244
-3.4	-5	90.1343
-3.4	-4.6	90.0528
-3.4	-4.2	90.0801
-3.4	-3.8	90.0852
-3.4	-3.4	89.9793
-3.4	-3	89.8683
-3.4	-2.6	89.9331
-3.4	-2.2	89.9766
-3.4	-1.8	89.8706
-3.4	-1.4	89.9608
-3.4	-1	89.9978
-3.4	-0.6	89.8748
-3.4	-0.2	89.8914
-3.4	0.2	89.8512
-3.4	0.6	89.8447
-3.4	1	89.8952
-3.4	1.4	89.8128
-3.4	1.8	89.7651
-3.4	2.2	89.8257
-3.4	2.6	89.7327
-3.4	3	89.7253
-3.4	3.4	89.7415
-3.4	3.8	89.6925
-3.4	4.2	89.7258
-3.4	4.6	89.6291
-3.4	5	89.6513
-3.4	5.4	89.6184
-3.4	5.8	89.6341
-3.4	6.2	89.5957
-3.4	6.6	89.5869
-3.4	7	89.5656
-3.4	7.4	89.5295
-3.4	7.8	89.5868
-3.4	8.2	89.5508
-3.4	8.6	89.5845
-3.4	9	89.4892
-3.4	9.4	89.4582
-3.4	9.8	89.5045
-3.4	10.2	89.4929
-3.4	10.6	89.4721
-3.4	11	89.4892
-3.4	11.4	89.4175
-3.4	11.8	89.5105
-3.4	12.2	89.4082
-3.4	12.6	89.4184
-3.4	13	89.4374
-3.4	13.4	89.3435
-3.4	13.8	89.3431
-3.4	14.2	89.3227
-3.4	14.6	89.3009
-3.4	15	89.3074
-3.4	15.4	89.3189
-3.4	15.8	89.2986
-3.4	16.2	89.3032
-3.4	16.6	89.2879
-3.4	17	89.2865
-3.4	17.4	89.2097
-3.4	17.8	89.1431
[truncated: 15,385 more rows]

## Sheet: Fig1c
Vint (V)	VBG (V)	RB (Ω)
5	-99.6	5174.66
5	-99.2	4804.27
5	-98.8	4437.56
5	-98.4	4094.56
5	-98	3774.79
5	-97.6	3485.74
5	-97.2	3217.01
5	-96.8	2976.83
5	-96.4	2758.32
5	-96	2560.39
5	-95.6	2379.8
5	-95.2	2215.6
5	-94.8	2066.59
5	-94.4	1928.47
5	-94	1805.93
5	-93.6	1692.01
5	-93.2	1588.17
5	-92.8	1494.14
5	-92.4	1406.13
5	-92	1325.11
5	-91.6	1251.24
5	-91.2	1184.17
5	-90.8	1121.15
5	-90.4	1061.98
5	-90	1008.79
5	-89.6	958.478
5	-89.2	912.099
5	-88.8	868.674
5	-88.4	828.414
5	-88	790.645
5	-87.6	755.379
5	-87.2	722.436
5	-86.8	691.565
5	-86.4	662.784
5	-86	635.356
5	-85.6	609.614
5	-85.2	585.735
5	-84.8	563.105
5	-84.4	541.741
5	-84	521.7
5	-83.6	502.679
5	-83.2	484.371
5	-82.8	467.467
5	-82.4	451.279
5	-82	435.809
5	-81.6	421.372
5	-81.2	407.735
5	-80.8	394.552
5	-80.4	381.901
5	-80	370.138
5	-79.6	358.835
5	-79.2	348.061
5	-78.8	337.862
5	-78.4	328.021
5	-78	318.62
5	-77.6	309.792
5	-77.2	301.175
5	-76.8	293.015
5	-76.4	285.273
5	-76	277.74
5	-75.6	270.5
5	-75.2	263.719
5	-74.8	257.078
5	-74.4	250.761
5	-74	244.733
5	-73.6	238.868
5	-73.2	233.285
5	-72.8	227.916
5	-72.4	222.688
5	-72	217.686
5	-71.6	212.914
5	-71.2	208.209
5	-70.8	203.777
5	-70.4	199.418
5	-70	195.23
5	-69.6	191.249
5	-69.2	187.386
5	-68.8	183.589
5	-68.4	179.957
5	-68	176.469
5	-67.6	173.076
5	-67.2	169.84
5	-66.8	166.707
5	-66.4	163.617
5	-66	160.639
5	-65.6	157.701
5	-65.2	154.865
5	-64.8	152.18
5	-64.4	149.585
5	-64	147.056
5	-63.6	144.6
5	-63.2	142.146
5	-62.8	139.863
5	-62.4	137.596
5	-62	135.477
5	-61.6	133.272
5	-61.2	131.253
5	-60.8	129.316
5	-60.4	127.373
5	-60	125.466
5	-59.6	123.634
5	-59.2	121.868
5	-58.8	120.092
5	-58.4	118.393
5	-58	116.762
5	-57.6	115.22
5	-57.2	113.684
5	-56.8	112.166
5	-56.4	110.705
5	-56	109.258
5	-55.6	107.884
5	-55.2	106.522
5	-54.8	105.163
5	-54.4	103.903
5	-54	102.65
5	-53.6	101.451
5	-53.2	100.222
5	-52.8	99.0638
5	-52.4	97.9889
5	-52	96.8432
5	-51.6	95.7919
5	-51.2	94.7419
5	-50.8	93.6841
5	-50.4	92.7332
5	-50	91.7078
5	-49.6	90.7837
5	-49.2	89.8703
5	-48.8	88.9804
5	-48.4	88.0456
5	-48	87.1993
5	-47.6	86.3524
5	-47.2	85.5546
5	-46.8	84.6726
5	-46.4	83.8915
5	-46	83.1165
5	-45.6	82.3761
5	-45.2	81.6779
5	-44.8	80.9347
5	-44.4	80.2392
5	-44	79.559
5	-43.6	78.8427
5	-43.2	78.2088
5	-42.8	77.5193
5	-42.4	76.902
5	-42	76.274
5	-41.6	75.7076
5	-41.2	75.0945
5	-40.8	74.5276
5	-40.4	73.9344
5	-40	73.3759
5	-39.6	72.8003
5	-39.2	72.2788
5	-38.8	71.7485
5	-38.4	71.2644
5	-38	70.6462
5	-37.6	70.1992
5	-37.2	69.7489
5	-36.8	69.3046
5	-36.4	68.7346
5	-36	68.3204
5	-35.6	67.8322
5	-35.2	67.4453
5	-34.8	66.9414
5	-34.4	66.5046
5	-34	66.1284
5	-33.6	65.7832
5	-33.2	65.327
5	-32.8	64.904
5	-32.4	64.5514
5	-32	64.1507
5	-31.6	63.7667
5	-31.2	63.3993
5	-30.8	63.08
5	-30.4	62.7653
5	-30	62.3775
5	-29.6	62.0517
5	-29.2	61.7195
5	-28.8	61.3919
5	-28.4	61.0429
5	-28	60.744
5	-27.6	60.4571
5	-27.2	60.1494
5	-26.8	59.7755
5	-26.4	59.5571
5	-26	59.2632
5	-25.6	59.0227
5	-25.2	58.7215
5	-24.8	58.4827
5	-24.4	58.169
5	-24	58.0524
5	-23.6	57.8085
5	-23.2	57.6368
5	-22.8	57.2685
5	-22.4	57.0579
5	-22	56.8053
5	-21.6	56.6489
5	-21.2	56.4832
5	-20.8	56.2407
5	-20.4	56.1773
5	-20	55.9399
5	-19.6	55.6725
5	-19.2	55.56
5	-18.8	55.3402
5	-18.4	55.2852
5	-18	55.0556
5	-17.6	54.9395
5	-17.2	54.8155
5	-16.8	54.6475
5	-16.4	54.6526
5	-16	54.461
5	-15.6	54.3819
5	-15.2	54.194
5	-14.8	54.1389
5	-14.4	53.9668
5	-14	53.8802
5	-13.6	53.9015
5	-13.2	53.8409
5	-12.8	53.7743
5	-12.4	53.6133
5	-12	53.611
5	-11.6	53.6258
5	-11.2	53.5203
5	-10.8	53.4587
5	-10.4	53.4162
5	-10	53.4207
5	-9.6	53.2902
5	-9.2	53.2662
5	-8.8	53.2176
5	-8.4	53.2375
5	-8	53.212
5	-7.6	53.156
5	-7.2	53.0825
5	-6.8	53.0612
5	-6.4	53.0478
5	-6	53.0094
5	-5.6	53.0297
5	-5.2	52.9765
5	-4.8	52.9561
5	-4.4	52.8738
5	-4	52.8664
5	-3.6	52.8095
5	-3.2	52.7567
5	-2.8	52.7789
5	-2.4	52.6688
5	-2	52.5925
5	-1.6	52.5059
5	-1.2	52.4463
5	-0.8	52.3473
5	-0.4	52.3126
5	0	51.8632
5	0.4	51.8008
5	0.8	51.7036
5	1.2	51.6643
5	1.6	51.68
5	2	51.537
5	2.4	51.5027
5	2.8	51.381
5	3.2	51.3
5	3.6	51.2598
5	4	51.0798
5	4.4	51.0279
5	4.8	50.8424
5	5.2	50.7623
5	5.6	50.6318
5	6	50.5342
5	6.4	50.419
5	6.8	50.2843
5	7.2	50.251
5	7.6	50.1117
5	8	49.9683
5	8.4	49.8642
5	8.8	49.7318
5	9.2	49.5823
5	9.6	49.5078
5	10	49.3325
5	10.4	49.2205
5	10.8	49.0382
5	11.2	48.9345
5	11.6	48.7902
5	12	48.7277
5	12.4	48.5745
5	12.8	48.4579
5	13.2	48.3672
5	13.6	48.252
5	14	48.0771
5	14.4	47.9785
5	14.8	47.8781
5	15.2	47.7397
5	15.6	47.6018
5	16	47.4607
5	16.4	47.3945
5	16.8	47.3019
5	17.2	47.1797
5	17.6	47.0636
5	18	46.9488
5	18.4	46.8628
5	18.8	46.7114
5	19.2	46.6531
5	19.6	46.5356
5	20	46.4209
5	20.4	46.2349
5	20.8	46.2131
5	21.2	46.0914
5	21.6	45.9309
5	22	45.88
5	22.4	45.7249
5	22.8	45.6504
5	23.2	45.5384
5	23.6	45.3797
5	24	45.3409
5	24.4	45.1854
5	24.8	45.0993
5	25.2	45.0419
5	25.6	44.9258
5	26	44.8661
5	26.4	44.7324
5	26.8	44.5862
5	27.2	44.5473
5	27.6	44.5325
5	28	44.3715
5	28.4	44.2956
5	28.8	44.2151
5	29.2	44.1364
5	29.6	44.0262
5	30	43.9393
5	30.4	43.849
5	30.8	43.7546
5	31.2	43.6333
5	31.6	43.5491
5	32	43.4182
5	32.4	43.3923
5	32.8	43.2835
5	33.2	43.2322
5	33.6	43.1734
5	34	43.0859
5	34.4	42.9832
5	34.8	42.9004
5	35.2	42.7454
5	35.6	42.7278
5	36	42.6094
5	36.4	42.5964
5	36.8	42.4071
5	37.2	42.3535
5	37.6	42.3326
5	38	42.2183
5	38.4	42.1781
5	38.8	42.1101
5	39.2	42.0004
5	39.6	41.9074
5	40	41.8778
5	40.4	41.8232
5	40.8	41.6908
5	41.2	41.6612
5	41.6	41.5853
5	42	41.5159
5	42.4	41.4956
5	42.8	41.373
5	43.2	41.3147
5	43.6	41.2689
5	44	41.1138
5	44.4	41.0814
5	44.8	41.0144
5	45.2	40.9898
5	45.6	40.8473
5	46	40.8524
5	46.4	40.7936
5	46.8	40.7186
5	47.2	40.6589
5	47.6	40.5409
5	48	40.5391
5	48.4	40.4581
5	48.8	40.4313
5	49.2	40.36
5	49.6	40.3253
5	50	40.2091
5	50.4	40.167
5	50.8	40.1416
5	51.2	40.0222
5	51.6	40.0009
5	52	39.9194
5	52.4	39.8787
5	52.8	39.8301
5	53.2	39.794
5	53.6	39.7177
5	54	39.6423
5	54.4	39.5553
5	54.8	39.509
5	55.2	39.4706
5	55.6	39.3993
5	56	39.2744
5	56.4	39.2874
5	56.8	39.2318
5	57.2	39.1906
5	57.6	39.1818
5	58	39.1129
5	58.4	39.0328
5	58.8	38.9977
5	59.2	39.0227
5	59.6	38.9195
5	60	38.883
5	60.4	38.8404
5	60.8	38.7446
5	61.2	38.6377
5	61.6	38.5997
5	62	38.6289
5	62.4	38.5535
5	62.8	38.5127
5	63.2	38.4494
5	63.6	38.4313
5	64	38.3535
5	64.4	38.3258
5	64.8	38.2591
5	65.2	38.2212
5	65.6	38.2096
5	66	38.1606
5	66.4	38.0967
5	66.8	38.0782
5	67.2	38.0648
5	67.6	37.9769
5	68	37.9616
5	68.4	37.9311
5	68.8	37.8682
5	69.2	37.8376
5	69.6	37.7988
4.6	-99.6	12461.3
4.6	-99.2	12585.6
4.6	-98.8	12648
4.6	-98.4	12625.9
4.6	-98	12500.5
4.6	-97.6	12310.2
4.6	-97.2	12020.3
4.6	-96.8	11642.1
4.6	-96.4	11176.1
4.6	-96	10626
4.6	-95.6	9997.29
4.6	-95.2	9337.08
4.6	-94.8	8647.34
4.6	-94.4	7956.28
4.6	-94	7295.36
4.6	-93.6	6651.87
4.6	-93.2	6057.08
4.6	-92.8	5515.48
4.6	-92.4	5021.66
4.6	-92	4578.4
4.6	-91.6	4178.46
4.6	-91.2	3823.27
4.6	-90.8	3501.26
4.6	-90.4	3214.25
4.6	-90	2960.3
4.6	-89.6	2730.11
4.6	-89.2	2521.31
4.6	-88.8	2337.44
4.6	-88.4	2169.3
4.6	-88	2017.77
4.6	-87.6	1881.79
4.6	-87.2	1757.58
4.6	-86.8	1644.25
4.6	-86.4	1541.14
4.6	-86	1447.33
4.6	-85.6	1361.19
4.6	-85.2	1283.3
4.6	-84.8	1210.17
4.6	-84.4	1143.88
4.6	-84	1082.74
4.6	-83.6	1025.75
4.6	-83.2	973.186
4.6	-82.8	925.146
4.6	-82.4	879.727
4.6	-82	837.692
4.6	-81.6	798.808
4.6	-81.2	762.611
4.6	-80.8	728.511
4.6	-80.4	696.523
4.6	-80	666.917
4.6	-79.6	638.841
4.6	-79.2	613.099
4.6	-78.8	588.662
4.6	-78.4	565.466
4.6	-78	543.796
4.6	-77.6	523.508
4.6	-77.2	504.158
4.6	-76.8	485.856
4.6	-76.4	468.616
4.6	-76	452.158
4.6	-75.6	436.66
4.6	-75.2	422.129
4.6	-74.8	408.272
4.6	-74.4	394.931
4.6	-74	382.341
4.6	-73.6	370.499
4.6	-73.2	359.147
4.6	-72.8	348.458
4.6	-72.4	338.071
4.6	-72	328.283
4.6	-71.6	318.955
4.6	-71.2	310.077
4.6	-70.8	301.46
4.6	-70.4	293.239
4.6	-70	285.273
4.6	-69.6	277.89
4.6	-69.2	270.747
4.6	-68.8	263.881
4.6	-68.4	257.292
4.6	-68	250.944
4.6	-67.6	244.879
4.6	-67.2	239.105
4.6	-66.8	233.419
4.6	-66.4	228.025
4.6	-66	222.73
4.6	-65.6	217.838
4.6	-65.2	212.997
4.6	-64.8	208.331
4.6	-64.4	203.857
4.6	-64	199.579
4.6	-63.6	195.474
4.6	-63.2	191.337
4.6	-62.8	187.416
4.6	-62.4	183.666
4.6	-62	179.988
4.6	-61.6	176.58
4.6	-61.2	173.187
4.6	-60.8	169.867
4.6	-60.4	166.703
4.6	-60	163.616
4.6	-59.6	160.65
4.6	-59.2	157.749
4.6	-58.8	154.999
4.6	-58.4	152.251
4.6	-58	149.693
4.6	-57.6	147.099
4.6	-57.2	144.574
4.6	-56.8	142.278
4.6	-56.4	139.982
4.6	-56	137.761
4.6	-55.6	135.582
4.6	-55.2	133.465
4.6	-54.8	131.436
4.6	-54.4	129.427
4.6	-54	127.473
4.6	-53.6	125.623
4.6	-53.2	123.768
4.6	-52.8	121.995
4.6	-52.4	120.298
4.6	-52	118.585
4.6	-51.6	116.982
4.6	-51.2	115.391
4.6	-50.8	113.864
4.6	-50.4	112.389
4.6	-50	110.942
4.6	-49.6	109.474
4.6	-49.2	108.114
4.6	-48.8	106.676
4.6	-48.4	105.407
4.6	-48	104.212
4.6	-47.6	102.876
4.6	-47.2	101.691
4.6	-46.8	100.507
4.6	-46.4	99.3254
4.6	-46	98.2912
4.6	-45.6	97.1718
4.6	-45.2	96.1033
4.6	-44.8	95.0358
4.6	-44.4	94.0483
4.6	-44	93.0937
4.6	-43.6	92.0909
4.6	-43.2	91.178
4.6	-42.8	90.2159
4.6	-42.4	89.3353
4.6	-42	88.4483
4.6	-41.6	87.5556
4.6	-41.2	86.7824
4.6	-40.8	85.8699
4.6	-40.4	85.0998
4.6	-40	84.3497
4.6	-39.6	83.5117
4.6	-39.2	82.8102
4.6	-38.8	82.0573
4.6	-38.4	81.3628
4.6	-38	80.6197
4.6	-37.6	79.9431
4.6	-37.2	79.249
4.6	-36.8	78.5674
4.6	-36.4	77.9344
4.6	-36	77.3199
4.6	-35.6	76.7669
4.6	-35.2	76.0881
4.6	-34.8	75.487
4.6	-34.4	74.9141
4.6	-34	74.2949
4.6	-33.6	73.8252
4.6	-33.2	73.2713
4.6	-32.8	72.6637
4.6	-32.4	72.1839
4.6	-32	71.6623
4.6	-31.6	71.1918
4.6	-31.2	70.668
4.6	-30.8	70.1867
4.6	-30.4	69.7106
4.6	-30	69.2562
4.6	-29.6	68.8184
4.6	-29.2	68.3038
4.6	-28.8	67.9415
4.6	-28.4	67.4857
4.6	-28	67.0938
4.6	-27.6	66.5913
4.6	-27.2	66.2609
4.6	-26.8	65.9078
4.6	-26.4	65.5181
4.6	-26	65.1331
4.6	-25.6	64.7726
4.6	-25.2	64.39
4.6	-24.8	64.0573
4.6	-24.4	63.7061
4.6	-24	63.4118
4.6	-23.6	63.0471
4.6	-23.2	62.694
4.6	-22.8	62.4154
4.6	-22.4	62.1165
4.6	-22	61.7722
4.6	-21.6	61.5566
4.6	-21.2	61.2285
4.6	-20.8	60.993
4.6	-20.4	60.8107
4.6	-20	60.5132
4.6	-19.6	60.2587
4.6	-19.2	59.9579
4.6	-18.8	59.7456
4.6	-18.4	59.5707
4.6	-18	59.3708
4.6	-17.6	59.3286
4.6	-17.2	58.9357
4.6	-16.8	58.8663
4.6	-16.4	58.6599
4.6	-16	58.5197
4.6	-15.6	58.2055
4.6	-15.2	58.144
4.6	-14.8	58.0413
4.6	-14.4	57.8946
4.6	-14	57.7113
4.6	-13.6	57.5484
4.6	-13.2	57.4984
4.6	-12.8	57.368
4.6	-12.4	57.2615
4.6	-12	57.2139
4.6	-11.6	57.0024
4.6	-11.2	56.9806
4.6	-10.8	56.9182
4.6	-10.4	56.8543
4.6	-10	56.7465
4.6	-9.6	56.6984
4.6	-9.2	56.7359
4.6	-8.8	56.6503
4.6	-8.4	56.6364
4.6	-8	56.4832
4.6	-7.6	56.4772
4.6	-7.2	56.5211
4.6	-6.8	56.4564
4.6	-6.4	56.3069
4.6	-6	56.4818
4.6	-5.6	56.3162
4.6	-5.2	56.3754
4.6	-4.8	56.3555
4.6	-4.4	56.188
4.6	-4	56.1773
4.6	-3.6	56.1422
4.6	-3.2	56.02
4.6	-2.8	55.9917
4.6	-2.4	55.9612
4.6	-2	55.9052
4.6	-1.6	55.9251
4.6	-1.2	55.7525
4.6	-0.8	55.7159
4.6	-0.4	55.6525
4.6	0	55.5346
4.6	0.4	55.5161
4.6	0.8	55.3606
4.6	1.2	55.2148
4.6	1.6	55.2005
4.6	2	55.0783
4.6	2.4	55.001
4.6	2.8	54.9159
4.6	3.2	54.79
4.6	3.6	54.5684
4.6	4	54.5383
4.6	4.4	54.4388
4.6	4.8	54.2292
4.6	5.2	54.1191
4.6	5.6	53.9201
4.6	6	53.8567
4.6	6.4	53.6933
4.6	6.8	53.53
4.6	7.2	53.3611
4.6	7.6	53.3222
4.6	8	53.0695
4.6	8.4	52.9178
4.6	8.8	52.8109
4.6	9.2	52.6198
4.6	9.6	52.5578
4.6	10	52.3496
4.6	10.4	52.2589
4.6	10.8	52.052
4.6	11.2	51.8822
4.6	11.6	51.7619
4.6	12	51.6407
4.6	12.4	51.4514
4.6	12.8	51.3505
4.6	13.2	51.1733
4.6	13.6	51.0863
4.6	14	50.9146
4.6	14.4	50.7827
4.6	14.8	50.6101
4.6	15.2	50.4986
4.6	15.6	50.4079
4.6	16	50.2728
4.6	16.4	50.158
4.6	16.8	49.9346
4.6	17.2	49.8244
4.6	17.6	49.6685
4.6	18	49.5995
4.6	18.4	49.4139
4.6	18.8	49.2765
4.6	19.2	49.1687
4.6	19.6	49.0252
4.6	20	48.9243
4.6	20.4	48.8147
4.6	20.8	48.6111
4.6	21.2	48.5255
4.6	21.6	48.3918
4.6	22	48.2571
4.6	22.4	48.1132
4.6	22.8	48.0456
4.6	23.2	47.9498
4.6	23.6	47.8004
4.6	24	47.6884
4.6	24.4	47.5834
4.6	24.8	47.4316
4.6	25.2	47.3201
4.6	25.6	47.2298
4.6	26	47.0868
4.6	26.4	47.0017
4.6	26.8	46.83
4.6	27.2	46.7708
4.6	27.6	46.6375
4.6	28	46.514
4.6	28.4	46.3678
4.6	28.8	46.2752
4.6	29.2	46.1901
4.6	29.6	46.0818
4.6	30	46.0077
4.6	30.4	45.8957
4.6	30.8	45.774
4.6	31.2	45.6843
4.6	31.6	45.5098
4.6	32	45.4585
4.6	32.4	45.3423
4.6	32.8	45.2377
4.6	33.2	45.1396
4.6	33.6	45.0748
4.6	34	44.9517
4.6	34.4	44.855
4.6	34.8	44.7481
4.6	35.2	44.6672
4.6	35.6	44.5649
4.6	36	44.4654
4.6	36.4	44.3891
4.6	36.8	44.2812
4.6	37.2	44.1919
4.6	37.6	44.1105
4.6	38	44.0411
4.6	38.4	43.9333
4.6	38.8	43.8181
4.6	39.2	43.7672
4.6	39.6	43.651
4.6	40	43.5816
4.6	40.4	43.4706
4.6	40.8	43.3998
4.6	41.2	43.3206
4.6	41.6	43.2878
4.6	42	43.2225
4.6	42.4	43.0846
4.6	42.8	42.9773
4.6	43.2	42.9194
4.6	43.6	42.788
4.6	44	42.7519
4.6	44.4	42.6746
4.6	44.8	42.6098
4.6	45.2	42.5344
4.6	45.6	42.4353
4.6	46	42.3534
4.6	46.4	42.2521
4.6	46.8	42.2387
4.6	47.2	42.1494
4.6	47.6	42.0513
4.6	48	41.9916
4.6	48.4	41.9357
4.6	48.8	41.8704
4.6	49.2	41.7848
4.6	49.6	41.7135
4.6	50	41.6224
4.6	50.4	41.5654
4.6	50.8	41.4646
4.6	51.2	41.422
4.6	51.6	41.348
4.6	52	41.2711
4.6	52.4	41.2119
4.6	52.8	41.1397
4.6	53.2	41.1074
4.6	53.6	41.0523
4.6	54	41.0278
4.6	54.4	40.907
4.6	54.8	40.8616
4.6	55.2	40.8112
4.6	55.6	40.7255
4.6	56	40.6839
4.6	56.4	40.645
4.6	56.8	40.584
4.6	57.2	40.5548
4.6	57.6	40.4674
4.6	58	40.3845
4.6	58.4	40.335
4.6	58.8	40.2901
4.6	59.2	40.1745
4.6	59.6	40.1402
4.6	60	40.0981
4.6	60.4	40.0403
4.6	60.8	39.9829
4.6	61.2	39.9343
4.6	61.6	39.8816
4.6	62	39.8543
4.6	62.4	39.7668
4.6	62.8	39.7015
4.6	63.2	39.7214
4.6	63.6	39.5743
4.6	64	39.5437
4.6	64.4	39.4822
4.6	64.8	39.4312
4.6	65.2	39.3581
4.6	65.6	39.3012
4.6	66	39.2364
4.6	66.4	39.2707
4.6	66.8	39.1804
4.6	67.2	39.1157
4.6	67.6	39.0828
4.6	68	39.0421
4.6	68.4	38.9787
4.6	68.8	38.9241
4.6	69.2	38.8644
4.6	69.6	38.8473
4.2	-99.6	3641.53
4.2	-99.2	3893.86
4.2	-98.8	4185.12
4.2	-98.4	4514.08
4.2	-98	4881
4.2	-97.6	5285.45
4.2	-97.2	5731.85
4.2	-96.8	6223.35
4.2	-96.4	6756.33
4.2	-96	7321.94
4.2	-95.6	7920.68
4.2	-95.2	8537.09
4.2	-94.8	9160.13
4.2	-94.4	9745.5
4.2	-94	10320.3
4.2	-93.6	10829.4
4.2	-93.2	11240.8
4.2	-92.8	11573.9
4.2	-92.4	11816.8
4.2	-92	11955.5
4.2	-91.6	11996.4
4.2	-91.2	11946.9
4.2	-90.8	11802.3
4.2	-90.4	11559.2
4.2	-90	11224.4
4.2	-89.6	10802.1
4.2	-89.2	10290.7
4.2	-88.8	9712.76
4.2	-88.4	9074.16
4.2	-88	8405.55
4.2	-87.6	7735.8
4.2	-87.2	7083.24
4.2	-86.8	6458.67
4.2	-86.4	5883.42
4.2	-86	5351.13
4.2	-85.6	4871.08
4.2	-85.2	4439.84
4.2	-84.8	4046.37
4.2	-84.4	3700.38
4.2	-84	3388.67
4.2	-83.6	3111.37
4.2	-83.2	2861.11
4.2	-82.8	2637.65
4.2	-82.4	2437.71
4.2	-82	2256.58
4.2	-81.6	2095.42
4.2	-81.2	1948.18
4.2	-80.8	1815.04
4.2	-80.4	1693.3
4.2	-80	1584.48
4.2	-79.6	1484.82
4.2	-79.2	1393.8
4.2	-78.8	1311.87
4.2	-78.4	1236.1
4.2	-78	1166.04
4.2	-77.6	1101.66
4.2	-77.2	1042.65
4.2	-76.8	987.938
4.2	-76.4	938.278
4.2	-76	890.997
4.2	-75.6	847.864
4.2	-75.2	808.387
4.2	-74.8	770.883
4.2	-74.4	735.484
4.2	-74	703.26
4.2	-73.6	672.797
4.2	-73.2	644.42
4.2	-72.8	617.923
4.2	-72.4	592.772
4.2	-72	569.28
4.2	-71.6	547.375
4.2	-71.2	526.581
4.2	-70.8	506.907
4.2	-70.4	488.709
4.2	-70	470.96
4.2	-69.6	454.53
4.2	-69.2	438.966
4.2	-68.8	424.046
4.2	-68.4	410.042
4.2	-68	396.674
4.2	-67.6	384.157
4.2	-67.2	372.13
4.2	-66.8	360.752
4.2	-66.4	349.743
4.2	-66	339.323
4.2	-65.6	329.475
4.2	-65.2	320.179
4.2	-64.8	310.99
4.2	-64.4	302.351
4.2	-64	294.089
4.2	-63.6	286.196
4.2	-63.2	278.656
4.2	-62.8	271.475
4.2	-62.4	264.506
4.2	-62	257.797
4.2	-61.6	251.461
4.2	-61.2	245.229
4.2	-60.8	239.306
4.2	-60.4	233.706
4.2	-60	228.242
4.2	-59.6	223.045
4.2	-59.2	217.975
4.2	-58.8	213.04
4.2	-58.4	208.42
4.2	-58	203.931
4.2	-57.6	199.494
4.2	-57.2	195.331
4.2	-56.8	191.327
4.2	-56.4	187.4
4.2	-56	183.593
4.2	-55.6	179.951
4.2	-55.2	176.418
4.2	-54.8	172.985
4.2	-54.4	169.724
4.2	-54	166.672
4.2	-53.6	163.532
4.2	-53.2	160.537
4.2	-52.8	157.644
4.2	-52.4	154.878
4.2	-52	152.146
4.2	-51.6	149.606
4.2	-51.2	147.086
4.2	-50.8	144.587
4.2	-50.4	142.276
4.2	-50	139.956
4.2	-49.6	137.756
4.2	-49.2	135.586
4.2	-48.8	133.413
4.2	-48.4	131.44
4.2	-48	129.39
4.2	-47.6	127.539
4.2	-47.2	125.659
4.2	-46.8	123.869
4.2	-46.4	122.104
4.2	-46	120.366
4.2	-45.6	118.738
4.2	-45.2	117.066
4.2	-44.8	115.524
4.2	-44.4	114.032
4.2	-44	112.561
4.2	-43.6	111.137
4.2	-43.2	109.636
4.2	-42.8	108.287
4.2	-42.4	106.978
4.2	-42	105.662
4.2	-41.6	104.441
4.2	-41.2	103.19
4.2	-40.8	102
4.2	-40.4	100.868
4.2	-40	99.702
4.2	-39.6	98.5581
4.2	-39.2	97.4689
4.2	-38.8	96.4319
4.2	-38.4	95.3703
4.2	-38	94.4268
4.2	-37.6	93.4236
4.2	-37.2	92.4602
4.2	-36.8	91.5014
4.2	-36.4	90.6259
4.2	-36	89.6921
4.2	-35.6	88.8281
4.2	-35.2	87.9665
4.2	-34.8	87.2016
4.2	-34.4	86.3483
4.2	-34	85.4339
4.2	-33.6	84.7611
4.2	-33.2	83.973
4.2	-32.8	83.2373
4.2	-32.4	82.5395
4.2	-32	81.8162
4.2	-31.6	81.0911
4.2	-31.2	80.3614
4.2	-30.8	79.7473
4.2	-30.4	79.0962
4.2	-30	78.422
4.2	-29.6	77.8385
4.2	-29.2	77.1416
4.2	-28.8	76.5604
4.2	-28.4	76.0329
4.2	-28	75.4841
4.2	-27.6	74.8649
4.2	-27.2	74.3282
4.2	-26.8	73.834
4.2	-26.4	73.275
4.2	-26	72.7845
4.2	-25.6	72.2524
4.2	-25.2	71.8346
4.2	-24.8	71.3233
4.2	-24.4	70.8471
4.2	-24	70.3825
4.2	-23.6	69.9059
4.2	-23.2	69.4783
4.2	-22.8	69.0591
4.2	-22.4	68.7041
4.2	-22	68.3441
4.2	-21.6	67.8337
4.2	-21.2	67.5551
4.2	-20.8	67.1432
4.2	-20.4	66.8684
4.2	-20	66.4459
4.2	-19.6	66.0493
4.2	-19.2	65.6412
4.2	-18.8	65.482
4.2	-18.4	65.1988
4.2	-18	64.8
4.2	-17.6	64.6875
4.2	-17.2	64.2812
4.2	-16.8	64.024
4.2	-16.4	63.6926
4.2	-16	63.4173
4.2	-15.6	63.3031
4.2	-15.2	63.0263
4.2	-14.8	62.9037
4.2	-14.4	62.6002
4.2	-14	62.3776
4.2	-13.6	62.1708
4.2	-13.2	61.9954
4.2	-12.8	61.8283
4.2	-12.4	61.6807
4.2	-12	61.7061
4.2	-11.6	61.4692
4.2	-11.2	61.3202
4.2	-10.8	61.2221
4.2	-10.4	61.0453
4.2	-10	61.0222
4.2	-9.6	60.881
4.2	-9.2	60.7057
4.2	-8.8	60.6765
4.2	-8.4	60.6936
4.2	-8	60.5437
4.2	-7.6	60.4748
4.2	-7.2	60.4526
4.2	-6.8	60.4271
4.2	-6.4	60.4257
4.2	-6	60.3489
4.2	-5.6	60.2975
4.2	-5.2	60.2684
4.2	-4.8	60.1851
4.2	-4.4	60.1453
4.2	-4	60.1342
4.2	-3.6	60.0689
4.2	-3.2	60.0782
4.2	-2.8	60.0107
4.2	-2.4	59.9213
4.2	-2	59.8714
4.2	-1.6	59.7978
4.2	-1.2	59.7201
4.2	-0.8	59.6178
4.2	-0.4	59.5266
4.2	0	59.5553
4.2	0.4	59.4424
4.2	0.8	59.3462
4.2	1.2	59.2314
4.2	1.6	59.1375
4.2	2	59.0468
4.2	2.4	58.8704
4.2	2.8	58.7858
4.2	3.2	58.6159
4.2	3.6	58.4465
4.2	4	58.3443
4.2	4.4	58.2152
4.2	4.8	58.0361
4.2	5.2	57.9176
4.2	5.6	57.7547
4.2	6	57.6053
4.2	6.4	57.435
4.2	6.8	57.1953
4.2	7.2	57.0583
4.2	7.6	56.9528
4.2	8	56.7552
4.2	8.4	56.6095
4.2	8.8	56.4138
4.2	9.2	56.2347
4.2	9.6	56.0094
4.2	10	55.8386
4.2	10.4	55.7178
4.2	10.8	55.5207
4.2	11.2	55.3865
4.2	11.6	55.1278
4.2	12	55.0367
4.2	12.4	54.8617
4.2	12.8	54.7016
4.2	13.2	54.5151
4.2	13.6	54.3134
4.2	14	54.1153
4.2	14.4	53.9793
4.2	14.8	53.8062
4.2	15.2	53.5845
4.2	15.6	53.4452
4.2	16	53.3499
4.2	16.4	53.1931
4.2	16.8	53.0071
4.2	17.2	52.7826
4.2	17.6	52.6729
4.2	18	52.5346
4.2	18.4	52.325
4.2	18.8	52.2023
4.2	19.2	52.0436
4.2	19.6	51.8789
4.2	20	51.7317
4.2	20.4	51.5055
4.2	20.8	51.3625
4.2	21.2	51.2556
4.2	21.6	51.1274
4.2	22	50.9979
4.2	22.4	50.8239
4.2	22.8	50.6046
4.2	23.2	50.5291
4.2	23.6	50.3713
4.2	24	50.2473
4.2	24.4	50.1215
4.2	24.8	49.9785
4.2	25.2	49.8341
4.2	25.6	49.6726
4.2	26	49.5644
4.2	26.4	49.4019
4.2	26.8	49.2321
4.2	27.2	49.0951
4.2	27.6	49.0345
4.2	28	48.8744
4.2	28.4	48.7513
4.2	28.8	48.5829
4.2	29.2	48.5098
4.2	29.6	48.3422
4.2	30	48.234
4.2	30.4	48.0937
4.2	30.8	47.9554
4.2	31.2	47.8684
4.2	31.6	47.7258
4.2	32	47.5597
4.2	32.4	47.4732
4.2	32.8	47.3714
4.2	33.2	47.2229
4.2	33.6	47.0748
4.2	34	46.9739
4.2	34.4	46.8652
4.2	34.8	46.762
4.2	35.2	46.6532
4.2	35.6	46.4917
4.2	36	46.3899
4.2	36.4	46.3112
4.2	36.8	46.1794
4.2	37.2	46.0882
4.2	37.6	45.9693
4.2	38	45.9193
4.2	38.4	45.7509
4.2	38.8	45.7079
4.2	39.2	45.5454
4.2	39.6	45.4635
4.2	40	45.3428
4.2	40.4	45.2738
4.2	40.8	45.1401
4.2	41.2	45.0476
4.2	41.6	44.961
4.2	42	44.8689
4.2	42.4	44.7958
4.2	42.8	44.6991
4.2	43.2	44.5941
4.2	43.6	44.539
4.2	44	44.4418
4.2	44.4	44.3044
4.2	44.8	44.1753
4.2	45.2	44.1216
4.2	45.6	44.0462
4.2	46	43.9393
4.2	46.4	43.8666
4.2	46.8	43.7907
4.2	47.2	43.7449
4.2	47.6	43.6144
4.2	48	43.5483
4.2	48.4	43.4242
4.2	48.8	43.397
4.2	49.2	43.3183
4.2	49.6	43.2309
4.2	50	43.1406
4.2	50.4	43.0777
4.2	50.8	42.937
4.2	51.2	42.9222
4.2	51.6	42.838
4.2	52	42.7251
4.2	52.4	42.633
4.2	52.8	42.5858
4.2	53.2	42.5117
4.2	53.6	42.4317
4.2	54	42.3651
4.2	54.4	42.2651
4.2	54.8	42.2013
4.2	55.2	42.1008
4.2	55.6	42.0319
4.2	56	41.9893
4.2	56.4	41.9273
4.2	56.8	41.8269
4.2	57.2	41.745
4.2	57.6	41.6746
4.2	58	41.6353
4.2	58.4	41.5316
4.2	58.8	41.4793
4.2	59.2	41.3743
4.2	59.6	41.3558
4.2	60	41.3002
4.2	60.4	41.2387
4.2	60.8	41.1388
4.2	61.2	41.0939
4.2	61.6	41.0448
4.2	62	40.9435
4.2	62.4	40.85
4.2	62.8	40.8482
4.2	63.2	40.7917
4.2	63.6	40.7413
4.2	64	40.6673
4.2	64.4	40.6214
4.2	64.8	40.5742
4.2	65.2	40.478
4.2	65.6	40.4067
4.2	66	40.3711
4.2	66.4	40.3424
4.2	66.8	40.2559
4.2	67.2	40.267
4.2	67.6	40.1684
4.2	68	40.0916
4.2	68.4	40.0583
4.2	68.8	39.9704
4.2	69.2	39.9139
4.2	69.6	39.9024
3.8	-99.6	1178.84
3.8	-99.2	1228.17
3.8	-98.8	1281.47
3.8	-98.4	1340.23
3.8	-98	1404.35
3.8	-97.6	1472.95
3.8	-97.2	1548.24
3.8	-96.8	1631.03
3.8	-96.4	1719.48
3.8	-96	1817.11
3.8	-95.6	1920.94
3.8	-95.2	2034.78
3.8	-94.8	2160.64
3.8	-94.4	2299.14
3.8	-94	2451.32
3.8	-93.6	2617.85
3.8	-93.2	2801.85
3.8	-92.8	3005.37
3.8	-92.4	3231.16
3.8	-92	3481.85
3.8	-91.6	3762.04
3.8	-91.2	4064.78
3.8	-90.8	4403.43
3.8	-90.4	4775.99
3.8	-90	5186.21
3.8	-89.6	5633.92
3.8	-89.2	6115.33
3.8	-88.8	6622.64
3.8	-88.4	7162.65
3.8	-88	7712.48
3.8	-87.6	8261.39
3.8	-87.2	8803.14
3.8	-86.8	9304.28
3.8	-86.4	9741.63
3.8	-86	10116.2
3.8	-85.6	10401.9
3.8	-85.2	10600.4
3.8	-84.8	10704.6
3.8	-84.4	10713.2
3.8	-84	10624.7
3.8	-83.6	10446.9
3.8	-83.2	10180.1
3.8	-82.8	9833.77
3.8	-82.4	9397.27
3.8	-82	8901.2
3.8	-81.6	8348.72
3.8	-81.2	7766.74
3.8	-80.8	7175.4
3.8	-80.4	6597.67
3.8	-80	6044.71
3.8	-79.6	5524.2
3.8	-79.2	5043.59
3.8	-78.8	4600.96
3.8	-78.4	4202.68
3.8	-78	3839.72
3.8	-77.6	3519.36
3.8	-77.2	3226.85
3.8	-76.8	2966.09
3.8	-76.4	2733.33
3.8	-76	2520.38
3.8	-75.6	2329.97
3.8	-75.2	2159.72
3.8	-74.8	2005.74
3.8	-74.4	1865.74
3.8	-74	1740.28
3.8	-73.6	1625.83
3.8	-73.2	1521.09
3.8	-72.8	1427.96
3.8	-72.4	1341.6
3.8	-72	1262.46
3.8	-71.6	1190.3
3.8	-71.2	1123.06
3.8	-70.8	1062.68
3.8	-70.4	1006.88
3.8	-70	955.119
3.8	-69.6	906.989
3.8	-69.2	862.52
3.8	-68.8	821.405
3.8	-68.4	782.769
3.8	-68	746.966
3.8	-67.6	713.586
3.8	-67.2	682.474
3.8	-66.8	653.269
3.8	-66.4	625.868
3.8	-66	600.44
3.8	-65.6	576.314
3.8	-65.2	553.754
3.8	-64.8	532.527
3.8	-64.4	512.417
3.8	-64	493.789
3.8	-63.6	475.915
3.8	-63.2	459.077
3.8	-62.8	443.242
3.8	-62.4	427.984
3.8	-62	413.692
3.8	-61.6	400.207
3.8	-61.2	387.362
3.8	-60.8	375.051
3.8	-60.4	363.451
3.8	-60	352.327
3.8	-59.6	341.74
3.8	-59.2	331.771
3.8	-58.8	322.085
3.8	-58.4	312.82
3.8	-58	304.126
3.8	-57.6	295.575
3.8	-57.2	287.603
3.8	-56.8	279.964
3.8	-56.4	272.568
3.8	-56	265.532
3.8	-55.6	258.622
3.8	-55.2	252.306
3.8	-54.8	246.079
3.8	-54.4	240.051
3.8	-54	234.459
3.8	-53.6	228.878
3.8	-53.2	223.48
3.8	-52.8	218.371
3.8	-52.4	213.523
3.8	-52	208.81
3.8	-51.6	204.303
3.8	-51.2	199.925
3.8	-50.8	195.695
3.8	-50.4	191.58
3.8	-50	187.611
3.8	-49.6	183.887
3.8	-49.2	180.218
3.8	-48.8	176.651
3.8	-48.4	173.258
3.8	-48	169.995
3.8	-47.6	166.845
3.8	-47.2	163.76
3.8	-46.8	160.762
3.8	-46.4	157.865
3.8	-46	155.1
3.8	-45.6	152.406
3.8	-45.2	149.902
3.8	-44.8	147.283
3.8	-44.4	144.838
3.8	-44	142.5
3.8	-43.6	140.203
3.8	-43.2	137.96
3.8	-42.8	135.809
3.8	-42.4	133.76
3.8	-42	131.735
3.8	-41.6	129.725
3.8	-41.2	127.84
3.8	-40.8	126.002
3.8	-40.4	124.244
3.8	-40	122.449
3.8	-39.6	120.764
3.8	-39.2	119.137
3.8	-38.8	117.54
3.8	-38.4	115.951
3.8	-38	114.544
3.8	-37.6	112.996
3.8	-37.2	111.519
3.8	-36.8	110.179
3.8	-36.4	108.799
3.8	-36	107.445
3.8	-35.6	106.113
3.8	-35.2	104.88
3.8	-34.8	103.641
3.8	-34.4	102.496
3.8	-34	101.307
3.8	-33.6	100.068
3.8	-33.2	99.0551
3.8	-32.8	98.0708
3.8	-32.4	96.889
3.8	-32	95.8344
3.8	-31.6	94.909
3.8	-31.2	93.9118
3.8	-30.8	92.9433
3.8	-30.4	91.8906
3.8	-30	91.0799
3.8	-29.6	90.24
3.8	-29.2	89.4079
3.8	-28.8	88.512
3.8	-28.4	87.6564
3.8	-28	86.9156
3.8	-27.6	85.9896
3.8	-27.2	85.2673
3.8	-26.8	84.544
3.8	-26.4	83.7023
3.8	-26	83.1327
3.8	-25.6	82.4062
3.8	-25.2	81.6455
3.8	-24.8	80.9555
3.8	-24.4	80.3156
3.8	-24	79.7806
3.8	-23.6	79.118
3.8	-23.2	78.5572
3.8	-22.8	77.9306
3.8	-22.4	77.4318
3.8	-22	76.7312
3.8	-21.6	76.218
3.8	-21.2	75.877
3.8	-20.8	75.2486
3.8	-20.4	74.6378
3.8	-20	74.2726
3.8	-19.6	73.6553
3.8	-19.2	73.2204
3.8	-18.8	72.8391
3.8	-18.4	72.388
3.8	-18	72.0335
3.8	-17.6	71.5657
3.8	-17.2	71.1326
3.8	-16.8	70.6953
3.8	-16.4	70.3649
3.8	-16	69.991
3.8	-15.6	69.6712
3.8	-15.2	69.3251
3.8	-14.8	69.0146
3.8	-14.4	68.6944
3.8	-14	68.4237
3.8	-13.6	68.1266
3.8	-13.2	67.8124
3.8	-12.8	67.6255
3.8	-12.4	67.3927
3.8	-12	67.1761
3.8	-11.6	66.9577
3.8	-11.2	66.8004
3.8	-10.8	66.5787
3.8	-10.4	66.4089
3.8	-10	66.296
3.8	-9.6	66.0924
3.8	-9.2	65.9971
3.8	-8.8	65.8208
3.8	-8.4	65.6968
3.8	-8	65.6038
3.8	-7.6	65.4529
3.8	-7.2	65.403
3.8	-6.8	65.2813
3.8	-6.4	65.2391
3.8	-6	65.2308
3.8	-5.6	65.2067
3.8	-5.2	65.0156
3.8	-4.8	65.0304
3.8	-4.4	64.9467
3.8	-4	64.8125
3.8	-3.6	64.8162
3.8	-3.2	64.7574
3.8	-2.8	64.7079
3.8	-2.4	64.6533
3.8	-2	64.5862
3.8	-1.6	64.4908
3.8	-1.2	64.5057
3.8	-0.8	64.3664
3.8	-0.4	64.3372
3.8	0	64.2577
3.8	0.4	64.0994
3.8	0.8	64.1198
3.8	1.2	63.9981
3.8	1.6	63.8772
3.8	2	63.7407
3.8	2.4	63.5626
3.8	2.8	63.4515
3.8	3.2	63.3215
3.8	3.6	63.1516
3.8	4	63.0031
3.8	4.4	62.8708
3.8	4.8	62.6269
3.8	5.2	62.4626
3.8	5.6	62.2849
3.8	6	62.1466
3.8	6.4	61.9624
3.8	6.8	61.707
3.8	7.2	61.5316
3.8	7.6	61.3877
3.8	8	61.1374
3.8	8.4	60.943
3.8	8.8	60.751
3.8	9.2	60.5354
3.8	9.6	60.3355
3.8	10	60.0912
3.8	10.4	59.8918
3.8	10.8	59.6701
3.8	11.2	59.5054
3.8	11.6	59.2435
3.8	12	58.9894
3.8	12.4	58.8187
3.8	12.8	58.6132
3.8	13.2	58.424
3.8	13.6	58.1773
3.8	14	58.02
3.8	14.4	57.8192
3.8	14.8	57.5387
3.8	15.2	57.398
3.8	15.6	57.2463
3.8	16	57.0227
3.8	16.4	56.7914
3.8	16.8	56.5998
3.8	17.2	56.448
3.8	17.6	56.2101
3.8	18	56.013
3.8	18.4	55.8307
3.8	18.8	55.6669
3.8	19.2	55.4151
3.8	19.6	55.2861
3.8	20	55.0853
3.8	20.4	54.9279
3.8	20.8	54.7364
3.8	21.2	54.5096
3.8	21.6	54.2815
3.8	22	54.1732
3.8	22.4	53.9641
3.8	22.8	53.7771
3.8	23.2	53.5851
3.8	23.6	53.4495
3.8	24	53.2348
3.8	24.4	53.102
3.8	24.8	52.9738
3.8	25.2	52.7827
3.8	25.6	52.5703
3.8	26	52.4357
3.8	26.4	52.2834
3.8	26.8	52.1141
3.8	27.2	51.9109
3.8	27.6	51.8202
3.8	28	51.6069
3.8	28.4	51.4592
3.8	28.8	51.288
3.8	29.2	51.1636
3.8	29.6	51.0229
3.8	30	50.8406
3.8	30.4	50.6999
3.8	30.8	50.5537
3.8	31.2	50.3857
3.8	31.6	50.2381
3.8	32	50.1243
3.8	32.4	49.9776
3.8	32.8	49.7985
3.8	33.2	49.6948
3.8	33.6	49.5819
3.8	34	49.4274
3.8	34.4	49.2427
3.8	34.8	49.1789
3.8	35.2	49.0572
3.8	35.6	48.8739
3.8	36	48.7124
3.8	36.4	48.6458
3.8	36.8	48.4829
3.8	37.2	48.345
3.8	37.6	48.2205
3.8	38	48.065
3.8	38.4	47.9734
3.8	38.8	47.8291
3.8	39.2	47.6805
3.8	39.6	47.6347
3.8	40	47.532
3.8	40.4	47.3488
3.8	40.8	47.2858
3.8	41.2	47.159
3.8	41.6	47.0035
3.8	42	46.8901
3.8	42.4	46.7869
3.8	42.8	46.6805
3.8	43.2	46.5588
3.8	43.6	46.4372
3.8	44	46.3483
3.8	44.4	46.24
3.8	44.8	46.1035
3.8	45.2	46.0253
3.8	45.6	45.9022
3.8	46	45.793
3.8	46.4	45.6473
3.8	46.8	45.5816
3.8	47.2	45.4978
3.8	47.6	45.3919
3.8	48	45.3382
3.8	48.4	45.2507
3.8	48.8	45.1304
3.8	49.2	45.049
3.8	49.6	44.9624
3.8	50	44.8282
3.8	50.4	44.7051
3.8	50.8	44.601
3.8	51.2	44.5547
3.8	51.6	44.4627
3.8	52	44.3687
3.8	52.4	44.2632
3.8	52.8	44.1711
3.8	53.2	44.1031
3.8	53.6	44.0073
3.8	54	43.8893
3.8	54.4	43.7953
3.8	54.8	43.7005
3.8	55.2	43.6306
3.8	55.6	43.5459
3.8	56	43.4696
3.8	56.4	43.3544
3.8	56.8	43.2988
3.8	57.2	43.1882
3.8	57.6	43.1179
3.8	58	43.0304
3.8	58.4	42.9795
3.8	58.8	42.8791
3.8	59.2	42.8171
3.8	59.6	42.7635
3.8	60	42.7015
3.8	60.4	42.5974
3.8	60.8	42.527
3.8	61.2	42.4326
3.8	61.6	42.3766
3.8	62	42.2762
3.8	62.4	42.2244
3.8	62.8	42.1526
3.8	63.2	42.154
3.8	63.6	42.0305
3.8	64	41.8939
3.8	64.4	41.8574
3.8	64.8	41.8185
3.8	65.2	41.7357
3.8	65.6	41.633
3.8	66	41.5807
3.8	66.4	41.5265
3.8	66.8	41.4918
3.8	67.2	41.4085
3.8	67.6	41.2979
3.8	68	41.2822
3.8	68.4	41.223
3.8	68.8	41.1906
3.8	69.2	41.1142
3.8	69.6	40.9967
3.4	-99.6	563.656
3.4	-99.2	579.153
3.4	-98.8	595.934
3.4	-98.4	614.037
3.4	-98	633.254
3.4	-97.6	653.336
3.4	-97.2	674.914
3.4	-96.8	697.65
3.4	-96.4	721.053
3.4	-96	746.686
3.4	-95.6	773.891
3.4	-95.2	803.155
3.4	-94.8	833.525
3.4	-94.4	866.656
3.4	-94	901.268
3.4	-93.6	938.457
3.4	-93.2	978.11
3.4	-92.8	1020.05
3.4	-92.4	1065.81
3.4	-92	1114.71
3.4	-91.6	1167.87
3.4	-91.2	1223.38
3.4	-90.8	1284.62
3.4	-90.4	1350.37
3.4	-90	1419.55
3.4	-89.6	1495.94
3.4	-89.2	1579.05
3.4	-88.8	1667.21
3.4	-88.4	1764.36
3.4	-88	1870.21
3.4	-87.6	1985.06
3.4	-87.2	2111.82
3.4	-86.8	2250.92
3.4	-86.4	2400.32
3.4	-86	2564.36
3.4	-85.6	2745.66
3.4	-85.2	2943.52
3.4	-84.8	3163.28
3.4	-84.4	3401.04
3.4	-84	3665.61
3.4	-83.6	3951.64
3.4	-83.2	4265.58
3.4	-82.8	4605.41
3.4	-82.4	4975.52
3.4	-82	5369.65
3.4	-81.6	5784.07
3.4	-81.2	6217.81
3.4	-80.8	6660.08
3.4	-80.4	7102.73
3.4	-80	7520.62
3.4	-79.6	7913.15
3.4	-79.2	8262.57
3.4	-78.8	8550.45
3.4	-78.4	8779.97
3.4	-78	8923.29
3.4	-77.6	8989.95
3.4	-77.2	8978.51
3.4	-76.8	8874.56
3.4	-76.4	8694.72
3.4	-76	8438.34
3.4	-75.6	8107.5
3.4	-75.2	7721.26
3.4	-74.8	7292.69
3.4	-74.4	6833.39
3.4	-74	6364.64
3.4	-73.6	5886.9
3.4	-73.2	5439.44
3.4	-72.8	5008.44
3.4	-72.4	4603.96
3.4	-72	4226.53
3.4	-71.6	3882.88
3.4	-71.2	3565.47
3.4	-70.8	3281.37
3.4	-70.4	3023.19
3.4	-70	2788.39
3.4	-69.6	2576.73
3.4	-69.2	2384.7
3.4	-68.8	2212.24
3.4	-68.4	2055.76
3.4	-68	1913.59
3.4	-67.6	1785.28
3.4	-67.2	1666.09
3.4	-66.8	1560.1
3.4	-66.4	1463.45
3.4	-66	1374.07
3.4	-65.6	1292.26
3.4	-65.2	1218.01
3.4	-64.8	1149.64
3.4	-64.4	1086.57
3.4	-64	1028.57
3.4	-63.6	974.169
3.4	-63.2	924.633
3.4	-62.8	878.87
3.4	-62.4	836.022
3.4	-62	796.49
3.4	-61.6	759.567
3.4	-61.2	725.298
3.4	-60.8	693.216
3.4	-60.4	663.38
3.4	-60	635.281
3.4	-59.6	608.792
3.4	-59.2	584.425
3.4	-58.8	560.785
3.4	-58.4	538.953
3.4	-58	518.489
3.4	-57.6	499.305
3.4	-57.2	481.035
3.4	-56.8	463.849
3.4	-56.4	447.344
3.4	-56	431.815
3.4	-55.6	417.347
3.4	-55.2	403.402
3.4	-54.8	390.064
3.4	-54.4	377.651
3.4	-54	365.695
3.4	-53.6	354.493
3.4	-53.2	343.637
3.4	-52.8	333.352
3.4	-52.4	323.461
3.4	-52	314.16
3.4	-51.6	305.227
3.4	-51.2	296.689
3.4	-50.8	288.487
3.4	-50.4	280.784
3.4	-50	273.272
3.4	-49.6	266.073
3.4	-49.2	259.206
3.4	-48.8	252.716
3.4	-48.4	246.477
3.4	-48	240.492
3.4	-47.6	234.712
3.4	-47.2	229.141
3.4	-46.8	223.764
3.4	-46.4	218.657
3.4	-46	213.722
3.4	-45.6	209.027
3.4	-45.2	204.468
3.4	-44.8	200.024
3.4	-44.4	195.854
3.4	-44	191.722
3.4	-43.6	187.748
3.4	-43.2	183.975
3.4	-42.8	180.344
3.4	-42.4	176.804
3.4	-42	173.429
3.4	-41.6	170.168
3.4	-41.2	166.994
3.4	-40.8	163.914
3.4	-40.4	160.974
3.4	-40	158.147
3.4	-39.6	155.373
3.4	-39.2	152.729
3.4	-38.8	150.08
3.4	-38.4	147.551
3.4	-38	145.123
3.4	-37.6	142.815
3.4	-37.2	140.481
3.4	-36.8	138.334
3.4	-36.4	136.179
3.4	-36	134.059
3.4	-35.6	132.059
3.4	-35.2	130.066
3.4	-34.8	128.205
3.4	-34.4	126.383
3.4	-34	124.607
3.4	-33.6	122.836
3.4	-33.2	121.158
3.4	-32.8	119.431
3.4	-32.4	117.838
3.4	-32	116.296
3.4	-31.6	114.881
3.4	-31.2	113.39
3.4	-30.8	111.941
3.4	-30.4	110.565
3.4	-30	109.25
3.4	-29.6	107.887
3.4	-29.2	106.627
3.4	-28.8	105.337
3.4	-28.4	104.079
3.4	-28	102.898
3.4	-27.6	101.799
3.4	-27.2	100.693
3.4	-26.8	99.6353
3.4	-26.4	98.4646
3.4	-26	97.4082
3.4	-25.6	96.4114
3.4	-25.2	95.4911
3.4	-24.8	94.4476
3.4	-24.4	93.4583
3.4	-24	92.5638
3.4	-23.6	91.7225
3.4	-23.2	90.8924
3.4	-22.8	90.0701
3.4	-22.4	89.2644
3.4	-22	88.4722
3.4	-21.6	87.6731
3.4	-21.2	86.8979
3.4	-20.8	86.0946
3.4	-20.4	85.4278
3.4	-20	84.6222
3.4	-19.6	84.0544
3.4	-19.2	83.3797
3.4	-18.8	82.6643
3.4	-18.4	81.9842
3.4	-18	81.3886
3.4	-17.6	80.7815
3.4	-17.2	80.1888
3.4	-16.8	79.7237
3.4	-16.4	79.1171
3.4	-16	78.714
3.4	-15.6	78.2855
3.4	-15.2	77.4207
3.4	-14.8	77.1666
3.4	-14.4	76.821
3.4	-14	76.293
3.4	-13.6	75.8423
3.4	-13.2	75.461
3.4	-12.8	75.0487
3.4	-12.4	74.704
3.4	-12	74.2741
3.4	-11.6	74.0492
3.4	-11.2	73.6179
3.4	-10.8	73.5059
3.4	-10.4	73.0974
3.4	-10	72.8655
3.4	-9.6	72.6189
3.4	-9.2	72.3816
3.4	-8.8	72.2872
3.4	-8.4	72.091
3.4	-8	71.8924
3.4	-7.6	71.681
3.4	-7.2	71.525
3.4	-6.8	71.3381
3.4	-6.4	71.3524
3.4	-6	71.1664
3.4	-5.6	70.9896
3.4	-5.2	70.9753
3.4	-4.8	70.8934
3.4	-4.4	70.8022
3.4	-4	70.6472
3.4	-3.6	70.6476
3.4	-3.2	70.5792
3.4	-2.8	70.4598
3.4	-2.4	70.4894
3.4	-2	70.3705
3.4	-1.6	70.2303
3.4	-1.2	70.1525
3.4	-0.8	70.1095
3.4	-0.4	70.0003
3.4	0	69.9447
3.4	0.4	69.8832
3.4	0.8	69.7453
3.4	1.2	69.6356
3.4	1.6	69.5018
3.4	2	69.4121
3.4	2.4	69.2765
3.4	2.8	69.1423
3.4	3.2	68.9905
3.4	3.6	68.8554
3.4	4	68.6199
3.4	4.4	68.4769
3.4	4.8	68.2173
3.4	5.2	67.9971
3.4	5.6	67.8629
3.4	6	67.6348
3.4	6.4	67.4154
3.4	6.8	67.2271
3.4	7.2	66.9818
3.4	7.6	66.7347
3.4	8	66.4645
3.4	8.4	66.2526
3.4	8.8	65.9842
3.4	9.2	65.7472
3.4	9.6	65.4872
3.4	10	65.2761
3.4	10.4	65.0105
3.4	10.8	64.7712
3.4	11.2	64.4492
3.4	11.6	64.2331
3.4	12	63.9495
3.4	12.4	63.6756
3.4	12.8	63.484
3.4	13.2	63.1846
3.4	13.6	62.9333
3.4	14	62.6751
3.4	14.4	62.4669
3.4	14.8	62.2152
3.4	15.2	62.0134
3.4	15.6	61.7557
3.4	16	61.4405
3.4	16.4	61.2406
3.4	16.8	61.0417
3.4	17.2	60.7418
3.4	17.6	60.5771
3.4	18	60.274
3.4	18.4	60.0695
3.4	18.8	59.8654
3.4	19.2	59.5812
3.4	19.6	59.3628
3.4	20	59.1731
3.4	20.4	58.8982
3.4	20.8	58.6521
3.4	21.2	58.4378
[truncated: 11,569 more rows]

## Sheet: Fig1d
Vint (V)	VBG (V)	Rdrag (Ω)
5	-99.6	0.77545
5	-99.2	0.76304
5	-98.8	0.75105
5	-98.4	0.715
5	-98	0.70916
5	-97.6	0.68853
5	-97.2	0.67188
5	-96.8	0.6544
5	-96.4	0.61344
5	-96	0.58924
5	-95.6	0.59514
5	-95.2	0.56323
5	-94.8	0.5485
5	-94.4	0.52249
5	-94	0.51225
5	-93.6	0.49735
5	-93.2	0.46664
5	-92.8	0.47036
5	-92.4	0.45143
5	-92	0.43044
5	-91.6	0.43458
5	-91.2	0.42186
5	-90.8	0.39724
5	-90.4	0.39104
5	-90	0.39078
5	-89.6	0.37144
5	-89.2	0.36947
5	-88.8	0.37154
5	-88.4	0.3553
5	-88	0.33203
5	-87.6	0.32299
5	-87.2	0.32402
5	-86.8	0.32402
5	-86.4	0.30696
5	-86	0.29925
5	-85.6	0.30277
5	-85.2	0.29015
5	-84.8	0.28069
5	-84.4	0.29232
5	-84	0.263
5	-83.6	0.26331
5	-83.2	0.25612
5	-82.8	0.25478
5	-82.4	0.27334
5	-82	0.2434
5	-81.6	0.23197
5	-81.2	0.24511
5	-80.8	0.24149
5	-80.4	0.23849
5	-80	0.22784
5	-79.6	0.23813
5	-79.2	0.21672
5	-78.8	0.22117
5	-78.4	0.22132
5	-78	0.21646
5	-77.6	0.21289
5	-77.2	0.20214
5	-76.8	0.19293
5	-76.4	0.19526
5	-76	0.18321
5	-75.6	0.18507
5	-75.2	0.18182
5	-74.8	0.17758
5	-74.4	0.17737
5	-74	0.18895
5	-73.6	0.19071
5	-73.2	0.17649
5	-72.8	0.16418
5	-72.4	0.16935
5	-72	0.17173
5	-71.6	0.16713
5	-71.2	0.14122
5	-70.8	0.15508
5	-70.4	0.15575
5	-70	0.17458
5	-69.6	0.15875
5	-69.2	0.15208
5	-68.8	0.15451
5	-68.4	0.14996
5	-68	0.14153
5	-67.6	0.14474
5	-67.2	0.13388
5	-66.8	0.13812
5	-66.4	0.12917
5	-66	0.14205
5	-65.6	0.13905
5	-65.2	0.1286
5	-64.8	0.13021
5	-64.4	0.10927
5	-64	0.14438
5	-63.6	0.12669
5	-63.2	0.12126
5	-62.8	0.11821
5	-62.4	0.12054
5	-62	0.11035
5	-61.6	0.12416
5	-61.2	0.10885
5	-60.8	0.11821
5	-60.4	0.12881
5	-60	0.11888
5	-59.6	0.12504
5	-59.2	0.12695
5	-58.8	0.09453
5	-58.4	0.09644
5	-58	0.10389
5	-57.6	0.10058
5	-57.2	0.10673
5	-56.8	0.10115
5	-56.4	0.09618
5	-56	0.0952
5	-55.6	0.10399
5	-55.2	0.1119
5	-54.8	0.10461
5	-54.4	0.10746
5	-54	0.11625
5	-53.6	0.09934
5	-53.2	0.0937
5	-52.8	0.09453
5	-52.4	0.09551
5	-52	0.1059
5	-51.6	0.09903
5	-51.2	0.10663
5	-50.8	0.10409
5	-50.4	0.10084
5	-50	0.11376
5	-49.6	0.08517
5	-49.2	0.08119
5	-48.8	0.09303
5	-48.4	0.06862
5	-48	0.10554
5	-47.6	0.09365
5	-47.2	0.08408
5	-46.8	0.11547
5	-46.4	0.0876
5	-46	0.10394
5	-45.6	0.08636
5	-45.2	0.07855
5	-44.8	0.10053
5	-44.4	0.09173
5	-44	0.0952
5	-43.6	0.07994
5	-43.2	0.08439
5	-42.8	0.09494
5	-42.4	0.07622
5	-42	0.09086
5	-41.6	0.07808
5	-41.2	0.10435
5	-40.8	0.07777
5	-40.4	0.06531
5	-40	0.07457
5	-39.6	0.10156
5	-39.2	0.08641
5	-38.8	0.0695
5	-38.4	0.12168
5	-38	0.07881
5	-37.6	0.08806
5	-37.2	0.06774
5	-36.8	0.07338
5	-36.4	0.06169
5	-36	0.07229
5	-35.6	0.06764
5	-35.2	0.05471
5	-34.8	0.06862
5	-34.4	0.0725
5	-34	0.06278
5	-33.6	0.07281
5	-33.2	0.06748
5	-32.8	0.07415
5	-32.4	0.07214
5	-32	0.0666
5	-31.6	0.05031
5	-31.2	0.06143
5	-30.8	0.04711
5	-30.4	0.07679
5	-30	0.03377
5	-29.6	0.06045
5	-29.2	0.07064
5	-28.8	0.04985
5	-28.4	0.03946
5	-28	0.04752
5	-27.6	0.03992
5	-27.2	0.03604
5	-26.8	0.06598
5	-26.4	0.05047
5	-26	0.03278
5	-25.6	0.04664
5	-25.2	0.06029
5	-24.8	0.04064
5	-24.4	0.05099
5	-24	0.04571
5	-23.6	0.04297
5	-23.2	0.05264
5	-22.8	0.03682
5	-22.4	0.02136
5	-22	0.08367
5	-21.6	0.05285
5	-21.2	0.04902
5	-20.8	0.05523
5	-20.4	0.0014
5	-20	0.05218
5	-19.6	0.08175
5	-19.2	0.03273
5	-18.8	0.04199
5	-18.4	0.03796
5	-18	0.04747
5	-17.6	0.03377
5	-17.2	0.03247
5	-16.8	0.03263
5	-16.4	0.04742
5	-16	0.06748
5	-15.6	0.02286
5	-15.2	0.03992
5	-14.8	0.04628
5	-14.4	0.01686
5	-14	0.02162
5	-13.6	0.03413
5	-13.2	0.00848
5	-12.8	0.0107
5	-12.4	0.00657
5	-12	0.07276
5	-11.6	0.04773
5	-11.2	0.05243
5	-10.8	0.02544
5	-10.4	0.03278
5	-10	0.0545
5	-9.6	0.05647
5	-9.2	0.03315
5	-8.8	0.07069
5	-8.4	-0.01831
5	-8	0.04421
5	-7.6	0.0107
5	-7.2	0.10844
5	-6.8	0.04245
5	-6.4	-0.04297
5	-6	0.04897
5	-5.6	-0.00683
5	-5.2	0.04597
5	-4.8	-0.00802
5	-4.4	0.00983
5	-4	0.04308
5	-3.6	0.07596
5	-3.2	0.02203
5	-2.8	0.06624
5	-2.4	0.01913
5	-2	0.05595
5	-1.6	0.09592
5	-1.2	0.04701
5	-0.8	0.09065
5	-0.4	0.03423
5	0	0.08356
5	0.4	0.0619
5	0.8	0.07038
5	1.2	0.06945
5	1.6	0.04711
5	2	0.0604
5	2.4	0.0348
5	2.8	0.05062
5	3.2	0.05233
5	3.6	0.06035
5	4	0.03827
5	4.4	0.06102
5	4.8	0.05714
5	5.2	0.06273
5	5.6	0.05973
5	6	0.07007
5	6.4	0.05823
5	6.8	0.08134
5	7.2	0.05352
5	7.6	0.01872
5	8	0.03646
5	8.4	0.05487
5	8.8	0.05316
5	9.2	0.04995
5	9.6	0.07255
5	10	0.03594
5	10.4	0.04209
5	10.8	0.04432
5	11.2	0.06583
5	11.6	0.06159
5	12	0.05838
5	12.4	0.06355
5	12.8	0.02875
5	13.2	0.03651
5	13.6	0.05042
5	14	0.04101
5	14.4	0.04085
5	14.8	0.03992
5	15.2	0.05998
5	15.6	0.04944
5	16	0.05838
5	16.4	0.06784
5	16.8	0.05874
5	17.2	0.04401
5	17.6	0.05905
5	18	0.03553
5	18.4	0.03082
5	18.8	0.0438
5	19.2	0.04975
5	19.6	0.03765
5	20	0.04406
5	20.4	0.04845
5	20.8	0.04339
5	21.2	0.05885
5	21.6	0.05978
5	22	0.06541
5	22.4	0.03894
5	22.8	0.05693
5	23.2	0.0787
5	23.6	0.05114
5	24	0.03454
5	24.4	0.0437
5	24.8	0.03242
5	25.2	0.0438
5	25.6	0.0363
5	26	0.03935
5	26.4	0.0378
5	26.8	0.04675
5	27.2	0.04556
5	27.6	0.04664
5	28	0.06986
5	28.4	0.04323
5	28.8	0.05507
5	29.2	0.05249
5	29.6	0.02565
5	30	0.03832
5	30.4	0.05388
5	30.8	0.05161
5	31.2	0.05161
5	31.6	0.04582
5	32	0.04463
5	32.4	0.04282
5	32.8	0.04695
5	33.2	0.03728
5	33.6	0.02467
5	34	0.04494
5	34.4	0.03309
5	34.8	0.0407
5	35.2	0.04023
5	35.6	0.04592
5	36	0.04054
5	36.4	0.05135
5	36.8	0.03087
5	37.2	0.0575
5	37.6	0.04613
5	38	0.04349
5	38.4	0.03092
5	38.8	0.03599
5	39.2	0.04359
5	39.6	0.03232
5	40	0.05259
5	40.4	0.03061
5	40.8	0.05212
5	41.2	0.0364
5	41.6	0.04339
5	42	0.03915
5	42.4	0.04757
5	42.8	0.03961
5	43.2	0.04933
5	43.6	0.03356
5	44	0.0559
5	44.4	0.04892
5	44.8	0.05502
5	45.2	0.04318
5	45.6	0.05802
5	46	0.03894
5	46.4	0.05187
5	46.8	0.02746
5	47.2	0.04514
5	47.6	0.05776
5	48	0.03718
5	48.4	0.05455
5	48.8	0.02901
5	49.2	0.03682
5	49.6	0.02632
5	50	0.0437
5	50.4	0.02239
5	50.8	0.03154
5	51.2	0.00253
5	51.6	0.02901
5	52	0.03284
5	52.4	0.03397
5	52.8	0.02844
5	53.2	0.0544
5	53.6	0.05755
5	54	0.03377
5	54.4	0.05585
5	54.8	0.03765
5	55.2	0.03599
5	55.6	0.03315
5	56	0.03077
5	56.4	0.03087
5	56.8	0.02549
5	57.2	0.05724
5	57.6	0.01748
5	58	0.03904
5	58.4	0.01898
5	58.8	0.04127
5	59.2	0.02368
5	59.6	0.03625
5	60	0.02829
5	60.4	0.03604
5	60.8	0.01541
5	61.2	0.04271
5	61.6	0.03956
5	62	0.02948
5	62.4	0.03191
5	62.8	0.04638
5	63.2	0.04256
5	63.6	0.07115
5	64	0.0377
5	64.4	0.03946
5	64.8	0.02761
5	65.2	0.03206
5	65.6	0.03883
5	66	0.04468
5	66.4	0.03977
5	66.8	0.02389
5	67.2	0.00988
5	67.6	0.0468
5	68	0.03692
5	68.4	0.03987
5	68.8	0.03232
5	69.2	0.06247
5	69.6	0.03284
4.6	-99.6	0.01231
4.6	-99.2	0.09825
4.6	-98.8	0.17302
4.6	-98.4	0.26238
4.6	-98	0.33772
4.6	-97.6	0.40303
4.6	-97.2	0.50495
4.6	-96.8	0.56814
4.6	-96.4	0.63749
4.6	-96	0.69892
4.6	-95.6	0.76718
4.6	-95.2	0.82013
4.6	-94.8	0.83223
4.6	-94.4	0.86403
4.6	-94	0.8918
4.6	-93.6	0.8994
4.6	-93.2	0.88493
4.6	-92.8	0.87794
4.6	-92.4	0.84718
4.6	-92	0.83451
4.6	-91.6	0.80291
4.6	-91.2	0.77442
4.6	-90.8	0.73957
4.6	-90.4	0.73383
4.6	-90	0.70601
4.6	-89.6	0.65383
4.6	-89.2	0.6349
4.6	-88.8	0.62461
4.6	-88.4	0.58831
4.6	-88	0.58242
4.6	-87.6	0.55532
4.6	-87.2	0.55031
4.6	-86.8	0.52528
4.6	-86.4	0.50118
4.6	-86	0.48044
4.6	-85.6	0.48846
4.6	-85.2	0.46157
4.6	-84.8	0.46074
4.6	-84.4	0.43489
4.6	-84	0.42284
4.6	-83.6	0.41053
4.6	-83.2	0.40924
4.6	-82.8	0.38773
4.6	-82.4	0.38007
4.6	-82	0.37697
4.6	-81.6	0.3672
4.6	-81.2	0.36834
4.6	-80.8	0.35055
4.6	-80.4	0.34103
4.6	-80	0.33545
4.6	-79.6	0.34398
4.6	-79.2	0.32671
4.6	-78.8	0.32624
4.6	-78.4	0.30178
4.6	-78	0.30277
4.6	-77.6	0.28767
4.6	-77.2	0.30065
4.6	-76.8	0.29377
4.6	-76.4	0.28834
4.6	-76	0.27009
4.6	-75.6	0.25488
4.6	-75.2	0.25778
4.6	-74.8	0.26264
4.6	-74.4	0.24635
4.6	-74	0.26978
4.6	-73.6	0.26569
4.6	-73.2	0.25059
4.6	-72.8	0.24227
4.6	-72.4	0.23642
4.6	-72	0.2388
4.6	-71.6	0.22655
4.6	-71.2	0.23978
4.6	-70.8	0.23968
4.6	-70.4	0.21481
4.6	-70	0.22613
4.6	-69.6	0.21739
4.6	-69.2	0.20483
4.6	-68.8	0.19035
4.6	-68.4	0.1979
4.6	-68	0.20095
4.6	-67.6	0.20462
4.6	-67.2	0.1874
4.6	-66.8	0.19283
4.6	-66.4	0.20369
4.6	-66	0.19159
4.6	-65.6	0.18802
4.6	-65.2	0.17458
4.6	-64.8	0.17473
4.6	-64.4	0.18833
4.6	-64	0.17706
4.6	-63.6	0.16971
4.6	-63.2	0.16982
4.6	-62.8	0.17608
4.6	-62.4	0.16491
4.6	-62	0.16418
4.6	-61.6	0.17633
4.6	-61.2	0.16946
4.6	-60.8	0.17344
4.6	-60.4	0.15213
4.6	-60	0.14572
4.6	-59.6	0.15301
4.6	-59.2	0.14479
4.6	-58.8	0.16341
4.6	-58.4	0.16434
4.6	-58	0.13703
4.6	-57.6	0.15058
4.6	-57.2	0.15632
4.6	-56.8	0.1451
4.6	-56.4	0.13678
4.6	-56	0.15141
4.6	-55.6	0.1452
4.6	-55.2	0.14505
4.6	-54.8	0.13967
4.6	-54.4	0.14324
4.6	-54	0.14386
4.6	-53.6	0.1344
4.6	-53.2	0.1088
4.6	-52.8	0.118
4.6	-52.4	0.14308
4.6	-52	0.1359
4.6	-51.6	0.14034
4.6	-51.2	0.12633
4.6	-50.8	0.12033
4.6	-50.4	0.13202
4.6	-50	0.11263
4.6	-49.6	0.11035
4.6	-49.2	0.11733
4.6	-48.8	0.11935
4.6	-48.4	0.11681
4.6	-48	0.12473
4.6	-47.6	0.10559
4.6	-47.2	0.10937
4.6	-46.8	0.11868
4.6	-46.4	0.11671
4.6	-46	0.10802
4.6	-45.6	0.10642
4.6	-45.2	0.07012
4.6	-44.8	0.09137
4.6	-44.4	0.11257
4.6	-44	0.10265
4.6	-43.6	0.10746
4.6	-43.2	0.10223
4.6	-42.8	0.10616
4.6	-42.4	0.11351
4.6	-42	0.12214
4.6	-41.6	0.08812
4.6	-41.2	0.0937
4.6	-40.8	0.08713
4.6	-40.4	0.0846
4.6	-40	0.10358
4.6	-39.6	0.09137
4.6	-39.2	0.07421
4.6	-38.8	0.08744
4.6	-38.4	0.08744
4.6	-38	0.10223
4.6	-37.6	0.09711
4.6	-37.2	0.09706
4.6	-36.8	0.08874
4.6	-36.4	0.09939
4.6	-36	0.09256
4.6	-35.6	0.10926
4.6	-35.2	0.09908
4.6	-34.8	0.08941
4.6	-34.4	0.08755
4.6	-34	0.07798
4.6	-33.6	0.07989
4.6	-33.2	0.08274
4.6	-32.8	0.06898
4.6	-32.4	0.07896
4.6	-32	0.07948
4.6	-31.6	0.07633
4.6	-31.2	0.08884
4.6	-30.8	0.06934
4.6	-30.4	0.05719
4.6	-30	0.05988
4.6	-29.6	0.07881
4.6	-29.2	0.09075
4.6	-28.8	0.07648
4.6	-28.4	0.08103
4.6	-28	0.06712
4.6	-27.6	0.05864
4.6	-27.2	0.08579
4.6	-26.8	0.07782
4.6	-26.4	0.04437
4.6	-26	0.05466
4.6	-25.6	0.0588
4.6	-25.2	0.04757
4.6	-24.8	0.065
4.6	-24.4	0.05497
4.6	-24	0.0741
4.6	-23.6	0.06521
4.6	-23.2	0.04907
4.6	-22.8	0.04949
4.6	-22.4	0.04359
4.6	-22	0.07808
4.6	-21.6	0.0771
4.6	-21.2	0.04954
4.6	-20.8	0.07565
4.6	-20.4	0.08031
4.6	-20	0.0212
4.6	-19.6	0.04607
4.6	-19.2	0.04204
4.6	-18.8	0.06159
4.6	-18.4	0.05254
4.6	-18	0.04876
4.6	-17.6	0.03961
4.6	-17.2	0.05373
4.6	-16.8	0.06976
4.6	-16.4	0.05978
4.6	-16	0.04261
4.6	-15.6	5.17108e-05
4.6	-15.2	0.08868
4.6	-14.8	0.04669
4.6	-14.4	0.05528
4.6	-14	0.03506
4.6	-13.6	0.065
4.6	-13.2	0.0302
4.6	-12.8	0.05254
4.6	-12.4	-0.01184
4.6	-12	0.02761
4.6	-11.6	0.07307
4.6	-11.2	0.03832
4.6	-10.8	0.10746
4.6	-10.4	0.03423
4.6	-10	0.03821
4.6	-9.6	0.04447
4.6	-9.2	0.01163
4.6	-8.8	0.04385
4.6	-8.4	0.03977
4.6	-8	-0.00403
4.6	-7.6	0.05052
4.6	-7.2	0.0439
4.6	-6.8	0.06035
4.6	-6.4	0.04644
4.6	-6	-0.01293
4.6	-5.6	0.03372
4.6	-5.2	0.03092
4.6	-4.8	0.02327
4.6	-4.4	0.12685
4.6	-4	0.03553
4.6	-3.6	0.04478
4.6	-3.2	0.08682
4.6	-2.8	0.06872
4.6	-2.4	0.0619
4.6	-2	0.09851
4.6	-1.6	0.04033
4.6	-1.2	0.07358
4.6	-0.8	0.08
4.6	-0.4	0.04018
4.6	0	0.08207
4.6	0.4	-0.00579
4.6	0.8	0.02467
4.6	1.2	0.06976
4.6	1.6	0.03315
4.6	2	0.06996
4.6	2.4	0.09396
4.6	2.8	0.07446
4.6	3.2	0.07514
4.6	3.6	0.0393
4.6	4	0.04628
4.6	4.4	0.07234
4.6	4.8	0.09055
4.6	5.2	0.05761
4.6	5.6	0.09334
4.6	6	0.03382
4.6	6.4	0.08987
4.6	6.8	0.06459
4.6	7.2	0.0771
4.6	7.6	0.07188
4.6	8	0.06707
4.6	8.4	0.07136
4.6	8.8	0.05678
4.6	9.2	0.0816
4.6	9.6	0.06929
4.6	10	0.08486
4.6	10.4	0.07576
4.6	10.8	0.0771
4.6	11.2	0.05419
4.6	11.6	0.0378
4.6	12	0.04788
4.6	12.4	0.06541
4.6	12.8	0.05404
4.6	13.2	0.06241
4.6	13.6	0.07591
4.6	14	0.06671
4.6	14.4	0.0756
4.6	14.8	0.06009
4.6	15.2	0.07017
4.6	15.6	0.04535
4.6	16	0.06086
4.6	16.4	0.062
4.6	16.8	0.06676
4.6	17.2	0.05109
4.6	17.6	0.04406
4.6	18	0.07146
4.6	18.4	0.04669
4.6	18.8	0.05114
4.6	19.2	0.03542
4.6	19.6	0.06154
4.6	20	0.07483
4.6	20.4	0.01934
4.6	20.8	0.03677
4.6	21.2	0.06867
4.6	21.6	0.06262
4.6	22	0.05507
4.6	22.4	0.04142
4.6	22.8	0.04163
4.6	23.2	0.07876
4.6	23.6	0.04959
4.6	24	0.04742
4.6	24.4	0.06288
4.6	24.8	0.03284
4.6	25.2	0.05228
4.6	25.6	0.03351
4.6	26	0.04163
4.6	26.4	0.04799
4.6	26.8	0.05802
4.6	27.2	0.05187
4.6	27.6	0.05171
4.6	28	0.05688
4.6	28.4	0.04571
4.6	28.8	0.06376
4.6	29.2	0.03992
4.6	29.6	0.04432
4.6	30	0.03708
4.6	30.4	0.0452
4.6	30.8	0.03284
4.6	31.2	0.03987
4.6	31.6	0.053
4.6	32	0.03403
4.6	32.4	0.03775
4.6	32.8	0.04504
4.6	33.2	0.04318
4.6	33.6	0.0483
4.6	34	0.04121
4.6	34.4	0.05337
4.6	34.8	0.05424
4.6	35.2	0.05104
4.6	35.6	0.04333
4.6	36	0.04494
4.6	36.4	0.03097
4.6	36.8	0.05848
4.6	37.2	0.04008
4.6	37.6	0.05337
4.6	38	0.0362
4.6	38.4	0.06759
4.6	38.8	0.05502
4.6	39.2	0.03651
4.6	39.6	0.03987
4.6	40	0.05533
4.6	40.4	0.05269
4.6	40.8	0.05817
4.6	41.2	0.06541
4.6	41.6	0.04861
4.6	42	0.06009
4.6	42.4	0.04023
4.6	42.8	0.02994
4.6	43.2	0.04835
4.6	43.6	0.04566
4.6	44	0.04721
4.6	44.4	0.04008
4.6	44.8	0.03837
4.6	45.2	0.03651
4.6	45.6	0.05233
4.6	46	0.03341
4.6	46.4	0.06283
4.6	46.8	0.02074
4.6	47.2	0.03201
4.6	47.6	0.05797
4.6	48	0.02782
4.6	48.4	0.03227
4.6	48.8	0.04318
4.6	49.2	0.07053
4.6	49.6	0.05543
4.6	50	0.05921
4.6	50.4	0.01887
4.6	50.8	0.02436
4.6	51.2	0.05026
4.6	51.6	0.04633
4.6	52	0.0528
4.6	52.4	0.05052
4.6	52.8	0.03444
4.6	53.2	0.04225
4.6	53.6	0.04468
4.6	54	0.06278
4.6	54.4	0.05605
4.6	54.8	0.03051
4.6	55.2	0.04607
4.6	55.6	0.06655
4.6	56	0.05455
4.6	56.4	0.04633
4.6	56.8	0.00905
4.6	57.2	0.02746
4.6	57.6	0.04607
4.6	58	0.0256
4.6	58.4	0.0543
4.6	58.8	0.03299
4.6	59.2	0.04132
4.6	59.6	0.03309
4.6	60	0.03806
4.6	60.4	0.03671
4.6	60.8	0.03713
4.6	61.2	0.02808
4.6	61.6	0.03558
4.6	62	0.0347
4.6	62.4	0.02689
4.6	62.8	0.02405
4.6	63.2	0.04944
4.6	63.6	0.04654
4.6	64	0.03749
4.6	64.4	0.03997
4.6	64.8	0.03449
4.6	65.2	0.04773
4.6	65.6	0.0364
4.6	66	0.02492
4.6	66.4	0.05518
4.6	66.8	0.03134
4.6	67.2	0.04483
4.6	67.6	0.03977
4.6	68	0.04209
4.6	68.4	0.02265
4.6	68.8	0.02637
4.6	69.2	0.0454
4.6	69.6	0.03842
4.2	-99.6	-0.98499
4.2	-99.2	-0.96746
4.2	-98.8	-0.97981
4.2	-98.4	-0.95629
4.2	-98	-0.9537
4.2	-97.6	-0.95391
4.2	-97.2	-0.93772
4.2	-96.8	-0.89516
4.2	-96.4	-0.8586
4.2	-96	-0.80689
4.2	-95.6	-0.75782
4.2	-95.2	-0.68806
4.2	-94.8	-0.61479
4.2	-94.4	-0.53474
4.2	-94	-0.44792
4.2	-93.6	-0.35318
4.2	-93.2	-0.24594
4.2	-92.8	-0.13874
4.2	-92.4	-0.01169
4.2	-92	0.09179
4.2	-91.6	0.19676
4.2	-91.2	0.29646
4.2	-90.8	0.40448
4.2	-90.4	0.48251
4.2	-90	0.57771
4.2	-89.6	0.67715
4.2	-89.2	0.73496
4.2	-88.8	0.7981
4.2	-88.4	0.86895
4.2	-88	0.89878
4.2	-87.6	0.94584
4.2	-87.2	0.94574
4.2	-86.8	0.96342
4.2	-86.4	0.95649
4.2	-86	0.94506
4.2	-85.6	0.92697
4.2	-85.2	0.89708
4.2	-84.8	0.86719
4.2	-84.4	0.83632
4.2	-84	0.79624
4.2	-83.6	0.78554
4.2	-83.2	0.72907
4.2	-82.8	0.70347
4.2	-82.4	0.69644
4.2	-82	0.68005
4.2	-81.6	0.64742
4.2	-81.2	0.6151
4.2	-80.8	0.61412
4.2	-80.4	0.5925
4.2	-80	0.56856
4.2	-79.6	0.54984
4.2	-79.2	0.55005
4.2	-78.8	0.51871
4.2	-78.4	0.51271
4.2	-78	0.49172
4.2	-77.6	0.48608
4.2	-77.2	0.47202
4.2	-76.8	0.46116
4.2	-76.4	0.43654
4.2	-76	0.43711
4.2	-75.6	0.44135
4.2	-75.2	0.41022
4.2	-74.8	0.40536
4.2	-74.4	0.39559
4.2	-74	0.39579
4.2	-73.6	0.37904
4.2	-73.2	0.37485
4.2	-72.8	0.37149
4.2	-72.4	0.35851
4.2	-72	0.35624
4.2	-71.6	0.35215
4.2	-71.2	0.3432
4.2	-70.8	0.33958
4.2	-70.4	0.3203
4.2	-70	0.32707
4.2	-69.6	0.32707
4.2	-69.2	0.3234
4.2	-68.8	0.29941
4.2	-68.4	0.31011
4.2	-68	0.31414
4.2	-67.6	0.29211
4.2	-67.2	0.28715
4.2	-66.8	0.28513
4.2	-66.4	0.27427
4.2	-66	0.27722
4.2	-65.6	0.29703
4.2	-65.2	0.26766
4.2	-64.8	0.28358
4.2	-64.4	0.26378
4.2	-64	0.25602
4.2	-63.6	0.24981
4.2	-63.2	0.26254
4.2	-62.8	0.24175
4.2	-62.4	0.24635
4.2	-62	0.23254
4.2	-61.6	0.22396
4.2	-61.2	0.24547
4.2	-60.8	0.20643
4.2	-60.4	0.22215
4.2	-60	0.22505
4.2	-59.6	0.22499
4.2	-59.2	0.22711
4.2	-58.8	0.22608
4.2	-58.4	0.21248
4.2	-58	0.2328
4.2	-57.6	0.22954
4.2	-57.2	0.20674
4.2	-56.8	0.2266
4.2	-56.4	0.20193
4.2	-56	0.19991
4.2	-55.6	0.20627
4.2	-55.2	0.20038
4.2	-54.8	0.20095
4.2	-54.4	0.207
4.2	-54	0.20131
4.2	-53.6	0.1979
4.2	-53.2	0.19355
4.2	-52.8	0.18331
4.2	-52.4	0.17876
4.2	-52	0.18373
4.2	-51.6	0.19014
4.2	-51.2	0.17851
4.2	-50.8	0.17142
4.2	-50.4	0.15508
4.2	-50	0.18683
4.2	-49.6	0.16072
4.2	-49.2	0.16625
4.2	-48.8	0.18476
4.2	-48.4	0.14743
4.2	-48	0.17396
4.2	-47.6	0.18099
4.2	-47.2	0.15813
4.2	-46.8	0.16129
4.2	-46.4	0.16279
4.2	-46	0.15565
4.2	-45.6	0.16889
4.2	-45.2	0.15611
4.2	-44.8	0.14794
4.2	-44.4	0.1344
4.2	-44	0.16206
4.2	-43.6	0.15839
4.2	-43.2	0.13109
4.2	-42.8	0.14138
4.2	-42.4	0.13083
4.2	-42	0.13331
4.2	-41.6	0.13533
4.2	-41.2	0.17509
4.2	-40.8	0.14102
4.2	-40.4	0.13972
4.2	-40	0.14582
4.2	-39.6	0.13765
4.2	-39.2	0.13688
4.2	-38.8	0.13078
4.2	-38.4	0.14174
4.2	-38	0.11899
4.2	-37.6	0.14505
4.2	-37.2	0.13703
4.2	-36.8	0.11201
4.2	-36.4	0.10446
4.2	-36	0.11418
4.2	-35.6	0.11914
4.2	-35.2	0.12871
4.2	-34.8	0.11754
4.2	-34.4	0.12592
4.2	-34	0.11516
4.2	-33.6	0.09639
4.2	-33.2	0.10451
4.2	-32.8	0.10192
4.2	-32.4	0.12711
4.2	-32	0.10146
4.2	-31.6	0.10115
4.2	-31.2	0.1118
4.2	-30.8	0.11723
4.2	-30.4	0.09582
4.2	-30	0.10782
4.2	-29.6	0.09504
4.2	-29.2	0.08377
4.2	-28.8	0.11309
4.2	-28.4	0.09872
4.2	-28	0.09463
4.2	-27.6	0.08589
4.2	-27.2	0.08491
4.2	-26.8	0.07452
4.2	-26.4	0.09598
4.2	-26	0.10384
4.2	-25.6	0.07808
4.2	-25.2	0.08868
4.2	-24.8	0.07245
4.2	-24.4	0.0862
4.2	-24	0.08936
4.2	-23.6	0.10053
4.2	-23.2	0.08796
4.2	-22.8	0.06847
4.2	-22.4	0.09024
4.2	-22	0.08703
4.2	-21.6	0.0966
4.2	-21.2	0.08398
4.2	-20.8	0.09727
4.2	-20.4	0.04235
4.2	-20	0.0636
4.2	-19.6	0.04499
4.2	-19.2	0.0694
4.2	-18.8	0.07493
4.2	-18.4	0.07664
4.2	-18	0.06691
4.2	-17.6	0.07389
4.2	-17.2	0.06578
4.2	-16.8	0.07617
4.2	-16.4	0.0515
4.2	-16	0.07545
4.2	-15.6	0.04768
4.2	-15.2	0.06107
4.2	-14.8	0.04907
4.2	-14.4	0.07855
4.2	-14	0.03723
4.2	-13.6	0.04819
4.2	-13.2	0.05466
4.2	-12.8	0.04209
4.2	-12.4	0.08874
4.2	-12	0.05078
4.2	-11.6	0.05786
4.2	-11.2	0.11738
4.2	-10.8	0.05631
4.2	-10.4	0.0273
4.2	-10	0.05026
4.2	-9.6	0.06919
4.2	-9.2	0.0982
4.2	-8.8	0.04039
4.2	-8.4	-0.00517
4.2	-8	0.08341
4.2	-7.6	0.06278
4.2	-7.2	0.02746
4.2	-6.8	0.06066
4.2	-6.4	0.03749
4.2	-6	0.06381
4.2	-5.6	0.07121
4.2	-5.2	0.07731
4.2	-4.8	0.08827
4.2	-4.4	0.07472
4.2	-4	0.08584
4.2	-3.6	0.07296
4.2	-3.2	0.09432
4.2	-2.8	0.05714
4.2	-2.4	0.05549
4.2	-2	0.03837
4.2	-1.6	0.06888
4.2	-1.2	0.07658
4.2	-0.8	0.06422
4.2	-0.4	0.10911
4.2	0	0.08331
4.2	0.4	0.05931
4.2	0.8	0.04545
4.2	1.2	0.08956
4.2	1.6	0.05636
4.2	2	0.09866
4.2	2.4	0.07994
4.2	2.8	0.07617
4.2	3.2	0.07152
4.2	3.6	0.06903
4.2	4	0.06795
4.2	4.4	0.05047
4.2	4.8	0.05497
4.2	5.2	0.07534
4.2	5.6	0.07028
4.2	6	0.05719
4.2	6.4	0.06536
4.2	6.8	0.06366
4.2	7.2	0.09701
4.2	7.6	0.04861
4.2	8	0.08517
4.2	8.4	0.07633
4.2	8.8	0.06893
4.2	9.2	0.06547
4.2	9.6	0.05828
4.2	10	0.07126
4.2	10.4	0.04245
4.2	10.8	0.05466
4.2	11.2	0.06629
4.2	11.6	0.05487
4.2	12	0.04933
4.2	12.4	0.05347
4.2	12.8	0.08424
4.2	13.2	0.04861
4.2	13.6	0.07767
4.2	14	0.07146
4.2	14.4	0.05616
4.2	14.8	0.04923
4.2	15.2	0.06552
4.2	15.6	0.06112
4.2	16	0.06872
4.2	16.4	0.04483
4.2	16.8	0.04644
4.2	17.2	0.08548
4.2	17.6	0.03372
4.2	18	0.071
4.2	18.4	0.06738
4.2	18.8	0.07157
4.2	19.2	0.07281
4.2	19.6	0.07932
4.2	20	0.04747
4.2	20.4	0.09406
4.2	20.8	0.07364
4.2	21.2	0.05735
4.2	21.6	0.05026
4.2	22	0.06996
4.2	22.4	0.06552
4.2	22.8	0.05404
4.2	23.2	0.05026
4.2	23.6	0.05595
4.2	24	0.07327
4.2	24.4	0.05497
4.2	24.8	0.06645
4.2	25.2	0.05533
4.2	25.6	0.05337
4.2	26	0.06154
4.2	26.4	0.0515
4.2	26.8	0.06004
4.2	27.2	0.05181
4.2	27.6	0.05543
4.2	28	0.06759
4.2	28.4	0.06298
4.2	28.8	0.06221
4.2	29.2	0.0348
4.2	29.6	0.04473
4.2	30	0.07312
4.2	30.4	0.06391
4.2	30.8	0.06598
4.2	31.2	0.06324
4.2	31.6	0.0724
4.2	32	0.05207
4.2	32.4	0.04494
4.2	32.8	0.06205
4.2	33.2	0.06076
4.2	33.6	0.05326
4.2	34	0.05843
4.2	34.4	0.07441
4.2	34.8	0.07607
4.2	35.2	0.05533
4.2	35.6	0.05605
4.2	36	0.04085
4.2	36.4	0.05187
4.2	36.8	0.05993
4.2	37.2	0.05254
4.2	37.6	0.03899
4.2	38	0.05518
4.2	38.4	0.07038
4.2	38.8	0.05047
4.2	39.2	0.05978
4.2	39.6	0.05492
4.2	40	0.04194
4.2	40.4	0.05264
4.2	40.8	0.04287
4.2	41.2	0.0588
4.2	41.6	0.065
4.2	42	0.0545
4.2	42.4	0.05368
4.2	42.8	0.04504
4.2	43.2	0.04406
4.2	43.6	0.04861
4.2	44	0.05399
4.2	44.4	0.05011
4.2	44.8	0.05326
4.2	45.2	0.05424
4.2	45.6	0.05202
4.2	46	0.03423
4.2	46.4	0.04364
4.2	46.8	0.05
4.2	47.2	0.04323
4.2	47.6	0.04819
4.2	48	0.05037
4.2	48.4	0.06567
4.2	48.8	0.06019
4.2	49.2	0.08393
4.2	49.6	0.05533
4.2	50	0.02415
4.2	50.4	0.05781
4.2	50.8	0.05828
4.2	51.2	0.04644
4.2	51.6	0.05399
4.2	52	0.03547
4.2	52.4	0.03129
4.2	52.8	0.05611
4.2	53.2	0.06045
4.2	53.6	0.04582
4.2	54	0.04199
4.2	54.4	0.04328
4.2	54.8	0.03097
4.2	55.2	0.07136
4.2	55.6	0.04132
4.2	56	0.04902
4.2	56.4	0.04732
4.2	56.8	0.05471
4.2	57.2	0.05145
4.2	57.6	0.04359
4.2	58	0.07064
4.2	58.4	0.04339
4.2	58.8	0.03584
4.2	59.2	0.04049
4.2	59.6	0.04669
4.2	60	0.06024
4.2	60.4	0.04654
4.2	60.8	0.0468
4.2	61.2	0.05099
4.2	61.6	0.04804
4.2	62	0.02885
4.2	62.4	0.02989
4.2	62.8	0.05073
4.2	63.2	0.03956
4.2	63.6	0.05476
4.2	64	0.04504
4.2	64.4	0.04938
4.2	64.8	0.0379
4.2	65.2	0.04447
4.2	65.6	0.04018
4.2	66	0.0377
4.2	66.4	0.0424
4.2	66.8	0.0498
4.2	67.2	0.04902
4.2	67.6	0.03082
4.2	68	0.03165
4.2	68.4	0.05114
4.2	68.8	0.03413
4.2	69.2	0.0408
4.2	69.6	0.04856
3.8	-99.6	-0.85152
3.8	-99.2	-0.85374
3.8	-98.8	-0.88244
3.8	-98.4	-0.88648
3.8	-98	-0.90768
3.8	-97.6	-0.92443
3.8	-97.2	-0.95639
3.8	-96.8	-0.96244
3.8	-96.4	-0.97371
3.8	-96	-0.99512
3.8	-95.6	-1.02015
3.8	-95.2	-1.02475
3.8	-94.8	-1.04088
3.8	-94.4	-1.05004
3.8	-94	-1.07765
3.8	-93.6	-1.0836
3.8	-93.2	-1.0972
3.8	-92.8	-1.09016
3.8	-92.4	-1.09642
3.8	-92	-1.09234
3.8	-91.6	-1.08277
3.8	-91.2	-1.06328
3.8	-90.8	-1.05578
3.8	-90.4	-1.02304
3.8	-90	-1.00029
3.8	-89.6	-0.96797
3.8	-89.2	-0.90437
3.8	-88.8	-0.87743
3.8	-88.4	-0.81005
3.8	-88	-0.73584
3.8	-87.6	-0.66422
3.8	-87.2	-0.57016
3.8	-86.8	-0.44714
3.8	-86.4	-0.34993
3.8	-86	-0.21936
3.8	-85.6	-0.1012
3.8	-85.2	0.02146
3.8	-84.8	0.14003
3.8	-84.4	0.25679
3.8	-84	0.3629
3.8	-83.6	0.47708
3.8	-83.2	0.5667
3.8	-82.8	0.66908
3.8	-82.4	0.77178
3.8	-82	0.8221
3.8	-81.6	0.90587
3.8	-81.2	0.95499
3.8	-80.8	0.96761
3.8	-80.4	1.01767
3.8	-80	1.00748
3.8	-79.6	0.99465
3.8	-79.2	0.9976
3.8	-78.8	0.97671
3.8	-78.4	0.94005
3.8	-78	0.92335
3.8	-77.6	0.9022
3.8	-77.2	0.87784
3.8	-76.8	0.84459
3.8	-76.4	0.81605
3.8	-76	0.78817
3.8	-75.6	0.77478
3.8	-75.2	0.74153
3.8	-74.8	0.72855
3.8	-74.4	0.69928
3.8	-74	0.67451
3.8	-73.6	0.65057
3.8	-73.2	0.64587
3.8	-72.8	0.64023
3.8	-72.4	0.59897
3.8	-72	0.60134
3.8	-71.6	0.58019
3.8	-71.2	0.57823
3.8	-70.8	0.57011
3.8	-70.4	0.54477
3.8	-70	0.51188
3.8	-69.6	0.51525
3.8	-69.2	0.50883
3.8	-68.8	0.47698
3.8	-68.4	0.48536
3.8	-68	0.48013
3.8	-67.6	0.47501
3.8	-67.2	0.45536
3.8	-66.8	0.45619
3.8	-66.4	0.44849
3.8	-66	0.44275
3.8	-65.6	0.42465
3.8	-65.2	0.4217
3.8	-64.8	0.41762
3.8	-64.4	0.4263
3.8	-64	0.39652
3.8	-63.6	0.39569
3.8	-63.2	0.38778
3.8	-62.8	0.38509
3.8	-62.4	0.3674
3.8	-62	0.37294
3.8	-61.6	0.36384
3.8	-61.2	0.36482
3.8	-60.8	0.3505
3.8	-60.4	0.35432
3.8	-60	0.34486
3.8	-59.6	0.3475
3.8	-59.2	0.35256
3.8	-58.8	0.32831
3.8	-58.4	0.34114
3.8	-58	0.33953
3.8	-57.6	0.3113
3.8	-57.2	0.30711
3.8	-56.8	0.31363
3.8	-56.4	0.31419
3.8	-56	0.30809
3.8	-55.6	0.31388
3.8	-55.2	0.30871
3.8	-54.8	0.28343
3.8	-54.4	0.31673
3.8	-54	0.29387
3.8	-53.6	0.28043
3.8	-53.2	0.29113
3.8	-52.8	0.30039
3.8	-52.4	0.27324
3.8	-52	0.30985
3.8	-51.6	0.27417
3.8	-51.2	0.27634
3.8	-50.8	0.29082
3.8	-50.4	0.28053
3.8	-50	0.26243
3.8	-49.6	0.2615
3.8	-49.2	0.26419
3.8	-48.8	0.25974
3.8	-48.4	0.27112
3.8	-48	0.24221
3.8	-47.6	0.23663
3.8	-47.2	0.25225
3.8	-46.8	0.26631
3.8	-46.4	0.25705
3.8	-46	0.23378
3.8	-45.6	0.24826
3.8	-45.2	0.24919
3.8	-44.8	0.24713
3.8	-44.4	0.269
3.8	-44	0.23921
3.8	-43.6	0.24252
3.8	-43.2	0.23704
3.8	-42.8	0.25581
3.8	-42.4	0.22215
3.8	-42	0.20581
3.8	-41.6	0.2313
3.8	-41.2	0.20643
3.8	-40.8	0.22282
3.8	-40.4	0.22401
3.8	-40	0.22525
3.8	-39.6	0.21631
3.8	-39.2	0.20752
3.8	-38.8	0.18916
3.8	-38.4	0.2161
3.8	-38	0.21279
3.8	-37.6	0.19366
3.8	-37.2	0.17416
3.8	-36.8	0.21067
3.8	-36.4	0.1738
3.8	-36	0.19841
3.8	-35.6	0.18213
3.8	-35.2	0.16884
3.8	-34.8	0.18569
3.8	-34.4	0.17023
3.8	-34	0.15767
3.8	-33.6	0.1526
3.8	-33.2	0.16904
3.8	-32.8	0.13067
3.8	-32.4	0.18383
3.8	-32	0.16661
3.8	-31.6	0.15089
3.8	-31.2	0.16108
3.8	-30.8	0.17628
3.8	-30.4	0.13688
3.8	-30	0.1542
3.8	-29.6	0.14184
3.8	-29.2	0.11713
3.8	-28.8	0.14071
3.8	-28.4	0.12411
3.8	-28	0.14417
3.8	-27.6	0.12354
3.8	-27.2	0.09727
3.8	-26.8	0.12049
3.8	-26.4	0.11609
3.8	-26	0.10694
3.8	-25.6	0.13988
3.8	-25.2	0.11852
3.8	-24.8	0.12214
3.8	-24.4	0.10746
3.8	-24	0.14065
3.8	-23.6	0.14634
3.8	-23.2	0.10735
3.8	-22.8	0.13181
3.8	-22.4	0.08832
3.8	-22	0.10575
3.8	-21.6	0.07441
3.8	-21.2	0.09825
3.8	-20.8	0.11107
3.8	-20.4	0.09375
3.8	-20	0.11325
3.8	-19.6	0.09903
3.8	-19.2	0.09411
3.8	-18.8	0.08646
3.8	-18.4	0.08646
3.8	-18	0.09148
3.8	-17.6	0.11304
3.8	-17.2	0.07327
3.8	-16.8	0.09044
3.8	-16.4	0.09861
3.8	-16	0.09179
3.8	-15.6	0.10854
3.8	-15.2	0.11154
3.8	-14.8	0.06831
3.8	-14.4	0.07095
3.8	-14	0.07715
3.8	-13.6	0.0694
3.8	-13.2	0.08346
3.8	-12.8	0.0861
3.8	-12.4	0.07638
3.8	-12	0.05766
3.8	-11.6	0.05223
3.8	-11.2	0.08243
3.8	-10.8	0.05585
3.8	-10.4	0.07229
3.8	-10	0.10544
3.8	-9.6	0.11071
3.8	-9.2	0.07488
3.8	-8.8	0.08046
3.8	-8.4	0.11759
3.8	-8	0.0815
3.8	-7.6	0.07772
3.8	-7.2	0.13181
3.8	-6.8	0.08713
3.8	-6.4	0.0938
3.8	-6	0.06903
3.8	-5.6	0.10766
3.8	-5.2	0.1088
3.8	-4.8	0.07751
3.8	-4.4	0.05559
3.8	-4	0.10673
3.8	-3.6	0.06603
3.8	-3.2	0.11345
3.8	-2.8	0.0545
3.8	-2.4	0.07208
3.8	-2	0.06154
3.8	-1.6	0.08088
3.8	-1.2	0.09246
3.8	-0.8	0.09794
3.8	-0.4	0.10104
3.8	0	0.12405
3.8	0.4	0.06836
3.8	0.8	0.06148
3.8	1.2	0.12566
3.8	1.6	0.06624
3.8	2	0.07038
3.8	2.4	0.08424
3.8	2.8	0.08879
3.8	3.2	0.09494
3.8	3.6	0.05688
3.8	4	0.08936
3.8	4.4	0.07643
3.8	4.8	0.09303
3.8	5.2	0.1224
3.8	5.6	0.08175
3.8	6	0.0787
3.8	6.4	0.11666
3.8	6.8	0.07514
3.8	7.2	0.10068
3.8	7.6	0.07271
3.8	8	0.09339
3.8	8.4	0.09649
3.8	8.8	0.11433
3.8	9.2	0.09835
3.8	9.6	0.11568
3.8	10	0.07317
3.8	10.4	0.07043
3.8	10.8	0.08165
3.8	11.2	0.07633
3.8	11.6	0.07229
3.8	12	0.1043
3.8	12.4	0.07255
3.8	12.8	0.1042
3.8	13.2	0.0845
3.8	13.6	0.08046
3.8	14	0.07105
3.8	14.4	0.07907
3.8	14.8	0.04592
3.8	15.2	0.06666
3.8	15.6	0.07896
3.8	16	0.09437
3.8	16.4	0.06898
3.8	16.8	0.08108
3.8	17.2	0.08196
3.8	17.6	0.07612
3.8	18	0.09784
3.8	18.4	0.04913
3.8	18.8	0.06588
3.8	19.2	0.0756
3.8	19.6	0.08868
3.8	20	0.07576
3.8	20.4	0.08863
3.8	20.8	0.08972
3.8	21.2	0.07389
3.8	21.6	0.06909
3.8	22	0.08698
3.8	22.4	0.07974
3.8	22.8	0.04566
3.8	23.2	0.0649
3.8	23.6	0.05347
3.8	24	0.06847
3.8	24.4	0.09654
3.8	24.8	0.07601
3.8	25.2	0.06955
3.8	25.6	0.07503
3.8	26	0.09422
3.8	26.4	0.08372
3.8	26.8	0.06148
3.8	27.2	0.06516
3.8	27.6	0.08232
3.8	28	0.0694
3.8	28.4	0.06345
3.8	28.8	0.06283
3.8	29.2	0.0709
3.8	29.6	0.07162
3.8	30	0.07291
3.8	30.4	0.05792
3.8	30.8	0.07022
3.8	31.2	0.05512
3.8	31.6	0.06505
3.8	32	0.08269
3.8	32.4	0.08786
3.8	32.8	0.07152
3.8	33.2	0.06355
3.8	33.6	0.07881
3.8	34	0.06764
3.8	34.4	0.08
3.8	34.8	0.05378
3.8	35.2	0.07038
3.8	35.6	0.07462
3.8	36	0.07338
3.8	36.4	0.06753
3.8	36.8	0.053
3.8	37.2	0.05249
3.8	37.6	0.05337
3.8	38	0.05673
3.8	38.4	0.08641
3.8	38.8	0.06712
3.8	39.2	0.05171
3.8	39.6	0.06588
3.8	40	0.04561
3.8	40.4	0.0468
3.8	40.8	0.0619
3.8	41.2	0.065
3.8	41.6	0.05455
3.8	42	0.07519
3.8	42.4	0.08119
3.8	42.8	0.05776
3.8	43.2	0.07757
3.8	43.6	0.07369
3.8	44	0.06753
3.8	44.4	0.0621
3.8	44.8	0.06004
3.8	45.2	0.08646
3.8	45.6	0.06893
3.8	46	0.08031
3.8	46.4	0.0452
3.8	46.8	0.06397
3.8	47.2	0.06319
3.8	47.6	0.06345
3.8	48	0.04209
3.8	48.4	0.05745
3.8	48.8	0.08351
3.8	49.2	0.05636
3.8	49.6	0.05921
3.8	50	0.07669
3.8	50.4	0.06909
3.8	50.8	0.06645
3.8	51.2	0.04995
3.8	51.6	0.02927
3.8	52	0.05874
3.8	52.4	0.05481
3.8	52.8	0.04158
3.8	53.2	0.0528
3.8	53.6	0.06872
3.8	54	0.05393
3.8	54.4	0.06712
3.8	54.8	0.0558
3.8	55.2	0.05771
3.8	55.6	0.05445
3.8	56	0.06247
3.8	56.4	0.05409
3.8	56.8	0.05218
3.8	57.2	0.04871
3.8	57.6	0.02979
3.8	58	0.03801
3.8	58.4	0.05223
3.8	58.8	0.06055
3.8	59.2	0.04121
3.8	59.6	0.02472
3.8	60	0.0589
3.8	60.4	0.05362
3.8	60.8	0.04675
3.8	61.2	0.04778
3.8	61.6	0.05719
3.8	62	0.05362
3.8	62.4	0.05988
3.8	62.8	0.06764
3.8	63.2	0.04127
3.8	63.6	0.05564
3.8	64	0.04385
3.8	64.4	0.06019
3.8	64.8	0.06231
3.8	65.2	0.03728
3.8	65.6	0.04339
3.8	66	0.04276
3.8	66.4	0.0515
3.8	66.8	0.04638
3.8	67.2	0.06112
3.8	67.6	0.04152
3.8	68	0.04333
3.8	68.4	0.06179
3.8	68.8	0.05533
3.8	69.2	0.04763
3.8	69.6	0.06495
3.4	-99.6	-0.72736
3.4	-99.2	-0.75177
3.4	-98.8	-0.76702
3.4	-98.4	-0.77892
3.4	-98	-0.76025
3.4	-97.6	-0.79081
3.4	-97.2	-0.81884
3.4	-96.8	-0.80503
3.4	-96.4	-0.8283
3.4	-96	-0.83352
3.4	-95.6	-0.84113
3.4	-95.2	-0.86026
3.4	-94.8	-0.878
3.4	-94.4	-0.88337
3.4	-94	-0.9023
3.4	-93.6	-0.91549
3.4	-93.2	-0.93984
3.4	-92.8	-0.93705
3.4	-92.4	-0.96151
3.4	-92	-0.98178
3.4	-91.6	-0.99559
3.4	-91.2	-1.03483
3.4	-90.8	-1.03768
3.4	-90.4	-1.05324
3.4	-90	-1.09001
3.4	-89.6	-1.09704
3.4	-89.2	-1.09875
3.4	-88.8	-1.13102
3.4	-88.4	-1.14125
3.4	-88	-1.17988
3.4	-87.6	-1.19571
3.4	-87.2	-1.19328
3.4	-86.8	-1.19141
3.4	-86.4	-1.20987
3.4	-86	-1.21515
3.4	-85.6	-1.20232
3.4	-85.2	-1.21453
3.4	-84.8	-1.19695
3.4	-84.4	-1.17073
3.4	-84	-1.16804
3.4	-83.6	-1.12016
3.4	-83.2	-1.08608
3.4	-82.8	-1.05784
3.4	-82.4	-1.01058
3.4	-82	-0.96306
3.4	-81.6	-0.89496
3.4	-81.2	-0.83497
3.4	-80.8	-0.75823
3.4	-80.4	-0.65647
3.4	-80	-0.55486
3.4	-79.6	-0.46307
3.4	-79.2	-0.33426
3.4	-78.8	-0.19743
3.4	-78.4	-0.08382
3.4	-78	0.06164
3.4	-77.6	0.17028
3.4	-77.2	0.30747
3.4	-76.8	0.44957
3.4	-76.4	0.55387
3.4	-76	0.66898
3.4	-75.6	0.77928
3.4	-75.2	0.83518
3.4	-74.8	0.91042
3.4	-74.4	0.97294
3.4	-74	1.02816
3.4	-73.6	1.01818
3.4	-73.2	1.05836
3.4	-72.8	1.05521
3.4	-72.4	1.0292
3.4	-72	1.0459
3.4	-71.6	1.02889
3.4	-71.2	0.99512
3.4	-70.8	0.98964
3.4	-70.4	0.95923
3.4	-70	0.95194
3.4	-69.6	0.90633
3.4	-69.2	0.91642
3.4	-68.8	0.8736
3.4	-68.4	0.85747
3.4	-68	0.8357
3.4	-67.6	0.80901
3.4	-67.2	0.82458
3.4	-66.8	0.78569
3.4	-66.4	0.74029
3.4	-66	0.74546
3.4	-65.6	0.74893
3.4	-65.2	0.7225
3.4	-64.8	0.69866
3.4	-64.4	0.6998
3.4	-64	0.66609
3.4	-63.6	0.67183
3.4	-63.2	0.63966
3.4	-62.8	0.6152
3.4	-62.4	0.62673
3.4	-62	0.62017
3.4	-61.6	0.61634
3.4	-61.2	0.59607
3.4	-60.8	0.60931
3.4	-60.4	0.57021
3.4	-60	0.56551
3.4	-59.6	0.5954
3.4	-59.2	0.56468
3.4	-58.8	0.55325
3.4	-58.4	0.55232
3.4	-58	0.54053
3.4	-57.6	0.52807
3.4	-57.2	0.54405
3.4	-56.8	0.53004
3.4	-56.4	0.49435
3.4	-56	0.5049
3.4	-55.6	0.51504
3.4	-55.2	0.50459
3.4	-54.8	0.48748
3.4	-54.4	0.48577
3.4	-54	0.46772
3.4	-53.6	0.46529
3.4	-53.2	0.45769
3.4	-52.8	0.46788
3.4	-52.4	0.45097
3.4	-52	0.46074
3.4	-51.6	0.4444
3.4	-51.2	0.4458
3.4	-50.8	0.44652
3.4	-50.4	0.44311
3.4	-50	0.44983
3.4	-49.6	0.43473
3.4	-49.2	0.43778
3.4	-48.8	0.42423
3.4	-48.4	0.42294
3.4	-48	0.41312
3.4	-47.6	0.40614
3.4	-47.2	0.40303
3.4	-46.8	0.39926
3.4	-46.4	0.38654
3.4	-46	0.41151
3.4	-45.6	0.39098
3.4	-45.2	0.39347
3.4	-44.8	0.40546
3.4	-44.4	0.39636
3.4	-44	0.3915
3.4	-43.6	0.38287
3.4	-43.2	0.38768
3.4	-42.8	0.37837
3.4	-42.4	0.36937
3.4	-42	0.38023
3.4	-41.6	0.36099
3.4	-41.2	0.36032
3.4	-40.8	0.35406
3.4	-40.4	0.37806
3.4	-40	0.35753
3.4	-39.6	0.33198
3.4	-39.2	0.35851
3.4	-38.8	0.35008
3.4	-38.4	0.34843
3.4	-38	0.33633
3.4	-37.6	0.31787
3.4	-37.2	0.337
3.4	-36.8	0.32966
3.4	-36.4	0.32397
3.4	-36	0.3145
3.4	-35.6	0.30566
3.4	-35.2	0.31756
3.4	-34.8	0.29868
3.4	-34.4	0.27298
3.4	-34	0.30452
3.4	-33.6	0.26734
3.4	-33.2	0.29403
3.4	-32.8	0.28849
3.4	-32.4	0.28162
3.4	-32	0.25059
3.4	-31.6	0.25633
3.4	-31.2	0.25214
3.4	-30.8	0.26186
3.4	-30.4	0.25566
3.4	-30	0.22701
3.4	-29.6	0.22856
3.4	-29.2	0.20234
3.4	-28.8	0.21403
3.4	-28.4	0.20017
3.4	-28	0.18828
3.4	-27.6	0.21982
3.4	-27.2	0.20912
3.4	-26.8	0.21476
3.4	-26.4	0.19257
3.4	-26	0.17282
3.4	-25.6	0.23999
3.4	-25.2	0.19045
3.4	-24.8	0.20643
3.4	-24.4	0.20477
3.4	-24	0.19154
3.4	-23.6	0.17189
3.4	-23.2	0.17308
3.4	-22.8	0.19159
3.4	-22.4	0.15146
3.4	-22	0.17892
3.4	-21.6	0.1646
3.4	-21.2	0.14763
3.4	-20.8	0.16201
3.4	-20.4	0.151
3.4	-20	0.14495
3.4	-19.6	0.12912
3.4	-19.2	0.17416
3.4	-18.8	0.12638
3.4	-18.4	0.13378
3.4	-18	0.14862
3.4	-17.6	0.14055
3.4	-17.2	0.11847
3.4	-16.8	0.10125
3.4	-16.4	0.11997
3.4	-16	0.12199
3.4	-15.6	0.11268
3.4	-15.2	0.15979
3.4	-14.8	0.14086
3.4	-14.4	0.1165
3.4	-14	0.12302
3.4	-13.6	0.11547
3.4	-13.2	0.14024
3.4	-12.8	0.13129
3.4	-12.4	0.10704
3.4	-12	0.09504
3.4	-11.6	0.15467
3.4	-11.2	0.12183
3.4	-10.8	0.0997
3.4	-10.4	0.09841
3.4	-10	0.14484
3.4	-9.6	0.14857
3.4	-9.2	0.1209
3.4	-8.8	0.17902
3.4	-8.4	0.07829
3.4	-8	0.13352
3.4	-7.6	0.08382
3.4	-7.2	0.14484
3.4	-6.8	0.10699
3.4	-6.4	0.15291
3.4	-6	0.13977
3.4	-5.6	0.11594
3.4	-5.2	0.16759
3.4	-4.8	0.145
3.4	-4.4	0.16832
3.4	-4	0.13383
3.4	-3.6	0.09267
3.4	-3.2	0.13072
3.4	-2.8	0.09018
3.4	-2.4	0.1437
3.4	-2	0.12312
3.4	-1.6	0.13874
3.4	-1.2	0.13879
3.4	-0.8	0.09417
3.4	-0.4	0.14143
3.4	0	0.15312
3.4	0.4	0.13652
3.4	0.8	0.14205
3.4	1.2	0.13326
3.4	1.6	0.13574
3.4	2	0.09592
3.4	2.4	0.12209
3.4	2.8	0.1286
3.4	3.2	0.11444
3.4	3.6	0.08062
3.4	4	0.12012
3.4	4.4	0.10446
3.4	4.8	0.10497
3.4	5.2	0.09251
3.4	5.6	0.08718
3.4	6	0.13977
3.4	6.4	0.12168
3.4	6.8	0.10854
3.4	7.2	0.11604
3.4	7.6	0.13693
3.4	8	0.09727
3.4	8.4	0.11407
3.4	8.8	0.09815
3.4	9.2	0.09179
3.4	9.6	0.11764
3.4	10	0.1089
3.4	10.4	0.10203
3.4	10.8	0.12659
3.4	11.2	0.10792
3.4	11.6	0.08641
3.4	12	0.121
3.4	12.4	0.11413
3.4	12.8	0.11511
3.4	13.2	0.10063
3.4	13.6	0.10523
3.4	14	0.10306
3.4	14.4	0.09117
3.4	14.8	0.1057
3.4	15.2	0.08543
3.4	15.6	0.13186
3.4	16	0.11687
3.4	16.4	0.09122
3.4	16.8	0.09468
3.4	17.2	0.083
3.4	17.6	0.11904
3.4	18	0.07757
3.4	18.4	0.09344
3.4	18.8	0.0802
3.4	19.2	0.10771
3.4	19.6	0.10353
3.4	20	0.10585
3.4	20.4	0.06919
3.4	20.8	0.11666
3.4	21.2	0.08512
[truncated: 11,569 more rows]

## Sheet: Fig1e
B (T)	Rdrag (Ω)	B fit (T)	Rdrag- B2 fit (Ω)
9	-7.82618	9	-7.86146
9	-7.79784	9	-7.86146
9	-7.86453	9	-7.86146
9	-7.82409	9	-7.86146
9	-7.8313	9	-7.86146
9	-7.79546	9	-7.86146
9	-7.80832	9	-7.86146
8.9998	-7.82427	8.9998	-7.86127
8.9998	-7.82385	8.9998	-7.86127
8.9996	-7.80027	8.9996	-7.86109
8.9995	-7.78432	8.9995	-7.861
8.9992	-7.79014	8.9992	-7.86072
8.9987	-7.74313	8.9987	-7.86025
8.998	-7.7466	8.998	-7.8596
8.9968	-7.77321	8.9968	-7.85849
8.9949	-7.75164	8.9949	-7.85673
8.9919	-7.78022	8.9919	-7.85395
8.9875	-7.76086	8.9875	-7.84987
8.9709	-7.74668	8.9709	-7.83451
8.9709	-7.71213	8.9709	-7.83451
8.9526	-7.69435	8.9526	-7.8176
8.9433	-7.73713	8.9433	-7.80902
8.9343	-7.74076	8.9343	-7.80073
8.925	-7.68268	8.925	-7.79217
8.916	-7.69399	8.916	-7.7839
8.9067	-7.69638	8.9067	-7.77535
8.8974	-7.68681	8.8974	-7.76682
8.8881	-7.65475	8.8881	-7.75829
8.8795	-7.7083	8.8795	-7.75042
8.8702	-7.66739	8.8702	-7.74191
8.8609	-7.64931	8.8609	-7.73341
8.8422	-7.64698	8.8422	-7.71635
8.8333	-7.65079	8.8333	-7.70824
8.8244	-7.62392	8.8244	-7.70014
8.8151	-7.64055	8.8151	-7.69169
8.8058	-7.59037	8.8058	-7.68324
8.7968	-7.59572	8.7968	-7.67508
8.7875	-7.56172	8.7875	-7.66665
8.7775	-7.61941	8.7775	-7.65759
8.7682	-7.58301	8.7682	-7.64918
8.7592	-7.62285	8.7592	-7.64105
8.7503	-7.54341	8.7503	-7.63302
8.7317	-7.55472	8.7317	-7.61626
8.7224	-7.53983	8.7224	-7.6079
8.7133	-7.54422	8.7133	-7.59972
8.7044	-7.51127	8.7044	-7.59173
8.6951	-7.51945	8.6951	-7.58339
8.6858	-7.49995	8.6858	-7.57506
8.6768	-7.51347	8.6768	-7.567
8.6675	-7.4913	8.6675	-7.55869
8.6582	-7.50407	8.6582	-7.55039
8.6492	-7.49625	8.6492	-7.54236
8.6402	-7.47301	8.6402	-7.53434
8.6309	-7.42532	8.6309	-7.52606
8.6216	-7.46618	8.6216	-7.51779
8.6024	-7.47087	8.6024	-7.50075
8.5931	-7.44108	8.5931	-7.4925
8.5845	-7.42682	8.5845	-7.48489
8.5751	-7.40938	8.5751	-7.47658
8.5659	-7.41241	8.5659	-7.46845
8.5565	-7.39599	8.5565	-7.46015
8.5476	-7.41071	8.5476	-7.45231
8.5383	-7.40779	8.5383	-7.44412
8.5293	-7.38894	8.5293	-7.4362
8.5153	-7.39407	8.5153	-7.4239
8.511	-7.36892	8.511	-7.42013
8.4924	-7.32884	8.4924	-7.40383
8.4831	-7.31755	8.4831	-7.39569
8.4744	-7.33772	8.4744	-7.38809
8.4651	-7.35828	8.4651	-7.37997
8.4558	-7.30191	8.4558	-7.37186
8.4465	-7.30168	8.4465	-7.36376
8.4376	-7.325	8.4376	-7.35601
8.4283	-7.26216	8.4283	-7.34793
8.4192	-7.28937	8.4192	-7.34003
8.4053	-7.26372	8.4053	-7.32797
8.3917	-7.25582	8.3917	-7.3162
8.3824	-7.26658	8.3824	-7.30816
8.3731	-7.2148	8.3731	-7.30013
8.3632	-7.27763	8.3632	-7.29159
8.3542	-7.22631	8.3542	-7.28383
8.3452	-7.22256	8.3452	-7.27609
8.3359	-7.23395	8.3359	-7.26809
8.3266	-7.19167	8.3266	-7.26011
8.3173	-7.18929	8.3173	-7.25213
8.3083	-7.20021	8.3083	-7.24442
8.2994	-7.15104	8.2994	-7.2368
8.2901	-7.17416	8.2901	-7.22885
8.2718	-7.19668	8.2718	-7.21322
8.2625	-7.13716	8.2625	-7.2053
8.2531	-7.17888	8.2531	-7.1973
8.2442	-7.13672	8.2442	-7.18973
8.2352	-7.12557	8.2352	-7.18209
8.2259	-7.1565	8.2259	-7.1742
8.2166	-7.11357	8.2166	-7.16632
8.2073	-7.10594	8.2073	-7.15844
8.1987	-7.11615	8.1987	-7.15117
8.1884	-7.10848	8.1884	-7.14247
8.1794	-7.10782	8.1794	-7.13488
8.1654	-7.08477	8.1654	-7.12309
8.1608	-7.07706	8.1608	-7.11921
8.1426	-7.0874	8.1426	-7.10392
8.1333	-7.05037	8.1333	-7.09612
8.1243	-7.0742	8.1243	-7.08858
8.115	-6.98637	8.115	-7.0808
8.106	-7.00715	8.106	-7.07327
8.0967	-7.02232	8.0967	-7.0655
8.0874	-7.02487	8.0874	-7.05775
8.0781	-7.04787	8.0781	-7.05
8.0695	-7.00586	8.0695	-7.04284
8.0601	-7.01911	8.0601	-7.03503
8.0509	-6.98652	8.0509	-7.02739
8.0325	-6.99747	8.0325	-7.01214
8.0325	-7.0195	8.0325	-7.01214
8.0142	-7.01098	8.0142	-6.997
8.0049	-6.99281	8.0049	-6.98932
7.996	-7.00298	7.996	-6.98198
7.9867	-6.96066	7.9867	-6.97432
7.9774	-6.95555	7.9774	-6.96667
7.9684	-6.89586	7.9684	-6.95927
7.9591	-6.96412	7.9591	-6.95164
7.9491	-6.93014	7.9491	-6.94344
7.9402	-6.90196	7.9402	-6.93615
7.9309	-6.92114	7.9309	-6.92854
7.9216	-6.92376	7.9216	-6.92095
7.9037	-6.8666	7.9037	-6.90635
7.9037	-6.89007	7.9037	-6.90635
7.8851	-6.91473	7.8851	-6.89121
7.8758	-6.8739	7.8758	-6.88365
7.8668	-6.9121	7.8668	-6.87635
7.8575	-6.8949	7.8575	-6.86882
7.8486	-6.86239	7.8486	-6.86161
7.8393	-6.84482	7.8393	-6.85409
7.8303	-6.86961	7.8303	-6.84682
7.821	-6.87834	7.821	-6.83932
7.8117	-6.8409	7.8117	-6.83183
7.8024	-6.85434	7.8024	-6.82434
7.7934	-6.8029	7.7934	-6.81711
7.7844	-6.83326	7.7844	-6.80988
7.7744	-6.76115	7.7744	-6.80186
7.7558	-6.76313	7.7558	-6.78698
7.7512	-6.80668	7.7512	-6.7833
7.7375	-6.7892	7.7375	-6.77236
7.7286	-6.78567	7.7286	-6.76527
7.7193	-6.77434	7.7193	-6.75786
7.71	-6.75229	7.71	-6.75047
7.701	-6.75603	7.701	-6.74332
7.6917	-6.73643	7.6917	-6.73594
7.6824	-6.75687	7.6824	-6.72857
7.6735	-6.75781	7.6735	-6.72153
7.6645	-6.73974	7.6645	-6.71441
7.6552	-6.73964	7.6552	-6.70707
7.6413	-6.73197	7.6413	-6.69611
7.6273	-6.71014	7.6273	-6.6851
7.6187	-6.68394	7.6187	-6.67834
7.6094	-6.70412	7.6094	-6.67104
7.6001	-6.68216	7.6001	-6.66375
7.5908	-6.67834	7.5908	-6.65647
7.5818	-6.67442	7.5818	-6.64943
7.5725	-6.70796	7.5725	-6.64217
7.5635	-6.66173	7.5635	-6.63514
7.5542	-6.66504	7.5542	-6.6279
7.5452	-6.64096	7.5452	-6.62089
7.5306	-6.67035	7.5306	-6.60955
7.5166	-6.65372	7.5166	-6.59869
7.5074	-6.66626	7.5074	-6.59157
7.4987	-6.62616	7.4987	-6.58484
7.4894	-6.64821	7.4894	-6.57766
7.4801	-6.60235	7.4801	-6.57048
7.4708	-6.63773	7.4708	-6.56331
7.4615	-6.65417	7.4615	-6.55616
7.4526	-6.59357	7.4526	-6.54932
7.4436	-6.57606	7.4436	-6.54241
7.4343	-6.60893	7.4343	-6.53527
7.425	-6.60814	7.425	-6.52815
7.4067	-6.58914	7.4067	-6.51416
7.3974	-6.60125	7.3974	-6.50707
7.3885	-6.55858	7.3885	-6.50029
7.3795	-6.53086	7.3795	-6.49343
7.3702	-6.57875	7.3702	-6.48636
7.3609	-6.51535	7.3609	-6.4793
7.3516	-6.51811	7.3516	-6.47225
7.3422	-6.5146	7.3422	-6.46513
7.3326	-6.52655	7.3326	-6.45787
7.3236	-6.50589	7.3236	-6.45107
7.3143	-6.52312	7.3143	-6.44406
7.2957	-6.48745	7.2957	-6.43005
7.2911	-6.46832	7.2911	-6.42659
7.2774	-6.50067	7.2774	-6.41631
7.2685	-6.47713	7.2685	-6.40963
7.2592	-6.46328	7.2592	-6.40267
7.2502	-6.46544	7.2502	-6.39594
7.2409	-6.45468	7.2409	-6.38899
7.2316	-6.448	7.2316	-6.38206
7.2223	-6.45508	7.2223	-6.37513
7.2137	-6.43165	7.2137	-6.36873
7.2044	-6.43395	7.2044	-6.36182
7.1951	-6.45272	7.1951	-6.35492
7.1812	-6.43173	7.1812	-6.34462
7.1679	-6.4008	7.1679	-6.33478
7.1586	-6.41101	7.1586	-6.32792
7.1493	-6.39417	7.1493	-6.32106
7.14	-6.35198	7.14	-6.31421
7.131	-6.36748	7.131	-6.30759
7.1217	-6.36499	7.1217	-6.30076
7.1126	-6.38549	7.1126	-6.29408
7.1034	-6.37001	7.1034	-6.28734
7.0944	-6.37619	7.0944	-6.28075
7.0851	-6.34022	7.0851	-6.27396
7.0751	-6.37372	7.0751	-6.26666
7.0658	-6.35297	7.0658	-6.25988
7.0519	-6.31368	7.0519	-6.24977
7.0386	-6.34409	7.0386	-6.24011
7.0293	-6.3046	7.0293	-6.23337
7.02	-6.28693	7.02	-6.22663
7.0107	-6.31496	7.0107	-6.21991
7.0017	-6.30642	7.0017	-6.21341
6.9928	-6.32744	6.9928	-6.20699
6.9835	-6.26801	6.9835	-6.20029
6.9742	-6.28666	6.9742	-6.1936
6.9653	-6.25669	6.9653	-6.1872
6.9559	-6.29008	6.9559	-6.18046
6.9423	-6.27291	6.9423	-6.17072
6.9287	-6.22602	6.9287	-6.16099
6.9194	-6.23165	6.9194	-6.15436
6.9101	-6.2161	6.9101	-6.14773
6.9001	-6.20159	6.9001	-6.14061
6.8909	-6.23123	6.8909	-6.13407
6.8818	-6.22393	6.8818	-6.12761
6.8728	-6.21775	6.8728	-6.12123
6.8636	-6.1886	6.8636	-6.11472
6.8542	-6.21274	6.8542	-6.10807
6.8449	-6.18015	6.8449	-6.10151
6.836	-6.17056	6.836	-6.09523
6.8177	-6.16167	6.8177	-6.08235
6.8084	-6.19006	6.8084	-6.07582
6.7994	-6.14207	6.7994	-6.06951
6.7902	-6.12335	6.7902	-6.06307
6.7808	-6.1367	6.7808	-6.05649
6.7716	-6.10427	6.7716	-6.05006
6.763	-6.14457	6.763	-6.04407
6.7536	-6.11317	6.7536	-6.03752
6.7444	-6.10933	6.7444	-6.03112
6.7351	-6.11158	6.7351	-6.02466
6.7261	-6.117	6.7261	-6.01841
6.7168	-6.04957	6.7168	-6.01197
6.7032	-6.08219	6.7032	-6.00256
6.6892	-6.0807	6.6892	-5.9929
6.6803	-6.08717	6.6803	-5.98677
6.6709	-6.03295	6.6709	-5.9803
6.661	-6.03709	6.661	-5.97349
6.6516	-6.04415	6.6516	-5.96704
6.6427	-6.03426	6.6427	-5.96095
6.6337	-5.99615	6.6337	-5.95479
6.6244	-6.01251	6.6244	-5.94843
6.6151	-6.04411	6.6151	-5.94209
6.6058	-6.002	6.6058	-5.93575
6.5925	-5.96711	6.5925	-5.9267
6.5879	-5.96893	6.5879	-5.92358
6.5693	-5.97205	6.5693	-5.91096
6.56	-5.99141	6.56	-5.90467
6.551	-5.98661	6.551	-5.89859
6.5417	-5.95717	6.5417	-5.89231
6.5328	-5.94612	6.5328	-5.88632
6.5235	-5.95602	6.5235	-5.88006
6.5145	-5.95689	6.5145	-5.87401
6.5052	-5.92724	6.5052	-5.86777
6.4959	-5.92098	6.4959	-5.86154
6.4859	-5.93157	6.4859	-5.85485
6.4767	-5.89992	6.4767	-5.8487
6.468	-5.88466	6.468	-5.8429
6.4587	-5.86738	6.4587	-5.8367
6.4401	-5.85938	6.4401	-5.82434
6.4308	-5.87429	6.4308	-5.81817
6.4218	-5.8729	6.4218	-5.8122
6.4128	-5.86117	6.4128	-5.80625
6.4035	-5.8404	6.4035	-5.80011
6.3942	-5.86068	6.3942	-5.79397
6.3852	-5.8377	6.3852	-5.78805
6.3759	-5.85095	6.3759	-5.78193
6.3667	-5.83735	6.3667	-5.77589
6.3577	-5.8206	6.3577	-5.76998
6.3487	-5.79816	6.3487	-5.76409
6.3394	-5.7938	6.3394	-5.75801
6.3301	-5.8022	6.3301	-5.75194
6.3115	-5.81114	6.3115	-5.73982
6.3029	-5.77539	6.3029	-5.73423
6.2936	-5.78472	6.2936	-5.72819
6.2843	-5.77532	6.2843	-5.72216
6.2751	-5.75235	6.2751	-5.7162
6.2661	-5.73343	6.2661	-5.71039
6.2568	-5.7269	6.2568	-5.70438
6.2468	-5.74614	6.2468	-5.69794
6.2379	-5.75643	6.2379	-5.69221
6.2286	-5.73008	6.2286	-5.68624
6.2196	-5.72991	6.2196	-5.68046
6.2103	-5.68325	6.2103	-5.67451
6.201	-5.7101	6.201	-5.66856
6.1827	-5.71003	6.1827	-5.65688
6.1737	-5.70944	6.1737	-5.65115
6.1644	-5.68513	6.1644	-5.64523
6.1551	-5.71796	6.1551	-5.63933
6.1458	-5.69653	6.1458	-5.63343
6.1369	-5.67952	6.1369	-5.6278
6.1279	-5.65704	6.1279	-5.62211
6.1186	-5.63335	6.1186	-5.61624
6.1093	-5.63844	6.1093	-5.61038
6.1003	-5.6318	6.1003	-5.60471
6.091	-5.61483	6.091	-5.59887
6.0817	-5.60324	6.0817	-5.59303
6.0718	-5.62584	6.0718	-5.58683
6.0536	-5.60605	6.0536	-5.57546
6.0446	-5.61818	6.0446	-5.56985
6.0353	-5.5993	6.0353	-5.56406
6.026	-5.55866	6.026	-5.55828
6.0167	-5.61145	6.0167	-5.5525
6.0081	-5.59355	6.0081	-5.54717
5.9987	-5.59237	5.9987	-5.54136
5.9894	-5.55515	5.9894	-5.53561
5.9802	-5.56851	5.9802	-5.52993
5.9712	-5.56602	5.9712	-5.52439
5.9618	-5.55451	5.9618	-5.51861
5.9436	-5.55882	5.9436	-5.50744
5.9346	-5.56135	5.9346	-5.50193
5.9253	-5.54484	5.9253	-5.49625
5.916	-5.54017	5.916	-5.49057
5.9067	-5.53516	5.9067	-5.4849
5.8977	-5.51281	5.8977	-5.47943
5.8887	-5.53476	5.8887	-5.47396
5.8794	-5.51539	5.8794	-5.46832
5.8702	-5.49217	5.8702	-5.46275
5.8608	-5.49254	5.8608	-5.45707
5.8523	-5.48013	5.8523	-5.45193
5.833	-5.5062	5.833	-5.44031
5.8237	-5.48097	5.8237	-5.43472
5.8144	-5.50385	5.8144	-5.42915
5.8054	-5.46369	5.8054	-5.42376
5.7961	-5.44729	5.7961	-5.41819
5.7868	-5.44605	5.7868	-5.41264
5.7779	-5.45351	5.7779	-5.40734
5.7686	-5.405	5.7686	-5.4018
5.7596	-5.40697	5.7596	-5.39646
5.7503	-5.45799	5.7503	-5.39094
5.741	-5.42813	5.741	-5.38543
5.723	-5.42283	5.723	-5.3748
5.7137	-5.41493	5.7137	-5.36931
5.7044	-5.38754	5.7044	-5.36384
5.6951	-5.4077	5.6951	-5.35838
5.6861	-5.3986	5.6861	-5.3531
5.6772	-5.38776	5.6772	-5.34789
5.6679	-5.40025	5.6679	-5.34245
5.6586	-5.36896	5.6586	-5.33702
5.6493	-5.36473	5.6493	-5.3316
5.6396	-5.37724	5.6396	-5.32595
5.6303	-5.3401	5.6303	-5.32055
5.6118	-5.35631	5.6118	-5.30983
5.6118	-5.33211	5.6118	-5.30983
5.5939	-5.32724	5.5939	-5.2995
5.5846	-5.31488	5.5846	-5.29414
5.5753	-5.33107	5.5753	-5.28879
5.566	-5.29457	5.566	-5.28345
5.5567	-5.31773	5.5567	-5.27812
5.548	-5.32927	5.548	-5.27314
5.5388	-5.30683	5.5388	-5.26788
5.5294	-5.3181	5.5294	-5.26252
5.5201	-5.247	5.5201	-5.25722
5.5021	-5.27765	5.5021	-5.247
5.5021	-5.29616	5.5021	-5.247
5.4836	-5.26434	5.4836	-5.23652
5.4746	-5.2715	5.4746	-5.23144
5.4653	-5.26495	5.4653	-5.22619
5.4559	-5.2511	5.4559	-5.2209
5.447	-5.21755	5.447	-5.2159
5.4377	-5.19863	5.4377	-5.21068
5.4288	-5.24313	5.4288	-5.2057
5.4194	-5.21534	5.4194	-5.20044
5.4101	-5.21356	5.4101	-5.19525
5.4008	-5.21744	5.4008	-5.19007
5.3923	-5.17529	5.3923	-5.18534
5.3829	-5.16835	5.3829	-5.18012
5.373	-5.18557	5.373	-5.17463
5.3544	-5.16863	5.3544	-5.16435
5.3454	-5.18818	5.3454	-5.15939
5.3361	-5.17582	5.3361	-5.15427
5.3268	-5.19083	5.3268	-5.14916
5.3179	-5.14991	5.3179	-5.14427
5.3086	-5.14933	5.3086	-5.13918
5.2996	-5.11335	5.2996	-5.13426
5.2903	-5.13277	5.2903	-5.12918
5.281	-5.1278	5.281	-5.12412
5.272	-5.15151	5.272	-5.11922
5.263	-5.14203	5.263	-5.11434
5.2444	-5.12269	5.2444	-5.10426
5.2398	-5.11281	5.2398	-5.10178
5.2255	-5.10717	5.2255	-5.09406
5.2162	-5.10722	5.2162	-5.08906
5.2069	-5.08152	5.2069	-5.08406
5.1979	-5.08243	5.1979	-5.07924
5.1886	-5.07525	5.1886	-5.07426
5.1793	-5.07025	5.1793	-5.06929
5.1704	-5.06348	5.1704	-5.06454
5.1611	-5.09379	5.1611	-5.05959
5.1518	-5.05477	5.1518	-5.05465
5.1428	-5.06105	5.1428	-5.04987
5.1339	-5.02466	5.1339	-5.04516
5.1246	-5.01651	5.1246	-5.04024
5.1107	-5.01601	5.1107	-5.03291
5.0974	-5.0401	5.0974	-5.02591
5.0881	-5.00564	5.0881	-5.02103
5.0788	-4.9959	5.0788	-5.01615
5.0695	-5.00269	5.0695	-5.01129
5.0602	-5.00502	5.0602	-5.00643
5.0512	-4.98209	5.0512	-5.00174
5.0422	-4.95788	5.0422	-4.99706
5.0329	-4.96856	5.0329	-4.99223
5.0236	-4.96942	5.0236	-4.98741
5.0146	-4.9526	5.0146	-4.98276
5.0053	-4.96685	5.0053	-4.97795
4.996	-4.97143	4.996	-4.97316
4.9781	-4.94871	4.9781	-4.96396
4.9688	-4.92572	4.9688	-4.95919
4.9588	-4.95415	4.9588	-4.95407
4.9495	-4.93004	4.9495	-4.94932
4.9402	-4.9231	4.9402	-4.94458
4.931	-4.95226	4.931	-4.9399
4.922	-4.91458	4.922	-4.93533
4.913	-4.92351	4.913	-4.93077
4.9037	-4.91436	4.9037	-4.92606
4.8944	-4.91849	4.8944	-4.92137
4.8855	-4.91329	4.8855	-4.91688
4.8672	-4.89463	4.8672	-4.90768
4.8579	-4.88352	4.8579	-4.90302
4.8486	-4.89519	4.8486	-4.89837
4.8397	-4.90124	4.8397	-4.89393
4.8304	-4.88771	4.8304	-4.88929
4.821	-4.85532	4.821	-4.88461
4.812	-4.84354	4.812	-4.88015
4.8031	-4.85033	4.8031	-4.87574
4.7938	-4.87454	4.7938	-4.87114
4.7838	-4.86669	4.7838	-4.8662
4.7745	-4.86533	4.7745	-4.86162
4.7606	-4.8322	4.7606	-4.85479
4.7563	-4.82405	4.7563	-4.85268
4.738	-4.83151	4.738	-4.84372
4.7287	-4.82877	4.7287	-4.83919
4.7194	-4.81468	4.7194	-4.83466
4.7104	-4.80885	4.7104	-4.83028
4.7012	-4.81678	4.7012	-4.82582
4.6922	-4.8149	4.6922	-4.82146
4.6829	-4.81207	4.6829	-4.81697
4.6739	-4.81109	4.6739	-4.81263
4.6646	-4.81229	4.6646	-4.80815
4.6553	-4.77095	4.6553	-4.80369
4.6461	-4.7641	4.6461	-4.79928
4.6281	-4.78068	4.6281	-4.79067
4.6188	-4.7721	4.6188	-4.78624
4.6095	-4.77164	4.6095	-4.78182
4.6002	-4.75096	4.6002	-4.7774
4.5913	-4.74437	4.5913	-4.77319
4.5822	-4.75101	4.5822	-4.76888
4.573	-4.73083	4.573	-4.76454
4.5636	-4.73389	4.5636	-4.76011
4.5547	-4.73897	4.5547	-4.75593
4.5447	-4.73545	4.5447	-4.75124
4.5354	-4.73201	4.5354	-4.74689
4.5261	-4.72213	4.5261	-4.74255
4.5171	-4.73299	4.5171	-4.73835
4.4989	-4.69108	4.4989	-4.72989
4.4989	-4.71903	4.4989	-4.72989
4.4802	-4.72052	4.4802	-4.72124
4.471	-4.72058	4.471	-4.717
4.4624	-4.69729	4.4624	-4.71304
4.4531	-4.6855	4.4531	-4.70876
4.4438	-4.69753	4.4438	-4.7045
4.4345	-4.67103	4.4345	-4.70024
4.4255	-4.67958	4.4255	-4.69613
4.4162	-4.64374	4.4162	-4.6919
4.4073	-4.66169	4.4073	-4.68785
4.398	-4.67293	4.398	-4.68363
4.3887	-4.66638	4.3887	-4.67942
4.3697	-4.65358	4.3697	-4.67084
4.3604	-4.64389	4.3604	-4.66665
4.3511	-4.63663	4.3511	-4.66248
4.3421	-4.61336	4.3421	-4.65845
4.3331	-4.63831	4.3331	-4.65442
4.3238	-4.63147	4.3238	-4.65027
4.3145	-4.61655	4.3145	-4.64613
4.3052	-4.62	4.3052	-4.642
4.2963	-4.62674	4.2963	-4.63806
4.2873	-4.59922	4.2873	-4.63407
4.278	-4.6052	4.278	-4.62997
4.2595	-4.58822	4.2595	-4.62183
4.2505	-4.60443	4.2505	-4.61788
4.2412	-4.60266	4.2412	-4.61381
4.2323	-4.60375	4.2323	-4.60992
4.2229	-4.56873	4.2229	-4.60583
4.214	-4.57032	4.214	-4.60196
4.2047	-4.56548	4.2047	-4.59792
4.1954	-4.56244	4.1954	-4.5939
4.1861	-4.54935	4.1861	-4.58988
4.1682	-4.56121	4.1682	-4.58217
4.1682	-4.54909	4.1682	-4.58217
4.1496	-4.53209	4.1496	-4.5742
4.1403	-4.55062	4.1403	-4.57022
4.1312	-4.53472	4.1312	-4.56634
4.1223	-4.52796	4.1223	-4.56256
4.113	-4.54602	4.113	-4.55861
4.1036	-4.52444	4.1036	-4.55463
4.0947	-4.52244	4.0947	-4.55087
4.0853	-4.54334	4.0853	-4.54691
4.0764	-4.50978	4.0764	-4.54316
4.0671	-4.47702	4.0671	-4.53926
4.0535	-4.50301	4.0535	-4.53357
4.0489	-4.51399	4.0489	-4.53165
4.0302	-4.51013	4.0302	-4.52386
4.0213	-4.51514	4.0213	-4.52017
4.0124	-4.51381	4.0124	-4.51648
4.0031	-4.49499	4.0031	-4.51264
3.9938	-4.47213	3.9938	-4.50881
3.9845	-4.48223	3.9845	-4.50498
3.9755	-4.48432	3.9755	-4.50129
3.9666	-4.46344	3.9666	-4.49765
3.9573	-4.47218	3.9573	-4.49385
3.9479	-4.47231	3.9479	-4.49002
3.9387	-4.48867	3.9387	-4.48628
3.9297	-4.4791	3.9297	-4.48263
3.9204	-4.47184	3.9204	-4.47887
3.9021	-4.46325	3.9021	-4.47149
3.8931	-4.46506	3.8931	-4.46787
3.8838	-4.44489	3.8838	-4.46414
3.8745	-4.4206	3.8745	-4.46043
3.8652	-4.42727	3.8652	-4.45672
3.8565	-4.44106	3.8565	-4.45325
3.8472	-4.43722	3.8472	-4.44956
3.8379	-4.41964	3.8379	-4.44588
3.8287	-4.43476	3.8287	-4.44224
3.8104	-4.42828	3.8104	-4.43504
3.8014	-4.41916	3.8014	-4.43151
3.7921	-4.41611	3.7921	-4.42787
3.7829	-4.41075	3.7829	-4.42427
3.774	-4.40724	3.774	-4.42081
3.7646	-4.39908	3.7646	-4.41716
3.7553	-4.41572	3.7553	-4.41355
3.7464	-4.4066	3.7464	-4.41011
3.7374	-4.37963	3.7374	-4.40664
3.7281	-4.3621	3.7281	-4.40306
3.7188	-4.38354	3.7188	-4.39949
3.7095	-4.37124	3.7095	-4.39593
3.6996	-4.39415	3.6996	-4.39215
3.6816	-4.369	3.6816	-4.3853
3.6723	-4.36634	3.6723	-4.38178
3.663	-4.36498	3.663	-4.37826
3.6537	-4.36683	3.6537	-4.37475
3.6447	-4.34253	3.6447	-4.37137
3.6354	-4.34204	3.6354	-4.36788
3.6264	-4.31496	3.6264	-4.36451
3.6171	-4.32843	3.6171	-4.36104
3.6081	-4.35285	3.6081	-4.35769
3.5988	-4.34951	3.5988	-4.35423
3.5849	-4.34187	3.5849	-4.34909
3.5713	-4.33143	3.5713	-4.34407
3.5623	-4.29381	3.5623	-4.34076
3.5531	-4.32329	3.5531	-4.33739
3.5438	-4.31254	3.5438	-4.33399
3.5344	-4.3132	3.5344	-4.33056
3.5258	-4.30234	3.5258	-4.32743
3.5165	-4.30673	3.5165	-4.32405
3.5072	-4.31598	3.5072	-4.32069
3.4933	-4.29537	3.4933	-4.31567
3.4886	-4.29721	3.4886	-4.31398
3.4707	-4.31913	3.4707	-4.30756
3.4614	-4.28204	3.4614	-4.30424
3.4521	-4.29107	3.4521	-4.30092
3.4432	-4.27671	3.4432	-4.29776
3.4338	-4.25623	3.4338	-4.29443
3.4245	-4.28644	3.4245	-4.29114
3.4156	-4.27346	3.4156	-4.288
3.4065	-4.28799	3.4065	-4.2848
3.3973	-4.27984	3.3973	-4.28158
3.388	-4.25659	3.388	-4.27832
3.3787	-4.25884	3.3787	-4.27508
3.3694	-4.24631	3.3694	-4.27185
3.3608	-4.25088	3.3608	-4.26886
3.3422	-4.2452	3.3422	-4.26244
3.3329	-4.25833	3.3329	-4.25924
3.3239	-4.25072	3.3239	-4.25615
3.3147	-4.25557	3.3147	-4.253
3.3057	-4.24073	3.3057	-4.24993
3.2964	-4.24944	3.2964	-4.24677
3.2874	-4.24295	3.2874	-4.24371
3.2781	-4.22443	3.2781	-4.24057
3.2689	-4.23843	3.2689	-4.23746
3.2596	-4.22551	3.2596	-4.23433
3.2506	-4.21461	3.2506	-4.23131
3.2417	-4.21649	3.2417	-4.22833
3.2277	-4.22581	3.2277	-4.22367
3.2137	-4.23741	3.2137	-4.21902
3.2047	-4.20033	3.2047	-4.21604
3.1957	-4.19734	3.1957	-4.21307
3.1864	-4.20553	3.1864	-4.21001
3.1771	-4.19337	3.1771	-4.20696
3.1682	-4.19702	3.1682	-4.20405
3.1588	-4.17167	3.1588	-4.20099
3.1499	-4.1844	3.1499	-4.19809
3.1406	-4.19031	3.1406	-4.19508
3.1313	-4.19687	3.1313	-4.19207
3.1223	-4.1962	3.1223	-4.18917
3.113	-4.16965	3.113	-4.18618
3.0938	-4.1832	3.0938	-4.18004
3.0846	-4.17056	3.0846	-4.17711
3.0759	-4.18575	3.0759	-4.17435
3.0666	-4.15793	3.0666	-4.1714
3.0573	-4.15813	3.0573	-4.16847
3.048	-4.17451	3.048	-4.16554
3.0387	-4.16307	3.0387	-4.16262
3.0297	-4.17639	3.0297	-4.15981
3.0208	-4.16142	3.0208	-4.15703
3.0115	-4.13706	3.0115	-4.15414
3.0021	-4.12931	3.0021	-4.15123
2.9839	-4.13118	2.9839	-4.14561
2.9796	-4.15285	2.9796	-4.14429
2.9656	-4.13164	2.9656	-4.14
2.9566	-4.11794	2.9566	-4.13726
2.9473	-4.11775	2.9473	-4.13443
2.938	-4.13378	2.938	-4.13161
2.9287	-4.13086	2.9287	-4.12879
2.9198	-4.09252	2.9198	-4.12611
2.9108	-4.09865	2.9108	-4.12341
2.9015	-4.09087	2.9015	-4.12062
2.8922	-4.11301	2.8922	-4.11784
2.8829	-4.10264	2.8829	-4.11507
2.865	-4.10701	2.865	-4.10977
2.865	-4.11645	2.865	-4.10977
2.8464	-4.09324	2.8464	-4.1043
2.8375	-4.08249	2.8375	-4.10169
2.8282	-4.09091	2.8282	-4.09897
2.8189	-4.07851	2.8189	-4.09627
2.8099	-4.06521	2.8099	-4.09366
2.8006	-4.08878	2.8006	-4.09097
2.7917	-4.07234	2.7917	-4.0884
2.7824	-4.07497	2.7824	-4.08573
2.7731	-4.07801	2.7731	-4.08307
2.7638	-4.05759	2.7638	-4.08041
2.7551	-4.04149	2.7551	-4.07794
2.7364	-4.06971	2.7364	-4.07265
2.7318	-4.06093	2.7318	-4.07135
2.7182	-4.04671	2.7182	-4.06753
2.7088	-4.06535	2.7088	-4.0649
2.6999	-4.0628	2.6999	-4.06242
2.6906	-4.03949	2.6906	-4.05983
2.6813	-4.03016	2.6813	-4.05726
2.6723	-4.03642	2.6723	-4.05478
2.663	-4.02443	2.663	-4.05222
2.6537	-4.02273	2.6537	-4.04967
2.6402	-4.04539	2.6402	-4.04599
2.6359	-4.03914	2.6359	-4.04482
2.6172	-4.01514	2.6172	-4.03976
2.608	-4.02225	2.608	-4.03728
2.599	-4.04789	2.599	-4.03486
2.5901	-4.02153	2.5901	-4.03248
2.5808	-4.01961	2.5808	-4.03
2.5715	-4.0138	2.5715	-4.02753
2.5622	-3.9972	2.5622	-4.02507
2.5532	-4.00277	2.5532	-4.0227
2.5442	-3.9911	2.5442	-4.02034
2.5349	-4.00986	2.5349	-4.0179
2.5256	-3.98385	2.5256	-4.01548
2.5072	-3.96403	2.5072	-4.0107
2.5072	-3.99407	2.5072	-4.0107
2.489	-3.97996	2.489	-4.00602
2.4797	-3.97195	2.4797	-4.00363
2.4708	-3.97746	2.4708	-4.00136
2.4615	-3.96917	2.4615	-3.999
2.4522	-3.98958	2.4522	-3.99664
2.4429	-3.96771	2.4429	-3.9943
2.4342	-3.95927	2.4342	-3.99211
2.4249	-3.96959	2.4249	-3.98978
2.4156	-3.95216	2.4156	-3.98746
2.4064	-3.95664	2.4064	-3.98518
2.3928	-3.9694	2.3928	-3.98181
2.3791	-3.93919	2.3791	-3.97844
2.3698	-3.94931	2.3698	-3.97617
2.3605	-3.96386	2.3605	-3.9739
2.3516	-3.95354	2.3516	-3.97174
2.3423	-3.94747	2.3423	-3.96949
2.333	-3.94045	2.333	-3.96725
2.324	-3.94378	2.324	-3.96509
2.3151	-3.9226	2.3151	-3.96296
2.3058	-3.93381	2.3058	-3.96074
2.2964	-3.93819	2.2964	-3.95851
2.2828	-3.91606	2.2828	-3.9553
2.2691	-3.91046	2.2691	-3.95209
2.2598	-3.8961	2.2598	-3.94992
2.2506	-3.90662	2.2506	-3.94778
2.2412	-3.90459	2.2412	-3.9456
2.2323	-3.90727	2.2323	-3.94355
2.2233	-3.91146	2.2233	-3.94149
2.214	-3.89963	2.214	-3.93936
2.2047	-3.89897	2.2047	-3.93724
2.1957	-3.892	2.1957	-3.9352
2.1864	-3.87988	2.1864	-3.9331
2.1772	-3.88447	2.1772	-3.93103
2.1682	-3.89357	2.1682	-3.92901
2.149	-3.85818	2.149	-3.92474
2.14	-3.84872	2.14	-3.92275
2.1307	-3.84462	2.1307	-3.92071
2.1214	-3.85002	2.1214	-3.91867
2.1121	-3.87615	2.1121	-3.91664
2.1035	-3.86643	2.1035	-3.91477
2.0942	-3.84016	2.0942	-3.91276
2.0849	-3.85336	2.0849	-3.91075
2.0756	-3.86452	2.0756	-3.90876
2.0573	-3.85174	2.0573	-3.90486
2.0573	-3.84876	2.0573	-3.90486
2.039	-3.83212	2.039	-3.901
2.0297	-3.81568	2.0297	-3.89905
2.0207	-3.80305	2.0207	-3.89717
2.0114	-3.80556	2.0114	-3.89524
2.0022	-3.80761	2.0022	-3.89333
1.9932	-3.81623	1.9932	-3.89148
1.9842	-3.80792	1.9842	-3.88964
1.9749	-3.79604	1.9749	-3.88774
1.9656	-3.84541	1.9656	-3.88585
1.9563	-3.80434	1.9563	-3.88397
1.9474	-3.81166	1.9474	-3.88218
1.9291	-3.79085	1.9291	-3.87852
1.9198	-3.78962	1.9198	-3.87668
1.9105	-3.7906	1.9105	-3.87484
1.9016	-3.78671	1.9016	-3.87309
1.8923	-3.77915	1.8923	-3.87127
1.8833	-3.77998	1.8833	-3.86952
1.874	-3.7742	1.874	-3.86772
1.8651	-3.76303	1.8651	-3.86601
1.8557	-3.75609	1.8557	-3.8642
1.8465	-3.74801	1.8465	-3.86245
1.8328	-3.75678	1.8328	-3.85985
1.8191	-3.74545	1.8191	-3.85727
1.8098	-3.73258	1.8098	-3.85553
1.8006	-3.73521	1.8006	-3.85382
1.7912	-3.75649	1.7912	-3.85208
1.7826	-3.7331	1.7826	-3.8505
1.7733	-3.74284	1.7733	-3.84879
1.764	-3.7114	1.764	-3.8471
1.7547	-3.71306	1.7547	-3.84541
1.7458	-3.70922	1.7458	-3.8438
1.7364	-3.67975	1.7364	-3.84212
1.7228	-3.70979	1.7228	-3.83969
1.7182	-3.69726	1.7182	-3.83888
1.6999	-3.69677	1.6999	-3.83565
1.6906	-3.69415	1.6906	-3.83403
1.6814	-3.67866	1.6814	-3.83243
1.6724	-3.68893	1.6724	-3.83087
1.6635	-3.67111	1.6635	-3.82934
1.6541	-3.65809	1.6541	-3.82774
1.6448	-3.66075	1.6448	-3.82615
1.6355	-3.65626	1.6355	-3.82458
1.6266	-3.65326	1.6266	-3.82309
1.6176	-3.6399	1.6176	-3.82158
1.6083	-3.62264	1.6083	-3.82003
1.59	-3.61218	1.59	-3.81702
1.5806	-3.63655	1.5806	-3.81548
1.5714	-3.60238	1.5714	-3.81399
1.5624	-3.61047	1.5624	-3.81253
1.5531	-3.59944	1.5531	-3.81104
1.5441	-3.58679	1.5441	-3.8096
1.5348	-3.60721	1.5348	-3.80813
1.5255	-3.58625	1.5255	-3.80666
1.5162	-3.57316	1.5162	-3.8052
1.5076	-3.58509	1.5076	-3.80386
1.4937	-3.58418	1.4937	-3.80171
1.4798	-3.57232	1.4798	-3.79958
1.4708	-3.54725	1.4708	-3.79821
1.4619	-3.54181	1.4619	-3.79687
1.4526	-3.5612	1.4526	-3.79547
1.4432	-3.54877	1.4432	-3.79407
1.434	-3.53362	1.434	-3.7927
1.425	-3.52323	1.425	-3.79138
1.4157	-3.52974	1.4157	-3.79002
1.4067	-3.5186	1.4067	-3.78871
1.3974	-3.49822	1.3974	-3.78736
1.3838	-3.49705	1.3838	-3.78541
1.3698	-3.50976	1.3698	-3.78343
1.3604	-3.50217	1.3604	-3.7821
1.3518	-3.47542	1.3518	-3.7809
1.3425	-3.48799	1.3425	-3.77961
1.3332	-3.49005	1.3332	-3.77833
1.3239	-3.46417	1.3239	-3.77705
1.3146	-3.44738	1.3146	-3.77579
1.3057	-3.4461	1.3057	-3.77459
1.2967	-3.43486	1.2967	-3.77338
1.2874	-3.45669	1.2874	-3.77214
1.2781	-3.42448	1.2781	-3.77091
1.2691	-3.43305	1.2691	-3.76973
1.2506	-3.41114	1.2506	-3.76733
1.2416	-3.41956	1.2416	-3.76617
1.2327	-3.43099	1.2327	-3.76504
1.2233	-3.39189	1.2233	-3.76385
1.214	-3.39068	1.214	-3.76268
1.2047	-3.38293	1.2047	-3.76152
1.1954	-3.37621	1.1954	-3.76037
1.1868	-3.3663	1.1868	-3.75931
1.1775	-3.36995	1.1775	-3.75818
1.1682	-3.36911	1.1682	-3.75706
1.159	-3.34391	1.159	-3.75595
1.1499	-3.33337	1.1499	-3.75487
1.1363	-3.32749	1.1363	-3.75327
1.1224	-3.33009	1.1224	-3.75165
1.1134	-3.31748	1.1134	-3.75061
1.1041	-3.29266	1.1041	-3.74955
1.0948	-3.29676	1.0948	-3.7485
1.0858	-3.29409	1.0858	-3.74748
1.0766	-3.2924	1.0766	-3.74646
1.0676	-3.28314	1.0676	-3.74546
1.0583	-3.27497	1.0583	-3.74444
1.0443	-3.26175	1.0443	-3.74293
1.0311	-3.24768	1.0311	-3.74152
1.0218	-3.25495	1.0218	-3.74053
1.0125	-3.23966	1.0125	-3.73956
1.0032	-3.21648	1.0032	-3.73859
0.9942	-3.20583	0.9942	-3.73766
0.985	-3.21024	0.985	-3.73673
0.976	-3.20347	0.976	-3.73582
0.9667	-3.19503	0.9667	-3.73488
0.9568	-3.18578	0.9568	-3.7339
0.9474	-3.16529	0.9474	-3.73298
0.9338	-3.16843	0.9338	-3.73166
0.9292	-3.16437	0.9292	-3.73122
0.9108	-3.15989	0.9108	-3.72948
0.9018	-3.15294	0.9018	-3.72863
0.8925	-3.14719	0.8925	-3.72777
0.8832	-3.12517	0.8832	-3.72692
0.8739	-3.11923	0.8739	-3.72608
0.8649	-3.0949	0.8649	-3.72527
0.856	-3.09304	0.856	-3.72449
0.8467	-3.10492	0.8467	-3.72367
0.8374	-3.06009	0.8374	-3.72286
0.8281	-3.08344	0.8281	-3.72206
0.8191	-3.04556	0.8191	-3.7213
0.8098	-3.0559	0.8098	-3.72052
0.8009	-3.03568	0.8009	-3.71978
0.783	-3.02756	0.783	-3.71832
0.774	-3.0258	0.774	-3.7176
0.765	-3.00641	0.765	-3.71688
0.7561	-3.00565	0.7561	-3.71618
0.7468	-2.99969	0.7468	-3.71546
0.7375	-3.00958	0.7375	-3.71475
0.7282	-3.00451	0.7282	-3.71405
0.7189	-2.96578	0.7189	-3.71336
0.7106	-2.98092	0.7106	-3.71275
0.697	-2.96462	0.697	-3.71176
0.6924	-2.95241	0.6924	-3.71143
0.6743	-2.94269	0.6743	-3.71015
0.665	-2.94787	0.665	-3.70951
0.6557	-2.9289	0.6557	-3.70888
0.6467	-2.91958	0.6467	-3.70828
0.6374	-2.92108	0.6374	-3.70766
0.6281	-2.91472	0.6281	-3.70705
0.6198	-2.88473	0.6198	-3.70652
0.6109	-2.8779	0.6109	-3.70595
0.6016	-2.87438	0.6016	-3.70537
0.5923	-2.87665	0.5923	-3.7048
0.5744	-2.85781	0.5744	-3.70372
0.5698	-2.84411	0.5698	-3.70345
0.5561	-2.84456	0.5561	-3.70266
0.5472	-2.83471	0.5472	-3.70215
0.5385	-2.83626	0.5385	-3.70167
0.5292	-2.8197	0.5292	-3.70115
0.5199	-2.8249	0.5199	-3.70065
0.5109	-2.81518	0.5109	-3.70017
0.5017	-2.79617	0.5017	-3.69969
0.4927	-2.80017	0.4927	-3.69923
0.484	-2.79425	0.484	-3.69879
0.4658	-2.78147	0.4658	-3.6979
0.4564	-2.75508	0.4564	-3.69746
0.4474	-2.76873	0.4474	-3.69704
0.4388	-2.75998	0.4388	-3.69664
0.4299	-2.75153	0.4299	-3.69625
0.4206	-2.7405	0.4206	-3.69584
0.4119	-2.7377	0.4119	-3.69546
0.4026	-2.72934	0.4026	-3.69507
0.3933	-2.71978	0.3933	-3.69469
0.3847	-2.7074	0.3847	-3.69435
0.3668	-2.69882	0.3668	-3.69365
0.3575	-2.69033	0.3575	-3.69331
0.3482	-2.68405	0.3482	-3.69297
0.3392	-2.67862	0.3392	-3.69265
0.3302	-2.69489	0.3302	-3.69234
0.3216	-2.68486	0.3216	-3.69205
0.3127	-2.67415	0.3127	-3.69176
0.3034	-2.67056	0.3034	-3.69146
0.2941	-2.67581	0.2941	-3.69118
0.2765	-2.64325	0.2765	-3.69066
0.2765	-2.64343	0.2765	-3.69066
0.2582	-2.65271	0.2582	-3.69016
0.2493	-2.655	0.2493	-3.68992
0.2403	-2.6321	0.2403	-3.6897
0.231	-2.64104	0.231	-3.68947
0.2219	-2.62453	0.2219	-3.68926
0.2133	-2.61776	0.2133	-3.68906
0.204	-2.62964	0.204	-3.68886
0.1951	-2.62893	0.1951	-3.68868
0.1768	-2.61841	0.1768	-3.68833
0.1678	-2.62169	0.1678	-3.68817
0.1592	-2.62323	0.1592	-3.68803
0.1502	-2.61119	0.1502	-3.68788
0.1409	-2.60808	0.1409	-3.68774
0.1316	-2.59945	0.1316	-3.68761
0.123	-2.59177	0.123	-3.6875
0.1144	-2.61348	0.1144	-3.68739
0.1051	-2.60798	0.1051	-3.68729
0.0865	-2.60412	0.0865	-3.68711
0.0776	-2.58749	0.0776	-3.68703
0.0689	-2.5657	0.0689	-3.68696
0.0599	-2.58538	0.0599	-3.6869
0.051	-2.59651	0.051	-3.68685
0.0417	-2.58416	0.0417	-3.68681
0.0328	-2.59221	0.0328	-3.68678
0.0241	-2.60678	0.0241	-3.68675
0.0151	-2.60152	0.0151	-3.68673
0.0059	-2.60354	0.0059	-3.68672
-0.0059	-2.60354	-0.0059	-3.68672
-0.0151	-2.60152	-0.0151	-3.68673
-0.0241	-2.60678	-0.0241	-3.68675
-0.0328	-2.59221	-0.0328	-3.68678
-0.0417	-2.58416	-0.0417	-3.68681
-0.051	-2.59651	-0.051	-3.68685
-0.0599	-2.58538	-0.0599	-3.6869
-0.0689	-2.5657	-0.0689	-3.68696
-0.0776	-2.58749	-0.0776	-3.68703
-0.0865	-2.60412	-0.0865	-3.68711
-0.1051	-2.60798	-0.1051	-3.68729
-0.1144	-2.61348	-0.1144	-3.68739
-0.123	-2.59177	-0.123	-3.6875
-0.1316	-2.59945	-0.1316	-3.68761
-0.1409	-2.60808	-0.1409	-3.68774
-0.1502	-2.61119	-0.1502	-3.68788
-0.1592	-2.62323	-0.1592	-3.68803
-0.1678	-2.62169	-0.1678	-3.68817
-0.1768	-2.61841	-0.1768	-3.68833
-0.1951	-2.62893	-0.1951	-3.68868
-0.204	-2.62964	-0.204	-3.68886
-0.2133	-2.61776	-0.2133	-3.68906
-0.2219	-2.62453	-0.2219	-3.68926
-0.231	-2.64104	-0.231	-3.68947
-0.2403	-2.6321	-0.2403	-3.6897
-0.2493	-2.655	-0.2493	-3.68992
-0.2582	-2.65271	-0.2582	-3.69016
-0.2765	-2.64343	-0.2765	-3.69066
-0.2765	-2.64325	-0.2765	-3.69066
-0.2941	-2.67581	-0.2941	-3.69118
-0.3034	-2.67056	-0.3034	-3.69146
-0.3127	-2.67415	-0.3127	-3.69176
-0.3216	-2.68486	-0.3216	-3.69205
-0.3302	-2.69489	-0.3302	-3.69234
-0.3392	-2.67862	-0.3392	-3.69265
-0.3482	-2.68405	-0.3482	-3.69297
-0.3575	-2.69033	-0.3575	-3.69331
-0.3668	-2.69882	-0.3668	-3.69365
-0.3847	-2.7074	-0.3847	-3.69435
-0.3933	-2.71978	-0.3933	-3.69469
-0.4026	-2.72934	-0.4026	-3.69507
-0.4119	-2.7377	-0.4119	-3.69546
-0.4206	-2.7405	-0.4206	-3.69584
-0.4299	-2.75153	-0.4299	-3.69625
-0.4388	-2.75998	-0.4388	-3.69664
-0.4474	-2.76873	-0.4474	-3.69704
-0.4564	-2.75508	-0.4564	-3.69746
-0.4658	-2.78147	-0.4658	-3.6979
-0.484	-2.79425	-0.484	-3.69879
-0.4927	-2.80017	-0.4927	-3.69923
-0.5017	-2.79617	-0.5017	-3.69969
-0.5109	-2.81518	-0.5109	-3.70017
-0.5199	-2.8249	-0.5199	-3.70065
-0.5292	-2.8197	-0.5292	-3.70115
-0.5385	-2.83626	-0.5385	-3.70167
-0.5472	-2.83471	-0.5472	-3.70215
-0.5561	-2.84456	-0.5561	-3.70266
-0.5698	-2.84411	-0.5698	-3.70345
-0.5744	-2.85781	-0.5744	-3.70372
-0.5923	-2.87665	-0.5923	-3.7048
-0.6016	-2.87438	-0.6016	-3.70537
-0.6109	-2.8779	-0.6109	-3.70595
-0.6198	-2.88473	-0.6198	-3.70652
-0.6281	-2.91472	-0.6281	-3.70705
-0.6374	-2.92108	-0.6374	-3.70766
-0.6467	-2.91958	-0.6467	-3.70828
-0.6557	-2.9289	-0.6557	-3.70888
-0.665	-2.94787	-0.665	-3.70951
-0.6743	-2.94269	-0.6743	-3.71015
-0.6924	-2.95241	-0.6924	-3.71143
-0.697	-2.96462	-0.697	-3.71176
-0.7106	-2.98092	-0.7106	-3.71275
-0.7189	-2.96578	-0.7189	-3.71336
-0.7282	-3.00451	-0.7282	-3.71405
-0.7375	-3.00958	-0.7375	-3.71475
-0.7468	-2.99969	-0.7468	-3.71546
-0.7561	-3.00565	-0.7561	-3.71618
-0.765	-3.00641	-0.765	-3.71688
-0.774	-3.0258	-0.774	-3.7176
-0.783	-3.02756	-0.783	-3.71832
-0.8009	-3.03568	-0.8009	-3.71978
-0.8098	-3.0559	-0.8098	-3.72052
-0.8191	-3.04556	-0.8191	-3.7213
-0.8281	-3.08344	-0.8281	-3.72206
-0.8374	-3.06009	-0.8374	-3.72286
-0.8467	-3.10492	-0.8467	-3.72367
-0.856	-3.09304	-0.856	-3.72449
-0.8649	-3.0949	-0.8649	-3.72527
-0.8739	-3.11923	-0.8739	-3.72608
-0.8832	-3.12517	-0.8832	-3.72692
-0.8925	-3.14719	-0.8925	-3.72777
-0.9018	-3.15294	-0.9018	-3.72863
-0.9108	-3.15989	-0.9108	-3.72948
-0.9292	-3.16437	-0.9292	-3.73122
-0.9338	-3.16843	-0.9338	-3.73166
-0.9474	-3.16529	-0.9474	-3.73298
-0.9568	-3.18578	-0.9568	-3.7339
-0.9667	-3.19503	-0.9667	-3.73488
-0.976	-3.20347	-0.976	-3.73582
-0.985	-3.21024	-0.985	-3.73673
-0.9942	-3.20583	-0.9942	-3.73766
-1.0032	-3.21648	-1.0032	-3.73859
-1.0125	-3.23966	-1.0125	-3.73956
-1.0218	-3.25495	-1.0218	-3.74053
-1.0311	-3.24768	-1.0311	-3.74152
-1.0443	-3.26175	-1.0443	-3.74293
-1.0583	-3.27497	-1.0583	-3.74444
-1.0676	-3.28314	-1.0676	-3.74546
-1.0766	-3.2924	-1.0766	-3.74646
-1.0858	-3.29409	-1.0858	-3.74748
-1.0948	-3.29676	-1.0948	-3.7485
-1.1041	-3.29266	-1.1041	-3.74955
-1.1134	-3.31748	-1.1134	-3.75061
-1.1224	-3.33009	-1.1224	-3.75165
-1.1363	-3.32749	-1.1363	-3.75327
-1.1499	-3.33337	-1.1499	-3.75487
-1.159	-3.34391	-1.159	-3.75595
-1.1682	-3.36911	-1.1682	-3.75706
-1.1775	-3.36995	-1.1775	-3.75818
-1.1868	-3.3663	-1.1868	-3.75931
-1.1954	-3.37621	-1.1954	-3.76037
-1.2047	-3.38293	-1.2047	-3.76152
-1.214	-3.39068	-1.214	-3.76268
-1.2233	-3.39189	-1.2233	-3.76385
-1.2327	-3.43099	-1.2327	-3.76504
-1.2416	-3.41956	-1.2416	-3.76617
-1.2506	-3.41114	-1.2506	-3.76733
-1.2691	-3.43305	-1.2691	-3.76973
-1.2781	-3.42448	-1.2781	-3.77091
-1.2874	-3.45669	-1.2874	-3.77214
-1.2967	-3.43486	-1.2967	-3.77338
-1.3057	-3.4461	-1.3057	-3.77459
-1.3146	-3.44738	-1.3146	-3.77579
-1.3239	-3.46417	-1.3239	-3.77705
-1.3332	-3.49005	-1.3332	-3.77833
-1.3425	-3.48799	-1.3425	-3.77961
-1.3518	-3.47542	-1.3518	-3.7809
-1.3604	-3.50217	-1.3604	-3.7821
-1.3698	-3.50976	-1.3698	-3.78343
-1.3838	-3.49705	-1.3838	-3.78541
-1.3974	-3.49822	-1.3974	-3.78736
-1.4067	-3.5186	-1.4067	-3.78871
-1.4157	-3.52974	-1.4157	-3.79002
-1.425	-3.52323	-1.425	-3.79138
-1.434	-3.53362	-1.434	-3.7927
-1.4432	-3.54877	-1.4432	-3.79407
-1.4526	-3.5612	-1.4526	-3.79547
-1.4619	-3.54181	-1.4619	-3.79687
-1.4708	-3.54725	-1.4708	-3.79821
-1.4798	-3.57232	-1.4798	-3.79958
-1.4937	-3.58418	-1.4937	-3.80171
-1.5076	-3.58509	-1.5076	-3.80386
-1.5162	-3.57316	-1.5162	-3.8052
-1.5255	-3.58625	-1.5255	-3.80666
-1.5348	-3.60721	-1.5348	-3.80813
-1.5441	-3.58679	-1.5441	-3.8096
-1.5531	-3.59944	-1.5531	-3.81104
-1.5624	-3.61047	-1.5624	-3.81253
-1.5714	-3.60238	-1.5714	-3.81399
-1.5806	-3.63655	-1.5806	-3.81548
-1.59	-3.61218	-1.59	-3.81702
-1.6083	-3.62264	-1.6083	-3.82003
-1.6176	-3.6399	-1.6176	-3.82158
-1.6266	-3.65326	-1.6266	-3.82309
-1.6355	-3.65626	-1.6355	-3.82458
-1.6448	-3.66075	-1.6448	-3.82615
-1.6541	-3.65809	-1.6541	-3.82774
-1.6635	-3.67111	-1.6635	-3.82934
-1.6724	-3.68893	-1.6724	-3.83087
-1.6814	-3.67866	-1.6814	-3.83243
-1.6906	-3.69415	-1.6906	-3.83403
-1.6999	-3.69677	-1.6999	-3.83565
-1.7182	-3.69726	-1.7182	-3.83888
-1.7228	-3.70979	-1.7228	-3.83969
-1.7364	-3.67975	-1.7364	-3.84212
-1.7458	-3.70922	-1.7458	-3.8438
-1.7547	-3.71306	-1.7547	-3.84541
-1.764	-3.7114	-1.764	-3.8471
-1.7733	-3.74284	-1.7733	-3.84879
-1.7826	-3.7331	-1.7826	-3.8505
-1.7912	-3.75649	-1.7912	-3.85208
-1.8006	-3.73521	-1.8006	-3.85382
-1.8098	-3.73258	-1.8098	-3.85553
-1.8191	-3.74545	-1.8191	-3.85727
-1.8328	-3.75678	-1.8328	-3.85985
-1.8465	-3.74801	-1.8465	-3.86245
-1.8557	-3.75609	-1.8557	-3.8642
-1.8651	-3.76303	-1.8651	-3.86601
-1.874	-3.7742	-1.874	-3.86772
-1.8833	-3.77998	-1.8833	-3.86952
-1.8923	-3.77915	-1.8923	-3.87127
-1.9016	-3.78671	-1.9016	-3.87309
-1.9105	-3.7906	-1.9105	-3.87484
-1.9198	-3.78962	-1.9198	-3.87668
-1.9291	-3.79085	-1.9291	-3.87852
-1.9474	-3.81166	-1.9474	-3.88218
-1.9563	-3.80434	-1.9563	-3.88397
-1.9656	-3.84541	-1.9656	-3.88585
-1.9749	-3.79604	-1.9749	-3.88774
-1.9842	-3.80792	-1.9842	-3.88964
-1.9932	-3.81623	-1.9932	-3.89148
-2.0022	-3.80761	-2.0022	-3.89333
-2.0114	-3.80556	-2.0114	-3.89524
-2.0207	-3.80305	-2.0207	-3.89717
-2.0297	-3.81568	-2.0297	-3.89905
-2.039	-3.83212	-2.039	-3.901
-2.0573	-3.84876	-2.0573	-3.90486
-2.0573	-3.85174	-2.0573	-3.90486
-2.0756	-3.86452	-2.0756	-3.90876
-2.0849	-3.85336	-2.0849	-3.91075
-2.0942	-3.84016	-2.0942	-3.91276
-2.1035	-3.86643	-2.1035	-3.91477
-2.1121	-3.87615	-2.1121	-3.91664
-2.1214	-3.85002	-2.1214	-3.91867
-2.1307	-3.84462	-2.1307	-3.92071
-2.14	-3.84872	-2.14	-3.92275
-2.149	-3.85818	-2.149	-3.92474
-2.1682	-3.89357	-2.1682	-3.92901
-2.1772	-3.88447	-2.1772	-3.93103
-2.1864	-3.87988	-2.1864	-3.9331
-2.1957	-3.892	-2.1957	-3.9352
-2.2047	-3.89897	-2.2047	-3.93724
-2.214	-3.89963	-2.214	-3.93936
-2.2233	-3.91146	-2.2233	-3.94149
-2.2323	-3.90727	-2.2323	-3.94355
-2.2412	-3.90459	-2.2412	-3.9456
-2.2506	-3.90662	-2.2506	-3.94778
-2.2598	-3.8961	-2.2598	-3.94992
-2.2691	-3.91046	-2.2691	-3.95209
-2.2828	-3.91606	-2.2828	-3.9553
-2.2964	-3.93819	-2.2964	-3.95851
-2.3058	-3.93381	-2.3058	-3.96074
-2.3151	-3.9226	-2.3151	-3.96296
-2.324	-3.94378	-2.324	-3.96509
-2.333	-3.94045	-2.333	-3.96725
-2.3423	-3.94747	-2.3423	-3.96949
-2.3516	-3.95354	-2.3516	-3.97174
-2.3605	-3.96386	-2.3605	-3.9739
-2.3698	-3.94931	-2.3698	-3.97617
-2.3791	-3.93919	-2.3791	-3.97844
-2.3928	-3.9694	-2.3928	-3.98181
-2.4064	-3.95664	-2.4064	-3.98518
-2.4156	-3.95216	-2.4156	-3.98746
-2.4249	-3.96959	-2.4249	-3.98978
-2.4342	-3.95927	-2.4342	-3.99211
-2.4429	-3.96771	-2.4429	-3.9943
-2.4522	-3.98958	-2.4522	-3.99664
-2.4615	-3.96917	-2.4615	-3.999
-2.4708	-3.97746	-2.4708	-4.00136
-2.4797	-3.97195	-2.4797	-4.00363
-2.489	-3.97996	-2.489	-4.00602
-2.5072	-3.99407	-2.5072	-4.0107
-2.5072	-3.96403	-2.5072	-4.0107
-2.5256	-3.98385	-2.5256	-4.01548
-2.5349	-4.00986	-2.5349	-4.0179
-2.5442	-3.9911	-2.5442	-4.02034
-2.5532	-4.00277	-2.5532	-4.0227
-2.5622	-3.9972	-2.5622	-4.02507
-2.5715	-4.0138	-2.5715	-4.02753
-2.5808	-4.01961	-2.5808	-4.03
-2.5901	-4.02153	-2.5901	-4.03248
-2.599	-4.04789	-2.599	-4.03486
-2.608	-4.02225	-2.608	-4.03728
-2.6172	-4.01514	-2.6172	-4.03976
-2.6359	-4.03914	-2.6359	-4.04482
-2.6402	-4.04539	-2.6402	-4.04599
-2.6537	-4.02273	-2.6537	-4.04967
-2.663	-4.02443	-2.663	-4.05222
-2.6723	-4.03642	-2.6723	-4.05478
-2.6813	-4.03016	-2.6813	-4.05726
-2.6906	-4.03949	-2.6906	-4.05983
-2.6999	-4.0628	-2.6999	-4.06242
-2.7088	-4.06535	-2.7088	-4.0649
-2.7182	-4.04671	-2.7182	-4.06753
-2.7318	-4.06093	-2.7318	-4.07135
-2.7364	-4.06971	-2.7364	-4.07265
-2.7551	-4.04149	-2.7551	-4.07794
-2.7638	-4.05759	-2.7638	-4.08041
-2.7731	-4.07801	-2.7731	-4.08307
-2.7824	-4.07497	-2.7824	-4.08573
-2.7917	-4.07234	-2.7917	-4.0884
-2.8006	-4.08878	-2.8006	-4.09097
-2.8099	-4.06521	-2.8099	-4.09366
-2.8189	-4.07851	-2.8189	-4.09627
-2.8282	-4.09091	-2.8282	-4.09897
-2.8375	-4.08249	-2.8375	-4.10169
-2.8464	-4.09324	-2.8464	-4.1043
-2.865	-4.11645	-2.865	-4.10977
-2.865	-4.10701	-2.865	-4.10977
-2.8829	-4.10264	-2.8829	-4.11507
-2.8922	-4.11301	-2.8922	-4.11784
-2.9015	-4.09087	-2.9015	-4.12062
-2.9108	-4.09865	-2.9108	-4.12341
-2.9198	-4.09252	-2.9198	-4.12611
-2.9287	-4.13086	-2.9287	-4.12879
-2.938	-4.13378	-2.938	-4.13161
-2.9473	-4.11775	-2.9473	-4.13443
-2.9566	-4.11794	-2.9566	-4.13726
-2.9656	-4.13164	-2.9656	-4.14
-2.9796	-4.15285	-2.9796	-4.14429
-2.9839	-4.13118	-2.9839	-4.14561
-3.0021	-4.12931	-3.0021	-4.15123
-3.0115	-4.13706	-3.0115	-4.15414
-3.0208	-4.16142	-3.0208	-4.15703
-3.0297	-4.17639	-3.0297	-4.15981
-3.0387	-4.16307	-3.0387	-4.16262
-3.048	-4.17451	-3.048	-4.16554
-3.0573	-4.15813	-3.0573	-4.16847
-3.0666	-4.15793	-3.0666	-4.1714
-3.0759	-4.18575	-3.0759	-4.17435
-3.0846	-4.17056	-3.0846	-4.17711
-3.0938	-4.1832	-3.0938	-4.18004
-3.113	-4.16965	-3.113	-4.18618
-3.1223	-4.1962	-3.1223	-4.18917
-3.1313	-4.19687	-3.1313	-4.19207
-3.1406	-4.19031	-3.1406	-4.19508
-3.1499	-4.1844	-3.1499	-4.19809
-3.1588	-4.17167	-3.1588	-4.20099
-3.1682	-4.19702	-3.1682	-4.20405
-3.1771	-4.19337	-3.1771	-4.20696
-3.1864	-4.20553	-3.1864	-4.21001
-3.1957	-4.19734	-3.1957	-4.21307
-3.2047	-4.20033	-3.2047	-4.21604
-3.2137	-4.23741	-3.2137	-4.21902
-3.2277	-4.22581	-3.2277	-4.22367
-3.2417	-4.21649	-3.2417	-4.22833
-3.2506	-4.21461	-3.2506	-4.23131
-3.2596	-4.22551	-3.2596	-4.23433
-3.2689	-4.23843	-3.2689	-4.23746
-3.2781	-4.22443	-3.2781	-4.24057
-3.2874	-4.24295	-3.2874	-4.24371
-3.2964	-4.24944	-3.2964	-4.24677
-3.3057	-4.24073	-3.3057	-4.24993
-3.3147	-4.25557	-3.3147	-4.253
-3.3239	-4.25072	-3.3239	-4.25615
-3.3329	-4.25833	-3.3329	-4.25924
-3.3422	-4.2452	-3.3422	-4.26244
-3.3608	-4.25088	-3.3608	-4.26886
-3.3694	-4.24631	-3.3694	-4.27185
-3.3787	-4.25884	-3.3787	-4.27508
-3.388	-4.25659	-3.388	-4.27832
-3.3973	-4.27984	-3.3973	-4.28158
-3.4065	-4.28799	-3.4065	-4.2848
-3.4156	-4.27346	-3.4156	-4.288
-3.4245	-4.28644	-3.4245	-4.29114
-3.4338	-4.25623	-3.4338	-4.29443
-3.4432	-4.27671	-3.4432	-4.29776
-3.4521	-4.29107	-3.4521	-4.30092
-3.4614	-4.28204	-3.4614	-4.30424
-3.4707	-4.31913	-3.4707	-4.30756
-3.4886	-4.29721	-3.4886	-4.31398
-3.4933	-4.29537	-3.4933	-4.31567
-3.5072	-4.31598	-3.5072	-4.32069
-3.5165	-4.30673	-3.5165	-4.32405
-3.5258	-4.30234	-3.5258	-4.32743
-3.5344	-4.3132	-3.5344	-4.33056
-3.5438	-4.31254	-3.5438	-4.33399
-3.5531	-4.32329	-3.5531	-4.33739
-3.5623	-4.29381	-3.5623	-4.34076
-3.5713	-4.33143	-3.5713	-4.34407
-3.5849	-4.34187	-3.5849	-4.34909
-3.5988	-4.34951	-3.5988	-4.35423
-3.6081	-4.35285	-3.6081	-4.35769
-3.6171	-4.32843	-3.6171	-4.36104
-3.6264	-4.31496	-3.6264	-4.36451
-3.6354	-4.34204	-3.6354	-4.36788
-3.6447	-4.34253	-3.6447	-4.37137
-3.6537	-4.36683	-3.6537	-4.37475
-3.663	-4.36498	-3.663	-4.37826
-3.6723	-4.36634	-3.6723	-4.38178
-3.6816	-4.369	-3.6816	-4.3853
-3.6996	-4.39415	-3.6996	-4.39215
-3.7095	-4.37124	-3.7095	-4.39593
-3.7188	-4.38354	-3.7188	-4.39949
-3.7281	-4.3621	-3.7281	-4.40306
-3.7374	-4.37963	-3.7374	-4.40664
-3.7464	-4.4066	-3.7464	-4.41011
-3.7553	-4.41572	-3.7553	-4.41355
-3.7646	-4.39908	-3.7646	-4.41716
-3.774	-4.40724	-3.774	-4.42081
-3.7829	-4.41075	-3.7829	-4.42427
-3.7921	-4.41611	-3.7921	-4.42787
-3.8014	-4.41916	-3.8014	-4.43151
-3.8104	-4.42828	-3.8104	-4.43504
-3.8287	-4.43476	-3.8287	-4.44224
-3.8379	-4.41964	-3.8379	-4.44588
-3.8472	-4.43722	-3.8472	-4.44956
-3.8565	-4.44106	-3.8565	-4.45325
-3.8652	-4.42727	-3.8652	-4.45672
-3.8745	-4.4206	-3.8745	-4.46043
-3.8838	-4.44489	-3.8838	-4.46414
-3.8931	-4.46506	-3.8931	-4.46787
-3.9021	-4.46325	-3.9021	-4.47149
-3.9204	-4.47184	-3.9204	-4.47887
-3.9297	-4.4791	-3.9297	-4.48263
-3.9387	-4.48867	-3.9387	-4.48628
-3.9479	-4.47231	-3.9479	-4.49002
-3.9573	-4.47218	-3.9573	-4.49385
-3.9666	-4.46344	-3.9666	-4.49765
-3.9755	-4.48432	-3.9755	-4.50129
-3.9845	-4.48223	-3.9845	-4.50498
-3.9938	-4.47213	-3.9938	-4.50881
-4.0031	-4.49499	-4.0031	-4.51264
-4.0124	-4.51381	-4.0124	-4.51648
-4.0213	-4.51514	-4.0213	-4.52017
-4.0302	-4.51013	-4.0302	-4.52386
-4.0489	-4.51399	-4.0489	-4.53165
-4.0535	-4.50301	-4.0535	-4.53357
-4.0671	-4.47702	-4.0671	-4.53926
-4.0764	-4.50978	-4.0764	-4.54316
-4.0853	-4.54334	-4.0853	-4.54691
-4.0947	-4.52244	-4.0947	-4.55087
-4.1036	-4.52444	-4.1036	-4.55463
-4.113	-4.54602	-4.113	-4.55861
-4.1223	-4.52796	-4.1223	-4.56256
-4.1312	-4.53472	-4.1312	-4.56634
-4.1403	-4.55062	-4.1403	-4.57022
-4.1496	-4.53209	-4.1496	-4.5742
-4.1682	-4.54909	-4.1682	-4.58217
-4.1682	-4.56121	-4.1682	-4.58217
-4.1861	-4.54935	-4.1861	-4.58988
-4.1954	-4.56244	-4.1954	-4.5939
-4.2047	-4.56548	-4.2047	-4.59792
-4.214	-4.57032	-4.214	-4.60196
-4.2229	-4.56873	-4.2229	-4.60583
-4.2323	-4.60375	-4.2323	-4.60992
-4.2412	-4.60266	-4.2412	-4.61381
-4.2505	-4.60443	-4.2505	-4.61788
-4.2595	-4.58822	-4.2595	-4.62183
-4.278	-4.6052	-4.278	-4.62997
-4.2873	-4.59922	-4.2873	-4.63407
-4.2963	-4.62674	-4.2963	-4.63806
-4.3052	-4.62	-4.3052	-4.642
-4.3145	-4.61655	-4.3145	-4.64613
-4.3238	-4.63147	-4.3238	-4.65027
-4.3331	-4.63831	-4.3331	-4.65442
-4.3421	-4.61336	-4.3421	-4.65845
-4.3511	-4.63663	-4.3511	-4.66248
-4.3604	-4.64389	-4.3604	-4.66665
-4.3697	-4.65358	-4.3697	-4.67084
-4.3887	-4.66638	-4.3887	-4.67942
-4.398	-4.67293	-4.398	-4.68363
-4.4073	-4.66169	-4.4073	-4.68785
-4.4162	-4.64374	-4.4162	-4.6919
-4.4255	-4.67958	-4.4255	-4.69613
-4.4345	-4.67103	-4.4345	-4.70024
-4.4438	-4.69753	-4.4438	-4.7045
-4.4531	-4.6855	-4.4531	-4.70876
-4.4624	-4.69729	-4.4624	-4.71304
-4.471	-4.72058	-4.471	-4.717
-4.4802	-4.72052	-4.4802	-4.72124
-4.4989	-4.71903	-4.4989	-4.72989
-4.4989	-4.69108	-4.4989	-4.72989
-4.5171	-4.73299	-4.5171	-4.73835
-4.5261	-4.72213	-4.5261	-4.74255
-4.5354	-4.73201	-4.5354	-4.74689
-4.5447	-4.73545	-4.5447	-4.75124
-4.5547	-4.73897	-4.5547	-4.75593
-4.5636	-4.73389	-4.5636	-4.76011
-4.573	-4.73083	-4.573	-4.76454
-4.5822	-4.75101	-4.5822	-4.76888
-4.5913	-4.74437	-4.5913	-4.77319
-4.6002	-4.75096	-4.6002	-4.7774
-4.6095	-4.77164	-4.6095	-4.78182
-4.6188	-4.7721	-4.6188	-4.78624
-4.6281	-4.78068	-4.6281	-4.79067
-4.6461	-4.7641	-4.6461	-4.79928
-4.6553	-4.77095	-4.6553	-4.80369
-4.6646	-4.81229	-4.6646	-4.80815
-4.6739	-4.81109	-4.6739	-4.81263
-4.6829	-4.81207	-4.6829	-4.81697
-4.6922	-4.8149	-4.6922	-4.82146
-4.7012	-4.81678	-4.7012	-4.82582
-4.7104	-4.80885	-4.7104	-4.83028
-4.7194	-4.81468	-4.7194	-4.83466
-4.7287	-4.82877	-4.7287	-4.83919
-4.738	-4.83151	-4.738	-4.84372
-4.7563	-4.82405	-4.7563	-4.85268
-4.7606	-4.8322	-4.7606	-4.85479
-4.7745	-4.86533	-4.7745	-4.86162
-4.7838	-4.86669	-4.7838	-4.8662
-4.7938	-4.87454	-4.7938	-4.87114
-4.8031	-4.85033	-4.8031	-4.87574
-4.812	-4.84354	-4.812	-4.88015
-4.821	-4.85532	-4.821	-4.88461
-4.8304	-4.88771	-4.8304	-4.88929
-4.8397	-4.90124	-4.8397	-4.89393
-4.8486	-4.89519	-4.8486	-4.89837
-4.8579	-4.88352	-4.8579	-4.90302
-4.8672	-4.89463	-4.8672	-4.90768
-4.8855	-4.91329	-4.8855	-4.91688
-4.8944	-4.91849	-4.8944	-4.92137
-4.9037	-4.91436	-4.9037	-4.92606
-4.913	-4.92351	-4.913	-4.93077
-4.922	-4.91458	-4.922	-4.93533
-4.931	-4.95226	-4.931	-4.9399
-4.9402	-4.9231	-4.9402	-4.94458
-4.9495	-4.93004	-4.9495	-4.94932
-4.9588	-4.95415	-4.9588	-4.95407
-4.9688	-4.92572	-4.9688	-4.95919
-4.9781	-4.94871	-4.9781	-4.96396
-4.996	-4.97143	-4.996	-4.97316
-5.0053	-4.96685	-5.0053	-4.97795
-5.0146	-4.9526	-5.0146	-4.98276
-5.0236	-4.96942	-5.0236	-4.98741
-5.0329	-4.96856	-5.0329	-4.99223
-5.0422	-4.95788	-5.0422	-4.99706
-5.0512	-4.98209	-5.0512	-5.00174
-5.0602	-5.00502	-5.0602	-5.00643
-5.0695	-5.00269	-5.0695	-5.01129
-5.0788	-4.9959	-5.0788	-5.01615
-5.0881	-5.00564	-5.0881	-5.02103
-5.0974	-5.0401	-5.0974	-5.02591
-5.1107	-5.01601	-5.1107	-5.03291
-5.1246	-5.01651	-5.1246	-5.04024
-5.1339	-5.02466	-5.1339	-5.04516
-5.1428	-5.06105	-5.1428	-5.04987
-5.1518	-5.05477	-5.1518	-5.05465
-5.1611	-5.09379	-5.1611	-5.05959
-5.1704	-5.06348	-5.1704	-5.06454
-5.1793	-5.07025	-5.1793	-5.06929
-5.1886	-5.07525	-5.1886	-5.07426
-5.1979	-5.08243	-5.1979	-5.07924
-5.2069	-5.08152	-5.2069	-5.08406
-5.2162	-5.10722	-5.2162	-5.08906
-5.2255	-5.10717	-5.2255	-5.09406
-5.2398	-5.11281	-5.2398	-5.10178
-5.2444	-5.12269	-5.2444	-5.10426
-5.263	-5.14203	-5.263	-5.11434
-5.272	-5.15151	-5.272	-5.11922
-5.281	-5.1278	-5.281	-5.12412
-5.2903	-5.13277	-5.2903	-5.12918
-5.2996	-5.11335	-5.2996	-5.13426
-5.3086	-5.14933	-5.3086	-5.13918
-5.3179	-5.14991	-5.3179	-5.14427
-5.3268	-5.19083	-5.3268	-5.14916
-5.3361	-5.17582	-5.3361	-5.15427
-5.3454	-5.18818	-5.3454	-5.15939
-5.3544	-5.16863	-5.3544	-5.16435
-5.373	-5.18557	-5.373	-5.17463
-5.3829	-5.16835	-5.3829	-5.18012
-5.3923	-5.17529	-5.3923	-5.18534
-5.4008	-5.21744	-5.4008	-5.19007
-5.4101	-5.21356	-5.4101	-5.19525
-5.4194	-5.21534	-5.4194	-5.20044
-5.4288	-5.24313	-5.4288	-5.2057
-5.4377	-5.19863	-5.4377	-5.21068
-5.447	-5.21755	-5.447	-5.2159
-5.4559	-5.2511	-5.4559	-5.2209
-5.4653	-5.26495	-5.4653	-5.22619
-5.4746	-5.2715	-5.4746	-5.23144
-5.4836	-5.26434	-5.4836	-5.23652
-5.5021	-5.29616	-5.5021	-5.247
-5.5021	-5.27765	-5.5021	-5.247
-5.5201	-5.247	-5.5201	-5.25722
-5.5294	-5.3181	-5.5294	-5.26252
-5.5388	-5.30683	-5.5388	-5.26788
-5.548	-5.32927	-5.548	-5.27314
-5.5567	-5.31773	-5.5567	-5.27812
-5.566	-5.29457	-5.566	-5.28345
-5.5753	-5.33107	-5.5753	-5.28879
-5.5846	-5.31488	-5.5846	-5.29414
-5.5939	-5.32724	-5.5939	-5.2995
-5.6118	-5.33211	-5.6118	-5.30983
-5.6118	-5.35631	-5.6118	-5.30983
-5.6303	-5.3401	-5.6303	-5.32055
-5.6396	-5.37724	-5.6396	-5.32595
-5.6493	-5.36473	-5.6493	-5.3316
-5.6586	-5.36896	-5.6586	-5.33702
-5.6679	-5.40025	-5.6679	-5.34245
-5.6772	-5.38776	-5.6772	-5.34789
-5.6861	-5.3986	-5.6861	-5.3531
-5.6951	-5.4077	-5.6951	-5.35838
-5.7044	-5.38754	-5.7044	-5.36384
-5.7137	-5.41493	-5.7137	-5.36931
-5.723	-5.42283	-5.723	-5.3748
-5.741	-5.42813	-5.741	-5.38543
-5.7503	-5.45799	-5.7503	-5.39094
-5.7596	-5.40697	-5.7596	-5.39646
-5.7686	-5.405	-5.7686	-5.4018
-5.7779	-5.45351	-5.7779	-5.40734
-5.7868	-5.44605	-5.7868	-5.41264
-5.7961	-5.44729	-5.7961	-5.41819
-5.8054	-5.46369	-5.8054	-5.42376
-5.8144	-5.50385	-5.8144	-5.42915
-5.8237	-5.48097	-5.8237	-5.43472
-5.833	-5.5062	-5.833	-5.44031
-5.8523	-5.48013	-5.8523	-5.45193
-5.8608	-5.49254	-5.8608	-5.45707
-5.8702	-5.49217	-5.8702	-5.46275
-5.8794	-5.51539	-5.8794	-5.46832
-5.8887	-5.53476	-5.8887	-5.47396
-5.8977	-5.51281	-5.8977	-5.47943
-5.9067	-5.53516	-5.9067	-5.4849
-5.916	-5.54017	-5.916	-5.49057
-5.9253	-5.54484	-5.9253	-5.49625
-5.9346	-5.56135	-5.9346	-5.50193
-5.9436	-5.55882	-5.9436	-5.50744
-5.9618	-5.55451	-5.9618	-5.51861
-5.9712	-5.56602	-5.9712	-5.52439
-5.9802	-5.56851	-5.9802	-5.52993
-5.9894	-5.55515	-5.9894	-5.53561
-5.9987	-5.59237	-5.9987	-5.54136
-6.0081	-5.59355	-6.0081	-5.54717
-6.0167	-5.61145	-6.0167	-5.5525
-6.026	-5.55866	-6.026	-5.55828
-6.0353	-5.5993	-6.0353	-5.56406
-6.0446	-5.61818	-6.0446	-5.56985
-6.0536	-5.60605	-6.0536	-5.57546
-6.0718	-5.62584	-6.0718	-5.58683
-6.0817	-5.60324	-6.0817	-5.59303
-6.091	-5.61483	-6.091	-5.59887
-6.1003	-5.6318	-6.1003	-5.60471
-6.1093	-5.63844	-6.1093	-5.61038
-6.1186	-5.63335	-6.1186	-5.61624
-6.1279	-5.65704	-6.1279	-5.62211
-6.1369	-5.67952	-6.1369	-5.6278
-6.1458	-5.69653	-6.1458	-5.63343
-6.1551	-5.71796	-6.1551	-5.63933
-6.1644	-5.68513	-6.1644	-5.64523
-6.1737	-5.70944	-6.1737	-5.65115
-6.1827	-5.71003	-6.1827	-5.65688
-6.201	-5.7101	-6.201	-5.66856
-6.2103	-5.68325	-6.2103	-5.67451
-6.2196	-5.72991	-6.2196	-5.68046
-6.2286	-5.73008	-6.2286	-5.68624
-6.2379	-5.75643	-6.2379	-5.69221
-6.2468	-5.74614	-6.2468	-5.69794
-6.2568	-5.7269	-6.2568	-5.70438
-6.2661	-5.73343	-6.2661	-5.71039
-6.2751	-5.75235	-6.2751	-5.7162
-6.2843	-5.77532	-6.2843	-5.72216
-6.2936	-5.78472	-6.2936	-5.72819
-6.3029	-5.77539	-6.3029	-5.73423
-6.3115	-5.81114	-6.3115	-5.73982
-6.3301	-5.8022	-6.3301	-5.75194
-6.3394	-5.7938	-6.3394	-5.75801
-6.3487	-5.79816	-6.3487	-5.76409
-6.3577	-5.8206	-6.3577	-5.76998
-6.3667	-5.83735	-6.3667	-5.77589
-6.3759	-5.85095	-6.3759	-5.78193
-6.3852	-5.8377	-6.3852	-5.78805
-6.3942	-5.86068	-6.3942	-5.79397
-6.4035	-5.8404	-6.4035	-5.80011
-6.4128	-5.86117	-6.4128	-5.80625
-6.4218	-5.8729	-6.4218	-5.8122
-6.4308	-5.87429	-6.4308	-5.81817
-6.4401	-5.85938	-6.4401	-5.82434
-6.4587	-5.86738	-6.4587	-5.8367
-6.468	-5.88466	-6.468	-5.8429
-6.4767	-5.89992	-6.4767	-5.8487
-6.4859	-5.93157	-6.4859	-5.85485
-6.4959	-5.92098	-6.4959	-5.86154
-6.5052	-5.92724	-6.5052	-5.86777
-6.5145	-5.95689	-6.5145	-5.87401
-6.5235	-5.95602	-6.5235	-5.88006
-6.5328	-5.94612	-6.5328	-5.88632
-6.5417	-5.95717	-6.5417	-5.89231
-6.551	-5.98661	-6.551	-5.89859
-6.56	-5.99141	-6.56	-5.90467
-6.5693	-5.97205	-6.5693	-5.91096
-6.5879	-5.96893	-6.5879	-5.92358
-6.5925	-5.96711	-6.5925	-5.9267
-6.6058	-6.002	-6.6058	-5.93575
-6.6151	-6.04411	-6.6151	-5.94209
-6.6244	-6.01251	-6.6244	-5.94843
-6.6337	-5.99615	-6.6337	-5.95479
-6.6427	-6.03426	-6.6427	-5.96095
-6.6516	-6.04415	-6.6516	-5.96704
-6.661	-6.03709	-6.661	-5.97349
-6.6709	-6.03295	-6.6709	-5.9803
-6.6803	-6.08717	-6.6803	-5.98677
-6.6892	-6.0807	-6.6892	-5.9929
-6.7032	-6.08219	-6.7032	-6.00256
-6.7168	-6.04957	-6.7168	-6.01197
-6.7261	-6.117	-6.7261	-6.01841
-6.7351	-6.11158	-6.7351	-6.02466
-6.7444	-6.10933	-6.7444	-6.03112
-6.7536	-6.11317	-6.7536	-6.03752
-6.763	-6.14457	-6.763	-6.04407
-6.7716	-6.10427	-6.7716	-6.05006
-6.7808	-6.1367	-6.7808	-6.05649
-6.7902	-6.12335	-6.7902	-6.06307
-6.7994	-6.14207	-6.7994	-6.06951
-6.8084	-6.19006	-6.8084	-6.07582
-6.8177	-6.16167	-6.8177	-6.08235
-6.836	-6.17056	-6.836	-6.09523
-6.8449	-6.18015	-6.8449	-6.10151
-6.8542	-6.21274	-6.8542	-6.10807
-6.8636	-6.1886	-6.8636	-6.11472
-6.8728	-6.21775	-6.8728	-6.12123
-6.8818	-6.22393	-6.8818	-6.12761
-6.8909	-6.23123	-6.8909	-6.13407
-6.9001	-6.20159	-6.9001	-6.14061
-6.9101	-6.2161	-6.9101	-6.14773
-6.9194	-6.23165	-6.9194	-6.15436
-6.9287	-6.22602	-6.9287	-6.16099
-6.9423	-6.27291	-6.9423	-6.17072
-6.9559	-6.29008	-6.9559	-6.18046
-6.9653	-6.25669	-6.9653	-6.1872
-6.9742	-6.28666	-6.9742	-6.1936
-6.9835	-6.26801	-6.9835	-6.20029
-6.9928	-6.32744	-6.9928	-6.20699
-7.0017	-6.30642	-7.0017	-6.21341
-7.0107	-6.31496	-7.0107	-6.21991
-7.02	-6.28693	-7.02	-6.22663
-7.0293	-6.3046	-7.0293	-6.23337
-7.0386	-6.34409	-7.0386	-6.24011
-7.0519	-6.31368	-7.0519	-6.24977
-7.0658	-6.35297	-7.0658	-6.25988
-7.0751	-6.37372	-7.0751	-6.26666
-7.0851	-6.34022	-7.0851	-6.27396
-7.0944	-6.37619	-7.0944	-6.28075
-7.1034	-6.37001	-7.1034	-6.28734
-7.1126	-6.38549	-7.1126	-6.29408
-7.1217	-6.36499	-7.1217	-6.30076
-7.131	-6.36748	-7.131	-6.30759
-7.14	-6.35198	-7.14	-6.31421
-7.1493	-6.39417	-7.1493	-6.32106
-7.1586	-6.41101	-7.1586	-6.32792
-7.1679	-6.4008	-7.1679	-6.33478
-7.1812	-6.43173	-7.1812	-6.34462
-7.1951	-6.45272	-7.1951	-6.35492
-7.2044	-6.43395	-7.2044	-6.36182
-7.2137	-6.43165	-7.2137	-6.36873
-7.2223	-6.45508	-7.2223	-6.37513
-7.2316	-6.448	-7.2316	-6.38206
-7.2409	-6.45468	-7.2409	-6.38899
-7.2502	-6.46544	-7.2502	-6.39594
-7.2592	-6.46328	-7.2592	-6.40267
-7.2685	-6.47713	-7.2685	-6.40963
-7.2774	-6.50067	-7.2774	-6.41631
-7.2911	-6.46832	-7.2911	-6.42659
-7.2957	-6.48745	-7.2957	-6.43005
-7.3143	-6.52312	-7.3143	-6.44406
-7.3236	-6.50589	-7.3236	-6.45107
-7.3326	-6.52655	-7.3326	-6.45787
-7.3422	-6.5146	-7.3422	-6.46513
-7.3516	-6.51811	-7.3516	-6.47225
-7.3609	-6.51535	-7.3609	-6.4793
-7.3702	-6.57875	-7.3702	-6.48636
-7.3795	-6.53086	-7.3795	-6.49343
-7.3885	-6.55858	-7.3885	-6.50029
-7.3974	-6.60125	-7.3974	-6.50707
-7.4067	-6.58914	-7.4067	-6.51416
-7.425	-6.60814	-7.425	-6.52815
-7.4343	-6.60893	-7.4343	-6.53527
-7.4436	-6.57606	-7.4436	-6.54241
-7.4526	-6.59357	-7.4526	-6.54932
-7.4615	-6.65417	-7.4615	-6.55616
-7.4708	-6.63773	-7.4708	-6.56331
-7.4801	-6.60235	-7.4801	-6.57048
-7.4894	-6.64821	-7.4894	-6.57766
-7.4987	-6.62616	-7.4987	-6.58484
-7.5074	-6.66626	-7.5074	-6.59157
-7.5166	-6.65372	-7.5166	-6.59869
-7.5306	-6.67035	-7.5306	-6.60955
-7.5452	-6.64096	-7.5452	-6.62089
-7.5542	-6.66504	-7.5542	-6.6279
-7.5635	-6.66173	-7.5635	-6.63514
-7.5725	-6.70796	-7.5725	-6.64217
-7.5818	-6.67442	-7.5818	-6.64943
-7.5908	-6.67834	-7.5908	-6.65647
-7.6001	-6.68216	-7.6001	-6.66375
-7.6094	-6.70412	-7.6094	-6.67104
-7.6187	-6.68394	-7.6187	-6.67834
-7.6273	-6.71014	-7.6273	-6.6851
-7.6413	-6.73197	-7.6413	-6.69611
-7.6552	-6.73964	-7.6552	-6.70707
-7.6645	-6.73974	-7.6645	-6.71441
-7.6735	-6.75781	-7.6735	-6.72153
-7.6824	-6.75687	-7.6824	-6.72857
-7.6917	-6.73643	-7.6917	-6.73594
-7.701	-6.75603	-7.701	-6.74332
-7.71	-6.75229	-7.71	-6.75047
-7.7193	-6.77434	-7.7193	-6.75786
-7.7286	-6.78567	-7.7286	-6.76527
-7.7375	-6.7892	-7.7375	-6.77236
-7.7512	-6.80668	-7.7512	-6.7833
-7.7558	-6.76313	-7.7558	-6.78698
-7.7744	-6.76115	-7.7744	-6.80186
-7.7844	-6.83326	-7.7844	-6.80988
-7.7934	-6.8029	-7.7934	-6.81711
-7.8024	-6.85434	-7.8024	-6.82434
-7.8117	-6.8409	-7.8117	-6.83183
-7.821	-6.87834	-7.821	-6.83932
-7.8303	-6.86961	-7.8303	-6.84682
-7.8393	-6.84482	-7.8393	-6.85409
-7.8486	-6.86239	-7.8486	-6.86161
-7.8575	-6.8949	-7.8575	-6.86882
-7.8668	-6.9121	-7.8668	-6.87635
-7.8758	-6.8739	-7.8758	-6.88365
-7.8851	-6.91473	-7.8851	-6.89121
-7.9037	-6.89007	-7.9037	-6.90635
-7.9037	-6.8666	-7.9037	-6.90635
-7.9216	-6.92376	-7.9216	-6.92095
-7.9309	-6.92114	-7.9309	-6.92854
-7.9402	-6.90196	-7.9402	-6.93615
-7.9491	-6.93014	-7.9491	-6.94344
-7.9591	-6.96412	-7.9591	-6.95164
-7.9684	-6.89586	-7.9684	-6.95927
-7.9774	-6.95555	-7.9774	-6.96667
-7.9867	-6.96066	-7.9867	-6.97432
-7.996	-7.00298	-7.996	-6.98198
-8.0049	-6.99281	-8.0049	-6.98932
-8.0142	-7.01098	-8.0142	-6.997
-8.0325	-7.0195	-8.0325	-7.01214
-8.0325	-6.99747	-8.0325	-7.01214
-8.0509	-6.98652	-8.0509	-7.02739
-8.0601	-7.01911	-8.0601	-7.03503
-8.0695	-7.00586	-8.0695	-7.04284
-8.0781	-7.04787	-8.0781	-7.05
-8.0874	-7.02487	-8.0874	-7.05775
-8.0967	-7.02232	-8.0967	-7.0655
-8.106	-7.00715	-8.106	-7.07327
-8.115	-6.98637	-8.115	-7.0808
-8.1243	-7.0742	-8.1243	-7.08858
-8.1333	-7.05037	-8.1333	-7.09612
-8.1426	-7.0874	-8.1426	-7.10392
-8.1608	-7.07706	-8.1608	-7.11921
-8.1654	-7.08477	-8.1654	-7.12309
-8.1794	-7.10782	-8.1794	-7.13488
-8.1884	-7.10848	-8.1884	-7.14247
-8.1987	-7.11615	-8.1987	-7.15117
-8.2073	-7.10594	-8.2073	-7.15844
-8.2166	-7.11357	-8.2166	-7.16632
-8.2259	-7.1565	-8.2259	-7.1742
-8.2352	-7.12557	-8.2352	-7.18209
-8.2442	-7.13672	-8.2442	-7.18973
-8.2531	-7.17888	-8.2531	-7.1973
-8.2625	-7.13716	-8.2625	-7.2053
-8.2718	-7.19668	-8.2718	-7.21322
-8.2901	-7.17416	-8.2901	-7.22885
-8.2994	-7.15104	-8.2994	-7.2368
-8.3083	-7.20021	-8.3083	-7.24442
-8.3173	-7.18929	-8.3173	-7.25213
-8.3266	-7.19167	-8.3266	-7.26011
-8.3359	-7.23395	-8.3359	-7.26809
-8.3452	-7.22256	-8.3452	-7.27609
-8.3542	-7.22631	-8.3542	-7.28383
-8.3632	-7.27763	-8.3632	-7.29159
-8.3731	-7.2148	-8.3731	-7.30013
-8.3824	-7.26658	-8.3824	-7.30816
-8.3917	-7.25582	-8.3917	-7.3162
-8.4053	-7.26372	-8.4053	-7.32797
-8.4192	-7.28937	-8.4192	-7.34003
-8.4283	-7.26216	-8.4283	-7.34793
-8.4376	-7.325	-8.4376	-7.35601
-8.4465	-7.30168	-8.4465	-7.36376
-8.4558	-7.30191	-8.4558	-7.37186
-8.4651	-7.35828	-8.4651	-7.37997
-8.4744	-7.33772	-8.4744	-7.38809
-8.4831	-7.31755	-8.4831	-7.39569
-8.4924	-7.32884	-8.4924	-7.40383
-8.511	-7.36892	-8.511	-7.42013
-8.5153	-7.39407	-8.5153	-7.4239
-8.5293	-7.38894	-8.5293	-7.4362
-8.5383	-7.40779	-8.5383	-7.44412
-8.5476	-7.41071	-8.5476	-7.45231
-8.5565	-7.39599	-8.5565	-7.46015
-8.5659	-7.41241	-8.5659	-7.46845
-8.5751	-7.40938	-8.5751	-7.47658
-8.5845	-7.42682	-8.5845	-7.48489
-8.5931	-7.44108	-8.5931	-7.4925
-8.6024	-7.47087	-8.6024	-7.50075
-8.6216	-7.46618	-8.6216	-7.51779
-8.6309	-7.42532	-8.6309	-7.52606
-8.6402	-7.47301	-8.6402	-7.53434
-8.6492	-7.49625	-8.6492	-7.54236
-8.6582	-7.50407	-8.6582	-7.55039
-8.6675	-7.4913	-8.6675	-7.55869
-8.6768	-7.51347	-8.6768	-7.567
-8.6858	-7.49995	-8.6858	-7.57506
-8.6951	-7.51945	-8.6951	-7.58339
-8.7044	-7.51127	-8.7044	-7.59173
-8.7133	-7.54422	-8.7133	-7.59972
-8.7224	-7.53983	-8.7224	-7.6079
-8.7317	-7.55472	-8.7317	-7.61626
-8.7503	-7.54341	-8.7503	-7.63302
-8.7592	-7.62285	-8.7592	-7.64105
-8.7682	-7.58301	-8.7682	-7.64918
-8.7775	-7.61941	-8.7775	-7.65759
-8.7875	-7.56172	-8.7875	-7.66665
-8.7968	-7.59572	-8.7968	-7.67508
-8.8058	-7.59037	-8.8058	-7.68324
-8.8151	-7.64055	-8.8151	-7.69169
-8.8244	-7.62392	-8.8244	-7.70014
-8.8333	-7.65079	-8.8333	-7.70824
-8.8422	-7.64698	-8.8422	-7.71635
-8.8609	-7.64931	-8.8609	-7.73341
-8.8702	-7.66739	-8.8702	-7.74191
-8.8795	-7.7083	-8.8795	-7.75042
-8.8881	-7.65475	-8.8881	-7.75829
-8.8974	-7.68681	-8.8974	-7.76682
-8.9067	-7.69638	-8.9067	-7.77535
-8.916	-7.69399	-8.916	-7.7839
-8.925	-7.68268	-8.925	-7.79217
-8.9343	-7.74076	-8.9343	-7.80073
-8.9433	-7.73713	-8.9433	-7.80902
-8.9526	-7.69435	-8.9526	-7.8176
-8.9709	-7.71213	-8.9709	-7.83451
-8.9709	-7.74668	-8.9709	-7.83451
-8.9875	-7.76086	-8.9875	-7.84987
-8.9919	-7.78022	-8.9919	-7.85395
-8.9949	-7.75164	-8.9949	-7.85673
-8.9968	-7.77321	-8.9968	-7.85849
-8.998	-7.7466	-8.998	-7.8596
-8.9987	-7.74313	-8.9987	-7.86025
-8.9992	-7.79014	-8.9992	-7.86072
-8.9995	-7.78432	-8.9995	-7.861
-8.9996	-7.80027	-8.9996	-7.86109
-8.9998	-7.82385	-8.9998	-7.86127
-8.9998	-7.82427	-8.9998	-7.86127
-9	-7.80832	-9	-7.86146
-9	-7.79546	-9	-7.86146
-9	-7.8313	-9	-7.86146
-9	-7.82409	-9	-7.86146
-9	-7.86453	-9	-7.86146
-9	-7.79784	-9	-7.86146
-9	-7.82618	-9	-7.86146

## Sheet: Fig1f
B (T)	Rdrag (Ω)	B fit (T)	Rdrag- B2 fit (Ω)
8.9999	5.74309	8.9999	5.56743
8.9919	5.6908	8.9919	5.56081
8.9827	5.66601	8.9827	5.55322
8.9734	5.65094	8.9734	5.54555
8.9651	5.66298	8.9651	5.53871
8.9559	5.63886	8.9559	5.53113
8.9465	5.62904	8.9465	5.5234
8.9372	5.61486	8.9372	5.51576
8.9286	5.58807	8.9286	5.5087
8.9103	5.55382	8.9103	5.4937
8.9014	5.55204	8.9014	5.48642
8.8924	5.55502	8.8924	5.47907
8.8835	5.46237	8.8835	5.4718
8.8742	5.54133	8.8742	5.46421
8.8655	5.53141	8.8655	5.45712
8.8563	5.5928	8.8563	5.44963
8.847	5.53724	8.847	5.44207
8.8384	5.51694	8.8384	5.43508
8.8294	5.50711	8.8294	5.42777
8.8201	5.52926	8.8201	5.42023
8.8022	5.48403	8.8022	5.40574
8.7936	5.48736	8.7936	5.39879
8.7843	5.46883	8.7843	5.39128
8.775	5.45217	8.775	5.38378
8.7664	5.47899	8.7664	5.37685
8.7575	5.49369	8.7575	5.36968
8.7482	5.46508	8.7482	5.3622
8.7395	5.46222	8.7395	5.35521
8.7209	5.37767	8.7209	5.3403
8.7122	5.40882	8.7122	5.33333
8.7033	5.35635	8.7033	5.32621
8.6943	5.34415	8.6943	5.31901
8.6851	5.39384	8.6851	5.31167
8.6761	5.35693	8.6761	5.30449
8.6671	5.33688	8.6671	5.29732
8.6582	5.33281	8.6582	5.29024
8.6489	5.32635	8.6489	5.28284
8.6359	5.26261	8.6359	5.27252
8.622	5.29453	8.622	5.2615
8.6127	5.23417	8.6127	5.25413
8.6041	5.30126	8.6041	5.24733
8.5948	5.21948	8.5948	5.23998
8.5859	5.24576	8.5859	5.23296
8.5773	5.24836	8.5773	5.22618
8.568	5.23837	8.568	5.21885
8.5587	5.21764	8.5587	5.21154
8.55	5.25879	8.55	5.2047
8.5318	5.15984	8.5318	5.19042
8.5318	5.13368	8.5318	5.19042
8.5136	5.18446	8.5136	5.17616
8.5049	5.16698	8.5049	5.16936
8.4957	5.17	8.4957	5.16218
8.4866	5.16976	8.4866	5.15508
8.4777	5.20304	8.4777	5.14814
8.4684	5.16401	8.4684	5.1409
8.4598	5.14627	8.4598	5.13421
8.4505	5.08779	8.4505	5.12699
8.4322	5.13372	8.4322	5.1128
8.423	5.14415	8.423	5.10567
8.4146	5.15896	8.4146	5.09917
8.4053	5.0923	8.4053	5.09199
8.396	5.07306	8.396	5.08481
8.3871	5.10786	8.3871	5.07795
8.3782	5.06304	8.3782	5.07109
8.3693	5.09916	8.3693	5.06425
8.36	5.07945	8.36	5.0571
8.351	5.06753	8.351	5.05019
8.3421	5.02166	8.3421	5.04336
8.3241	5.02799	8.3241	5.02958
8.3148	5.0773	8.3148	5.02247
8.3059	4.98868	8.3059	5.01568
8.2969	5.01339	8.2969	5.00881
8.2879	5.03316	8.2879	5.00196
8.2793	4.99187	8.2793	4.99541
8.27	4.98333	8.27	4.98834
8.2607	4.94674	8.2607	4.98128
8.252	4.98765	8.252	4.97468
8.2431	5.02123	8.2431	4.96793
8.2248	4.91536	8.2248	4.95409
8.2156	4.99122	8.2156	4.94714
8.2069	4.88059	8.2069	4.94058
8.198	4.93322	8.198	4.93387
8.1887	4.86975	8.1887	4.92687
8.1801	4.85644	8.1801	4.9204
8.1711	4.84019	8.1711	4.91364
8.1618	4.88631	8.1618	4.90666
8.1532	4.88463	8.1532	4.90022
8.1346	4.86015	8.1346	4.8863
8.126	4.83244	8.126	4.87987
8.1171	4.84488	8.1171	4.87323
8.1078	4.83448	8.1078	4.8663
8.0988	4.79362	8.0988	4.8596
8.0898	4.88981	8.0898	4.85291
8.0812	4.84572	8.0812	4.84652
8.0719	4.82504	8.0719	4.83962
8.0626	4.7948	8.0626	4.83272
8.0537	4.76165	8.0537	4.82613
8.0357	4.78751	8.0357	4.81283
8.0267	4.7753	8.0267	4.80619
8.0177	4.75017	8.0177	4.79955
8.0085	4.75161	8.0085	4.79278
7.9998	4.75076	7.9998	4.78638
7.9909	4.83322	7.9909	4.77984
7.9816	4.71712	7.9816	4.77302
7.9726	4.72357	7.9726	4.76642
7.9547	4.75154	7.9547	4.75333
7.9458	4.78421	7.9458	4.74683
7.9365	4.73404	7.9365	4.74004
7.9282	4.75899	7.9282	4.73399
7.9189	4.75057	7.9189	4.72722
7.9096	4.70467	7.9096	4.72046
7.9004	4.67161	7.9004	4.71378
7.8917	4.67218	7.8917	4.70746
7.8825	4.72058	7.8825	4.7008
7.8649	4.6936	7.8649	4.68806
7.8556	4.64386	7.8556	4.68135
7.8466	4.68064	7.8466	4.67486
7.8377	4.65014	7.8377	4.66844
7.8287	4.64385	7.8287	4.66197
7.8197	4.66137	7.8197	4.6555
7.8105	4.66517	7.8105	4.64889
7.8011	4.66278	7.8011	4.64215
7.7928	4.64861	7.7928	4.6362
7.7835	4.65748	7.7835	4.62955
7.7656	4.58447	7.7656	4.61676
7.7566	4.63319	7.7566	4.61034
7.7476	4.6364	7.7476	4.60393
7.7387	4.62798	7.7387	4.5976
7.7294	4.60744	7.7294	4.59099
7.7208	4.58128	7.7208	4.58489
7.7115	4.58743	7.7115	4.57829
7.7025	4.54444	7.7025	4.57192
7.6843	4.52964	7.6843	4.55906
7.676	4.56325	7.676	4.5532
7.6667	4.5375	7.6667	4.54664
7.6575	4.59319	7.6575	4.54017
7.6482	4.48333	7.6482	4.53363
7.6395	4.51953	7.6395	4.52752
7.6303	4.47478	7.6303	4.52106
7.6216	4.47547	7.6216	4.51497
7.6126	4.49853	7.6126	4.50867
7.6034	4.50324	7.6034	4.50224
7.5941	4.51145	7.5941	4.49575
7.5765	4.51441	7.5765	4.48348
7.5671	4.43372	7.5671	4.47694
7.5581	4.48526	7.5581	4.47069
7.5492	4.43203	7.5492	4.46451
7.5402	4.47572	7.5402	4.45827
7.531	4.46705	7.531	4.4519
7.522	4.45298	7.522	4.44568
7.513	4.43914	7.513	4.43946
7.5038	4.44483	7.5038	4.43311
7.4901	4.43267	7.4901	4.42368
7.4858	4.42668	7.4858	4.42072
7.4676	4.46651	7.4676	4.40822
7.459	4.39097	7.459	4.40232
7.45	4.35214	7.45	4.39615
7.4408	4.42614	7.4408	4.38986
7.4315	4.41193	7.4315	4.38351
7.4225	4.38661	7.4225	4.37737
7.4139	4.38127	7.4139	4.3715
7.4046	4.36553	7.4046	4.36517
7.3956	4.31454	7.3956	4.35905
7.3867	4.37818	7.3867	4.35301
7.3687	4.36268	7.3687	4.34081
7.3594	4.32173	7.3594	4.33452
7.3505	4.3442	7.3505	4.3285
7.3415	4.2645	7.3415	4.32243
7.3322	4.32005	7.3322	4.31616
7.3239	4.30352	7.3239	4.31057
7.3146	4.29569	7.3146	4.30431
7.3053	4.3078	7.3053	4.29807
7.2877	4.25043	7.2877	4.28627
7.2784	4.3222	7.2784	4.28005
7.2694	4.28184	7.2694	4.27403
7.2601	4.30015	7.2601	4.26782
7.2515	4.23463	7.2515	4.26209
7.2425	4.26859	7.2425	4.2561
7.2332	4.29706	7.2332	4.24991
7.2247	4.2349	7.2247	4.24427
7.2157	4.23676	7.2157	4.2383
7.2064	4.23907	7.2064	4.23214
7.1971	4.22128	7.1971	4.22598
7.1792	4.20551	7.1792	4.21416
7.1705	4.20015	7.1705	4.20842
7.1616	4.23336	7.1616	4.20256
7.1523	4.20024	7.1523	4.19645
7.1434	4.15653	7.1434	4.1906
7.1344	4.24262	7.1344	4.1847
7.1251	4.2052	7.1251	4.17861
7.1165	4.15258	7.1165	4.17298
7.1071	4.14017	7.1071	4.16684
7.0892	4.16691	7.0892	4.15517
7.0803	4.12414	7.0803	4.14937
7.0716	4.1719	7.0716	4.14372
7.0623	4.1864	7.0623	4.13768
7.0531	4.17529	7.0531	4.13171
7.0441	4.18349	7.0441	4.12588
7.0355	4.12349	7.0355	4.12032
7.0261	4.13108	7.0261	4.11425
7.0172	4.12063	7.0172	4.10851
7.0085	4.09936	7.0085	4.1029
6.99	4.08197	6.99	4.091
6.9811	4.09949	6.9811	4.08529
6.9721	4.11318	6.9721	4.07952
6.9628	4.0984	6.9628	4.07357
6.9542	4.06908	6.9542	4.06807
6.9449	4.07051	6.9449	4.06213
6.936	4.08027	6.936	4.05646
6.927	4.06274	6.927	4.05072
6.9177	4.05461	6.9177	4.04481
6.9001	4.04268	6.9001	4.03364
6.8908	4.06413	6.8908	4.02774
6.8814	4.02016	6.8814	4.0218
6.8731	4.02598	6.8731	4.01655
6.8639	3.98892	6.8639	4.01075
6.8549	4.03191	6.8549	4.00507
6.8459	3.99103	6.8459	3.99941
6.8369	3.96853	6.8369	3.99375
6.819	4.01149	6.819	3.98252
6.819	3.97924	6.819	3.98252
6.8005	4.00632	6.8005	3.97095
6.7912	3.93796	6.7912	3.96514
6.7829	3.98916	6.7829	3.95997
6.7736	4.00044	6.7736	3.95417
6.7643	3.95667	6.7643	3.94839
6.7551	3.91529	6.7551	3.94268
6.7468	3.94256	6.7468	3.93753
6.7375	3.93316	6.7375	3.93177
6.7196	3.91749	6.7196	3.9207
6.7106	3.90104	6.7106	3.91515
6.7013	3.92498	6.7013	3.90942
6.6926	3.92489	6.6926	3.90406
6.6833	3.85924	6.6833	3.89835
6.6741	3.84085	6.6741	3.8927
6.6654	3.85479	6.6654	3.88737
6.6561	3.84934	6.6561	3.88168
6.6471	3.87395	6.6471	3.87618
6.6378	3.88098	6.6378	3.8705
6.6202	3.8401	6.6202	3.85978
6.6113	3.85509	6.6113	3.85437
6.602	3.84428	6.602	3.84873
6.5927	3.82289	6.5927	3.84309
6.5837	3.78077	6.5837	3.83764
6.5748	3.79761	6.5748	3.83226
6.5655	3.76415	6.5655	3.82665
6.5568	3.7958	6.5568	3.82141
6.5476	3.78257	6.5476	3.81587
6.5343	3.77834	6.5343	3.80787
6.5297	3.76954	6.5297	3.80511
6.5114	3.74323	6.5114	3.79415
6.5025	3.74663	6.5025	3.78883
6.4935	3.74587	6.4935	3.78346
6.4846	3.74233	6.4846	3.77815
6.4756	3.76539	6.4756	3.77279
6.4663	3.74785	6.4663	3.76726
6.4573	3.74127	6.4573	3.76192
6.4487	3.74907	6.4487	3.75682
6.4394	3.6816	6.4394	3.75131
6.4304	3.67217	6.4304	3.74599
6.4125	3.70212	6.4125	3.73543
6.4032	3.6972	6.4032	3.72995
6.3945	3.68211	6.3945	3.72484
6.3853	3.6622	6.3853	3.71944
6.3763	3.6963	6.3763	3.71416
6.3676	3.63225	6.3676	3.70907
6.3584	3.68368	6.3584	3.70369
6.3491	3.66588	6.3491	3.69826
6.3311	3.63718	6.3311	3.68778
6.3225	3.6633	6.3225	3.68278
6.3132	3.66355	6.3132	3.67738
6.3043	3.65957	6.3043	3.67222
6.2954	3.60622	6.2954	3.66707
6.2861	3.62705	6.2861	3.66169
6.2771	3.6009	6.2771	3.6565
6.2684	3.57034	6.2684	3.65148
6.2592	3.57396	6.2592	3.64619
6.2416	3.55053	6.2416	3.63608
6.2323	3.58544	6.2323	3.63075
6.2233	3.54142	6.2233	3.6256
6.214	3.56067	6.214	3.62029
6.2054	3.5671	6.2054	3.61538
6.1961	3.55559	6.1961	3.61008
6.1871	3.56507	6.1871	3.60496
6.1781	3.54442	6.1781	3.59985
6.1692	3.5559	6.1692	3.5948
6.1602	3.51212	6.1602	3.5897
6.1509	3.52474	6.1509	3.58444
6.133	3.52829	6.133	3.57434
6.1237	3.5161	6.1237	3.56911
6.1154	3.52145	6.1154	3.56444
6.1061	3.50539	6.1061	3.55922
6.0968	3.48256	6.0968	3.554
6.0882	3.49434	6.0882	3.54919
6.0789	3.49417	6.0789	3.54399
6.0703	3.46056	6.0703	3.53919
6.061	3.48825	6.061	3.53401
6.0521	3.46892	6.0521	3.52906
6.0341	3.46488	6.0341	3.51906
6.0252	3.45235	6.0252	3.51413
6.0162	3.44047	6.0162	3.50915
6.007	3.41253	6.007	3.50407
5.998	3.4804	5.998	3.49911
5.9893	3.41764	5.9893	3.49432
5.9801	3.40452	5.9801	3.48926
5.9711	3.38764	5.9711	3.48432
5.9531	3.44006	5.9531	3.47446
5.9438	3.42505	5.9438	3.46937
5.9352	3.41549	5.9352	3.46468
5.9258	3.4071	5.9258	3.45956
5.9172	3.37095	5.9172	3.45488
5.9079	3.42128	5.9079	3.44983
5.8987	3.41339	5.8987	3.44484
5.89	3.44638	5.89	3.44013
5.8807	3.39807	5.8807	3.4351
5.8631	3.37525	5.8631	3.4256
5.8631	3.39968	5.8631	3.4256
5.8446	3.34926	5.8446	3.41565
5.836	3.38381	5.836	3.41104
5.827	3.36725	5.827	3.40621
5.8181	3.32713	5.8181	3.40145
5.8088	3.36192	5.8088	3.39648
5.7998	3.32049	5.7998	3.39169
5.7908	3.37576	5.7908	3.38689
5.7819	3.32494	5.7819	3.38216
5.773	3.29113	5.773	3.37744
5.755	3.26884	5.755	3.3679
5.7457	3.34697	5.7457	3.36299
5.7367	3.32691	5.7367	3.35824
5.7277	3.3243	5.7277	3.3535
5.7184	3.29056	5.7184	3.34861
5.7095	3.298	5.7095	3.34394
5.7009	3.31979	5.7009	3.33943
5.6915	3.3018	5.6915	3.33451
5.6823	3.28709	5.6823	3.32971
5.6736	3.29804	5.6736	3.32517
5.6554	3.24286	5.6554	3.31569
5.6468	3.26221	5.6468	3.31123
5.6371	3.25251	5.6371	3.3062
5.6282	3.23843	5.6282	3.30159
5.6192	3.24667	5.6192	3.29694
5.6103	3.25582	5.6103	3.29235
5.6013	3.25761	5.6013	3.28772
5.592	3.23903	5.592	3.28294
5.5744	3.22297	5.5744	3.27391
5.5744	3.18708	5.5744	3.27391
5.5559	3.18117	5.5559	3.26445
5.5466	3.23325	5.5466	3.2597
5.538	3.20526	5.538	3.25532
5.529	3.18733	5.529	3.25075
5.52	3.19538	5.52	3.24618
5.5111	3.20223	5.5111	3.24167
5.5017	3.21617	5.5017	3.23691
5.4927	3.21173	5.4927	3.23237
5.4841	3.20331	5.4841	3.22803
5.4658	3.16377	5.4658	3.21883
5.4569	3.15247	5.4569	3.21436
5.4479	3.13172	5.4479	3.20985
5.439	3.16813	5.439	3.2054
5.4297	3.17014	5.4297	3.20076
5.4207	3.13256	5.4207	3.19627
5.4121	3.16786	5.4121	3.19199
5.4028	3.14006	5.4028	3.18737
5.3849	3.15257	5.3849	3.1785
5.3756	3.16504	5.3756	3.1739
5.367	3.11155	5.367	3.16966
5.3581	3.10538	5.3581	3.16527
5.3488	3.11584	5.3488	3.1607
5.3395	3.1122	5.3395	3.15613
5.3309	3.0639	5.3309	3.15192
5.3219	3.06587	5.3219	3.14751
5.3129	3.10278	5.3129	3.14311
5.3036	3.14184	5.3036	3.13858
5.286	3.09914	5.286	3.13002
5.2767	3.08435	5.2767	3.1255
5.2677	3.06704	5.2677	3.12114
5.2587	3.06316	5.2587	3.11679
5.2498	3.05848	5.2498	3.11249
5.2405	3.05392	5.2405	3.10801
5.2319	3.02911	5.2319	3.10388
5.2226	3.02365	5.2226	3.09941
5.2136	3.03256	5.2136	3.09509
5.205	3.01573	5.205	3.09098
5.1957	3.03512	5.1957	3.08653
5.1778	3.03124	5.1778	3.078
5.1685	3.03845	5.1685	3.07358
5.1599	3.01416	5.1599	3.0695
5.1506	3.00464	5.1506	3.0651
5.1413	3.01962	5.1413	3.0607
5.1327	3.01143	5.1327	3.05664
5.1234	3.03101	5.1234	3.05226
5.1148	2.99434	5.1148	3.04821
5.0966	3.01784	5.0966	3.03968
5.0873	2.98259	5.0873	3.03533
5.079	2.96087	5.079	3.03145
5.0697	2.93135	5.0697	3.02711
5.0607	2.97943	5.0607	3.02292
5.0514	2.9265	5.0514	3.0186
5.0427	2.95681	5.0427	3.01457
5.0338	2.95234	5.0338	3.01045
5.0245	2.97557	5.0245	3.00615
5.0068	2.9329	5.0068	2.998
4.9975	2.92175	4.9975	2.99372
4.9882	2.93111	4.9882	2.98946
4.9796	2.90786	4.9796	2.98552
4.9703	2.92004	4.9703	2.98127
4.9617	2.89959	4.9617	2.97734
4.9527	2.97922	4.9527	2.97324
4.9435	2.90731	4.9435	2.96906
4.9256	2.91921	4.9256	2.96094
4.9256	2.91252	4.9256	2.96094
4.9077	2.90598	4.9077	2.95286
4.8984	2.88131	4.8984	2.94867
4.8894	2.88961	4.8894	2.94462
4.8801	2.89886	4.8801	2.94045
4.8715	2.91358	4.8715	2.9366
4.8625	2.89946	4.8625	2.93257
4.8532	2.87895	4.8532	2.92842
4.8443	2.87355	4.8443	2.92446
4.8264	2.87859	4.8264	2.9165
4.8173	2.89314	4.8173	2.91247
4.8077	2.8445	4.8077	2.90823
4.7988	2.86857	4.7988	2.9043
4.7898	2.86837	4.7898	2.90033
4.7808	2.86391	4.7808	2.89638
4.7719	2.8626	4.7719	2.89247
4.7626	2.85471	4.7626	2.8884
4.745	2.83025	4.745	2.88071
4.7357	2.87968	4.7357	2.87666
4.7267	2.83403	4.7267	2.87275
4.7178	2.83843	4.7178	2.86889
4.7088	2.84565	4.7088	2.86499
4.6996	2.82405	4.6996	2.86101
4.6906	2.81419	4.6906	2.85713
4.6816	2.81331	4.6816	2.85325
4.6723	2.83038	4.6723	2.84926
4.664	2.81331	4.664	2.8457
4.6455	2.81929	4.6455	2.83779
4.6362	2.8316	4.6362	2.83382
4.6272	2.80292	4.6272	2.82999
4.618	2.79235	4.618	2.82608
4.6093	2.83111	4.6093	2.82239
4.6004	2.78501	4.6004	2.81863
4.5911	2.79353	4.5911	2.8147
4.5817	2.77858	4.5817	2.81074
4.5731	2.78527	4.5731	2.80712
4.5641	2.77328	4.5641	2.80335
4.5548	2.77723	4.5548	2.79945
4.5369	2.77398	4.5369	2.79197
4.5276	2.76852	4.5276	2.7881
4.519	2.79421	4.519	2.78453
4.5096	2.78235	4.5096	2.78063
4.5007	2.761	4.5007	2.77694
4.4914	2.77791	4.4914	2.7731
4.4828	2.74448	4.4828	2.76956
4.4738	2.72554	4.4738	2.76585
4.4557	2.73709	4.4557	2.75843
4.4557	2.73691	4.4557	2.75843
4.4381	2.75813	4.4381	2.75124
4.4288	2.73597	4.4288	2.74745
4.4195	2.72867	4.4195	2.74367
4.4108	2.71112	4.4108	2.74014
4.4019	2.70401	4.4019	2.73654
4.3926	2.72161	4.3926	2.73278
4.3836	2.72425	4.3836	2.72915
4.3747	2.70068	4.3747	2.72557
4.366	2.70536	4.366	2.72208
4.3474	2.69105	4.3474	2.71463
4.3474	2.69159	4.3474	2.71463
4.3295	2.69519	4.3295	2.7075
4.3201	2.6691	4.3201	2.70376
4.3118	2.68877	4.3118	2.70047
4.3026	2.68459	4.3026	2.69683
4.2933	2.71012	4.2933	2.69316
4.2847	2.68007	4.2847	2.68977
4.2757	2.68124	4.2757	2.68623
4.2668	2.67802	4.2668	2.68273
4.2574	2.666	4.2574	2.67905
4.2396	2.6634	4.2396	2.67211
4.2306	2.64629	4.2306	2.6686
4.2217	2.68518	4.2217	2.66515
4.2127	2.67142	4.2127	2.66166
4.2038	2.65212	4.2038	2.65822
4.1945	2.64791	4.1945	2.65463
4.1858	2.65492	4.1858	2.65128
4.1765	2.67151	4.1765	2.64771
4.1589	2.62256	4.1589	2.64097
4.1497	2.64292	4.1497	2.63746
4.1404	2.64729	4.1404	2.63392
4.1317	2.65376	4.1317	2.63061
4.1317	2.64763	4.1317	2.63061
4.1094	2.64083	4.1094	2.62217
4.1005	2.61861	4.1005	2.61881
4.0912	2.60472	4.0912	2.61531
4.0819	2.58795	4.0819	2.61182
4.0729	2.61113	4.0729	2.60845
4.064	2.60912	4.064	2.60512
4.055	2.60119	4.055	2.60176
4.046	2.5793	4.046	2.59841
4.0371	2.59784	4.0371	2.59511
4.0278	2.594	4.0278	2.59166
4.0103	2.5391	4.0103	2.5852
4.001	2.5603	4.001	2.58178
3.9917	2.57181	3.9917	2.57836
3.983	2.60404	3.983	2.57518
3.9741	2.57673	3.9741	2.57192
3.9648	2.60361	3.9648	2.56853
3.9555	2.56419	3.9555	2.56515
3.9469	2.59896	3.9469	2.56202
3.929	2.55701	3.929	2.55555
3.929	2.54587	3.929	2.55555
3.9107	2.57754	3.9107	2.54896
3.9014	2.5475	3.9014	2.54562
3.8921	2.57808	3.8921	2.54229
3.8834	2.55264	3.8834	2.53918
3.8745	2.5389	3.8745	2.53601
3.8652	2.5381	3.8652	2.5327
3.8566	2.58886	3.8566	2.52965
3.8476	2.57546	3.8476	2.52647
3.8383	2.52773	3.8383	2.52318
3.829	2.55786	3.829	2.51991
3.8107	2.53419	3.8107	2.51348
3.8018	2.54494	3.8018	2.51037
3.7928	2.57554	3.7928	2.50723
3.7843	2.57399	3.7843	2.50427
3.775	2.49215	3.775	2.50104
3.7657	2.51083	3.7657	2.49782
3.7567	2.53395	3.7567	2.49471
3.7481	2.56128	3.7481	2.49175
3.7388	2.5215	3.7388	2.48855
3.7209	2.52133	3.7209	2.48241
3.7119	2.54262	3.7119	2.47934
3.7026	2.5276	3.7026	2.47617
3.694	2.52863	3.694	2.47325
3.6844	2.49989	3.6844	2.47
3.6755	2.50382	3.6755	2.46699
3.6664	2.49634	3.6664	2.46392
3.6578	2.52598	3.6578	2.46102
3.6485	2.54087	3.6485	2.4579
3.6391	2.50709	3.6391	2.45476
3.6215	2.50061	3.6215	2.44889
3.6123	2.4921	3.6123	2.44583
3.6033	2.54165	3.6033	2.44284
3.5943	2.49604	3.5943	2.43987
3.5854	2.48364	3.5854	2.43693
3.5764	2.50055	3.5764	2.43397
3.5675	2.49373	3.5675	2.43105
3.5585	2.51664	3.5585	2.4281
3.5496	2.53032	3.5496	2.4252
3.5364	2.50664	3.5364	2.4209
3.5224	2.48813	3.5224	2.41636
3.5131	2.46071	3.5131	2.41336
3.5045	2.48443	3.5045	2.41058
3.4955	2.49628	3.4955	2.40769
3.4862	2.50553	3.4862	2.40471
3.4772	2.47057	3.4772	2.40183
3.4683	2.47862	3.4683	2.39899
3.455	2.47526	3.455	2.39476
3.4411	2.4707	3.4411	2.39035
3.4321	2.4517	3.4321	2.38751
3.4231	2.50446	3.4231	2.38468
3.4141	2.42547	3.4141	2.38185
3.4055	2.43546	3.4055	2.37916
3.3963	2.47493	3.3963	2.37628
3.387	2.48213	3.387	2.37338
3.378	2.44554	3.378	2.37059
3.3694	2.45151	3.3694	2.36792
3.3508	2.42495	3.3508	2.36218
3.3508	2.42382	3.3508	2.36218
3.3332	2.45574	3.3332	2.35677
3.324	2.45333	3.324	2.35396
3.3153	2.44013	3.3153	2.35131
3.3061	2.44996	3.3061	2.34851
3.2967	2.45269	3.2967	2.34566
3.2877	2.43791	3.2877	2.34293
3.2788	2.42077	3.2788	2.34025
3.2699	2.43834	3.2699	2.33757
3.252	2.42981	3.252	2.33221
3.243	2.46036	3.243	2.32952
3.2337	2.45188	3.2337	2.32676
3.2248	2.41392	3.2248	2.32412
3.2155	2.39317	3.2155	2.32136
3.2068	2.38937	3.2068	2.3188
3.1975	2.41299	3.1975	2.31606
3.1882	2.43525	3.1882	2.31333
3.1795	2.42207	3.1795	2.31079
3.1702	2.42488	3.1702	2.30807
3.1613	2.41541	3.1613	2.30549
3.1434	2.3862	3.1434	2.3003
3.1341	2.39848	3.1341	2.29762
3.1248	2.42684	3.1248	2.29495
3.1165	2.40738	3.1165	2.29257
3.1072	2.41024	3.1072	2.28991
3.0982	2.37437	3.0982	2.28734
3.089	2.35806	3.089	2.28473
3.0804	2.3855	3.0804	2.28229
3.0711	2.40285	3.0711	2.27966
3.0618	2.40015	3.0618	2.27704
3.0525	2.40003	3.0525	2.27443
3.0392	2.37477	3.0392	2.27071
3.0257	2.40859	3.0257	2.26694
3.0167	2.4006	3.0167	2.26445
3.0077	2.38888	3.0077	2.26196
2.9984	2.38905	2.9984	2.25939
2.9895	2.40915	2.9895	2.25694
2.9808	2.38963	2.9808	2.25455
2.9715	2.38695	2.9715	2.25201
2.9578	2.37679	2.9578	2.24828
2.9535	2.38085	2.9535	2.24711
2.9356	2.39128	2.9356	2.24227
2.9263	2.36945	2.9263	2.23976
2.9174	2.36805	2.9174	2.23738
2.9087	2.3568	2.9087	2.23505
2.8994	2.38136	2.8994	2.23257
2.8902	2.40287	2.8902	2.23012
2.8815	2.38867	2.8815	2.22781
2.8723	2.36855	2.8723	2.22538
2.8547	2.34617	2.8547	2.22075
2.8501	2.36457	2.8501	2.21954
2.8361	2.36719	2.8361	2.21589
2.8275	2.37797	2.8275	2.21365
2.8185	2.36058	2.8185	2.21131
2.8096	2.3678	2.8096	2.20901
2.8003	2.35183	2.8003	2.20662
2.791	2.37939	2.791	2.20423
2.7827	2.38859	2.7827	2.2021
2.7688	2.34446	2.7688	2.19856
2.7555	2.33319	2.7555	2.19518
2.7465	2.34285	2.7465	2.19291
2.7372	2.36686	2.7372	2.19056
2.7285	2.37567	2.7285	2.18838
2.7239	2.35472	2.7239	2.18723
2.7063	2.35369	2.7063	2.18284
2.697	2.33349	2.697	2.18053
2.6881	2.3206	2.6881	2.17833
2.6791	2.34834	2.6791	2.17611
2.6698	2.32894	2.6698	2.17382
2.6609	2.35406	2.6609	2.17164
2.6519	2.32653	2.6519	2.16945
2.6426	2.34939	2.6426	2.16718
2.634	2.3333	2.634	2.1651
2.6158	2.36287	2.6158	2.16071
2.6068	2.35268	2.6068	2.15855
2.5979	2.33678	2.5979	2.15642
2.5885	2.34506	2.5885	2.15418
2.5799	2.32822	2.5799	2.15214
2.5706	2.32352	2.5706	2.14994
2.5613	2.33253	2.5613	2.14775
2.5524	2.31116	2.5524	2.14566
2.5438	2.32038	2.5438	2.14364
2.5255	2.29851	2.5255	2.13938
2.5168	2.3489	2.5168	2.13737
2.5076	2.3303	2.5076	2.13524
2.4982	2.32843	2.4982	2.13308
2.489	2.34016	2.489	2.13097
2.48	2.33689	2.48	2.12892
2.471	2.30983	2.471	2.12687
2.4621	2.35003	2.4621	2.12486
2.4535	2.34102	2.4535	2.12291
2.4442	2.33711	2.4442	2.12082
2.4259	2.32255	2.4259	2.11673
2.4259	2.32449	2.4259	2.11673
2.408	2.34704	2.408	2.11275
2.3988	2.32704	2.3988	2.11072
2.3901	2.32187	2.3901	2.10881
2.3812	2.32023	2.3812	2.10686
2.3719	2.34147	2.3719	2.10482
2.3626	2.33441	2.3626	2.1028
2.354	2.33154	2.354	2.10094
2.3447	2.33244	2.3447	2.09893
2.3268	2.32383	2.3268	2.09509
2.3178	2.33296	2.3178	2.09317
2.3089	2.32411	2.3089	2.09128
2.2996	2.35437	2.2996	2.08931
2.2912	2.33394	2.2912	2.08754
2.2819	2.33617	2.2819	2.08558
2.2725	2.35359	2.2725	2.08362
2.2633	2.3149	2.2633	2.0817
2.255	2.3513	2.255	2.07998
2.2368	2.34996	2.2368	2.07622
2.2368	2.34605	2.2368	2.07622
2.2188	2.34392	2.2188	2.07254
2.2099	2.35628	2.2099	2.07073
2.2006	2.34742	2.2006	2.06884
2.1916	2.33815	2.1916	2.06702
2.183	2.30256	2.183	2.0653
2.1738	2.35519	2.1738	2.06346
2.1645	2.37273	2.1645	2.0616
2.1559	2.36038	2.1559	2.05989
2.1465	2.34229	2.1465	2.05804
2.129	2.36435	2.129	2.0546
2.1197	2.32174	2.1197	2.05278
2.1104	2.34589	2.1104	2.05098
2.1017	2.33704	2.1017	2.04929
2.0925	2.35359	2.0925	2.04752
2.0838	2.3769	2.0838	2.04585
2.0746	2.3433	2.0746	2.04409
2.0656	2.35307	2.0656	2.04238
2.0566	2.35476	2.0566	2.04068
2.0476	2.35969	2.0476	2.03898
2.0297	2.34812	2.0297	2.03563
2.0204	2.34802	2.0204	2.0339
2.0114	2.36648	2.0114	2.03223
2.0028	2.37849	2.0028	2.03064
1.9935	2.35515	1.9935	2.02894
1.9846	2.34251	1.9846	2.02731
1.9756	2.36536	1.9756	2.02567
1.9667	2.34928	1.9667	2.02406
1.9577	2.37947	1.9577	2.02244
1.9395	2.3741	1.9395	2.01918
1.9309	2.37819	1.9309	2.01765
1.9216	2.36047	1.9216	2.01601
1.9123	2.39054	1.9123	2.01437
1.9037	2.37216	1.9037	2.01286
1.8944	2.37628	1.8944	2.01124
1.8857	2.38258	1.8857	2.00973
1.8768	2.37778	1.8768	2.00819
1.8675	2.38289	1.8675	2.00659
1.8582	2.38535	1.8582	2.005
1.8492	2.39223	1.8492	2.00346
1.8316	2.36031	1.8316	2.00049
1.8223	2.41398	1.8223	1.99893
1.813	2.39529	1.813	1.99737
1.8047	2.4009	1.8047	1.99599
1.7954	2.40874	1.7954	1.99446
1.7861	2.42697	1.7861	1.99293
1.7775	2.43983	1.7775	1.99152
1.7686	2.42138	1.7686	1.99007
1.7593	2.41777	1.7593	1.98856
1.7506	2.42691	1.7506	1.98716
1.7321	2.46312	1.7321	1.9842
1.7234	2.42851	1.7234	1.98282
1.7146	2.43206	1.7146	1.98143
1.7052	2.43486	1.7052	1.97995
1.6959	2.45656	1.6959	1.9785
1.6869	2.46326	1.6869	1.9771
1.678	2.44476	1.678	1.97572
1.6694	2.43781	1.6694	1.9744
1.6601	2.45217	1.6601	1.97298
1.6419	2.46856	1.6419	1.97022
1.6329	2.48048	1.6329	1.96886
1.6236	2.46792	1.6236	1.96747
1.615	2.48083	1.615	1.96619
1.6057	2.49225	1.6057	1.96482
1.597	2.47825	1.597	1.96354
1.5877	2.48466	1.5877	1.96218
1.5787	2.50407	1.5787	1.96087
1.5694	2.5024	1.5694	1.95952
1.5509	2.50416	1.5509	1.95687
1.5426	2.51025	1.5426	1.95569
1.5333	2.5018	1.5333	1.95438
1.5243	2.51109	1.5243	1.95311
1.515	2.52379	1.515	1.95181
1.5064	2.53769	1.5064	1.95062
1.4971	2.53624	1.4971	1.94934
1.4882	2.5453	1.4882	1.94812
1.4786	2.52877	1.4786	1.94681
1.4653	2.55583	1.4653	1.94501
1.4607	2.56172	1.4607	1.94439
1.4431	2.57587	1.4431	1.94204
1.4338	2.57311	1.4338	1.94081
1.4245	2.58166	1.4245	1.93959
1.4162	2.59219	1.4162	1.93851
1.407	2.60107	1.407	1.93732
1.398	2.58103	1.398	1.93616
1.3887	2.5853	1.3887	1.93496
1.3797	2.61043	1.3797	1.93382
1.3617	2.59371	1.3617	1.93155
1.3524	2.5935	1.3524	1.93039
1.3438	2.617	1.3438	1.92933
1.3348	2.63725	1.3348	1.92822
1.3255	2.63375	1.3255	1.92708
1.3169	2.65317	1.3169	1.92604
1.3076	2.65029	1.3076	1.92492
1.299	2.65512	1.299	1.92389
1.2897	2.65307	1.2897	1.92278
1.2764	2.68349	1.2764	1.92122
1.2626	2.68467	1.2626	1.91961
1.2536	2.67206	1.2536	1.91857
1.245	2.7157	1.245	1.91758
1.2357	2.70198	1.2357	1.91652
1.2264	2.70818	1.2264	1.91547
1.2178	2.7189	1.2178	1.9145
1.2088	2.7104	1.2088	1.9135
1.1999	2.73753	1.1999	1.91251
1.1905	2.75942	1.1905	1.91148
1.1723	2.74481	1.1723	1.9095
1.1637	2.74	1.1637	1.90858
1.1547	2.77734	1.1547	1.90762
1.1457	2.76952	1.1457	1.90667
1.1364	2.77713	1.1364	1.9057
1.1275	2.78834	1.1275	1.90477
1.1188	2.8328	1.1188	1.90387
1.1095	2.81655	1.1095	1.90292
1.1003	2.82158	1.1003	1.90199
1.0873	2.82581	1.0873	1.90068
1.0734	2.83027	1.0734	1.8993
1.0648	2.84732	1.0648	1.89846
1.0555	2.85873	1.0555	1.89755
1.0468	2.88241	1.0468	1.89671
1.0376	2.88493	1.0376	1.89583
1.0284	2.89287	1.0284	1.89496
1.0194	2.89493	1.0194	1.89411
1.0104	2.92323	1.0104	1.89327
1.0011	2.92118	1.0011	1.89241
0.9835	2.94157	0.9835	1.89081
0.9743	2.92863	0.9743	1.88998
0.9656	2.9587	0.9656	1.8892
0.9567	2.94172	0.9567	1.88842
0.9474	2.95199	0.9474	1.8876
0.9384	2.96219	0.9384	1.88682
0.9295	2.96475	0.9295	1.88606
0.9205	2.99871	0.9205	1.8853
0.9115	3.0117	0.9115	1.88454
0.8979	3.02677	0.8979	1.88341
0.8843	3.03226	0.8843	1.88229
0.8753	3.03506	0.8753	1.88157
0.866	3.01581	0.866	1.88082
0.8571	3.03869	0.8571	1.88012
0.8481	3.03342	0.8481	1.87941
0.8389	3.05977	0.8389	1.8787
0.8305	3.06643	0.8305	1.87806
0.8212	3.09429	0.8212	1.87735
0.8119	3.08474	0.8119	1.87665
0.794	3.08609	0.794	1.87533
0.7851	3.10713	0.7851	1.87469
0.7758	3.11972	0.7758	1.87402
0.7672	3.12737	0.7672	1.87341
0.7579	3.14633	0.7579	1.87276
0.7489	3.14198	0.7489	1.87214
0.74	3.16129	0.74	1.87153
0.7311	3.16856	0.7311	1.87093
0.7131	3.1743	0.7131	1.86973
0.7131	3.16608	0.7131	1.86973
0.6949	3.19752	0.6949	1.86855
0.6856	3.20801	0.6856	1.86796
0.6763	3.2058	0.6763	1.86738
0.6676	3.22861	0.6676	1.86684
0.6587	3.23966	0.6587	1.8663
0.6494	3.25796	0.6494	1.86574
0.6404	3.25329	0.6404	1.86521
0.6315	3.27067	0.6315	1.86469
0.6225	3.26224	0.6225	1.86417
0.6132	3.28247	0.6132	1.86364
0.5953	3.30696	0.5953	1.86265
0.5863	3.29514	0.5863	1.86216
0.5774	3.317	0.5774	1.86169
0.5681	3.32325	0.5681	1.8612
0.5591	3.33443	0.5591	1.86073
0.5502	3.31902	0.5502	1.86028
0.5409	3.35239	0.5409	1.85981
0.5326	3.35463	0.5326	1.8594
0.5141	3.36898	0.5141	1.85851
0.5055	3.36931	0.5055	1.85811
0.4962	3.36049	0.4962	1.85768
0.4872	3.39612	0.4872	1.85727
0.4782	3.40989	0.4782	1.85688
0.4689	3.41229	0.4689	1.85647
0.46	3.41651	0.46	1.85609
0.4512	3.44252	0.4512	1.85572
0.442	3.42785	0.442	1.85535
0.4241	3.43067	0.4241	1.85463
0.4148	3.44492	0.4148	1.85427
0.4058	3.45831	0.4058	1.85394
0.3972	3.4447	0.3972	1.85362
0.3879	3.47589	0.3879	1.85328
0.379	3.45894	0.379	1.85297
0.3704	3.48186	0.3704	1.85267
0.3611	3.47895	0.3611	1.85236
0.3521	3.48431	0.3521	1.85207
0.3429	3.51618	0.3429	1.85177
0.3253	3.51119	0.3253	1.85123
0.316	3.47899	0.316	1.85096
0.3067	3.5014	0.3067	1.85069
0.2981	3.50977	0.2981	1.85045
0.2888	3.51164	0.2888	1.8502
0.2802	3.56543	0.2802	1.84998
0.2712	3.5574	0.2712	1.84975
0.2619	3.53408	0.2619	1.84952
0.2529	3.55492	0.2529	1.84931
0.2351	3.54992	0.2351	1.84891
0.226	3.56736	0.226	1.84872
0.2167	3.53795	0.2167	1.84853
0.2074	3.55119	0.2074	1.84835
0.1992	3.55928	0.1992	1.84819
0.1899	3.56524	0.1899	1.84803
0.1809	3.57826	0.1809	1.84787
0.1719	3.59912	0.1719	1.84773
0.163	3.60196	0.163	1.84759
0.1537	3.59256	0.1537	1.84746
0.1358	3.5754	0.1358	1.84722
0.1272	3.60075	0.1272	1.84711
0.1179	3.58723	0.1179	1.84701
0.109	3.59584	0.109	1.84692
0.1	3.61544	0.1	1.84683
0.0907	3.60766	0.0907	1.84675
0.0731	3.63411	0.0731	1.84662
0.0731	3.62048	0.0731	1.84662
0.0545	3.63866	0.0545	1.84651
0.0459	3.62746	0.0459	1.84647
0.037	3.60625	0.037	1.84643
0.028	3.62869	0.028	1.84641
0.0188	3.63468	0.0188	1.84639
0.0098	3.64367	0.0098	1.84637
0.0004	3.64188	0.0004	1.84637
-0.0004	3.64188	-0.0004	1.84637
-0.0098	3.64367	-0.0098	1.84637
-0.0188	3.63468	-0.0188	1.84639
-0.028	3.62869	-0.028	1.84641
-0.037	3.60625	-0.037	1.84643
-0.0459	3.62746	-0.0459	1.84647
-0.0545	3.63866	-0.0545	1.84651
-0.0731	3.62048	-0.0731	1.84662
-0.0731	3.63411	-0.0731	1.84662
-0.0907	3.60766	-0.0907	1.84675
-0.1	3.61544	-0.1	1.84683
-0.109	3.59584	-0.109	1.84692
-0.1179	3.58723	-0.1179	1.84701
-0.1272	3.60075	-0.1272	1.84711
-0.1358	3.5754	-0.1358	1.84722
-0.1537	3.59256	-0.1537	1.84746
-0.163	3.60196	-0.163	1.84759
-0.1719	3.59912	-0.1719	1.84773
-0.1809	3.57826	-0.1809	1.84787
-0.1899	3.56524	-0.1899	1.84803
-0.1992	3.55928	-0.1992	1.84819
-0.2074	3.55119	-0.2074	1.84835
-0.2167	3.53795	-0.2167	1.84853
-0.226	3.56736	-0.226	1.84872
-0.2351	3.54992	-0.2351	1.84891
-0.2529	3.55492	-0.2529	1.84931
-0.2619	3.53408	-0.2619	1.84952
-0.2712	3.5574	-0.2712	1.84975
-0.2802	3.56543	-0.2802	1.84998
-0.2888	3.51164	-0.2888	1.8502
-0.2981	3.50977	-0.2981	1.85045
-0.3067	3.5014	-0.3067	1.85069
-0.316	3.47899	-0.316	1.85096
-0.3253	3.51119	-0.3253	1.85123
-0.3429	3.51618	-0.3429	1.85177
-0.3521	3.48431	-0.3521	1.85207
-0.3611	3.47895	-0.3611	1.85236
-0.3704	3.48186	-0.3704	1.85267
-0.379	3.45894	-0.379	1.85297
-0.3879	3.47589	-0.3879	1.85328
-0.3972	3.4447	-0.3972	1.85362
-0.4058	3.45831	-0.4058	1.85394
-0.4148	3.44492	-0.4148	1.85427
-0.4241	3.43067	-0.4241	1.85463
-0.442	3.42785	-0.442	1.85535
-0.4512	3.44252	-0.4512	1.85572
-0.46	3.41651	-0.46	1.85609
-0.4689	3.41229	-0.4689	1.85647
-0.4782	3.40989	-0.4782	1.85688
-0.4872	3.39612	-0.4872	1.85727
-0.4962	3.36049	-0.4962	1.85768
-0.5055	3.36931	-0.5055	1.85811
-0.5141	3.36898	-0.5141	1.85851
-0.5326	3.35463	-0.5326	1.8594
-0.5409	3.35239	-0.5409	1.85981
-0.5502	3.31902	-0.5502	1.86028
-0.5591	3.33443	-0.5591	1.86073
-0.5681	3.32325	-0.5681	1.8612
-0.5774	3.317	-0.5774	1.86169
-0.5863	3.29514	-0.5863	1.86216
-0.5953	3.30696	-0.5953	1.86265
-0.6132	3.28247	-0.6132	1.86364
-0.6225	3.26224	-0.6225	1.86417
-0.6315	3.27067	-0.6315	1.86469
-0.6404	3.25329	-0.6404	1.86521
-0.6494	3.25796	-0.6494	1.86574
-0.6587	3.23966	-0.6587	1.8663
-0.6676	3.22861	-0.6676	1.86684
-0.6763	3.2058	-0.6763	1.86738
-0.6856	3.20801	-0.6856	1.86796
-0.6949	3.19752	-0.6949	1.86855
-0.7131	3.16608	-0.7131	1.86973
-0.7131	3.1743	-0.7131	1.86973
-0.7311	3.16856	-0.7311	1.87093
-0.74	3.16129	-0.74	1.87153
-0.7489	3.14198	-0.7489	1.87214
-0.7579	3.14633	-0.7579	1.87276
-0.7672	3.12737	-0.7672	1.87341
-0.7758	3.11972	-0.7758	1.87402
-0.7851	3.10713	-0.7851	1.87469
-0.794	3.08609	-0.794	1.87533
-0.8119	3.08474	-0.8119	1.87665
-0.8212	3.09429	-0.8212	1.87735
-0.8305	3.06643	-0.8305	1.87806
-0.8389	3.05977	-0.8389	1.8787
-0.8481	3.03342	-0.8481	1.87941
-0.8571	3.03869	-0.8571	1.88012
-0.866	3.01581	-0.866	1.88082
-0.8753	3.03506	-0.8753	1.88157
-0.8843	3.03226	-0.8843	1.88229
-0.8979	3.02677	-0.8979	1.88341
-0.9115	3.0117	-0.9115	1.88454
-0.9205	2.99871	-0.9205	1.8853
-0.9295	2.96475	-0.9295	1.88606
-0.9384	2.96219	-0.9384	1.88682
-0.9474	2.95199	-0.9474	1.8876
-0.9567	2.94172	-0.9567	1.88842
-0.9656	2.9587	-0.9656	1.8892
-0.9743	2.92863	-0.9743	1.88998
-0.9835	2.94157	-0.9835	1.89081
-1.0011	2.92118	-1.0011	1.89241
-1.0104	2.92323	-1.0104	1.89327
-1.0194	2.89493	-1.0194	1.89411
-1.0284	2.89287	-1.0284	1.89496
-1.0376	2.88493	-1.0376	1.89583
-1.0468	2.88241	-1.0468	1.89671
-1.0555	2.85873	-1.0555	1.89755
-1.0648	2.84732	-1.0648	1.89846
-1.0734	2.83027	-1.0734	1.8993
-1.0873	2.82581	-1.0873	1.90068
-1.1003	2.82158	-1.1003	1.90199
-1.1095	2.81655	-1.1095	1.90292
-1.1188	2.8328	-1.1188	1.90387
-1.1275	2.78834	-1.1275	1.90477
-1.1364	2.77713	-1.1364	1.9057
-1.1457	2.76952	-1.1457	1.90667
-1.1547	2.77734	-1.1547	1.90762
-1.1637	2.74	-1.1637	1.90858
-1.1723	2.74481	-1.1723	1.9095
-1.1905	2.75942	-1.1905	1.91148
-1.1999	2.73753	-1.1999	1.91251
-1.2088	2.7104	-1.2088	1.9135
-1.2178	2.7189	-1.2178	1.9145
-1.2264	2.70818	-1.2264	1.91547
-1.2357	2.70198	-1.2357	1.91652
-1.245	2.7157	-1.245	1.91758
-1.2536	2.67206	-1.2536	1.91857
-1.2626	2.68467	-1.2626	1.91961
-1.2764	2.68349	-1.2764	1.92122
-1.2897	2.65307	-1.2897	1.92278
-1.299	2.65512	-1.299	1.92389
-1.3076	2.65029	-1.3076	1.92492
-1.3169	2.65317	-1.3169	1.92604
-1.3255	2.63375	-1.3255	1.92708
-1.3348	2.63725	-1.3348	1.92822
-1.3438	2.617	-1.3438	1.92933
-1.3524	2.5935	-1.3524	1.93039
-1.3617	2.59371	-1.3617	1.93155
-1.3797	2.61043	-1.3797	1.93382
-1.3887	2.5853	-1.3887	1.93496
-1.398	2.58103	-1.398	1.93616
-1.407	2.60107	-1.407	1.93732
-1.4162	2.59219	-1.4162	1.93851
-1.4245	2.58166	-1.4245	1.93959
-1.4338	2.57311	-1.4338	1.94081
-1.4431	2.57587	-1.4431	1.94204
-1.4607	2.56172	-1.4607	1.94439
-1.4653	2.55583	-1.4653	1.94501
-1.4786	2.52877	-1.4786	1.94681
-1.4882	2.5453	-1.4882	1.94812
-1.4971	2.53624	-1.4971	1.94934
-1.5064	2.53769	-1.5064	1.95062
-1.515	2.52379	-1.515	1.95181
-1.5243	2.51109	-1.5243	1.95311
-1.5333	2.5018	-1.5333	1.95438
-1.5426	2.51025	-1.5426	1.95569
-1.5509	2.50416	-1.5509	1.95687
-1.5694	2.5024	-1.5694	1.95952
-1.5787	2.50407	-1.5787	1.96087
-1.5877	2.48466	-1.5877	1.96218
-1.597	2.47825	-1.597	1.96354
-1.6057	2.49225	-1.6057	1.96482
-1.615	2.48083	-1.615	1.96619
-1.6236	2.46792	-1.6236	1.96747
-1.6329	2.48048	-1.6329	1.96886
-1.6419	2.46856	-1.6419	1.97022
-1.6601	2.45217	-1.6601	1.97298
-1.6694	2.43781	-1.6694	1.9744
-1.678	2.44476	-1.678	1.97572
-1.6869	2.46326	-1.6869	1.9771
-1.6959	2.45656	-1.6959	1.9785
-1.7052	2.43486	-1.7052	1.97995
-1.7146	2.43206	-1.7146	1.98143
-1.7234	2.42851	-1.7234	1.98282
-1.7321	2.46312	-1.7321	1.9842
-1.7506	2.42691	-1.7506	1.98716
-1.7593	2.41777	-1.7593	1.98856
-1.7686	2.42138	-1.7686	1.99007
-1.7775	2.43983	-1.7775	1.99152
-1.7861	2.42697	-1.7861	1.99293
-1.7954	2.40874	-1.7954	1.99446
-1.8047	2.4009	-1.8047	1.99599
-1.813	2.39529	-1.813	1.99737
-1.8223	2.41398	-1.8223	1.99893
-1.8316	2.36031	-1.8316	2.00049
-1.8492	2.39223	-1.8492	2.00346
-1.8582	2.38535	-1.8582	2.005
-1.8675	2.38289	-1.8675	2.00659
-1.8768	2.37778	-1.8768	2.00819
-1.8857	2.38258	-1.8857	2.00973
-1.8944	2.37628	-1.8944	2.01124
-1.9037	2.37216	-1.9037	2.01286
-1.9123	2.39054	-1.9123	2.01437
-1.9216	2.36047	-1.9216	2.01601
-1.9309	2.37819	-1.9309	2.01765
-1.9395	2.3741	-1.9395	2.01918
-1.9577	2.37947	-1.9577	2.02244
-1.9667	2.34928	-1.9667	2.02406
-1.9756	2.36536	-1.9756	2.02567
-1.9846	2.34251	-1.9846	2.02731
-1.9935	2.35515	-1.9935	2.02894
-2.0028	2.37849	-2.0028	2.03064
-2.0114	2.36648	-2.0114	2.03223
-2.0204	2.34802	-2.0204	2.0339
-2.0297	2.34812	-2.0297	2.03563
-2.0476	2.35969	-2.0476	2.03898
-2.0566	2.35476	-2.0566	2.04068
-2.0656	2.35307	-2.0656	2.04238
-2.0746	2.3433	-2.0746	2.04409
-2.0838	2.3769	-2.0838	2.04585
-2.0925	2.35359	-2.0925	2.04752
-2.1017	2.33704	-2.1017	2.04929
-2.1104	2.34589	-2.1104	2.05098
-2.1197	2.32174	-2.1197	2.05278
-2.129	2.36435	-2.129	2.0546
-2.1465	2.34229	-2.1465	2.05804
-2.1559	2.36038	-2.1559	2.05989
-2.1645	2.37273	-2.1645	2.0616
-2.1738	2.35519	-2.1738	2.06346
-2.183	2.30256	-2.183	2.0653
-2.1916	2.33815	-2.1916	2.06702
-2.2006	2.34742	-2.2006	2.06884
-2.2099	2.35628	-2.2099	2.07073
-2.2188	2.34392	-2.2188	2.07254
-2.2368	2.34605	-2.2368	2.07622
-2.2368	2.34996	-2.2368	2.07622
-2.255	2.3513	-2.255	2.07998
-2.2633	2.3149	-2.2633	2.0817
-2.2725	2.35359	-2.2725	2.08362
-2.2819	2.33617	-2.2819	2.08558
-2.2912	2.33394	-2.2912	2.08754
-2.2996	2.35437	-2.2996	2.08931
-2.3089	2.32411	-2.3089	2.09128
-2.3178	2.33296	-2.3178	2.09317
-2.3268	2.32383	-2.3268	2.09509
-2.3447	2.33244	-2.3447	2.09893
-2.354	2.33154	-2.354	2.10094
-2.3626	2.33441	-2.3626	2.1028
-2.3719	2.34147	-2.3719	2.10482
-2.3812	2.32023	-2.3812	2.10686
-2.3901	2.32187	-2.3901	2.10881
-2.3988	2.32704	-2.3988	2.11072
-2.408	2.34704	-2.408	2.11275
-2.4259	2.32449	-2.4259	2.11673
-2.4259	2.32255	-2.4259	2.11673
-2.4442	2.33711	-2.4442	2.12082
-2.4535	2.34102	-2.4535	2.12291
-2.4621	2.35003	-2.4621	2.12486
-2.471	2.30983	-2.471	2.12687
-2.48	2.33689	-2.48	2.12892
-2.489	2.34016	-2.489	2.13097
-2.4982	2.32843	-2.4982	2.13308
-2.5076	2.3303	-2.5076	2.13524
-2.5168	2.3489	-2.5168	2.13737
-2.5255	2.29851	-2.5255	2.13938
-2.5438	2.32038	-2.5438	2.14364
-2.5524	2.31116	-2.5524	2.14566
-2.5613	2.33253	-2.5613	2.14775
-2.5706	2.32352	-2.5706	2.14994
-2.5799	2.32822	-2.5799	2.15214
-2.5885	2.34506	-2.5885	2.15418
-2.5979	2.33678	-2.5979	2.15642
-2.6068	2.35268	-2.6068	2.15855
-2.6158	2.36287	-2.6158	2.16071
-2.634	2.3333	-2.634	2.1651
-2.6426	2.34939	-2.6426	2.16718
-2.6519	2.32653	-2.6519	2.16945
-2.6609	2.35406	-2.6609	2.17164
-2.6698	2.32894	-2.6698	2.17382
-2.6791	2.34834	-2.6791	2.17611
-2.6881	2.3206	-2.6881	2.17833
-2.697	2.33349	-2.697	2.18053
-2.7063	2.35369	-2.7063	2.18284
-2.7239	2.35472	-2.7239	2.18723
-2.7285	2.37567	-2.7285	2.18838
-2.7372	2.36686	-2.7372	2.19056
-2.7465	2.34285	-2.7465	2.19291
-2.7555	2.33319	-2.7555	2.19518
-2.7688	2.34446	-2.7688	2.19856
-2.7827	2.38859	-2.7827	2.2021
-2.791	2.37939	-2.791	2.20423
-2.8003	2.35183	-2.8003	2.20662
-2.8096	2.3678	-2.8096	2.20901
-2.8185	2.36058	-2.8185	2.21131
-2.8275	2.37797	-2.8275	2.21365
-2.8361	2.36719	-2.8361	2.21589
-2.8501	2.36457	-2.8501	2.21954
-2.8547	2.34617	-2.8547	2.22075
-2.8723	2.36855	-2.8723	2.22538
-2.8815	2.38867	-2.8815	2.22781
-2.8902	2.40287	-2.8902	2.23012
-2.8994	2.38136	-2.8994	2.23257
-2.9087	2.3568	-2.9087	2.23505
-2.9174	2.36805	-2.9174	2.23738
-2.9263	2.36945	-2.9263	2.23976
-2.9356	2.39128	-2.9356	2.24227
-2.9535	2.38085	-2.9535	2.24711
-2.9578	2.37679	-2.9578	2.24828
-2.9715	2.38695	-2.9715	2.25201
-2.9808	2.38963	-2.9808	2.25455
-2.9895	2.40915	-2.9895	2.25694
-2.9984	2.38905	-2.9984	2.25939
-3.0077	2.38888	-3.0077	2.26196
-3.0167	2.4006	-3.0167	2.26445
-3.0257	2.40859	-3.0257	2.26694
-3.0392	2.37477	-3.0392	2.27071
-3.0525	2.40003	-3.0525	2.27443
-3.0618	2.40015	-3.0618	2.27704
-3.0711	2.40285	-3.0711	2.27966
-3.0804	2.3855	-3.0804	2.28229
-3.089	2.35806	-3.089	2.28473
-3.0982	2.37437	-3.0982	2.28734
-3.1072	2.41024	-3.1072	2.28991
-3.1165	2.40738	-3.1165	2.29257
-3.1248	2.42684	-3.1248	2.29495
-3.1341	2.39848	-3.1341	2.29762
-3.1434	2.3862	-3.1434	2.3003
-3.1613	2.41541	-3.1613	2.30549
-3.1702	2.42488	-3.1702	2.30807
-3.1795	2.42207	-3.1795	2.31079
-3.1882	2.43525	-3.1882	2.31333
-3.1975	2.41299	-3.1975	2.31606
-3.2068	2.38937	-3.2068	2.3188
-3.2155	2.39317	-3.2155	2.32136
-3.2248	2.41392	-3.2248	2.32412
-3.2337	2.45188	-3.2337	2.32676
-3.243	2.46036	-3.243	2.32952
-3.252	2.42981	-3.252	2.33221
-3.2699	2.43834	-3.2699	2.33757
-3.2788	2.42077	-3.2788	2.34025
-3.2877	2.43791	-3.2877	2.34293
-3.2967	2.45269	-3.2967	2.34566
-3.3061	2.44996	-3.3061	2.34851
-3.3153	2.44013	-3.3153	2.35131
-3.324	2.45333	-3.324	2.35396
-3.3332	2.45574	-3.3332	2.35677
-3.3508	2.42382	-3.3508	2.36218
-3.3508	2.42495	-3.3508	2.36218
-3.3694	2.45151	-3.3694	2.36792
-3.378	2.44554	-3.378	2.37059
-3.387	2.48213	-3.387	2.37338
-3.3963	2.47493	-3.3963	2.37628
-3.4055	2.43546	-3.4055	2.37916
-3.4141	2.42547	-3.4141	2.38185
-3.4231	2.50446	-3.4231	2.38468
-3.4321	2.4517	-3.4321	2.38751
-3.4411	2.4707	-3.4411	2.39035
-3.455	2.47526	-3.455	2.39476
-3.4683	2.47862	-3.4683	2.39899
-3.4772	2.47057	-3.4772	2.40183
-3.4862	2.50553	-3.4862	2.40471
-3.4955	2.49628	-3.4955	2.40769
-3.5045	2.48443	-3.5045	2.41058
-3.5131	2.46071	-3.5131	2.41336
-3.5224	2.48813	-3.5224	2.41636
-3.5364	2.50664	-3.5364	2.4209
-3.5496	2.53032	-3.5496	2.4252
-3.5585	2.51664	-3.5585	2.4281
-3.5675	2.49373	-3.5675	2.43105
-3.5764	2.50055	-3.5764	2.43397
-3.5854	2.48364	-3.5854	2.43693
-3.5943	2.49604	-3.5943	2.43987
-3.6033	2.54165	-3.6033	2.44284
-3.6123	2.4921	-3.6123	2.44583
-3.6215	2.50061	-3.6215	2.44889
-3.6391	2.50709	-3.6391	2.45476
-3.6485	2.54087	-3.6485	2.4579
-3.6578	2.52598	-3.6578	2.46102
-3.6664	2.49634	-3.6664	2.46392
-3.6755	2.50382	-3.6755	2.46699
-3.6844	2.49989	-3.6844	2.47
-3.694	2.52863	-3.694	2.47325
-3.7026	2.5276	-3.7026	2.47617
-3.7119	2.54262	-3.7119	2.47934
-3.7209	2.52133	-3.7209	2.48241
-3.7388	2.5215	-3.7388	2.48855
-3.7481	2.56128	-3.7481	2.49175
-3.7567	2.53395	-3.7567	2.49471
-3.7657	2.51083	-3.7657	2.49782
-3.775	2.49215	-3.775	2.50104
-3.7843	2.57399	-3.7843	2.50427
-3.7928	2.57554	-3.7928	2.50723
-3.8018	2.54494	-3.8018	2.51037
-3.8107	2.53419	-3.8107	2.51348
-3.829	2.55786	-3.829	2.51991
-3.8383	2.52773	-3.8383	2.52318
-3.8476	2.57546	-3.8476	2.52647
-3.8566	2.58886	-3.8566	2.52965
-3.8652	2.5381	-3.8652	2.5327
-3.8745	2.5389	-3.8745	2.53601
-3.8834	2.55264	-3.8834	2.53918
-3.8921	2.57808	-3.8921	2.54229
-3.9014	2.5475	-3.9014	2.54562
-3.9107	2.57754	-3.9107	2.54896
-3.929	2.54587	-3.929	2.55555
-3.929	2.55701	-3.929	2.55555
-3.9469	2.59896	-3.9469	2.56202
-3.9555	2.56419	-3.9555	2.56515
-3.9648	2.60361	-3.9648	2.56853
-3.9741	2.57673	-3.9741	2.57192
-3.983	2.60404	-3.983	2.57518
-3.9917	2.57181	-3.9917	2.57836
-4.001	2.5603	-4.001	2.58178
-4.0103	2.5391	-4.0103	2.5852
-4.0278	2.594	-4.0278	2.59166
-4.0371	2.59784	-4.0371	2.59511
-4.046	2.5793	-4.046	2.59841
-4.055	2.60119	-4.055	2.60176
-4.064	2.60912	-4.064	2.60512
-4.0729	2.61113	-4.0729	2.60845
-4.0819	2.58795	-4.0819	2.61182
-4.0912	2.60472	-4.0912	2.61531
-4.1005	2.61861	-4.1005	2.61881
-4.1094	2.64083	-4.1094	2.62217
-4.1317	2.64763	-4.1317	2.63061
-4.1317	2.65376	-4.1317	2.63061
-4.1404	2.64729	-4.1404	2.63392
-4.1497	2.64292	-4.1497	2.63746
-4.1589	2.62256	-4.1589	2.64097
-4.1765	2.67151	-4.1765	2.64771
-4.1858	2.65492	-4.1858	2.65128
-4.1945	2.64791	-4.1945	2.65463
-4.2038	2.65212	-4.2038	2.65822
-4.2127	2.67142	-4.2127	2.66166
-4.2217	2.68518	-4.2217	2.66515
-4.2306	2.64629	-4.2306	2.6686
-4.2396	2.6634	-4.2396	2.67211
-4.2574	2.666	-4.2574	2.67905
-4.2668	2.67802	-4.2668	2.68273
-4.2757	2.68124	-4.2757	2.68623
-4.2847	2.68007	-4.2847	2.68977
-4.2933	2.71012	-4.2933	2.69316
-4.3026	2.68459	-4.3026	2.69683
-4.3118	2.68877	-4.3118	2.70047
-4.3201	2.6691	-4.3201	2.70376
-4.3295	2.69519	-4.3295	2.7075
-4.3474	2.69159	-4.3474	2.71463
-4.3474	2.69105	-4.3474	2.71463
-4.366	2.70536	-4.366	2.72208
-4.3747	2.70068	-4.3747	2.72557
-4.3836	2.72425	-4.3836	2.72915
-4.3926	2.72161	-4.3926	2.73278
-4.4019	2.70401	-4.4019	2.73654
-4.4108	2.71112	-4.4108	2.74014
-4.4195	2.72867	-4.4195	2.74367
-4.4288	2.73597	-4.4288	2.74745
-4.4381	2.75813	-4.4381	2.75124
-4.4557	2.73691	-4.4557	2.75843
-4.4557	2.73709	-4.4557	2.75843
-4.4738	2.72554	-4.4738	2.76585
-4.4828	2.74448	-4.4828	2.76956
-4.4914	2.77791	-4.4914	2.7731
-4.5007	2.761	-4.5007	2.77694
-4.5096	2.78235	-4.5096	2.78063
-4.519	2.79421	-4.519	2.78453
-4.5276	2.76852	-4.5276	2.7881
-4.5369	2.77398	-4.5369	2.79197
-4.5548	2.77723	-4.5548	2.79945
-4.5641	2.77328	-4.5641	2.80335
-4.5731	2.78527	-4.5731	2.80712
-4.5817	2.77858	-4.5817	2.81074
-4.5911	2.79353	-4.5911	2.8147
-4.6004	2.78501	-4.6004	2.81863
-4.6093	2.83111	-4.6093	2.82239
-4.618	2.79235	-4.618	2.82608
-4.6272	2.80292	-4.6272	2.82999
-4.6362	2.8316	-4.6362	2.83382
-4.6455	2.81929	-4.6455	2.83779
-4.664	2.81331	-4.664	2.8457
-4.6723	2.83038	-4.6723	2.84926
-4.6816	2.81331	-4.6816	2.85325
-4.6906	2.81419	-4.6906	2.85713
-4.6996	2.82405	-4.6996	2.86101
-4.7088	2.84565	-4.7088	2.86499
-4.7178	2.83843	-4.7178	2.86889
-4.7267	2.83403	-4.7267	2.87275
-4.7357	2.87968	-4.7357	2.87666
-4.745	2.83025	-4.745	2.88071
-4.7626	2.85471	-4.7626	2.8884
-4.7719	2.8626	-4.7719	2.89247
-4.7808	2.86391	-4.7808	2.89638
-4.7898	2.86837	-4.7898	2.90033
-4.7988	2.86857	-4.7988	2.9043
-4.8077	2.8445	-4.8077	2.90823
-4.8173	2.89314	-4.8173	2.91247
-4.8264	2.87859	-4.8264	2.9165
-4.8443	2.87355	-4.8443	2.92446
-4.8532	2.87895	-4.8532	2.92842
-4.8625	2.89946	-4.8625	2.93257
-4.8715	2.91358	-4.8715	2.9366
-4.8801	2.89886	-4.8801	2.94045
-4.8894	2.88961	-4.8894	2.94462
-4.8984	2.88131	-4.8984	2.94867
-4.9077	2.90598	-4.9077	2.95286
-4.9256	2.91252	-4.9256	2.96094
-4.9256	2.91921	-4.9256	2.96094
-4.9435	2.90731	-4.9435	2.96906
-4.9527	2.97922	-4.9527	2.97324
-4.9617	2.89959	-4.9617	2.97734
-4.9703	2.92004	-4.9703	2.98127
-4.9796	2.90786	-4.9796	2.98552
-4.9882	2.93111	-4.9882	2.98946
-4.9975	2.92175	-4.9975	2.99372
-5.0068	2.9329	-5.0068	2.998
-5.0245	2.97557	-5.0245	3.00615
-5.0338	2.95234	-5.0338	3.01045
-5.0427	2.95681	-5.0427	3.01457
-5.0514	2.9265	-5.0514	3.0186
-5.0607	2.97943	-5.0607	3.02292
-5.0697	2.93135	-5.0697	3.02711
-5.079	2.96087	-5.079	3.03145
-5.0873	2.98259	-5.0873	3.03533
-5.0966	3.01784	-5.0966	3.03968
-5.1148	2.99434	-5.1148	3.04821
-5.1234	3.03101	-5.1234	3.05226
-5.1327	3.01143	-5.1327	3.05664
-5.1413	3.01962	-5.1413	3.0607
-5.1506	3.00464	-5.1506	3.0651
-5.1599	3.01416	-5.1599	3.0695
-5.1685	3.03845	-5.1685	3.07358
-5.1778	3.03124	-5.1778	3.078
-5.1957	3.03512	-5.1957	3.08653
-5.205	3.01573	-5.205	3.09098
-5.2136	3.03256	-5.2136	3.09509
-5.2226	3.02365	-5.2226	3.09941
-5.2319	3.02911	-5.2319	3.10388
-5.2405	3.05392	-5.2405	3.10801
-5.2498	3.05848	-5.2498	3.11249
-5.2587	3.06316	-5.2587	3.11679
-5.2677	3.06704	-5.2677	3.12114
-5.2767	3.08435	-5.2767	3.1255
-5.286	3.09914	-5.286	3.13002
-5.3036	3.14184	-5.3036	3.13858
-5.3129	3.10278	-5.3129	3.14311
-5.3219	3.06587	-5.3219	3.14751
-5.3309	3.0639	-5.3309	3.15192
-5.3395	3.1122	-5.3395	3.15613
-5.3488	3.11584	-5.3488	3.1607
-5.3581	3.10538	-5.3581	3.16527
-5.367	3.11155	-5.367	3.16966
-5.3756	3.16504	-5.3756	3.1739
-5.3849	3.15257	-5.3849	3.1785
-5.4028	3.14006	-5.4028	3.18737
-5.4121	3.16786	-5.4121	3.19199
-5.4207	3.13256	-5.4207	3.19627
-5.4297	3.17014	-5.4297	3.20076
-5.439	3.16813	-5.439	3.2054
-5.4479	3.13172	-5.4479	3.20985
-5.4569	3.15247	-5.4569	3.21436
-5.4658	3.16377	-5.4658	3.21883
-5.4841	3.20331	-5.4841	3.22803
-5.4927	3.21173	-5.4927	3.23237
-5.5017	3.21617	-5.5017	3.23691
-5.5111	3.20223	-5.5111	3.24167
-5.52	3.19538	-5.52	3.24618
-5.529	3.18733	-5.529	3.25075
-5.538	3.20526	-5.538	3.25532
-5.5466	3.23325	-5.5466	3.2597
-5.5559	3.18117	-5.5559	3.26445
-5.5744	3.18708	-5.5744	3.27391
-5.5744	3.22297	-5.5744	3.27391
-5.592	3.23903	-5.592	3.28294
-5.6013	3.25761	-5.6013	3.28772
-5.6103	3.25582	-5.6103	3.29235
-5.6192	3.24667	-5.6192	3.29694
-5.6282	3.23843	-5.6282	3.30159
-5.6371	3.25251	-5.6371	3.3062
-5.6468	3.26221	-5.6468	3.31123
-5.6554	3.24286	-5.6554	3.31569
-5.6736	3.29804	-5.6736	3.32517
-5.6823	3.28709	-5.6823	3.32971
-5.6915	3.3018	-5.6915	3.33451
-5.7009	3.31979	-5.7009	3.33943
-5.7095	3.298	-5.7095	3.34394
-5.7184	3.29056	-5.7184	3.34861
-5.7277	3.3243	-5.7277	3.3535
-5.7367	3.32691	-5.7367	3.35824
-5.7457	3.34697	-5.7457	3.36299
-5.755	3.26884	-5.755	3.3679
-5.773	3.29113	-5.773	3.37744
-5.7819	3.32494	-5.7819	3.38216
-5.7908	3.37576	-5.7908	3.38689
-5.7998	3.32049	-5.7998	3.39169
-5.8088	3.36192	-5.8088	3.39648
-5.8181	3.32713	-5.8181	3.40145
-5.827	3.36725	-5.827	3.40621
-5.836	3.38381	-5.836	3.41104
-5.8446	3.34926	-5.8446	3.41565
-5.8631	3.39968	-5.8631	3.4256
-5.8631	3.37525	-5.8631	3.4256
-5.8807	3.39807	-5.8807	3.4351
-5.89	3.44638	-5.89	3.44013
-5.8987	3.41339	-5.8987	3.44484
-5.9079	3.42128	-5.9079	3.44983
-5.9172	3.37095	-5.9172	3.45488
-5.9258	3.4071	-5.9258	3.45956
-5.9352	3.41549	-5.9352	3.46468
-5.9438	3.42505	-5.9438	3.46937
-5.9531	3.44006	-5.9531	3.47446
-5.9711	3.38764	-5.9711	3.48432
-5.9801	3.40452	-5.9801	3.48926
-5.9893	3.41764	-5.9893	3.49432
-5.998	3.4804	-5.998	3.49911
-6.007	3.41253	-6.007	3.50407
-6.0162	3.44047	-6.0162	3.50915
-6.0252	3.45235	-6.0252	3.51413
-6.0341	3.46488	-6.0341	3.51906
-6.0521	3.46892	-6.0521	3.52906
-6.061	3.48825	-6.061	3.53401
-6.0703	3.46056	-6.0703	3.53919
-6.0789	3.49417	-6.0789	3.54399
-6.0882	3.49434	-6.0882	3.54919
-6.0968	3.48256	-6.0968	3.554
-6.1061	3.50539	-6.1061	3.55922
-6.1154	3.52145	-6.1154	3.56444
-6.1237	3.5161	-6.1237	3.56911
-6.133	3.52829	-6.133	3.57434
-6.1509	3.52474	-6.1509	3.58444
-6.1602	3.51212	-6.1602	3.5897
-6.1692	3.5559	-6.1692	3.5948
-6.1781	3.54442	-6.1781	3.59985
-6.1871	3.56507	-6.1871	3.60496
-6.1961	3.55559	-6.1961	3.61008
-6.2054	3.5671	-6.2054	3.61538
-6.214	3.56067	-6.214	3.62029
-6.2233	3.54142	-6.2233	3.6256
-6.2323	3.58544	-6.2323	3.63075
-6.2416	3.55053	-6.2416	3.63608
-6.2592	3.57396	-6.2592	3.64619
-6.2684	3.57034	-6.2684	3.65148
-6.2771	3.6009	-6.2771	3.6565
-6.2861	3.62705	-6.2861	3.66169
-6.2954	3.60622	-6.2954	3.66707
-6.3043	3.65957	-6.3043	3.67222
-6.3132	3.66355	-6.3132	3.67738
-6.3225	3.6633	-6.3225	3.68278
-6.3311	3.63718	-6.3311	3.68778
-6.3491	3.66588	-6.3491	3.69826
-6.3584	3.68368	-6.3584	3.70369
-6.3676	3.63225	-6.3676	3.70907
-6.3763	3.6963	-6.3763	3.71416
-6.3853	3.6622	-6.3853	3.71944
-6.3945	3.68211	-6.3945	3.72484
-6.4032	3.6972	-6.4032	3.72995
-6.4125	3.70212	-6.4125	3.73543
-6.4304	3.67217	-6.4304	3.74599
-6.4394	3.6816	-6.4394	3.75131
-6.4487	3.74907	-6.4487	3.75682
-6.4573	3.74127	-6.4573	3.76192
-6.4663	3.74785	-6.4663	3.76726
-6.4756	3.76539	-6.4756	3.77279
-6.4846	3.74233	-6.4846	3.77815
-6.4935	3.74587	-6.4935	3.78346
-6.5025	3.74663	-6.5025	3.78883
-6.5114	3.74323	-6.5114	3.79415
-6.5297	3.76954	-6.5297	3.80511
-6.5343	3.77834	-6.5343	3.80787
-6.5476	3.78257	-6.5476	3.81587
-6.5568	3.7958	-6.5568	3.82141
-6.5655	3.76415	-6.5655	3.82665
-6.5748	3.79761	-6.5748	3.83226
-6.5837	3.78077	-6.5837	3.83764
-6.5927	3.82289	-6.5927	3.84309
-6.602	3.84428	-6.602	3.84873
-6.6113	3.85509	-6.6113	3.85437
-6.6202	3.8401	-6.6202	3.85978
-6.6378	3.88098	-6.6378	3.8705
-6.6471	3.87395	-6.6471	3.87618
-6.6561	3.84934	-6.6561	3.88168
-6.6654	3.85479	-6.6654	3.88737
-6.6741	3.84085	-6.6741	3.8927
-6.6833	3.85924	-6.6833	3.89835
-6.6926	3.92489	-6.6926	3.90406
-6.7013	3.92498	-6.7013	3.90942
-6.7106	3.90104	-6.7106	3.91515
-6.7196	3.91749	-6.7196	3.9207
-6.7375	3.93316	-6.7375	3.93177
-6.7468	3.94256	-6.7468	3.93753
-6.7551	3.91529	-6.7551	3.94268
-6.7643	3.95667	-6.7643	3.94839
-6.7736	4.00044	-6.7736	3.95417
-6.7829	3.98916	-6.7829	3.95997
-6.7912	3.93796	-6.7912	3.96514
-6.8005	4.00632	-6.8005	3.97095
-6.819	3.97924	-6.819	3.98252
-6.819	4.01149	-6.819	3.98252
-6.8369	3.96853	-6.8369	3.99375
-6.8459	3.99103	-6.8459	3.99941
-6.8549	4.03191	-6.8549	4.00507
-6.8639	3.98892	-6.8639	4.01075
-6.8731	4.02598	-6.8731	4.01655
-6.8814	4.02016	-6.8814	4.0218
-6.8908	4.06413	-6.8908	4.02774
-6.9001	4.04268	-6.9001	4.03364
-6.9177	4.05461	-6.9177	4.04481
-6.927	4.06274	-6.927	4.05072
-6.936	4.08027	-6.936	4.05646
-6.9449	4.07051	-6.9449	4.06213
-6.9542	4.06908	-6.9542	4.06807
-6.9628	4.0984	-6.9628	4.07357
-6.9721	4.11318	-6.9721	4.07952
-6.9811	4.09949	-6.9811	4.08529
-6.99	4.08197	-6.99	4.091
-7.0085	4.09936	-7.0085	4.1029
-7.0172	4.12063	-7.0172	4.10851
-7.0261	4.13108	-7.0261	4.11425
-7.0355	4.12349	-7.0355	4.12032
-7.0441	4.18349	-7.0441	4.12588
-7.0531	4.17529	-7.0531	4.13171
-7.0623	4.1864	-7.0623	4.13768
-7.0716	4.1719	-7.0716	4.14372
-7.0803	4.12414	-7.0803	4.14937
-7.0892	4.16691	-7.0892	4.15517
-7.1071	4.14017	-7.1071	4.16684
-7.1165	4.15258	-7.1165	4.17298
-7.1251	4.2052	-7.1251	4.17861
-7.1344	4.24262	-7.1344	4.1847
-7.1434	4.15653	-7.1434	4.1906
-7.1523	4.20024	-7.1523	4.19645
-7.1616	4.23336	-7.1616	4.20256
-7.1705	4.20015	-7.1705	4.20842
-7.1792	4.20551	-7.1792	4.21416
-7.1971	4.22128	-7.1971	4.22598
-7.2064	4.23907	-7.2064	4.23214
-7.2157	4.23676	-7.2157	4.2383
-7.2247	4.2349	-7.2247	4.24427
-7.2332	4.29706	-7.2332	4.24991
-7.2425	4.26859	-7.2425	4.2561
-7.2515	4.23463	-7.2515	4.26209
-7.2601	4.30015	-7.2601	4.26782
-7.2694	4.28184	-7.2694	4.27403
-7.2784	4.3222	-7.2784	4.28005
-7.2877	4.25043	-7.2877	4.28627
-7.3053	4.3078	-7.3053	4.29807
-7.3146	4.29569	-7.3146	4.30431
-7.3239	4.30352	-7.3239	4.31057
-7.3322	4.32005	-7.3322	4.31616
-7.3415	4.2645	-7.3415	4.32243
-7.3505	4.3442	-7.3505	4.3285
-7.3594	4.32173	-7.3594	4.33452
-7.3687	4.36268	-7.3687	4.34081
-7.3867	4.37818	-7.3867	4.35301
-7.3956	4.31454	-7.3956	4.35905
-7.4046	4.36553	-7.4046	4.36517
-7.4139	4.38127	-7.4139	4.3715
-7.4225	4.38661	-7.4225	4.37737
-7.4315	4.41193	-7.4315	4.38351
-7.4408	4.42614	-7.4408	4.38986
-7.45	4.35214	-7.45	4.39615
-7.459	4.39097	-7.459	4.40232
-7.4676	4.46651	-7.4676	4.40822
-7.4858	4.42668	-7.4858	4.42072
-7.4901	4.43267	-7.4901	4.42368
-7.5038	4.44483	-7.5038	4.43311
-7.513	4.43914	-7.513	4.43946
-7.522	4.45298	-7.522	4.44568
-7.531	4.46705	-7.531	4.4519
-7.5402	4.47572	-7.5402	4.45827
-7.5492	4.43203	-7.5492	4.46451
-7.5581	4.48526	-7.5581	4.47069
-7.5671	4.43372	-7.5671	4.47694
-7.5765	4.51441	-7.5765	4.48348
-7.5941	4.51145	-7.5941	4.49575
-7.6034	4.50324	-7.6034	4.50224
-7.6126	4.49853	-7.6126	4.50867
-7.6216	4.47547	-7.6216	4.51497
-7.6303	4.47478	-7.6303	4.52106
-7.6395	4.51953	-7.6395	4.52752
-7.6482	4.48333	-7.6482	4.53363
-7.6575	4.59319	-7.6575	4.54017
-7.6667	4.5375	-7.6667	4.54664
-7.676	4.56325	-7.676	4.5532
-7.6843	4.52964	-7.6843	4.55906
-7.7025	4.54444	-7.7025	4.57192
-7.7115	4.58743	-7.7115	4.57829
-7.7208	4.58128	-7.7208	4.58489
-7.7294	4.60744	-7.7294	4.59099
-7.7387	4.62798	-7.7387	4.5976
-7.7476	4.6364	-7.7476	4.60393
-7.7566	4.63319	-7.7566	4.61034
-7.7656	4.58447	-7.7656	4.61676
-7.7835	4.65748	-7.7835	4.62955
-7.7928	4.64861	-7.7928	4.6362
-7.8011	4.66278	-7.8011	4.64215
-7.8105	4.66517	-7.8105	4.64889
-7.8197	4.66137	-7.8197	4.6555
-7.8287	4.64385	-7.8287	4.66197
-7.8377	4.65014	-7.8377	4.66844
-7.8466	4.68064	-7.8466	4.67486
-7.8556	4.64386	-7.8556	4.68135
-7.8649	4.6936	-7.8649	4.68806
-7.8825	4.72058	-7.8825	4.7008
-7.8917	4.67218	-7.8917	4.70746
-7.9004	4.67161	-7.9004	4.71378
-7.9096	4.70467	-7.9096	4.72046
-7.9189	4.75057	-7.9189	4.72722
-7.9282	4.75899	-7.9282	4.73399
-7.9365	4.73404	-7.9365	4.74004
-7.9458	4.78421	-7.9458	4.74683
-7.9547	4.75154	-7.9547	4.75333
-7.9726	4.72357	-7.9726	4.76642
-7.9816	4.71712	-7.9816	4.77302
-7.9909	4.83322	-7.9909	4.77984
-7.9998	4.75076	-7.9998	4.78638
-8.0085	4.75161	-8.0085	4.79278
-8.0177	4.75017	-8.0177	4.79955
-8.0267	4.7753	-8.0267	4.80619
-8.0357	4.78751	-8.0357	4.81283
-8.0537	4.76165	-8.0537	4.82613
-8.0626	4.7948	-8.0626	4.83272
-8.0719	4.82504	-8.0719	4.83962
-8.0812	4.84572	-8.0812	4.84652
-8.0898	4.88981	-8.0898	4.85291
-8.0988	4.79362	-8.0988	4.8596
-8.1078	4.83448	-8.1078	4.8663
-8.1171	4.84488	-8.1171	4.87323
-8.126	4.83244	-8.126	4.87987
-8.1346	4.86015	-8.1346	4.8863
-8.1532	4.88463	-8.1532	4.90022
-8.1618	4.88631	-8.1618	4.90666
-8.1711	4.84019	-8.1711	4.91364
-8.1801	4.85644	-8.1801	4.9204
-8.1887	4.86975	-8.1887	4.92687
-8.198	4.93322	-8.198	4.93387
-8.2069	4.88059	-8.2069	4.94058
-8.2156	4.99122	-8.2156	4.94714
-8.2248	4.91536	-8.2248	4.95409
-8.2431	5.02123	-8.2431	4.96793
-8.252	4.98765	-8.252	4.97468
-8.2607	4.94674	-8.2607	4.98128
-8.27	4.98333	-8.27	4.98834
-8.2793	4.99187	-8.2793	4.99541
-8.2879	5.03316	-8.2879	5.00196
-8.2969	5.01339	-8.2969	5.00881
-8.3059	4.98868	-8.3059	5.01568
-8.3148	5.0773	-8.3148	5.02247
-8.3241	5.02799	-8.3241	5.02958
-8.3421	5.02166	-8.3421	5.04336
-8.351	5.06753	-8.351	5.05019
-8.36	5.07945	-8.36	5.0571
-8.3693	5.09916	-8.3693	5.06425
-8.3782	5.06304	-8.3782	5.07109
-8.3871	5.10786	-8.3871	5.07795
-8.396	5.07306	-8.396	5.08481
-8.4053	5.0923	-8.4053	5.09199
-8.4146	5.15896	-8.4146	5.09917
-8.423	5.14415	-8.423	5.10567
-8.4322	5.13372	-8.4322	5.1128
-8.4505	5.08779	-8.4505	5.12699
-8.4598	5.14627	-8.4598	5.13421
-8.4684	5.16401	-8.4684	5.1409
-8.4777	5.20304	-8.4777	5.14814
-8.4866	5.16976	-8.4866	5.15508
-8.4957	5.17	-8.4957	5.16218
-8.5049	5.16698	-8.5049	5.16936
-8.5136	5.18446	-8.5136	5.17616
-8.5318	5.13368	-8.5318	5.19042
-8.5318	5.15984	-8.5318	5.19042
-8.55	5.25879	-8.55	5.2047
-8.5587	5.21764	-8.5587	5.21154
-8.568	5.23837	-8.568	5.21885
-8.5773	5.24836	-8.5773	5.22618
-8.5859	5.24576	-8.5859	5.23296
-8.5948	5.21948	-8.5948	5.23998
-8.6041	5.30126	-8.6041	5.24733
-8.6127	5.23417	-8.6127	5.25413
-8.622	5.29453	-8.622	5.2615
-8.6359	5.26261	-8.6359	5.27252
-8.6489	5.32635	-8.6489	5.28284
-8.6582	5.33281	-8.6582	5.29024
-8.6671	5.33688	-8.6671	5.29732
-8.6761	5.35693	-8.6761	5.30449
-8.6851	5.39384	-8.6851	5.31167
-8.6943	5.34415	-8.6943	5.31901
-8.7033	5.35635	-8.7033	5.32621
-8.7122	5.40882	-8.7122	5.33333
-8.7209	5.37767	-8.7209	5.3403
-8.7395	5.46222	-8.7395	5.35521
-8.7482	5.46508	-8.7482	5.3622
-8.7575	5.49369	-8.7575	5.36968
-8.7664	5.47899	-8.7664	5.37685
-8.775	5.45217	-8.775	5.38378
-8.7843	5.46883	-8.7843	5.39128
-8.7936	5.48736	-8.7936	5.39879
-8.8022	5.48403	-8.8022	5.40574
-8.8201	5.52926	-8.8201	5.42023
-8.8294	5.50711	-8.8294	5.42777
-8.8384	5.51694	-8.8384	5.43508
-8.847	5.53724	-8.847	5.44207
-8.8563	5.5928	-8.8563	5.44963
-8.8655	5.53141	-8.8655	5.45712
-8.8742	5.54133	-8.8742	5.46421
-8.8835	5.46237	-8.8835	5.4718
-8.8924	5.55502	-8.8924	5.47907
-8.9014	5.55204	-8.9014	5.48642
-8.9103	5.55382	-8.9103	5.4937
-8.9286	5.58807	-8.9286	5.5087
-8.9372	5.61486	-8.9372	5.51576
-8.9465	5.62904	-8.9465	5.5234
-8.9559	5.63886	-8.9559	5.53113
-8.9651	5.66298	-8.9651	5.53871
-8.9734	5.65094	-8.9734	5.54555
-8.9827	5.66601	-8.9827	5.55322
-8.9919	5.6908	-8.9919	5.56081
-8.9999	5.74309	-8.9999	5.56743

## Sheet: Fig2a
nT (cm2)	nB (cm2)	Rdrag (Ω)
5813550000000	-460324000000	0.77545
5811820000000	-482724000000	0.76304
5810100000000	-505124000000	0.75105
5808370000000	-527524000000	0.715
5806640000000	-549924000000	0.70916
5804910000000	-572324000000	0.68853
5803180000000	-594724000000	0.67188
5801450000000	-617124000000	0.6544
5799720000000	-639524000000	0.61344
5797990000000	-661924000000	0.58924
5796260000000	-684324000000	0.59514
5794530000000	-706724000000	0.56323
5792810000000	-729124000000	0.5485
5791080000000	-751524000000	0.52249
5789350000000	-773924000000	0.51225
5787620000000	-796324000000	0.49735
5785890000000	-818724000000	0.46664
5784160000000	-841124000000	0.47036
5782430000000	-863524000000	0.45143
5780700000000	-885924000000	0.43044
5778970000000	-908324000000	0.43458
5777250000000	-930724000000	0.42186
5775520000000	-953124000000	0.39724
5773790000000	-975524000000	0.39104
5772060000000	-997924000000	0.39078
5770330000000	-1020320000000	0.37144
5768600000000	-1042720000000	0.36947
5766870000000	-1065120000000	0.37154
5765140000000	-1087520000000	0.3553
5763410000000	-1109920000000	0.33203
5761680000000	-1132320000000	0.32299
5759960000000	-1154720000000	0.32402
5758230000000	-1177120000000	0.32402
5756500000000	-1199520000000	0.30696
5754770000000	-1221920000000	0.29925
5753040000000	-1244320000000	0.30277
5751310000000	-1266720000000	0.29015
5749580000000	-1289120000000	0.28069
5747850000000	-1311520000000	0.29232
5746120000000	-1333920000000	0.263
5744400000000	-1356320000000	0.26331
5742670000000	-1378720000000	0.25612
5740940000000	-1401120000000	0.25478
5739210000000	-1423520000000	0.27334
5737480000000	-1445920000000	0.2434
5735750000000	-1468320000000	0.23197
5734020000000	-1490720000000	0.24511
5732290000000	-1513120000000	0.24149
5730560000000	-1535520000000	0.23849
5728840000000	-1557920000000	0.22784
5727110000000	-1580320000000	0.23813
5725380000000	-1602720000000	0.21672
5723650000000	-1625120000000	0.22117
5721920000000	-1647520000000	0.22132
5720190000000	-1669920000000	0.21646
5718460000000	-1692320000000	0.21289
5716730000000	-1714720000000	0.20214
5715000000000	-1737120000000	0.19293
5713270000000	-1759520000000	0.19526
5711550000000	-1781920000000	0.18321
5709820000000	-1804320000000	0.18507
5708090000000	-1826720000000	0.18182
5706360000000	-1849120000000	0.17758
5704630000000	-1871520000000	0.17737
5702900000000	-1893920000000	0.18895
5701170000000	-1916320000000	0.19071
5699440000000	-1938720000000	0.17649
5697710000000	-1961120000000	0.16418
5695990000000	-1983520000000	0.16935
5694260000000	-2005920000000	0.17173
5692530000000	-2028320000000	0.16713
5690800000000	-2050720000000	0.14122
5689070000000	-2073120000000	0.15508
5687340000000	-2095520000000	0.15575
5685610000000	-2117920000000	0.17458
5683880000000	-2140320000000	0.15875
5682150000000	-2162720000000	0.15208
5680420000000	-2185120000000	0.15451
5678700000000	-2207520000000	0.14996
5676970000000	-2229920000000	0.14153
5675240000000	-2252320000000	0.14474
5673510000000	-2274720000000	0.13388
5671780000000	-2297120000000	0.13812
5670050000000	-2319520000000	0.12917
5668320000000	-2341920000000	0.14205
5666590000000	-2364320000000	0.13905
5664860000000	-2386720000000	0.1286
5663140000000	-2409120000000	0.13021
5661410000000	-2431520000000	0.10927
5659680000000	-2453920000000	0.14438
5657950000000	-2476320000000	0.12669
5656220000000	-2498720000000	0.12126
5654490000000	-2521120000000	0.11821
5652760000000	-2543520000000	0.12054
5651030000000	-2565920000000	0.11035
5649300000000	-2588320000000	0.12416
5647580000000	-2610720000000	0.10885
5645850000000	-2633120000000	0.11821
5644120000000	-2655520000000	0.12881
5642390000000	-2677920000000	0.11888
5640660000000	-2700320000000	0.12504
5638930000000	-2722720000000	0.12695
5637200000000	-2745120000000	0.09453
5635470000000	-2767520000000	0.09644
5633740000000	-2789920000000	0.10389
5632010000000	-2812320000000	0.10058
5630290000000	-2834720000000	0.10673
5628560000000	-2857120000000	0.10115
5626830000000	-2879520000000	0.09618
5625100000000	-2901920000000	0.0952
5623370000000	-2924320000000	0.10399
5621640000000	-2946720000000	0.1119
5619910000000	-2969120000000	0.10461
5618180000000	-2991520000000	0.10746
5616450000000	-3013920000000	0.11625
5614730000000	-3036320000000	0.09934
5613000000000	-3058720000000	0.0937
5611270000000	-3081120000000	0.09453
5609540000000	-3103520000000	0.09551
5607810000000	-3125920000000	0.1059
5606080000000	-3148320000000	0.09903
5604350000000	-3170720000000	0.10663
5602620000000	-3193120000000	0.10409
5600890000000	-3215520000000	0.10084
5599160000000	-3237920000000	0.11376
5597440000000	-3260320000000	0.08517
5595710000000	-3282720000000	0.08119
5593980000000	-3305120000000	0.09303
5592250000000	-3327520000000	0.06862
5590520000000	-3349920000000	0.10554
5588790000000	-3372320000000	0.09365
5587060000000	-3394720000000	0.08408
5585330000000	-3417120000000	0.11547
5583600000000	-3439520000000	0.0876
5581880000000	-3461920000000	0.10394
5580150000000	-3484320000000	0.08636
5578420000000	-3506720000000	0.07855
5576690000000	-3529120000000	0.10053
5574960000000	-3551520000000	0.09173
5573230000000	-3573920000000	0.0952
5571500000000	-3596320000000	0.07994
5569770000000	-3618720000000	0.08439
5568040000000	-3641120000000	0.09494
5566320000000	-3663520000000	0.07622
5564590000000	-3685920000000	0.09086
5562860000000	-3708320000000	0.07808
5561130000000	-3730720000000	0.10435
5559400000000	-3753120000000	0.07777
5557670000000	-3775520000000	0.06531
5555940000000	-3797920000000	0.07457
5554210000000	-3820320000000	0.10156
5552480000000	-3842720000000	0.08641
5550750000000	-3865120000000	0.0695
5549030000000	-3887520000000	0.12168
5547300000000	-3909920000000	0.07881
5545570000000	-3932320000000	0.08806
5543840000000	-3954720000000	0.06774
5542110000000	-3977120000000	0.07338
5540380000000	-3999520000000	0.06169
5538650000000	-4021920000000	0.07229
5536920000000	-4044320000000	0.06764
5535190000000	-4066720000000	0.05471
5533470000000	-4089120000000	0.06862
5531740000000	-4111520000000	0.0725
5530010000000	-4133920000000	0.06278
5528280000000	-4156320000000	0.07281
5526550000000	-4178720000000	0.06748
5524820000000	-4201120000000	0.07415
5523090000000	-4223520000000	0.07214
5521360000000	-4245920000000	0.0666
5519630000000	-4268320000000	0.05031
5517900000000	-4290720000000	0.06143
5516180000000	-4313120000000	0.04711
5514450000000	-4335520000000	0.07679
5512720000000	-4357920000000	0.03377
5510990000000	-4380320000000	0.06045
5509260000000	-4402720000000	0.07064
5507530000000	-4425120000000	0.04985
5505800000000	-4447520000000	0.03946
5504070000000	-4469920000000	0.04752
5502340000000	-4492320000000	0.03992
5500620000000	-4514720000000	0.03604
5498890000000	-4537120000000	0.06598
5497160000000	-4559520000000	0.05047
5495430000000	-4581920000000	0.03278
5493700000000	-4604320000000	0.04664
5491970000000	-4626720000000	0.06029
5490240000000	-4649120000000	0.04064
5488510000000	-4671520000000	0.05099
5486780000000	-4693920000000	0.04571
5485050000000	-4716320000000	0.04297
5483330000000	-4738720000000	0.05264
5481600000000	-4761120000000	0.03682
5479870000000	-4783520000000	0.02136
5478140000000	-4805920000000	0.08367
5476410000000	-4828320000000	0.05285
5474680000000	-4850720000000	0.04902
5472950000000	-4873120000000	0.05523
5471220000000	-4895520000000	0.0014
5469490000000	-4917920000000	0.05218
5467770000000	-4940320000000	0.08175
5466040000000	-4962720000000	0.03273
5464310000000	-4985120000000	0.04199
5462580000000	-5007520000000	0.03796
5460850000000	-5029920000000	0.04747
5459120000000	-5052320000000	0.03377
5457390000000	-5074720000000	0.03247
5455660000000	-5097120000000	0.03263
5453930000000	-5119520000000	0.04742
5452210000000	-5141920000000	0.06748
5450480000000	-5164320000000	0.02286
5448750000000	-5186720000000	0.03992
5447020000000	-5209120000000	0.04628
5445290000000	-5231520000000	0.01686
5443560000000	-5253920000000	0.02162
5441830000000	-5276320000000	0.03413
5440100000000	-5298720000000	0.00848
5438370000000	-5321120000000	0.0107
5436640000000	-5343520000000	0.00657
5434920000000	-5365920000000	0.07276
5433190000000	-5388320000000	0.04773
5431460000000	-5410720000000	0.05243
5429730000000	-5433120000000	0.02544
5428000000000	-5455520000000	0.03278
5426270000000	-5477920000000	0.0545
5424540000000	-5500320000000	0.05647
5422810000000	-5522720000000	0.03315
5421080000000	-5545120000000	0.07069
5419360000000	-5567520000000	-0.01831
5417630000000	-5589920000000	0.04421
5415900000000	-5612320000000	0.0107
5414170000000	-5634720000000	0.10844
5412440000000	-5657120000000	0.04245
5410710000000	-5679520000000	-0.04297
5408980000000	-5701920000000	0.04897
5407250000000	-5724320000000	-0.00683
5405520000000	-5746720000000	0.04597
5403790000000	-5769120000000	-0.00802
5402070000000	-5791520000000	0.00983
5400340000000	-5813920000000	0.04308
5398610000000	-5836320000000	0.07596
5396880000000	-5858720000000	0.02203
5395150000000	-5881120000000	0.06624
5393420000000	-5903520000000	0.01913
5391690000000	-5925920000000	0.05595
5389960000000	-5948320000000	0.09592
5388230000000	-5970720000000	0.04701
5386510000000	-5993120000000	0.09065
5384780000000	-6015520000000	0.03423
5383050000000	-6037920000000	0.08356
5381320000000	-6060320000000	0.0619
5379590000000	-6082720000000	0.07038
5377860000000	-6105120000000	0.06945
5376130000000	-6127520000000	0.04711
5374400000000	-6149920000000	0.0604
5372670000000	-6172320000000	0.0348
5370950000000	-6194720000000	0.05062
5369220000000	-6217120000000	0.05233
5367490000000	-6239520000000	0.06035
5365760000000	-6261920000000	0.03827
5364030000000	-6284320000000	0.06102
5362300000000	-6306720000000	0.05714
5360570000000	-6329120000000	0.06273
5358840000000	-6351520000000	0.05973
5357110000000	-6373920000000	0.07007
5355380000000	-6396320000000	0.05823
5353660000000	-6418720000000	0.08134
5351930000000	-6441120000000	0.05352
5350200000000	-6463520000000	0.01872
5348470000000	-6485920000000	0.03646
5346740000000	-6508320000000	0.05487
5345010000000	-6530720000000	0.05316
5343280000000	-6553120000000	0.04995
5341550000000	-6575520000000	0.07255
5339820000000	-6597920000000	0.03594
5338100000000	-6620320000000	0.04209
5336370000000	-6642720000000	0.04432
5334640000000	-6665120000000	0.06583
5332910000000	-6687520000000	0.06159
5331180000000	-6709920000000	0.05838
5329450000000	-6732320000000	0.06355
5327720000000	-6754720000000	0.02875
5325990000000	-6777120000000	0.03651
5324260000000	-6799520000000	0.05042
5322530000000	-6821920000000	0.04101
5320810000000	-6844320000000	0.04085
5319080000000	-6866720000000	0.03992
5317350000000	-6889120000000	0.05998
5315620000000	-6911520000000	0.04944
5313890000000	-6933920000000	0.05838
5312160000000	-6956320000000	0.06784
5310430000000	-6978720000000	0.05874
5308700000000	-7001120000000	0.04401
5306970000000	-7023520000000	0.05905
5305250000000	-7045920000000	0.03553
5303520000000	-7068320000000	0.03082
5301790000000	-7090720000000	0.0438
5300060000000	-7113120000000	0.04975
5298330000000	-7135520000000	0.03765
5296600000000	-7157920000000	0.04406
5294870000000	-7180320000000	0.04845
5293140000000	-7202720000000	0.04339
5291410000000	-7225120000000	0.05885
5289680000000	-7247520000000	0.05978
5287960000000	-7269920000000	0.06541
5286230000000	-7292320000000	0.03894
5284500000000	-7314720000000	0.05693
5282770000000	-7337120000000	0.0787
5281040000000	-7359520000000	0.05114
5279310000000	-7381920000000	0.03454
5277580000000	-7404320000000	0.0437
5275850000000	-7426720000000	0.03242
5274120000000	-7449120000000	0.0438
5272400000000	-7471520000000	0.0363
5270670000000	-7493920000000	0.03935
5268940000000	-7516320000000	0.0378
5267210000000	-7538720000000	0.04675
5265480000000	-7561120000000	0.04556
5263750000000	-7583520000000	0.04664
5262020000000	-7605920000000	0.06986
5260290000000	-7628320000000	0.04323
5258560000000	-7650720000000	0.05507
5256840000000	-7673120000000	0.05249
5255110000000	-7695520000000	0.02565
5253380000000	-7717920000000	0.03832
5251650000000	-7740320000000	0.05388
5249920000000	-7762720000000	0.05161
5248190000000	-7785120000000	0.05161
5246460000000	-7807520000000	0.04582
5244730000000	-7829920000000	0.04463
5243000000000	-7852320000000	0.04282
5241270000000	-7874720000000	0.04695
5239550000000	-7897120000000	0.03728
5237820000000	-7919520000000	0.02467
5236090000000	-7941920000000	0.04494
5234360000000	-7964320000000	0.03309
5232630000000	-7986720000000	0.0407
5230900000000	-8009120000000	0.04023
5229170000000	-8031520000000	0.04592
5227440000000	-8053920000000	0.04054
5225710000000	-8076320000000	0.05135
5223990000000	-8098720000000	0.03087
5222260000000	-8121120000000	0.0575
5220530000000	-8143520000000	0.04613
5218800000000	-8165920000000	0.04349
5217070000000	-8188320000000	0.03092
5215340000000	-8210720000000	0.03599
5213610000000	-8233120000000	0.04359
5211880000000	-8255520000000	0.03232
5210150000000	-8277920000000	0.05259
5208420000000	-8300320000000	0.03061
5206700000000	-8322720000000	0.05212
5204970000000	-8345120000000	0.0364
5203240000000	-8367520000000	0.04339
5201510000000	-8389920000000	0.03915
5199780000000	-8412320000000	0.04757
5198050000000	-8434720000000	0.03961
5196320000000	-8457120000000	0.04933
5194590000000	-8479520000000	0.03356
5192860000000	-8501920000000	0.0559
5191140000000	-8524320000000	0.04892
5189410000000	-8546720000000	0.05502
5187680000000	-8569120000000	0.04318
5185950000000	-8591520000000	0.05802
5184220000000	-8613920000000	0.03894
5182490000000	-8636320000000	0.05187
5180760000000	-8658720000000	0.02746
5179030000000	-8681120000000	0.04514
5177300000000	-8703520000000	0.05776
5175580000000	-8725920000000	0.03718
5173850000000	-8748320000000	0.05455
5172120000000	-8770720000000	0.02901
5170390000000	-8793120000000	0.03682
5168660000000	-8815520000000	0.02632
5166930000000	-8837920000000	0.0437
5165200000000	-8860320000000	0.02239
5163470000000	-8882720000000	0.03154
5161740000000	-8905120000000	0.00253
5160010000000	-8927520000000	0.02901
5158290000000	-8949920000000	0.03284
5156560000000	-8972320000000	0.03397
5154830000000	-8994720000000	0.02844
5153100000000	-9017120000000	0.0544
5151370000000	-9039520000000	0.05755
5149640000000	-9061920000000	0.03377
5147910000000	-9084320000000	0.05585
5146180000000	-9106720000000	0.03765
5144450000000	-9129120000000	0.03599
5142730000000	-9151520000000	0.03315
5141000000000	-9173920000000	0.03077
5139270000000	-9196320000000	0.03087
5137540000000	-9218720000000	0.02549
5135810000000	-9241120000000	0.05724
5134080000000	-9263520000000	0.01748
5132350000000	-9285920000000	0.03904
5130620000000	-9308320000000	0.01898
5128890000000	-9330720000000	0.04127
5127160000000	-9353120000000	0.02368
5125440000000	-9375520000000	0.03625
5123710000000	-9397920000000	0.02829
5121980000000	-9420320000000	0.03604
5120250000000	-9442720000000	0.01541
5118520000000	-9465120000000	0.04271
5116790000000	-9487520000000	0.03956
5115060000000	-9509920000000	0.02948
5113330000000	-9532320000000	0.03191
5111600000000	-9554720000000	0.04638
5109880000000	-9577120000000	0.04256
5108150000000	-9599520000000	0.07115
5106420000000	-9621920000000	0.0377
5104690000000	-9644320000000	0.03946
5102960000000	-9666720000000	0.02761
5101230000000	-9689120000000	0.03206
5099500000000	-9711520000000	0.03883
5097770000000	-9733920000000	0.04468
5096040000000	-9756320000000	0.03977
5094320000000	-9778720000000	0.02389
5092590000000	-9801120000000	0.00988
5090860000000	-9823520000000	0.0468
5089130000000	-9845920000000	0.03692
5087400000000	-9868320000000	0.03987
5085670000000	-9890720000000	0.03232
5083940000000	-9913120000000	0.06247
5082210000000	-9935520000000	0.03284
5341550000000	-45764400000	0.01231
5339820000000	-68164400000	0.09825
5338100000000	-90564400000	0.17302
5336370000000	-112964000000	0.26238
5334640000000	-135364000000	0.33772
5332910000000	-157764000000	0.40303
5331180000000	-180164000000	0.50495
5329450000000	-202564000000	0.56814
5327720000000	-224964000000	0.63749
5325990000000	-247364000000	0.69892
5324260000000	-269764000000	0.76718
5322530000000	-292164000000	0.82013
5320810000000	-314564000000	0.83223
5319080000000	-336964000000	0.86403
5317350000000	-359364000000	0.8918
5315620000000	-381764000000	0.8994
5313890000000	-404164000000	0.88493
5312160000000	-426564000000	0.87794
5310430000000	-448964000000	0.84718
5308700000000	-471364000000	0.83451
5306970000000	-493764000000	0.80291
5305250000000	-516164000000	0.77442
5303520000000	-538564000000	0.73957
5301790000000	-560964000000	0.73383
5300060000000	-583364000000	0.70601
5298330000000	-605764000000	0.65383
5296600000000	-628164000000	0.6349
5294870000000	-650564000000	0.62461
5293140000000	-672964000000	0.58831
5291410000000	-695364000000	0.58242
5289680000000	-717764000000	0.55532
5287960000000	-740164000000	0.55031
5286230000000	-762564000000	0.52528
5284500000000	-784964000000	0.50118
5282770000000	-807364000000	0.48044
5281040000000	-829764000000	0.48846
5279310000000	-852164000000	0.46157
5277580000000	-874564000000	0.46074
5275850000000	-896964000000	0.43489
5274120000000	-919364000000	0.42284
5272400000000	-941764000000	0.41053
5270670000000	-964164000000	0.40924
5268940000000	-986564000000	0.38773
5267210000000	-1008960000000	0.38007
5265480000000	-1031360000000	0.37697
5263750000000	-1053760000000	0.3672
5262020000000	-1076160000000	0.36834
5260290000000	-1098560000000	0.35055
5258560000000	-1120960000000	0.34103
5256840000000	-1143360000000	0.33545
5255110000000	-1165760000000	0.34398
5253380000000	-1188160000000	0.32671
5251650000000	-1210560000000	0.32624
5249920000000	-1232960000000	0.30178
5248190000000	-1255360000000	0.30277
5246460000000	-1277760000000	0.28767
5244730000000	-1300160000000	0.30065
5243000000000	-1322560000000	0.29377
5241270000000	-1344960000000	0.28834
5239550000000	-1367360000000	0.27009
5237820000000	-1389760000000	0.25488
5236090000000	-1412160000000	0.25778
5234360000000	-1434560000000	0.26264
5232630000000	-1456960000000	0.24635
5230900000000	-1479360000000	0.26978
5229170000000	-1501760000000	0.26569
5227440000000	-1524160000000	0.25059
5225710000000	-1546560000000	0.24227
5223990000000	-1568960000000	0.23642
5222260000000	-1591360000000	0.2388
5220530000000	-1613760000000	0.22655
5218800000000	-1636160000000	0.23978
5217070000000	-1658560000000	0.23968
5215340000000	-1680960000000	0.21481
5213610000000	-1703360000000	0.22613
5211880000000	-1725760000000	0.21739
5210150000000	-1748160000000	0.20483
5208420000000	-1770560000000	0.19035
5206700000000	-1792960000000	0.1979
5204970000000	-1815360000000	0.20095
5203240000000	-1837760000000	0.20462
5201510000000	-1860160000000	0.1874
5199780000000	-1882560000000	0.19283
5198050000000	-1904960000000	0.20369
5196320000000	-1927360000000	0.19159
5194590000000	-1949760000000	0.18802
5192860000000	-1972160000000	0.17458
5191140000000	-1994560000000	0.17473
5189410000000	-2016960000000	0.18833
5187680000000	-2039360000000	0.17706
5185950000000	-2061760000000	0.16971
5184220000000	-2084160000000	0.16982
5182490000000	-2106560000000	0.17608
5180760000000	-2128960000000	0.16491
5179030000000	-2151360000000	0.16418
5177300000000	-2173760000000	0.17633
5175580000000	-2196160000000	0.16946
5173850000000	-2218560000000	0.17344
5172120000000	-2240960000000	0.15213
5170390000000	-2263360000000	0.14572
5168660000000	-2285760000000	0.15301
5166930000000	-2308160000000	0.14479
5165200000000	-2330560000000	0.16341
5163470000000	-2352960000000	0.16434
5161740000000	-2375360000000	0.13703
5160010000000	-2397760000000	0.15058
5158290000000	-2420160000000	0.15632
5156560000000	-2442560000000	0.1451
5154830000000	-2464960000000	0.13678
5153100000000	-2487360000000	0.15141
5151370000000	-2509760000000	0.1452
5149640000000	-2532160000000	0.14505
5147910000000	-2554560000000	0.13967
5146180000000	-2576960000000	0.14324
5144450000000	-2599360000000	0.14386
5142730000000	-2621760000000	0.1344
5141000000000	-2644160000000	0.1088
5139270000000	-2666560000000	0.118
5137540000000	-2688960000000	0.14308
5135810000000	-2711360000000	0.1359
5134080000000	-2733760000000	0.14034
5132350000000	-2756160000000	0.12633
5130620000000	-2778560000000	0.12033
5128890000000	-2800960000000	0.13202
5127160000000	-2823360000000	0.11263
5125440000000	-2845760000000	0.11035
5123710000000	-2868160000000	0.11733
5121980000000	-2890560000000	0.11935
5120250000000	-2912960000000	0.11681
5118520000000	-2935360000000	0.12473
5116790000000	-2957760000000	0.10559
5115060000000	-2980160000000	0.10937
5113330000000	-3002560000000	0.11868
5111600000000	-3024960000000	0.11671
5109880000000	-3047360000000	0.10802
5108150000000	-3069760000000	0.10642
5106420000000	-3092160000000	0.07012
5104690000000	-3114560000000	0.09137
5102960000000	-3136960000000	0.11257
5101230000000	-3159360000000	0.10265
5099500000000	-3181760000000	0.10746
5097770000000	-3204160000000	0.10223
5096040000000	-3226560000000	0.10616
5094320000000	-3248960000000	0.11351
5092590000000	-3271360000000	0.12214
5090860000000	-3293760000000	0.08812
5089130000000	-3316160000000	0.0937
5087400000000	-3338560000000	0.08713
5085670000000	-3360960000000	0.0846
5083940000000	-3383360000000	0.10358
5082210000000	-3405760000000	0.09137
5080480000000	-3428160000000	0.07421
5078750000000	-3450560000000	0.08744
5077030000000	-3472960000000	0.08744
5075300000000	-3495360000000	0.10223
5073570000000	-3517760000000	0.09711
5071840000000	-3540160000000	0.09706
5070110000000	-3562560000000	0.08874
5068380000000	-3584960000000	0.09939
5066650000000	-3607360000000	0.09256
5064920000000	-3629760000000	0.10926
5063190000000	-3652160000000	0.09908
5061470000000	-3674560000000	0.08941
5059740000000	-3696960000000	0.08755
5058010000000	-3719360000000	0.07798
5056280000000	-3741760000000	0.07989
5054550000000	-3764160000000	0.08274
5052820000000	-3786560000000	0.06898
5051090000000	-3808960000000	0.07896
5049360000000	-3831360000000	0.07948
5047630000000	-3853760000000	0.07633
5045900000000	-3876160000000	0.08884
5044180000000	-3898560000000	0.06934
5042450000000	-3920960000000	0.05719
5040720000000	-3943360000000	0.05988
5038990000000	-3965760000000	0.07881
5037260000000	-3988160000000	0.09075
5035530000000	-4010560000000	0.07648
5033800000000	-4032960000000	0.08103
5032070000000	-4055360000000	0.06712
5030340000000	-4077760000000	0.05864
5028620000000	-4100160000000	0.08579
5026890000000	-4122560000000	0.07782
5025160000000	-4144960000000	0.04437
5023430000000	-4167360000000	0.05466
5021700000000	-4189760000000	0.0588
5019970000000	-4212160000000	0.04757
5018240000000	-4234560000000	0.065
5016510000000	-4256960000000	0.05497
5014780000000	-4279360000000	0.0741
5013050000000	-4301760000000	0.06521
5011330000000	-4324160000000	0.04907
5009600000000	-4346560000000	0.04949
5007870000000	-4368960000000	0.04359
5006140000000	-4391360000000	0.07808
5004410000000	-4413760000000	0.0771
5002680000000	-4436160000000	0.04954
5000950000000	-4458560000000	0.07565
4999220000000	-4480960000000	0.08031
4997490000000	-4503360000000	0.0212
4995770000000	-4525760000000	0.04607
4994040000000	-4548160000000	0.04204
4992310000000	-4570560000000	0.06159
4990580000000	-4592960000000	0.05254
4988850000000	-4615360000000	0.04876
4987120000000	-4637760000000	0.03961
4985390000000	-4660160000000	0.05373
4983660000000	-4682560000000	0.06976
4981930000000	-4704960000000	0.05978
4980210000000	-4727360000000	0.04261
4978480000000	-4749760000000	5.17108e-05
4976750000000	-4772160000000	0.08868
4975020000000	-4794560000000	0.04669
4973290000000	-4816960000000	0.05528
4971560000000	-4839360000000	0.03506
4969830000000	-4861760000000	0.065
4968100000000	-4884160000000	0.0302
4966370000000	-4906560000000	0.05254
4964640000000	-4928960000000	-0.01184
4962920000000	-4951360000000	0.02761
4961190000000	-4973760000000	0.07307
4959460000000	-4996160000000	0.03832
4957730000000	-5018560000000	0.10746
4956000000000	-5040960000000	0.03423
4954270000000	-5063360000000	0.03821
4952540000000	-5085760000000	0.04447
4950810000000	-5108160000000	0.01163
4949080000000	-5130560000000	0.04385
4947360000000	-5152960000000	0.03977
4945630000000	-5175360000000	-0.00403
4943900000000	-5197760000000	0.05052
4942170000000	-5220160000000	0.0439
4940440000000	-5242560000000	0.06035
4938710000000	-5264960000000	0.04644
4936980000000	-5287360000000	-0.01293
4935250000000	-5309760000000	0.03372
4933520000000	-5332160000000	0.03092
4931790000000	-5354560000000	0.02327
4930070000000	-5376960000000	0.12685
4928340000000	-5399360000000	0.03553
4926610000000	-5421760000000	0.04478
4924880000000	-5444160000000	0.08682
4923150000000	-5466560000000	0.06872
4921420000000	-5488960000000	0.0619
4919690000000	-5511360000000	0.09851
4917960000000	-5533760000000	0.04033
4916230000000	-5556160000000	0.07358
4914510000000	-5578560000000	0.08
4912780000000	-5600960000000	0.04018
4911050000000	-5623360000000	0.08207
4909320000000	-5645760000000	-0.00579
4907590000000	-5668160000000	0.02467
4905860000000	-5690560000000	0.06976
4904130000000	-5712960000000	0.03315
4902400000000	-5735360000000	0.06996
4900670000000	-5757760000000	0.09396
4898950000000	-5780160000000	0.07446
4897220000000	-5802560000000	0.07514
4895490000000	-5824960000000	0.0393
4893760000000	-5847360000000	0.04628
4892030000000	-5869760000000	0.07234
4890300000000	-5892160000000	0.09055
4888570000000	-5914560000000	0.05761
4886840000000	-5936960000000	0.09334
4885110000000	-5959360000000	0.03382
4883380000000	-5981760000000	0.08987
4881660000000	-6004160000000	0.06459
4879930000000	-6026560000000	0.0771
4878200000000	-6048960000000	0.07188
4876470000000	-6071360000000	0.06707
4874740000000	-6093760000000	0.07136
4873010000000	-6116160000000	0.05678
4871280000000	-6138560000000	0.0816
4869550000000	-6160960000000	0.06929
4867820000000	-6183360000000	0.08486
4866100000000	-6205760000000	0.07576
4864370000000	-6228160000000	0.0771
4862640000000	-6250560000000	0.05419
4860910000000	-6272960000000	0.0378
4859180000000	-6295360000000	0.04788
4857450000000	-6317760000000	0.06541
4855720000000	-6340160000000	0.05404
4853990000000	-6362560000000	0.06241
4852260000000	-6384960000000	0.07591
4850530000000	-6407360000000	0.06671
4848810000000	-6429760000000	0.0756
4847080000000	-6452160000000	0.06009
4845350000000	-6474560000000	0.07017
4843620000000	-6496960000000	0.04535
4841890000000	-6519360000000	0.06086
4840160000000	-6541760000000	0.062
4838430000000	-6564160000000	0.06676
4836700000000	-6586560000000	0.05109
4834970000000	-6608960000000	0.04406
4833250000000	-6631360000000	0.07146
4831520000000	-6653760000000	0.04669
4829790000000	-6676160000000	0.05114
4828060000000	-6698560000000	0.03542
4826330000000	-6720960000000	0.06154
4824600000000	-6743360000000	0.07483
4822870000000	-6765760000000	0.01934
4821140000000	-6788160000000	0.03677
4819410000000	-6810560000000	0.06867
4817680000000	-6832960000000	0.06262
4815960000000	-6855360000000	0.05507
4814230000000	-6877760000000	0.04142
4812500000000	-6900160000000	0.04163
4810770000000	-6922560000000	0.07876
4809040000000	-6944960000000	0.04959
4807310000000	-6967360000000	0.04742
4805580000000	-6989760000000	0.06288
4803850000000	-7012160000000	0.03284
4802120000000	-7034560000000	0.05228
4800400000000	-7056960000000	0.03351
4798670000000	-7079360000000	0.04163
4796940000000	-7101760000000	0.04799
4795210000000	-7124160000000	0.05802
4793480000000	-7146560000000	0.05187
4791750000000	-7168960000000	0.05171
4790020000000	-7191360000000	0.05688
4788290000000	-7213760000000	0.04571
4786560000000	-7236160000000	0.06376
4784840000000	-7258560000000	0.03992
4783110000000	-7280960000000	0.04432
4781380000000	-7303360000000	0.03708
4779650000000	-7325760000000	0.0452
4777920000000	-7348160000000	0.03284
4776190000000	-7370560000000	0.03987
4774460000000	-7392960000000	0.053
4772730000000	-7415360000000	0.03403
4771000000000	-7437760000000	0.03775
4769270000000	-7460160000000	0.04504
4767550000000	-7482560000000	0.04318
4765820000000	-7504960000000	0.0483
4764090000000	-7527360000000	0.04121
4762360000000	-7549760000000	0.05337
4760630000000	-7572160000000	0.05424
4758900000000	-7594560000000	0.05104
4757170000000	-7616960000000	0.04333
4755440000000	-7639360000000	0.04494
4753710000000	-7661760000000	0.03097
4751990000000	-7684160000000	0.05848
4750260000000	-7706560000000	0.04008
4748530000000	-7728960000000	0.05337
4746800000000	-7751360000000	0.0362
4745070000000	-7773760000000	0.06759
4743340000000	-7796160000000	0.05502
4741610000000	-7818560000000	0.03651
4739880000000	-7840960000000	0.03987
4738150000000	-7863360000000	0.05533
4736420000000	-7885760000000	0.05269
4734700000000	-7908160000000	0.05817
4732970000000	-7930560000000	0.06541
4731240000000	-7952960000000	0.04861
4729510000000	-7975360000000	0.06009
4727780000000	-7997760000000	0.04023
4726050000000	-8020160000000	0.02994
4724320000000	-8042560000000	0.04835
4722590000000	-8064960000000	0.04566
4720860000000	-8087360000000	0.04721
4719140000000	-8109760000000	0.04008
4717410000000	-8132160000000	0.03837
4715680000000	-8154560000000	0.03651
4713950000000	-8176960000000	0.05233
4712220000000	-8199360000000	0.03341
4710490000000	-8221760000000	0.06283
4708760000000	-8244160000000	0.02074
4707030000000	-8266560000000	0.03201
4705300000000	-8288960000000	0.05797
4703580000000	-8311360000000	0.02782
4701850000000	-8333760000000	0.03227
4700120000000	-8356160000000	0.04318
4698390000000	-8378560000000	0.07053
4696660000000	-8400960000000	0.05543
4694930000000	-8423360000000	0.05921
4693200000000	-8445760000000	0.01887
4691470000000	-8468160000000	0.02436
4689740000000	-8490560000000	0.05026
4688010000000	-8512960000000	0.04633
4686290000000	-8535360000000	0.0528
4684560000000	-8557760000000	0.05052
4682830000000	-8580160000000	0.03444
4681100000000	-8602560000000	0.04225
4679370000000	-8624960000000	0.04468
4677640000000	-8647360000000	0.06278
4675910000000	-8669760000000	0.05605
4674180000000	-8692160000000	0.03051
4672450000000	-8714560000000	0.04607
4670730000000	-8736960000000	0.06655
4669000000000	-8759360000000	0.05455
4667270000000	-8781760000000	0.04633
4665540000000	-8804160000000	0.00905
4663810000000	-8826560000000	0.02746
4662080000000	-8848960000000	0.04607
4660350000000	-8871360000000	0.0256
4658620000000	-8893760000000	0.0543
4656890000000	-8916160000000	0.03299
4655160000000	-8938560000000	0.04132
4653440000000	-8960960000000	0.03309
4651710000000	-8983360000000	0.03806
4649980000000	-9005760000000	0.03671
4648250000000	-9028160000000	0.03713
4646520000000	-9050560000000	0.02808
4644790000000	-9072960000000	0.03558
4643060000000	-9095360000000	0.0347
4641330000000	-9117760000000	0.02689
4639600000000	-9140160000000	0.02405
4637880000000	-9162560000000	0.04944
4636150000000	-9184960000000	0.04654
4634420000000	-9207360000000	0.03749
4632690000000	-9229760000000	0.03997
4630960000000	-9252160000000	0.03449
4629230000000	-9274560000000	0.04773
4627500000000	-9296960000000	0.0364
4625770000000	-9319360000000	0.02492
4624040000000	-9341760000000	0.05518
4622320000000	-9364160000000	0.03134
4620590000000	-9386560000000	0.04483
4618860000000	-9408960000000	0.03977
4617130000000	-9431360000000	0.04209
4615400000000	-9453760000000	0.02265
4613670000000	-9476160000000	0.02637
4611940000000	-9498560000000	0.0454
4610210000000	-9520960000000	0.03842
4869550000000	368795000000	-0.98499
4867820000000	346395000000	-0.96746
4866100000000	323995000000	-0.97981
4864370000000	301595000000	-0.95629
4862640000000	279195000000	-0.9537
4860910000000	256795000000	-0.95391
4859180000000	234395000000	-0.93772
4857450000000	211995000000	-0.89516
4855720000000	189595000000	-0.8586
4853990000000	167195000000	-0.80689
4852260000000	144795000000	-0.75782
4850530000000	122395000000	-0.68806
4848810000000	99995100000	-0.61479
4847080000000	77595100000	-0.53474
4845350000000	55195100000	-0.44792
4843620000000	32795100000	-0.35318
4841890000000	10395100000	-0.24594
4840160000000	-12004900000	-0.13874
4838430000000	-34404900000	-0.01169
4836700000000	-56804900000	0.09179
4834970000000	-79204900000	0.19676
4833250000000	-101605000000	0.29646
4831520000000	-124005000000	0.40448
4829790000000	-146405000000	0.48251
4828060000000	-168805000000	0.57771
4826330000000	-191205000000	0.67715
4824600000000	-213605000000	0.73496
4822870000000	-236005000000	0.7981
4821140000000	-258405000000	0.86895
4819410000000	-280805000000	0.89878
4817680000000	-303205000000	0.94584
4815960000000	-325605000000	0.94574
4814230000000	-348005000000	0.96342
4812500000000	-370405000000	0.95649
4810770000000	-392805000000	0.94506
4809040000000	-415205000000	0.92697
4807310000000	-437605000000	0.89708
4805580000000	-460005000000	0.86719
4803850000000	-482405000000	0.83632
4802120000000	-504805000000	0.79624
4800400000000	-527205000000	0.78554
4798670000000	-549605000000	0.72907
4796940000000	-572005000000	0.70347
4795210000000	-594405000000	0.69644
4793480000000	-616805000000	0.68005
4791750000000	-639205000000	0.64742
4790020000000	-661605000000	0.6151
4788290000000	-684005000000	0.61412
4786560000000	-706405000000	0.5925
4784840000000	-728805000000	0.56856
4783110000000	-751205000000	0.54984
4781380000000	-773605000000	0.55005
4779650000000	-796005000000	0.51871
4777920000000	-818405000000	0.51271
4776190000000	-840805000000	0.49172
4774460000000	-863205000000	0.48608
4772730000000	-885605000000	0.47202
4771000000000	-908005000000	0.46116
4769270000000	-930405000000	0.43654
4767550000000	-952805000000	0.43711
4765820000000	-975205000000	0.44135
4764090000000	-997605000000	0.41022
4762360000000	-1020000000000	0.40536
4760630000000	-1042400000000	0.39559
4758900000000	-1064800000000	0.39579
4757170000000	-1087200000000	0.37904
4755440000000	-1109600000000	0.37485
4753710000000	-1132000000000	0.37149
4751990000000	-1154400000000	0.35851
4750260000000	-1176800000000	0.35624
4748530000000	-1199200000000	0.35215
4746800000000	-1221600000000	0.3432
4745070000000	-1244000000000	0.33958
4743340000000	-1266400000000	0.3203
4741610000000	-1288800000000	0.32707
4739880000000	-1311200000000	0.32707
4738150000000	-1333600000000	0.3234
4736420000000	-1356000000000	0.29941
4734700000000	-1378400000000	0.31011
4732970000000	-1400800000000	0.31414
4731240000000	-1423200000000	0.29211
4729510000000	-1445600000000	0.28715
4727780000000	-1468000000000	0.28513
4726050000000	-1490400000000	0.27427
4724320000000	-1512800000000	0.27722
4722590000000	-1535200000000	0.29703
4720860000000	-1557600000000	0.26766
4719140000000	-1580000000000	0.28358
4717410000000	-1602400000000	0.26378
4715680000000	-1624800000000	0.25602
4713950000000	-1647200000000	0.24981
4712220000000	-1669600000000	0.26254
4710490000000	-1692000000000	0.24175
4708760000000	-1714400000000	0.24635
4707030000000	-1736800000000	0.23254
4705300000000	-1759200000000	0.22396
4703580000000	-1781600000000	0.24547
4701850000000	-1804000000000	0.20643
4700120000000	-1826400000000	0.22215
4698390000000	-1848800000000	0.22505
4696660000000	-1871200000000	0.22499
4694930000000	-1893600000000	0.22711
4693200000000	-1916000000000	0.22608
4691470000000	-1938400000000	0.21248
4689740000000	-1960800000000	0.2328
4688010000000	-1983200000000	0.22954
4686290000000	-2005600000000	0.20674
4684560000000	-2028000000000	0.2266
4682830000000	-2050400000000	0.20193
4681100000000	-2072800000000	0.19991
4679370000000	-2095200000000	0.20627
4677640000000	-2117600000000	0.20038
4675910000000	-2140000000000	0.20095
4674180000000	-2162400000000	0.207
4672450000000	-2184800000000	0.20131
4670730000000	-2207200000000	0.1979
4669000000000	-2229600000000	0.19355
4667270000000	-2252000000000	0.18331
4665540000000	-2274400000000	0.17876
4663810000000	-2296800000000	0.18373
4662080000000	-2319200000000	0.19014
4660350000000	-2341600000000	0.17851
4658620000000	-2364000000000	0.17142
4656890000000	-2386400000000	0.15508
4655160000000	-2408800000000	0.18683
4653440000000	-2431200000000	0.16072
4651710000000	-2453600000000	0.16625
4649980000000	-2476000000000	0.18476
4648250000000	-2498400000000	0.14743
4646520000000	-2520800000000	0.17396
4644790000000	-2543200000000	0.18099
4643060000000	-2565600000000	0.15813
4641330000000	-2588000000000	0.16129
4639600000000	-2610400000000	0.16279
4637880000000	-2632800000000	0.15565
4636150000000	-2655200000000	0.16889
4634420000000	-2677600000000	0.15611
4632690000000	-2700000000000	0.14794
4630960000000	-2722400000000	0.1344
4629230000000	-2744800000000	0.16206
4627500000000	-2767200000000	0.15839
4625770000000	-2789600000000	0.13109
4624040000000	-2812000000000	0.14138
4622320000000	-2834400000000	0.13083
4620590000000	-2856800000000	0.13331
4618860000000	-2879200000000	0.13533
4617130000000	-2901600000000	0.17509
4615400000000	-2924000000000	0.14102
4613670000000	-2946400000000	0.13972
4611940000000	-2968800000000	0.14582
4610210000000	-2991200000000	0.13765
4608480000000	-3013600000000	0.13688
4606750000000	-3036000000000	0.13078
4605030000000	-3058400000000	0.14174
4603300000000	-3080800000000	0.11899
4601570000000	-3103200000000	0.14505
4599840000000	-3125600000000	0.13703
4598110000000	-3148000000000	0.11201
4596380000000	-3170400000000	0.10446
4594650000000	-3192800000000	0.11418
4592920000000	-3215200000000	0.11914
4591190000000	-3237600000000	0.12871
4589470000000	-3260000000000	0.11754
4587740000000	-3282400000000	0.12592
4586010000000	-3304800000000	0.11516
4584280000000	-3327200000000	0.09639
4582550000000	-3349600000000	0.10451
4580820000000	-3372000000000	0.10192
4579090000000	-3394400000000	0.12711
4577360000000	-3416800000000	0.10146
4575630000000	-3439200000000	0.10115
4573900000000	-3461600000000	0.1118
4572180000000	-3484000000000	0.11723
4570450000000	-3506400000000	0.09582
4568720000000	-3528800000000	0.10782
4566990000000	-3551200000000	0.09504
4565260000000	-3573600000000	0.08377
4563530000000	-3596000000000	0.11309
4561800000000	-3618400000000	0.09872
4560070000000	-3640800000000	0.09463
4558340000000	-3663200000000	0.08589
4556620000000	-3685600000000	0.08491
4554890000000	-3708000000000	0.07452
4553160000000	-3730400000000	0.09598
4551430000000	-3752800000000	0.10384
4549700000000	-3775200000000	0.07808
4547970000000	-3797600000000	0.08868
4546240000000	-3820000000000	0.07245
4544510000000	-3842400000000	0.0862
4542780000000	-3864800000000	0.08936
4541050000000	-3887200000000	0.10053
4539330000000	-3909600000000	0.08796
4537600000000	-3932000000000	0.06847
4535870000000	-3954400000000	0.09024
4534140000000	-3976800000000	0.08703
4532410000000	-3999200000000	0.0966
4530680000000	-4021600000000	0.08398
4528950000000	-4044000000000	0.09727
4527220000000	-4066400000000	0.04235
4525490000000	-4088800000000	0.0636
4523770000000	-4111200000000	0.04499
4522040000000	-4133600000000	0.0694
4520310000000	-4156000000000	0.07493
4518580000000	-4178400000000	0.07664
4516850000000	-4200800000000	0.06691
4515120000000	-4223200000000	0.07389
4513390000000	-4245600000000	0.06578
4511660000000	-4268000000000	0.07617
4509930000000	-4290400000000	0.0515
4508210000000	-4312800000000	0.07545
4506480000000	-4335200000000	0.04768
4504750000000	-4357600000000	0.06107
4503020000000	-4380000000000	0.04907
4501290000000	-4402400000000	0.07855
4499560000000	-4424800000000	0.03723
4497830000000	-4447200000000	0.04819
4496100000000	-4469600000000	0.05466
4494370000000	-4492000000000	0.04209
4492640000000	-4514400000000	0.08874
4490920000000	-4536800000000	0.05078
4489190000000	-4559200000000	0.05786
4487460000000	-4581600000000	0.11738
4485730000000	-4604000000000	0.05631
4484000000000	-4626400000000	0.0273
4482270000000	-4648800000000	0.05026
4480540000000	-4671200000000	0.06919
4478810000000	-4693600000000	0.0982
4477080000000	-4716000000000	0.04039
4475360000000	-4738400000000	-0.00517
4473630000000	-4760800000000	0.08341
4471900000000	-4783200000000	0.06278
4470170000000	-4805600000000	0.02746
4468440000000	-4828000000000	0.06066
4466710000000	-4850400000000	0.03749
4464980000000	-4872800000000	0.06381
4463250000000	-4895200000000	0.07121
4461520000000	-4917600000000	0.07731
4459790000000	-4940000000000	0.08827
4458070000000	-4962400000000	0.07472
4456340000000	-4984800000000	0.08584
4454610000000	-5007200000000	0.07296
4452880000000	-5029600000000	0.09432
4451150000000	-5052000000000	0.05714
4449420000000	-5074400000000	0.05549
4447690000000	-5096800000000	0.03837
4445960000000	-5119200000000	0.06888
4444230000000	-5141600000000	0.07658
4442510000000	-5164000000000	0.06422
4440780000000	-5186400000000	0.10911
4439050000000	-5208800000000	0.08331
4437320000000	-5231200000000	0.05931
4435590000000	-5253600000000	0.04545
4433860000000	-5276000000000	0.08956
4432130000000	-5298400000000	0.05636
4430400000000	-5320800000000	0.09866
4428670000000	-5343200000000	0.07994
4426950000000	-5365600000000	0.07617
4425220000000	-5388000000000	0.07152
4423490000000	-5410400000000	0.06903
4421760000000	-5432800000000	0.06795
4420030000000	-5455200000000	0.05047
4418300000000	-5477600000000	0.05497
4416570000000	-5500000000000	0.07534
4414840000000	-5522400000000	0.07028
4413110000000	-5544800000000	0.05719
4411380000000	-5567200000000	0.06536
4409660000000	-5589600000000	0.06366
4407930000000	-5612000000000	0.09701
4406200000000	-5634400000000	0.04861
4404470000000	-5656800000000	0.08517
4402740000000	-5679200000000	0.07633
4401010000000	-5701600000000	0.06893
4399280000000	-5724000000000	0.06547
4397550000000	-5746400000000	0.05828
4395820000000	-5768800000000	0.07126
4394100000000	-5791200000000	0.04245
4392370000000	-5813600000000	0.05466
4390640000000	-5836000000000	0.06629
4388910000000	-5858400000000	0.05487
4387180000000	-5880800000000	0.04933
4385450000000	-5903200000000	0.05347
4383720000000	-5925600000000	0.08424
4381990000000	-5948000000000	0.04861
4380260000000	-5970400000000	0.07767
4378530000000	-5992800000000	0.07146
4376810000000	-6015200000000	0.05616
4375080000000	-6037600000000	0.04923
4373350000000	-6060000000000	0.06552
4371620000000	-6082400000000	0.06112
4369890000000	-6104800000000	0.06872
4368160000000	-6127200000000	0.04483
4366430000000	-6149600000000	0.04644
4364700000000	-6172000000000	0.08548
4362970000000	-6194400000000	0.03372
4361250000000	-6216800000000	0.071
4359520000000	-6239200000000	0.06738
4357790000000	-6261600000000	0.07157
4356060000000	-6284000000000	0.07281
4354330000000	-6306400000000	0.07932
4352600000000	-6328800000000	0.04747
4350870000000	-6351200000000	0.09406
4349140000000	-6373600000000	0.07364
4347410000000	-6396000000000	0.05735
4345680000000	-6418400000000	0.05026
4343960000000	-6440800000000	0.06996
4342230000000	-6463200000000	0.06552
4340500000000	-6485600000000	0.05404
4338770000000	-6508000000000	0.05026
4337040000000	-6530400000000	0.05595
4335310000000	-6552800000000	0.07327
4333580000000	-6575200000000	0.05497
4331850000000	-6597600000000	0.06645
4330120000000	-6620000000000	0.05533
4328400000000	-6642400000000	0.05337
4326670000000	-6664800000000	0.06154
4324940000000	-6687200000000	0.0515
4323210000000	-6709600000000	0.06004
4321480000000	-6732000000000	0.05181
4319750000000	-6754400000000	0.05543
4318020000000	-6776800000000	0.06759
4316290000000	-6799200000000	0.06298
4314560000000	-6821600000000	0.06221
4312840000000	-6844000000000	0.0348
4311110000000	-6866400000000	0.04473
4309380000000	-6888800000000	0.07312
4307650000000	-6911200000000	0.06391
4305920000000	-6933600000000	0.06598
4304190000000	-6956000000000	0.06324
4302460000000	-6978400000000	0.0724
4300730000000	-7000800000000	0.05207
4299000000000	-7023200000000	0.04494
4297270000000	-7045600000000	0.06205
4295550000000	-7068000000000	0.06076
4293820000000	-7090400000000	0.05326
4292090000000	-7112800000000	0.05843
4290360000000	-7135200000000	0.07441
4288630000000	-7157600000000	0.07607
4286900000000	-7180000000000	0.05533
4285170000000	-7202400000000	0.05605
4283440000000	-7224800000000	0.04085
4281710000000	-7247200000000	0.05187
4279990000000	-7269600000000	0.05993
4278260000000	-7292000000000	0.05254
4276530000000	-7314400000000	0.03899
4274800000000	-7336800000000	0.05518
4273070000000	-7359200000000	0.07038
4271340000000	-7381600000000	0.05047
4269610000000	-7404000000000	0.05978
4267880000000	-7426400000000	0.05492
4266150000000	-7448800000000	0.04194
4264420000000	-7471200000000	0.05264
4262700000000	-7493600000000	0.04287
4260970000000	-7516000000000	0.0588
4259240000000	-7538400000000	0.065
4257510000000	-7560800000000	0.0545
4255780000000	-7583200000000	0.05368
4254050000000	-7605600000000	0.04504
4252320000000	-7628000000000	0.04406
4250590000000	-7650400000000	0.04861
4248860000000	-7672800000000	0.05399
4247140000000	-7695200000000	0.05011
4245410000000	-7717600000000	0.05326
4243680000000	-7740000000000	0.05424
4241950000000	-7762400000000	0.05202
4240220000000	-7784800000000	0.03423
4238490000000	-7807200000000	0.04364
4236760000000	-7829600000000	0.05
4235030000000	-7852000000000	0.04323
4233300000000	-7874400000000	0.04819
4231580000000	-7896800000000	0.05037
4229850000000	-7919200000000	0.06567
4228120000000	-7941600000000	0.06019
4226390000000	-7964000000000	0.08393
4224660000000	-7986400000000	0.05533
4222930000000	-8008800000000	0.02415
4221200000000	-8031200000000	0.05781
4219470000000	-8053600000000	0.05828
4217740000000	-8076000000000	0.04644
4216010000000	-8098400000000	0.05399
4214290000000	-8120800000000	0.03547
4212560000000	-8143200000000	0.03129
4210830000000	-8165600000000	0.05611
4209100000000	-8188000000000	0.06045
4207370000000	-8210400000000	0.04582
4205640000000	-8232800000000	0.04199
4203910000000	-8255200000000	0.04328
4202180000000	-8277600000000	0.03097
4200450000000	-8300000000000	0.07136
4198730000000	-8322400000000	0.04132
4197000000000	-8344800000000	0.04902
4195270000000	-8367200000000	0.04732
4193540000000	-8389600000000	0.05471
4191810000000	-8412000000000	0.05145
4190080000000	-8434400000000	0.04359
4188350000000	-8456800000000	0.07064
4186620000000	-8479200000000	0.04339
4184890000000	-8501600000000	0.03584
4183160000000	-8524000000000	0.04049
4181440000000	-8546400000000	0.04669
4179710000000	-8568800000000	0.06024
4177980000000	-8591200000000	0.04654
4176250000000	-8613600000000	0.0468
4174520000000	-8636000000000	0.05099
4172790000000	-8658400000000	0.04804
4171060000000	-8680800000000	0.02885
4169330000000	-8703200000000	0.02989
4167600000000	-8725600000000	0.05073
4165880000000	-8748000000000	0.03956
4164150000000	-8770400000000	0.05476
4162420000000	-8792800000000	0.04504
4160690000000	-8815200000000	0.04938
4158960000000	-8837600000000	0.0379
4157230000000	-8860000000000	0.04447
4155500000000	-8882400000000	0.04018
4153770000000	-8904800000000	0.0377
4152040000000	-8927200000000	0.0424
4150320000000	-8949600000000	0.0498
4148590000000	-8972000000000	0.04902
4146860000000	-8994400000000	0.03082
4145130000000	-9016800000000	0.03165
4143400000000	-9039200000000	0.05114
4141670000000	-9061600000000	0.03413
4139940000000	-9084000000000	0.0408
4138210000000	-9106400000000	0.04856
4397550000000	783355000000	-0.85152
4395820000000	760955000000	-0.85374
4394100000000	738555000000	-0.88244
4392370000000	716155000000	-0.88648
4390640000000	693755000000	-0.90768
4388910000000	671355000000	-0.92443
4387180000000	648955000000	-0.95639
4385450000000	626555000000	-0.96244
4383720000000	604155000000	-0.97371
4381990000000	581755000000	-0.99512
4380260000000	559355000000	-1.02015
4378530000000	536955000000	-1.02475
4376810000000	514555000000	-1.04088
4375080000000	492155000000	-1.05004
4373350000000	469755000000	-1.07765
4371620000000	447355000000	-1.0836
4369890000000	424955000000	-1.0972
4368160000000	402555000000	-1.09016
4366430000000	380155000000	-1.09642
4364700000000	357755000000	-1.09234
4362970000000	335355000000	-1.08277
4361250000000	312955000000	-1.06328
4359520000000	290555000000	-1.05578
4357790000000	268155000000	-1.02304
4356060000000	245755000000	-1.00029
4354330000000	223355000000	-0.96797
4352600000000	200955000000	-0.90437
4350870000000	178555000000	-0.87743
4349140000000	156155000000	-0.81005
4347410000000	133755000000	-0.73584
4345680000000	111355000000	-0.66422
4343960000000	88954500000	-0.57016
4342230000000	66554500000	-0.44714
4340500000000	44154500000	-0.34993
4338770000000	21754500000	-0.21936
4337040000000	-645456000	-0.1012
4335310000000	-23045500000	0.02146
4333580000000	-45445500000	0.14003
4331850000000	-67845500000	0.25679
4330120000000	-90245500000	0.3629
4328400000000	-112645000000	0.47708
4326670000000	-135045000000	0.5667
4324940000000	-157445000000	0.66908
4323210000000	-179845000000	0.77178
4321480000000	-202245000000	0.8221
4319750000000	-224645000000	0.90587
4318020000000	-247045000000	0.95499
4316290000000	-269445000000	0.96761
4314560000000	-291845000000	1.01767
4312840000000	-314245000000	1.00748
4311110000000	-336645000000	0.99465
4309380000000	-359045000000	0.9976
4307650000000	-381445000000	0.97671
4305920000000	-403845000000	0.94005
4304190000000	-426245000000	0.92335
4302460000000	-448645000000	0.9022
4300730000000	-471045000000	0.87784
4299000000000	-493445000000	0.84459
4297270000000	-515845000000	0.81605
4295550000000	-538245000000	0.78817
4293820000000	-560645000000	0.77478
4292090000000	-583045000000	0.74153
4290360000000	-605445000000	0.72855
4288630000000	-627845000000	0.69928
4286900000000	-650245000000	0.67451
4285170000000	-672645000000	0.65057
4283440000000	-695045000000	0.64587
4281710000000	-717445000000	0.64023
4279990000000	-739845000000	0.59897
4278260000000	-762245000000	0.60134
4276530000000	-784645000000	0.58019
4274800000000	-807045000000	0.57823
4273070000000	-829445000000	0.57011
4271340000000	-851845000000	0.54477
4269610000000	-874245000000	0.51188
4267880000000	-896645000000	0.51525
4266150000000	-919045000000	0.50883
4264420000000	-941445000000	0.47698
4262700000000	-963845000000	0.48536
4260970000000	-986245000000	0.48013
4259240000000	-1008650000000	0.47501
4257510000000	-1031050000000	0.45536
4255780000000	-1053450000000	0.45619
4254050000000	-1075850000000	0.44849
4252320000000	-1098250000000	0.44275
4250590000000	-1120650000000	0.42465
4248860000000	-1143050000000	0.4217
4247140000000	-1165450000000	0.41762
4245410000000	-1187850000000	0.4263
4243680000000	-1210250000000	0.39652
4241950000000	-1232650000000	0.39569
4240220000000	-1255050000000	0.38778
4238490000000	-1277450000000	0.38509
4236760000000	-1299850000000	0.3674
4235030000000	-1322250000000	0.37294
4233300000000	-1344650000000	0.36384
4231580000000	-1367050000000	0.36482
4229850000000	-1389450000000	0.3505
4228120000000	-1411850000000	0.35432
4226390000000	-1434250000000	0.34486
4224660000000	-1456650000000	0.3475
4222930000000	-1479050000000	0.35256
4221200000000	-1501450000000	0.32831
4219470000000	-1523850000000	0.34114
4217740000000	-1546250000000	0.33953
4216010000000	-1568650000000	0.3113
4214290000000	-1591050000000	0.30711
4212560000000	-1613450000000	0.31363
4210830000000	-1635850000000	0.31419
4209100000000	-1658250000000	0.30809
4207370000000	-1680650000000	0.31388
4205640000000	-1703050000000	0.30871
4203910000000	-1725450000000	0.28343
4202180000000	-1747850000000	0.31673
4200450000000	-1770250000000	0.29387
4198730000000	-1792650000000	0.28043
4197000000000	-1815050000000	0.29113
4195270000000	-1837450000000	0.30039
4193540000000	-1859850000000	0.27324
4191810000000	-1882250000000	0.30985
4190080000000	-1904650000000	0.27417
4188350000000	-1927050000000	0.27634
4186620000000	-1949450000000	0.29082
4184890000000	-1971850000000	0.28053
4183160000000	-1994250000000	0.26243
4181440000000	-2016650000000	0.2615
4179710000000	-2039050000000	0.26419
4177980000000	-2061450000000	0.25974
4176250000000	-2083850000000	0.27112
4174520000000	-2106250000000	0.24221
4172790000000	-2128650000000	0.23663
4171060000000	-2151050000000	0.25225
4169330000000	-2173450000000	0.26631
4167600000000	-2195850000000	0.25705
4165880000000	-2218250000000	0.23378
4164150000000	-2240650000000	0.24826
4162420000000	-2263050000000	0.24919
4160690000000	-2285450000000	0.24713
4158960000000	-2307850000000	0.269
4157230000000	-2330250000000	0.23921
4155500000000	-2352650000000	0.24252
4153770000000	-2375050000000	0.23704
4152040000000	-2397450000000	0.25581
4150320000000	-2419850000000	0.22215
4148590000000	-2442250000000	0.20581
4146860000000	-2464650000000	0.2313
4145130000000	-2487050000000	0.20643
4143400000000	-2509450000000	0.22282
4141670000000	-2531850000000	0.22401
4139940000000	-2554250000000	0.22525
4138210000000	-2576650000000	0.21631
4136480000000	-2599050000000	0.20752
4134750000000	-2621450000000	0.18916
4133030000000	-2643850000000	0.2161
4131300000000	-2666250000000	0.21279
4129570000000	-2688650000000	0.19366
4127840000000	-2711050000000	0.17416
4126110000000	-2733450000000	0.21067
4124380000000	-2755850000000	0.1738
4122650000000	-2778250000000	0.19841
4120920000000	-2800650000000	0.18213
4119190000000	-2823050000000	0.16884
4117470000000	-2845450000000	0.18569
4115740000000	-2867850000000	0.17023
4114010000000	-2890250000000	0.15767
4112280000000	-2912650000000	0.1526
4110550000000	-2935050000000	0.16904
4108820000000	-2957450000000	0.13067
4107090000000	-2979850000000	0.18383
4105360000000	-3002250000000	0.16661
4103630000000	-3024650000000	0.15089
4101900000000	-3047050000000	0.16108
4100180000000	-3069450000000	0.17628
4098450000000	-3091850000000	0.13688
4096720000000	-3114250000000	0.1542
4094990000000	-3136650000000	0.14184
4093260000000	-3159050000000	0.11713
4091530000000	-3181450000000	0.14071
4089800000000	-3203850000000	0.12411
4088070000000	-3226250000000	0.14417
4086340000000	-3248650000000	0.12354
4084620000000	-3271050000000	0.09727
4082890000000	-3293450000000	0.12049
4081160000000	-3315850000000	0.11609
4079430000000	-3338250000000	0.10694
4077700000000	-3360650000000	0.13988
4075970000000	-3383050000000	0.11852
4074240000000	-3405450000000	0.12214
4072510000000	-3427850000000	0.10746
4070780000000	-3450250000000	0.14065
4069050000000	-3472650000000	0.14634
4067330000000	-3495050000000	0.10735
4065600000000	-3517450000000	0.13181
4063870000000	-3539850000000	0.08832
4062140000000	-3562250000000	0.10575
4060410000000	-3584650000000	0.07441
4058680000000	-3607050000000	0.09825
4056950000000	-3629450000000	0.11107
4055220000000	-3651850000000	0.09375
4053490000000	-3674250000000	0.11325
4051770000000	-3696650000000	0.09903
4050040000000	-3719050000000	0.09411
4048310000000	-3741450000000	0.08646
4046580000000	-3763850000000	0.08646
4044850000000	-3786250000000	0.09148
4043120000000	-3808650000000	0.11304
4041390000000	-3831050000000	0.07327
4039660000000	-3853450000000	0.09044
4037930000000	-3875850000000	0.09861
4036210000000	-3898250000000	0.09179
4034480000000	-3920650000000	0.10854
4032750000000	-3943050000000	0.11154
4031020000000	-3965450000000	0.06831
4029290000000	-3987850000000	0.07095
4027560000000	-4010250000000	0.07715
4025830000000	-4032650000000	0.0694
4024100000000	-4055050000000	0.08346
4022370000000	-4077450000000	0.0861
4020640000000	-4099850000000	0.07638
4018920000000	-4122250000000	0.05766
4017190000000	-4144650000000	0.05223
4015460000000	-4167050000000	0.08243
4013730000000	-4189450000000	0.05585
4012000000000	-4211850000000	0.07229
4010270000000	-4234250000000	0.10544
4008540000000	-4256650000000	0.11071
4006810000000	-4279050000000	0.07488
4005080000000	-4301450000000	0.08046
4003360000000	-4323850000000	0.11759
4001630000000	-4346250000000	0.0815
3999900000000	-4368650000000	0.07772
3998170000000	-4391050000000	0.13181
3996440000000	-4413450000000	0.08713
3994710000000	-4435850000000	0.0938
3992980000000	-4458250000000	0.06903
3991250000000	-4480650000000	0.10766
3989520000000	-4503050000000	0.1088
3987790000000	-4525450000000	0.07751
3986070000000	-4547850000000	0.05559
3984340000000	-4570250000000	0.10673
3982610000000	-4592650000000	0.06603
3980880000000	-4615050000000	0.11345
3979150000000	-4637450000000	0.0545
3977420000000	-4659850000000	0.07208
3975690000000	-4682250000000	0.06154
3973960000000	-4704650000000	0.08088
3972230000000	-4727050000000	0.09246
3970510000000	-4749450000000	0.09794
3968780000000	-4771850000000	0.10104
3967050000000	-4794250000000	0.12405
3965320000000	-4816650000000	0.06836
3963590000000	-4839050000000	0.06148
3961860000000	-4861450000000	0.12566
3960130000000	-4883850000000	0.06624
3958400000000	-4906250000000	0.07038
3956670000000	-4928650000000	0.08424
3954950000000	-4951050000000	0.08879
3953220000000	-4973450000000	0.09494
3951490000000	-4995850000000	0.05688
3949760000000	-5018250000000	0.08936
3948030000000	-5040650000000	0.07643
3946300000000	-5063050000000	0.09303
3944570000000	-5085450000000	0.1224
3942840000000	-5107850000000	0.08175
3941110000000	-5130250000000	0.0787
3939380000000	-5152650000000	0.11666
3937660000000	-5175050000000	0.07514
3935930000000	-5197450000000	0.10068
3934200000000	-5219850000000	0.07271
3932470000000	-5242250000000	0.09339
3930740000000	-5264650000000	0.09649
3929010000000	-5287050000000	0.11433
3927280000000	-5309450000000	0.09835
3925550000000	-5331850000000	0.11568
3923820000000	-5354250000000	0.07317
3922100000000	-5376650000000	0.07043
3920370000000	-5399050000000	0.08165
3918640000000	-5421450000000	0.07633
3916910000000	-5443850000000	0.07229
3915180000000	-5466250000000	0.1043
3913450000000	-5488650000000	0.07255
3911720000000	-5511050000000	0.1042
3909990000000	-5533450000000	0.0845
3908260000000	-5555850000000	0.08046
3906530000000	-5578250000000	0.07105
3904810000000	-5600650000000	0.07907
3903080000000	-5623050000000	0.04592
3901350000000	-5645450000000	0.06666
3899620000000	-5667850000000	0.07896
3897890000000	-5690250000000	0.09437
3896160000000	-5712650000000	0.06898
3894430000000	-5735050000000	0.08108
3892700000000	-5757450000000	0.08196
3890970000000	-5779850000000	0.07612
3889250000000	-5802250000000	0.09784
3887520000000	-5824650000000	0.04913
3885790000000	-5847050000000	0.06588
3884060000000	-5869450000000	0.0756
3882330000000	-5891850000000	0.08868
3880600000000	-5914250000000	0.07576
3878870000000	-5936650000000	0.08863
3877140000000	-5959050000000	0.08972
3875410000000	-5981450000000	0.07389
3873680000000	-6003850000000	0.06909
3871960000000	-6026250000000	0.08698
3870230000000	-6048650000000	0.07974
3868500000000	-6071050000000	0.04566
3866770000000	-6093450000000	0.0649
3865040000000	-6115850000000	0.05347
3863310000000	-6138250000000	0.06847
3861580000000	-6160650000000	0.09654
3859850000000	-6183050000000	0.07601
3858120000000	-6205450000000	0.06955
3856400000000	-6227850000000	0.07503
3854670000000	-6250250000000	0.09422
3852940000000	-6272650000000	0.08372
3851210000000	-6295050000000	0.06148
3849480000000	-6317450000000	0.06516
3847750000000	-6339850000000	0.08232
3846020000000	-6362250000000	0.0694
3844290000000	-6384650000000	0.06345
3842560000000	-6407050000000	0.06283
3840840000000	-6429450000000	0.0709
3839110000000	-6451850000000	0.07162
3837380000000	-6474250000000	0.07291
3835650000000	-6496650000000	0.05792
3833920000000	-6519050000000	0.07022
3832190000000	-6541450000000	0.05512
3830460000000	-6563850000000	0.06505
3828730000000	-6586250000000	0.08269
3827000000000	-6608650000000	0.08786
3825270000000	-6631050000000	0.07152
3823550000000	-6653450000000	0.06355
3821820000000	-6675850000000	0.07881
3820090000000	-6698250000000	0.06764
3818360000000	-6720650000000	0.08
3816630000000	-6743050000000	0.05378
3814900000000	-6765450000000	0.07038
3813170000000	-6787850000000	0.07462
3811440000000	-6810250000000	0.07338
3809710000000	-6832650000000	0.06753
3807990000000	-6855050000000	0.053
3806260000000	-6877450000000	0.05249
3804530000000	-6899850000000	0.05337
3802800000000	-6922250000000	0.05673
3801070000000	-6944650000000	0.08641
3799340000000	-6967050000000	0.06712
3797610000000	-6989450000000	0.05171
3795880000000	-7011850000000	0.06588
3794150000000	-7034250000000	0.04561
3792420000000	-7056650000000	0.0468
3790700000000	-7079050000000	0.0619
3788970000000	-7101450000000	0.065
3787240000000	-7123850000000	0.05455
3785510000000	-7146250000000	0.07519
3783780000000	-7168650000000	0.08119
3782050000000	-7191050000000	0.05776
3780320000000	-7213450000000	0.07757
3778590000000	-7235850000000	0.07369
3776860000000	-7258250000000	0.06753
3775140000000	-7280650000000	0.0621
3773410000000	-7303050000000	0.06004
3771680000000	-7325450000000	0.08646
3769950000000	-7347850000000	0.06893
3768220000000	-7370250000000	0.08031
3766490000000	-7392650000000	0.0452
3764760000000	-7415050000000	0.06397
3763030000000	-7437450000000	0.06319
3761300000000	-7459850000000	0.06345
3759580000000	-7482250000000	0.04209
3757850000000	-7504650000000	0.05745
3756120000000	-7527050000000	0.08351
3754390000000	-7549450000000	0.05636
3752660000000	-7571850000000	0.05921
3750930000000	-7594250000000	0.07669
3749200000000	-7616650000000	0.06909
3747470000000	-7639050000000	0.06645
3745740000000	-7661450000000	0.04995
3744010000000	-7683850000000	0.02927
3742290000000	-7706250000000	0.05874
3740560000000	-7728650000000	0.05481
3738830000000	-7751050000000	0.04158
3737100000000	-7773450000000	0.0528
3735370000000	-7795850000000	0.06872
3733640000000	-7818250000000	0.05393
3731910000000	-7840650000000	0.06712
3730180000000	-7863050000000	0.0558
3728450000000	-7885450000000	0.05771
3726730000000	-7907850000000	0.05445
3725000000000	-7930250000000	0.06247
3723270000000	-7952650000000	0.05409
3721540000000	-7975050000000	0.05218
3719810000000	-7997450000000	0.04871
3718080000000	-8019850000000	0.02979
3716350000000	-8042250000000	0.03801
3714620000000	-8064650000000	0.05223
3712890000000	-8087050000000	0.06055
3711160000000	-8109450000000	0.04121
3709440000000	-8131850000000	0.02472
3707710000000	-8154250000000	0.0589
3705980000000	-8176650000000	0.05362
3704250000000	-8199050000000	0.04675
3702520000000	-8221450000000	0.04778
3700790000000	-8243850000000	0.05719
3699060000000	-8266250000000	0.05362
3697330000000	-8288650000000	0.05988
3695600000000	-8311050000000	0.06764
3693880000000	-8333450000000	0.04127
3692150000000	-8355850000000	0.05564
3690420000000	-8378250000000	0.04385
3688690000000	-8400650000000	0.06019
3686960000000	-8423050000000	0.06231
3685230000000	-8445450000000	0.03728
3683500000000	-8467850000000	0.04339
3681770000000	-8490250000000	0.04276
3680040000000	-8512650000000	0.0515
3678320000000	-8535050000000	0.04638
3676590000000	-8557450000000	0.06112
3674860000000	-8579850000000	0.04152
3673130000000	-8602250000000	0.04333
3671400000000	-8624650000000	0.06179
3669670000000	-8647050000000	0.05533
3667940000000	-8669450000000	0.04763
3666210000000	-8691850000000	0.06495
3925550000000	1197910000000	-0.72736
3923820000000	1175510000000	-0.75177
3922100000000	1153110000000	-0.76702
3920370000000	1130710000000	-0.77892
3918640000000	1108310000000	-0.76025
3916910000000	1085910000000	-0.79081
3915180000000	1063510000000	-0.81884
3913450000000	1041110000000	-0.80503
3911720000000	1018710000000	-0.8283
3909990000000	996314000000	-0.83352
3908260000000	973914000000	-0.84113
3906530000000	951514000000	-0.86026
3904810000000	929114000000	-0.878
3903080000000	906714000000	-0.88337
3901350000000	884314000000	-0.9023
3899620000000	861914000000	-0.91549
3897890000000	839514000000	-0.93984
3896160000000	817114000000	-0.93705
3894430000000	794714000000	-0.96151
3892700000000	772314000000	-0.98178
3890970000000	749914000000	-0.99559
3889250000000	727514000000	-1.03483
3887520000000	705114000000	-1.03768
3885790000000	682714000000	-1.05324
3884060000000	660314000000	-1.09001
3882330000000	637914000000	-1.09704
3880600000000	615514000000	-1.09875
3878870000000	593114000000	-1.13102
3877140000000	570714000000	-1.14125
3875410000000	548314000000	-1.17988
3873680000000	525914000000	-1.19571
3871960000000	503514000000	-1.19328
3870230000000	481114000000	-1.19141
3868500000000	458714000000	-1.20987
3866770000000	436314000000	-1.21515
3865040000000	413914000000	-1.20232
3863310000000	391514000000	-1.21453
3861580000000	369114000000	-1.19695
3859850000000	346714000000	-1.17073
3858120000000	324314000000	-1.16804
3856400000000	301914000000	-1.12016
3854670000000	279514000000	-1.08608
3852940000000	257114000000	-1.05784
3851210000000	234714000000	-1.01058
3849480000000	212314000000	-0.96306
3847750000000	189914000000	-0.89496
3846020000000	167514000000	-0.83497
3844290000000	145114000000	-0.75823
3842560000000	122714000000	-0.65647
3840840000000	100314000000	-0.55486
3839110000000	77914000000	-0.46307
3837380000000	55514000000	-0.33426
3835650000000	33114000000	-0.19743
3833920000000	10714000000	-0.08382
3832190000000	-11686000000	0.06164
3830460000000	-34086000000	0.17028
3828730000000	-56486000000	0.30747
3827000000000	-78886000000	0.44957
3825270000000	-101286000000	0.55387
3823550000000	-123686000000	0.66898
3821820000000	-146086000000	0.77928
3820090000000	-168486000000	0.83518
3818360000000	-190886000000	0.91042
3816630000000	-213286000000	0.97294
3814900000000	-235686000000	1.02816
3813170000000	-258086000000	1.01818
3811440000000	-280486000000	1.05836
3809710000000	-302886000000	1.05521
3807990000000	-325286000000	1.0292
3806260000000	-347686000000	1.0459
3804530000000	-370086000000	1.02889
3802800000000	-392486000000	0.99512
3801070000000	-414886000000	0.98964
3799340000000	-437286000000	0.95923
3797610000000	-459686000000	0.95194
3795880000000	-482086000000	0.90633
3794150000000	-504486000000	0.91642
3792420000000	-526886000000	0.8736
3790700000000	-549286000000	0.85747
3788970000000	-571686000000	0.8357
3787240000000	-594086000000	0.80901
3785510000000	-616486000000	0.82458
3783780000000	-638886000000	0.78569
3782050000000	-661286000000	0.74029
3780320000000	-683686000000	0.74546
3778590000000	-706086000000	0.74893
3776860000000	-728486000000	0.7225
3775140000000	-750886000000	0.69866
3773410000000	-773286000000	0.6998
3771680000000	-795686000000	0.66609
3769950000000	-818086000000	0.67183
3768220000000	-840486000000	0.63966
3766490000000	-862886000000	0.6152
3764760000000	-885286000000	0.62673
3763030000000	-907686000000	0.62017
3761300000000	-930086000000	0.61634
3759580000000	-952486000000	0.59607
3757850000000	-974886000000	0.60931
3756120000000	-997286000000	0.57021
3754390000000	-1019690000000	0.56551
3752660000000	-1042090000000	0.5954
3750930000000	-1064490000000	0.56468
3749200000000	-1086890000000	0.55325
3747470000000	-1109290000000	0.55232
3745740000000	-1131690000000	0.54053
3744010000000	-1154090000000	0.52807
3742290000000	-1176490000000	0.54405
3740560000000	-1198890000000	0.53004
3738830000000	-1221290000000	0.49435
3737100000000	-1243690000000	0.5049
3735370000000	-1266090000000	0.51504
3733640000000	-1288490000000	0.50459
3731910000000	-1310890000000	0.48748
3730180000000	-1333290000000	0.48577
3728450000000	-1355690000000	0.46772
3726730000000	-1378090000000	0.46529
3725000000000	-1400490000000	0.45769
3723270000000	-1422890000000	0.46788
3721540000000	-1445290000000	0.45097
3719810000000	-1467690000000	0.46074
3718080000000	-1490090000000	0.4444
3716350000000	-1512490000000	0.4458
3714620000000	-1534890000000	0.44652
3712890000000	-1557290000000	0.44311
3711160000000	-1579690000000	0.44983
3709440000000	-1602090000000	0.43473
3707710000000	-1624490000000	0.43778
3705980000000	-1646890000000	0.42423
3704250000000	-1669290000000	0.42294
3702520000000	-1691690000000	0.41312
3700790000000	-1714090000000	0.40614
3699060000000	-1736490000000	0.40303
3697330000000	-1758890000000	0.39926
3695600000000	-1781290000000	0.38654
3693880000000	-1803690000000	0.41151
3692150000000	-1826090000000	0.39098
3690420000000	-1848490000000	0.39347
3688690000000	-1870890000000	0.40546
3686960000000	-1893290000000	0.39636
3685230000000	-1915690000000	0.3915
3683500000000	-1938090000000	0.38287
3681770000000	-1960490000000	0.38768
3680040000000	-1982890000000	0.37837
3678320000000	-2005290000000	0.36937
3676590000000	-2027690000000	0.38023
3674860000000	-2050090000000	0.36099
3673130000000	-2072490000000	0.36032
3671400000000	-2094890000000	0.35406
3669670000000	-2117290000000	0.37806
3667940000000	-2139690000000	0.35753
3666210000000	-2162090000000	0.33198
3664480000000	-2184490000000	0.35851
3662750000000	-2206890000000	0.35008
3661030000000	-2229290000000	0.34843
3659300000000	-2251690000000	0.33633
3657570000000	-2274090000000	0.31787
3655840000000	-2296490000000	0.337
3654110000000	-2318890000000	0.32966
3652380000000	-2341290000000	0.32397
3650650000000	-2363690000000	0.3145
3648920000000	-2386090000000	0.30566
3647190000000	-2408490000000	0.31756
3645470000000	-2430890000000	0.29868
3643740000000	-2453290000000	0.27298
3642010000000	-2475690000000	0.30452
3640280000000	-2498090000000	0.26734
3638550000000	-2520490000000	0.29403
3636820000000	-2542890000000	0.28849
3635090000000	-2565290000000	0.28162
3633360000000	-2587690000000	0.25059
3631630000000	-2610090000000	0.25633
3629900000000	-2632490000000	0.25214
3628180000000	-2654890000000	0.26186
3626450000000	-2677290000000	0.25566
3624720000000	-2699690000000	0.22701
3622990000000	-2722090000000	0.22856
3621260000000	-2744490000000	0.20234
3619530000000	-2766890000000	0.21403
3617800000000	-2789290000000	0.20017
3616070000000	-2811690000000	0.18828
3614340000000	-2834090000000	0.21982
3612620000000	-2856490000000	0.20912
3610890000000	-2878890000000	0.21476
3609160000000	-2901290000000	0.19257
3607430000000	-2923690000000	0.17282
3605700000000	-2946090000000	0.23999
3603970000000	-2968490000000	0.19045
3602240000000	-2990890000000	0.20643
3600510000000	-3013290000000	0.20477
3598780000000	-3035690000000	0.19154
3597050000000	-3058090000000	0.17189
3595330000000	-3080490000000	0.17308
3593600000000	-3102890000000	0.19159
3591870000000	-3125290000000	0.15146
3590140000000	-3147690000000	0.17892
3588410000000	-3170090000000	0.1646
3586680000000	-3192490000000	0.14763
3584950000000	-3214890000000	0.16201
3583220000000	-3237290000000	0.151
3581490000000	-3259690000000	0.14495
3579770000000	-3282090000000	0.12912
3578040000000	-3304490000000	0.17416
3576310000000	-3326890000000	0.12638
3574580000000	-3349290000000	0.13378
3572850000000	-3371690000000	0.14862
3571120000000	-3394090000000	0.14055
3569390000000	-3416490000000	0.11847
3567660000000	-3438890000000	0.10125
3565930000000	-3461290000000	0.11997
3564210000000	-3483690000000	0.12199
3562480000000	-3506090000000	0.11268
3560750000000	-3528490000000	0.15979
3559020000000	-3550890000000	0.14086
3557290000000	-3573290000000	0.1165
3555560000000	-3595690000000	0.12302
3553830000000	-3618090000000	0.11547
3552100000000	-3640490000000	0.14024
3550370000000	-3662890000000	0.13129
3548640000000	-3685290000000	0.10704
3546920000000	-3707690000000	0.09504
3545190000000	-3730090000000	0.15467
3543460000000	-3752490000000	0.12183
3541730000000	-3774890000000	0.0997
3540000000000	-3797290000000	0.09841
3538270000000	-3819690000000	0.14484
3536540000000	-3842090000000	0.14857
3534810000000	-3864490000000	0.1209
3533080000000	-3886890000000	0.17902
3531360000000	-3909290000000	0.07829
3529630000000	-3931690000000	0.13352
3527900000000	-3954090000000	0.08382
3526170000000	-3976490000000	0.14484
3524440000000	-3998890000000	0.10699
3522710000000	-4021290000000	0.15291
3520980000000	-4043690000000	0.13977
3519250000000	-4066090000000	0.11594
3517520000000	-4088490000000	0.16759
3515790000000	-4110890000000	0.145
3514070000000	-4133290000000	0.16832
3512340000000	-4155690000000	0.13383
3510610000000	-4178090000000	0.09267
3508880000000	-4200490000000	0.13072
3507150000000	-4222890000000	0.09018
3505420000000	-4245290000000	0.1437
3503690000000	-4267690000000	0.12312
3501960000000	-4290090000000	0.13874
3500230000000	-4312490000000	0.13879
3498510000000	-4334890000000	0.09417
3496780000000	-4357290000000	0.14143
3495050000000	-4379690000000	0.15312
3493320000000	-4402090000000	0.13652
3491590000000	-4424490000000	0.14205
3489860000000	-4446890000000	0.13326
3488130000000	-4469290000000	0.13574
3486400000000	-4491690000000	0.09592
3484670000000	-4514090000000	0.12209
3482950000000	-4536490000000	0.1286
3481220000000	-4558890000000	0.11444
3479490000000	-4581290000000	0.08062
3477760000000	-4603690000000	0.12012
3476030000000	-4626090000000	0.10446
3474300000000	-4648490000000	0.10497
3472570000000	-4670890000000	0.09251
3470840000000	-4693290000000	0.08718
3469110000000	-4715690000000	0.13977
3467380000000	-4738090000000	0.12168
3465660000000	-4760490000000	0.10854
3463930000000	-4782890000000	0.11604
3462200000000	-4805290000000	0.13693
3460470000000	-4827690000000	0.09727
3458740000000	-4850090000000	0.11407
3457010000000	-4872490000000	0.09815
3455280000000	-4894890000000	0.09179
3453550000000	-4917290000000	0.11764
3451820000000	-4939690000000	0.1089
3450100000000	-4962090000000	0.10203
3448370000000	-4984490000000	0.12659
3446640000000	-5006890000000	0.10792
3444910000000	-5029290000000	0.08641
3443180000000	-5051690000000	0.121
3441450000000	-5074090000000	0.11413
3439720000000	-5096490000000	0.11511
3437990000000	-5118890000000	0.10063
3436260000000	-5141290000000	0.10523
3434530000000	-5163690000000	0.10306
3432810000000	-5186090000000	0.09117
3431080000000	-5208490000000	0.1057
3429350000000	-5230890000000	0.08543
3427620000000	-5253290000000	0.13186
3425890000000	-5275690000000	0.11687
3424160000000	-5298090000000	0.09122
3422430000000	-5320490000000	0.09468
3420700000000	-5342890000000	0.083
3418970000000	-5365290000000	0.11904
3417250000000	-5387690000000	0.07757
3415520000000	-5410090000000	0.09344
3413790000000	-5432490000000	0.0802
3412060000000	-5454890000000	0.10771
3410330000000	-5477290000000	0.10353
3408600000000	-5499690000000	0.10585
3406870000000	-5522090000000	0.06919
3405140000000	-5544490000000	0.11666
3403410000000	-5566890000000	0.08512
[truncated: 11,569 more rows]

## Sheet: Fig2b
B (T), 300K	MRdrag (%), 300K	B (T), 250K	MRdrag (%), 250K	B (T), 200K	MRdrag (%), 200K	B (T), 150K	MRdrag (%), 150K
9	94.7098	9	114.606	9	200.598	9	682.67
8.9988	95.6031	8.9903	115.015	9	199.509	8.9986	687.741
8.9795	95.6516	8.9812	115.155	9	202.07	8.9886	689.6
8.9702	95.3578	8.9722	115.187	9	200.517	8.9796	692.587
8.9612	94.7052	8.9629	115.328	9	200.794	8.9706	683.764
8.9529	94.8847	8.9536	114.336	9	199.418	8.9527	684.423
8.9436	94.937	8.9446	113.738	9	199.911	8.9437	678.683
8.9346	95.5368	8.9353	114.118	8.9998	200.524	8.9348	680.207
8.9254	95.4622	8.9264	114.117	8.9998	200.508	8.9255	677.717
8.9161	94.3743	8.9181	114.446	8.9996	199.603	8.9162	675.867
8.9071	94.7741	8.9041	113.589	8.9995	198.99	8.9072	676.572
8.8895	94.2358	8.8995	113.913	8.9992	199.213	8.899	677.62
8.8803	94.2857	8.8816	113.387	8.9987	197.408	8.8896	677.19
8.8713	94.1541	8.8722	113.484	8.998	197.541	8.88	675.327
8.8623	93.6815	8.863	112.69	8.9968	198.563	8.8711	676.523
8.8531	93.7173	8.8543	113.567	8.9949	197.735	8.8531	668.598
8.8437	93.1573	8.8457	113.047	8.9919	198.832	8.8439	672.954
8.8348	93.1347	8.8365	112.032	8.9875	198.089	8.8346	670.781
8.8255	92.699	8.8272	113.106	8.9709	197.544	8.826	671.414
8.8172	92.3648	8.8183	112.558	8.9709	196.217	8.8171	670.456
8.8083	92.5034	8.8089	111.855	8.9526	195.534	8.8081	663.316
8.7897	92.1629	8.8	111.808	8.9433	197.177	8.7991	665.758
8.7804	92.1439	8.7821	112.276	8.9343	197.317	8.7899	669.431
8.7725	92.1224	8.7732	111.985	8.925	195.086	8.7806	657.658
8.7631	92.5791	8.7638	111.82	8.916	195.52	8.7626	658.309
8.7539	92.4647	8.7545	110.831	8.9067	195.612	8.754	659.493
8.7446	91.949	8.7459	111.95	8.8974	195.244	8.7448	659.133
8.736	91.8518	8.7366	111.295	8.8881	194.013	8.7354	661.587
8.7267	92.1777	8.7276	110.894	8.8795	196.07	8.7265	655.48
8.709	91.9272	8.7189	110.379	8.8702	194.499	8.7175	659.936
8.7	91.6716	8.7007	110.199	8.8609	193.804	8.7082	657.169
8.6907	91.5315	8.6914	110.839	8.8422	193.715	8.6989	652.276
8.6815	91.6051	8.6824	110.46	8.8333	193.861	8.6903	655.041
8.6728	91.3358	8.6735	109.896	8.8244	192.829	8.6817	654.429
8.6639	91.4974	8.6642	110.731	8.8151	193.468	8.6631	651.011
8.6549	90.9955	8.6559	109.938	8.8058	191.54	8.6631	652.076
8.6459	91.3471	8.6466	109.418	8.7968	191.746	8.6448	650.933
8.6366	90.8711	8.6373	109.106	8.7875	190.44	8.6355	647.166
8.6274	90.7784	8.628	109.135	8.7775	192.656	8.6269	644.863
8.6194	90.4363	8.6197	109.267	8.7682	191.258	8.618	641.313
8.6009	90.5347	8.6015	108.051	8.7592	192.788	8.609	644.374
8.5916	90.305	8.5925	108.799	8.7503	189.737	8.5997	645.305
8.5827	89.9075	8.5836	108.702	8.7317	190.171	8.5911	642.109
8.5733	89.6657	8.5743	108.09	8.7224	189.599	8.5818	638.338
8.5644	89.9355	8.5657	108.142	8.7133	189.768	8.5726	641.734
8.5561	90.076	8.5567	107.86	8.7044	188.502	8.5553	643.438
8.5468	89.444	8.5474	107.801	8.6951	188.816	8.546	637.031
8.5368	90.0593	8.5385	107.696	8.6858	188.067	8.5368	634.572
8.5285	89.827	8.5205	107.708	8.6768	188.587	8.5275	634.802
8.5192	90.0983	8.5116	107.249	8.6675	187.735	8.5189	626.484
8.501	90.2053	8.503	107.22	8.6582	188.226	8.5099	632.635
8.501	89.6535	8.4937	107.213	8.6492	187.925	8.5009	635.234
8.4823	89.7459	8.4843	106.989	8.6402	187.033	8.4826	633.093
8.4737	89.4851	8.475	106.614	8.6309	185.201	8.4733	630.162
8.4644	89.7451	8.4664	106.592	8.6216	186.77	8.4644	628.952
8.4558	88.3607	8.4577	105.943	8.6024	186.95	8.4554	627.377
8.4468	88.7502	8.4484	106.045	8.5931	185.806	8.4461	625.878
8.4379	88.5349	8.4302	105.453	8.5845	185.259	8.4372	623.006
8.4286	88.994	8.4212	105.595	8.5751	184.589	8.4285	622.965
8.4192	88.5171	8.4129	105.819	8.5659	184.705	8.4195	620.913
8.4103	88.6335	8.4036	105.924	8.5565	184.074	8.401	620.764
8.401	88.83	8.3943	105.117	8.5476	184.64	8.3917	622.095
8.3828	88.8765	8.385	104.95	8.5383	184.528	8.3834	614.688
8.3745	88.2276	8.3768	105.224	8.5293	183.804	8.3745	620.459
8.3653	88.1268	8.3678	105.063	8.5153	184	8.3652	617.609
8.3559	88.1934	8.3496	104.394	8.511	183.035	8.3562	617.265
8.3474	87.8491	8.3403	103.766	8.4924	181.495	8.347	615.597
8.3381	87.9716	8.3314	103.98	8.4831	181.062	8.3377	613.317
8.3287	88.1669	8.3224	103.522	8.4744	181.836	8.3291	613.108
8.3194	87.1796	8.3138	103.908	8.4651	182.626	8.3204	609.859
8.3105	86.74	8.3044	104.294	8.4558	180.461	8.3111	611.545
8.3012	86.4511	8.2955	103.535	8.4465	180.452	8.2932	609.185
8.284	86.7057	8.2862	104.032	8.4376	181.348	8.2843	609.86
8.2747	86.337	8.2776	103.031	8.4283	178.934	8.2753	610.403
8.2654	86.375	8.2639	102.61	8.4192	179.979	8.2663	605.107
8.2563	86.1985	8.2596	103.797	8.4053	178.994	8.2573	605.808
8.247	86.8511	8.2413	102.39	8.3917	178.691	8.248	601.545
8.2384	87.1386	8.232	102.268	8.3824	179.104	8.2387	602.103
8.2295	86.8444	8.2234	102.834	8.3731	177.115	8.2298	602.009
8.2202	86.5381	8.2148	102.751	8.3632	179.528	8.2211	599.073
8.2022	86.2104	8.2055	102.716	8.3542	177.557	8.2122	597.098
8.1929	85.5378	8.1962	100.808	8.3452	177.413	8.1939	599.865
8.1847	85.0125	8.1872	102.016	8.3359	177.851	8.1849	598.289
8.1757	85.0307	8.1693	101.891	8.3266	176.226	8.1763	597.332
8.1664	85.7907	8.1606	101.19	8.3173	176.135	8.1674	593.788
8.1571	85.1268	8.1513	101.607	8.3083	176.555	8.1581	595.756
8.1482	85.6085	8.1421	101.286	8.2994	174.666	8.1488	588.882
8.1389	85.5859	8.1328	100.833	8.2901	175.554	8.1396	589.269
8.1306	85.1602	8.1245	101.056	8.2718	176.419	8.1313	588.645
8.1216	85.8765	8.1152	101.017	8.2625	174.133	8.113	587.091
8.1123	84.9119	8.1063	101.255	8.2531	175.735	8.1037	591.872
8.0937	85.3182	8.0883	100.819	8.2442	174.116	8.0948	590.636
8.0858	85.6983	8.0791	100.618	8.2352	173.688	8.0858	585.843
8.0765	85.0919	8.0704	99.5047	8.2259	174.876	8.0765	583.126
8.0673	84.9294	8.0615	99.7058	8.2166	173.227	8.0676	582.128
8.0583	84.7349	8.0525	99.9639	8.2073	172.934	8.0589	582.145
8.049	84.2583	8.0432	99.5442	8.1987	173.326	8.05	580.716
8.04	84.4206	8.0343	99.1107	8.1884	173.031	8.0407	586.032
8.0317	83.9315	8.0249	99.2652	8.1794	173.006	8.0224	578.281
8.0223	83.5443	8.0159	99.7079	8.1654	172.12	8.0131	580.3
8.0041	84.3691	7.9983	99.0868	8.1608	171.825	8.0038	581.254
7.9951	84.2297	7.989	98.5971	8.1426	172.222	7.9955	574.032
7.9859	84.0164	7.9797	99.0884	8.1333	170.799	7.9862	572.882
7.9772	83.8687	7.9711	98.483	8.1243	171.715	7.9772	571.969
7.9686	83.5931	7.9621	98.2513	8.115	168.341	7.9683	574.081
7.9593	83.329	7.9532	98.6911	8.106	169.139	7.9593	572.403
7.95	83.176	7.9442	98.1127	8.0967	169.722	7.95	569.312
7.9407	83.4225	7.935	98.6243	8.0874	169.82	7.9407	569.444
7.9235	83.2501	7.9174	97.6081	8.0781	170.703	7.9229	566.591
7.9142	82.6299	7.9127	97.9216	8.0695	169.09	7.9143	568.065
7.9049	82.8542	7.8991	97.4623	8.0601	169.599	7.905	565.396
7.896	82.5665	7.8899	97.5674	8.0509	168.347	7.896	562.96
7.8866	82.912	7.8812	98.1826	8.0325	168.768	7.8867	565.288
7.8784	82.4615	7.8719	97.7305	8.0325	169.614	7.8774	563.985
7.8694	82.5003	7.863	97.3479	8.0142	169.286	7.8688	560.2
7.8601	82.4568	7.8543	97.647	8.0049	168.589	7.8595	560.687
7.8508	82.4819	7.8361	96.235	7.996	168.979	7.8462	559.605
7.8415	81.8988	7.8268	96.9926	7.9867	167.354	7.8326	558.132
7.8333	82.0528	7.8182	96.8605	7.9774	167.157	7.8237	558.217
7.815	82.2923	7.8095	96.9549	7.9684	164.865	7.8144	558.152
7.806	82.5346	7.8002	96.532	7.9591	167.487	7.8051	555.972
7.797	81.966	7.7912	96.8874	7.9491	166.182	7.7961	554.895
7.7877	82.1941	7.7819	95.9023	7.9402	165.099	7.7874	554.465
7.7794	82.474	7.7726	95.8494	7.9309	165.836	7.7785	551.709
7.7701	81.8176	7.7553	95.8844	7.9216	165.936	7.7696	551.048
7.7611	81.9347	7.7461	95.4571	7.9037	163.741	7.7602	547.362
7.7519	81.9038	7.7367	94.9487	7.9037	164.642	7.7423	549.696
7.7429	81.8793	7.7278	94.8145	7.8851	165.589	7.7337	544.013
7.7336	81.4446	7.7188	95.1115	7.8758	164.021	7.7244	547.955
7.7163	81.2608	7.7099	95.7003	7.8668	165.489	7.7151	544.223
7.707	81.8162	7.7012	95.6015	7.8575	164.828	7.7058	544.466
7.6978	81.039	7.6919	95.6469	7.8486	163.579	7.6972	544.359
7.6885	80.9313	7.6737	94.472	7.8393	162.905	7.6883	542.604
7.6795	80.7334	7.6698	94.2244	7.8303	163.857	7.6793	543.089
7.6706	80.5364	7.6562	95.2088	7.821	164.192	7.6704	540.865
7.662	80.4086	7.6468	94.0581	7.8117	162.754	7.6614	536.878
7.653	80.3635	7.6382	94.5793	7.8024	163.27	7.6428	537.512
7.6437	79.9979	7.6289	94.0942	7.7934	161.294	7.6342	535.741
7.6254	79.9997	7.6196	93.979	7.7844	162.46	7.6252	534.141
7.6254	80.1524	7.611	94.7714	7.7744	159.691	7.6163	534.11
7.6078	80.1031	7.6024	93.3959	7.7558	159.767	7.6073	533.443
7.5986	80.0005	7.5884	94.0966	7.7512	161.439	7.598	533.453
7.5899	80.0749	7.5748	93.4095	7.7375	160.768	7.5891	530.192
7.5807	80.3409	7.5658	93.6111	7.7286	160.632	7.5808	532.517
7.5713	79.8798	7.5565	93.2144	7.7193	160.197	7.5621	528.229
7.562	80.0574	7.5482	93.2181	7.71	159.351	7.5528	527.237
7.553	79.8832	7.5389	93.1747	7.701	159.494	7.5436	527.472
7.5438	79.6112	7.5296	92.9604	7.6917	158.741	7.5352	527.921
7.5348	79.3548	7.5203	93.2388	7.6824	159.526	7.5263	524.328
7.5261	79.5184	7.512	92.6925	7.6735	159.563	7.517	520.383
7.5079	79.1324	7.503	92.3957	7.6645	158.868	7.508	517.084
7.499	79.0405	7.4848	92.7274	7.6552	158.864	7.4987	521.48
7.4896	78.7073	7.4755	93.3658	7.6413	158.57	7.4809	518.274
7.4807	78.4815	7.4665	91.9935	7.6273	157.731	7.4723	518.467
7.472	78.7184	7.4579	91.9822	7.6187	156.725	7.4629	515.123
7.4631	78.9399	7.449	91.7514	7.6094	157.5	7.454	516.722
7.4542	78.975	7.4397	91.9263	7.6001	156.657	7.4451	516.748
7.4449	78.5304	7.4307	91.8157	7.5908	156.51	7.4361	516.613
7.4356	78.6219	7.4218	91.1439	7.5818	156.359	7.4272	513.408
7.422	78.7972	7.4128	91.3923	7.5725	157.648	7.4182	512.001
7.4084	78.6949	7.3995	91.4953	7.5635	155.872	7.4092	510.436
7.3991	78.6511	7.386	91.4717	7.5542	155.999	7.3907	509.835
7.3905	78.4509	7.3766	91.5179	7.5452	155.074	7.382	507.196
7.3815	78.1402	7.3673	91.1021	7.5306	156.203	7.3734	506.394
7.3726	78.0194	7.3587	91.2315	7.5166	155.564	7.3641	507.13
7.3632	77.3386	7.3501	90.1209	7.5074	156.046	7.3552	504.522
7.3543	76.8523	7.3407	90.7499	7.4987	154.506	7.3459	504.015
7.345	77.4745	7.3317	90.3797	7.4894	155.353	7.3371	502.315
7.3366	76.9348	7.3181	89.9778	7.4801	153.591	7.3285	501.999
7.3184	77.4823	7.3048	90.4427	7.4708	154.95	7.3192	501.236
7.3184	77.5799	7.2959	89.7086	7.4615	155.582	7.31	498.898
7.2998	77.5804	7.2866	89.5541	7.4526	153.254	7.2914	500.071
7.2908	77.4548	7.2773	89.4359	7.4436	152.582	7.283	496.258
7.2825	77.0714	7.2683	89.5842	7.4343	153.844	7.2741	496.03
7.2732	77.2001	7.2597	88.865	7.425	153.814	7.2648	494.354
7.2642	77.1858	7.2507	88.9745	7.4067	153.084	7.2558	494.029
7.2549	76.4329	7.2371	88.8384	7.3974	153.549	7.2469	494.809
7.246	76.0331	7.2235	89.1638	7.3885	151.91	7.2376	495.919
7.2377	76.2052	7.2142	88.6547	7.3795	150.845	7.2283	491.858
7.2284	76.6708	7.2056	89.0958	7.3702	152.685	7.2197	490.768
7.2098	76.7772	7.1967	88.3027	7.3609	150.25	7.2018	490.213
7.2012	76.7588	7.1877	88.5134	7.3516	150.356	7.2018	491.814
7.1919	76.4512	7.1787	88.1597	7.3422	150.221	7.1836	485.781
7.1833	76.3228	7.1694	87.9782	7.3326	150.68	7.1743	485.509
7.1743	76.3191	7.1562	87.4992	7.3236	149.886	7.1649	484.81
7.1654	76.269	7.1429	88.0626	7.3143	150.548	7.1564	485.741
7.1561	75.7818	7.1336	87.203	7.2957	149.178	7.1474	479.666
7.1468	75.4985	7.1243	86.658	7.2911	148.443	7.1381	485.729
7.1295	75.2928	7.1154	87.6765	7.2774	149.686	7.1294	484.466
7.1295	75.3461	7.1063	86.8011	7.2685	148.782	7.1202	484.062
7.1112	74.7966	7.0977	86.8902	7.2592	148.25	7.1018	480.709
7.1019	74.7109	7.0887	86.1585	7.2502	148.333	7.1018	480.474
7.0926	75.1051	7.0747	85.9551	7.2409	147.919	7.0836	479.928
7.0846	75.0401	7.0608	86.9971	7.2316	147.663	7.075	479.454
7.0753	74.5768	7.0525	86.4686	7.2223	147.935	7.066	470.732
7.066	75.1646	7.0435	85.9795	7.2137	147.035	7.0571	475.759
7.0568	75.1873	7.0343	86.2262	7.2044	147.123	7.0478	473.18
7.0478	74.6093	7.0253	86.6556	7.1951	147.844	7.0385	473.164
7.0389	74.6399	7.0163	85.4476	7.1812	147.038	7.0292	470.686
7.0213	74.1658	7.0074	85.6511	7.1679	145.85	7.0209	470.631
7.012	73.9074	6.9941	85.2799	7.1586	146.242	7.0023	472.253
7.0027	73.1388	6.9805	85.2054	7.1493	145.595	6.9937	467.428
6.9938	73.8471	6.9713	85.0526	7.14	143.975	6.9848	466.999
6.9851	73.7371	6.9623	85.0417	7.131	144.57	6.9755	465.027
6.9762	74.1282	6.9533	85.2751	7.1217	144.474	6.9662	464.796
6.9669	73.7164	6.9447	85.0101	7.1126	145.262	6.9572	464.147
6.9579	73.936	6.9357	84.7621	7.1034	144.667	6.9479	463.707
6.9489	73.1469	6.9265	84.8163	7.0944	144.904	6.9393	462.508
6.9396	73.9024	6.9171	84.3585	7.0851	143.523	6.9214	459.754
6.931	73.5109	6.8992	84.1772	7.0751	144.81	6.9121	458.82
6.9131	72.9339	6.8906	83.9588	7.0658	144.013	6.9028	461.218
6.9038	73.1921	6.8812	83.6442	7.0519	142.504	6.8942	460.232
6.8945	72.9075	6.8722	84.2174	7.0386	143.672	6.8848	453.89
6.8856	73.1568	6.863	83.731	7.0293	142.155	6.8759	454.049
6.8772	73.226	6.8543	83.6273	7.02	141.476	6.8672	449.814
6.8679	73.1346	6.8454	83.5189	7.0107	142.553	6.8583	451.819
6.8589	72.9691	6.8364	83.2302	7.0017	142.225	6.8397	450.065
6.8496	72.5361	6.8271	82.57	6.9928	143.032	6.831	451.348
6.8403	72.524	6.8092	82.5989	6.9835	140.75	6.8224	450.861
6.8314	71.9676	6.8048	82.5951	6.9742	141.466	6.8131	454.255
6.8138	71.7568	6.7912	82.6151	6.9653	140.315	6.8041	450.949
6.8045	71.457	6.7823	82.0421	6.9559	141.597	6.7948	448.006
6.7955	71.4253	6.7733	81.6924	6.9423	140.938	6.7855	445.803
6.7866	71.9514	6.7641	81.7097	6.9287	139.137	6.7769	445.986
6.7773	72.3475	6.7548	82.2035	6.9194	139.353	6.759	443.825
6.768	72.137	6.7461	81.5825	6.9101	138.756	6.7497	446.221
6.7597	71.7899	6.7282	81.1972	6.9001	138.198	6.7404	445.856
6.7507	71.2009	6.7193	81.3351	6.8909	139.337	6.7322	439.218
6.7415	71.2353	6.71	80.8544	6.8818	139.056	6.7228	438.51
6.7325	71.176	6.701	81.2088	6.8728	138.819	6.7139	439.626
6.7232	70.5814	6.6921	80.0557	6.8636	137.7	6.7049	441.117
6.7046	69.8403	6.6834	80.7495	6.8542	138.627	6.6957	441.012
6.7046	70.4494	6.6741	80.856	6.8449	137.375	6.6867	434.39
6.6867	70.9656	6.6648	80.7327	6.836	137.007	6.6774	433.854
6.6781	71.2608	6.6558	80.6206	6.8177	136.665	6.6591	435.492
6.6691	71.112	6.6425	80.1293	6.8084	137.756	6.6497	434.068
6.6601	71.3315	6.6292	79.6709	6.7994	135.912	6.6412	430.919
6.6508	71.3495	6.6199	80.0215	6.7902	135.193	6.6325	430.977
6.6415	70.497	6.6107	80.7456	6.7808	135.706	6.6232	429.78
6.6325	70.4148	6.6016	79.2033	6.7716	134.46	6.6139	428.695
6.6242	69.8747	6.593	79.552	6.763	136.008	6.6049	431.073
6.6149	69.7853	6.5841	79.4122	6.7536	134.802	6.596	427.264
6.5967	69.9534	6.5748	79.1769	6.7444	134.655	6.587	431.599
6.5874	69.9364	6.5662	78.7915	6.7351	134.741	6.5784	427.32
6.5781	69.5333	6.5569	78.9155	6.7261	134.949	6.5602	425.55
6.5694	69.1639	6.5393	78.4179	6.7168	132.36	6.5509	420.409
6.5601	69.6382	6.5304	78.7068	6.7032	133.612	6.5419	420.954
6.5508	69.7883	6.5211	78.0404	6.6892	133.555	6.533	423.721
6.5422	69.7725	6.5118	77.9256	6.6803	133.804	6.5243	421.306
6.5336	69.0409	6.5028	77.5949	6.6709	131.721	6.5154	423.015
6.5243	69.3733	6.4938	78.2919	6.661	131.88	6.5061	420.773
6.5151	69.1478	6.4852	78.0152	6.6516	132.151	6.4968	417.712
6.4968	68.6235	6.4763	77.6577	6.6427	131.771	6.4875	419.107
6.4885	68.1175	6.4577	77.1359	6.6337	130.308	6.4786	419.135
6.4796	67.7364	6.449	77.4509	6.6244	130.936	6.4696	414.344
6.4702	68.1493	6.4401	77.2413	6.6151	132.15	6.4514	413.414
6.4609	68.1288	6.4311	77.3703	6.6058	130.532	6.4427	412.16
6.4517	67.9757	6.4217	76.819	6.5925	129.192	6.4334	410.176
6.443	67.9701	6.4128	76.8018	6.5879	129.262	6.4244	412.302
6.4337	67.861	6.4035	76.5772	6.5693	129.382	6.4148	408.663
6.4251	67.9859	6.3948	76.8269	6.56	130.125	6.4061	407.58
6.4161	67.8748	6.3769	76.4366	6.551	129.941	6.3968	406.253
6.4071	67.9155	6.3676	76.0307	6.5417	128.81	6.3876	405.837
6.3885	66.9067	6.3586	75.7968	6.5328	128.386	6.3786	405.901
6.3795	66.7067	6.3497	75.6964	6.5235	128.766	6.3696	403.889
6.3709	66.7188	6.3407	74.9786	6.5145	128.8	6.3513	409.657
6.3619	66.8058	6.3318	75.6839	6.5052	127.661	6.3431	403.967
6.353	67.0005	6.3231	75.1018	6.4959	127.421	6.3337	402.707
6.3437	67.2873	6.3138	75.1724	6.4859	127.827	6.3245	396.72
6.3344	66.9938	6.3046	75.319	6.4767	126.611	6.3152	400.223
6.3264	66.4207	6.2913	74.7024	6.468	126.025	6.3066	403.28
6.3079	66.957	6.278	75.0486	6.4587	125.362	6.298	400.743
6.3079	67.0283	6.2687	74.4903	6.4401	125.054	6.2887	398.47
6.2896	66.9224	6.2597	74.1881	6.4308	125.627	6.2704	397.389
6.2803	66.2008	6.2505	73.8927	6.4218	125.573	6.2704	395.826
6.2714	66.0104	6.2415	74.2117	6.4128	125.123	6.2525	395.278
6.2621	66.2372	6.2332	74.1889	6.4035	124.325	6.2439	392.117
6.2531	65.6185	6.2239	73.6469	6.3942	125.104	6.2346	388.307
6.2445	65.8494	6.2146	73.5443	6.3852	124.222	6.2253	392.324
6.2355	65.6543	6.2053	73.4057	6.3759	124.731	6.2164	388.92
6.2266	65.4281	6.1876	73.657	6.3667	124.208	6.2074	389.08
6.208	65.5002	6.183	73.729	6.3577	123.565	6.1984	388.039
6.208	65.3873	6.1697	73.1251	6.3487	122.703	6.1897	391.531
6.1907	65.3615	6.1604	73.2984	6.3394	122.535	6.1804	390.782
6.1814	65.2787	6.1515	73.4731	6.3301	122.858	6.1622	390.026
6.1721	65.1304	6.1428	73.0453	6.3115	123.201	6.1536	388.654
6.1628	65.6309	6.1339	72.987	6.3029	121.828	6.1446	384.768
6.1538	65.462	6.1246	72.6473	6.2936	122.187	6.1357	384.632
6.1448	65.2361	6.1066	72.0942	6.2843	121.826	6.1267	382.069
6.1356	64.9986	6.0973	72.4347	6.2751	120.944	6.1174	380.998
6.1273	65.1051	6.0884	72.5195	6.2661	120.217	6.1081	383.585
6.109	65.3046	6.0801	72.3531	6.2568	119.966	6.0991	379.219
6.0997	64.2932	6.0709	71.6661	6.2468	120.705	6.0908	380.723
6.0908	64.7101	6.0616	71.8585	6.2379	121.1	6.0815	379.796
6.0815	64.5793	6.0522	71.428	6.2286	120.088	6.063	375.524
6.0729	65.028	6.0436	70.7634	6.2196	120.081	6.0547	376.141
6.0629	64.6823	6.0257	71.4737	6.2103	118.289	6.0457	377.781
6.0549	64.2277	6.0213	71.3994	6.201	119.321	6.0365	378.182
6.0456	64.3199	6.0074	70.6236	6.1827	119.318	6.0275	380.675
6.0364	64.1144	5.9982	71.7416	6.1737	119.295	6.0183	379.058
6.0274	64.2739	5.9899	70.6779	6.1644	118.361	6.0089	373.395
6.0184	64.3362	5.9809	71.257	6.1551	119.622	6.0003	366.134
5.9999	64.0922	5.9716	70.4806	6.1458	118.799	5.9917	370.472
5.9909	63.3823	5.9622	70.5444	6.1369	118.146	5.9731	373.08
5.9823	63.6079	5.9532	70.3147	6.1279	117.283	5.9644	371.323
5.9733	63.8522	5.94	70.4936	6.1186	116.373	5.9551	368.575
5.9643	63.4186	5.9353	70.5686	6.1093	116.568	5.9461	368.345
5.955	63.5159	5.9174	69.9551	6.1003	116.313	5.9375	368.137
5.9457	63.3668	5.9084	70.2544	6.091	115.662	5.9286	369.375
5.9364	63.2368	5.8991	69.9702	6.0817	115.216	5.9192	366.613
5.9191	63.4306	5.8905	69.7558	6.0718	116.084	5.9099	366.896
5.9098	63.1308	5.8812	70.0254	6.0536	115.324	5.9013	364.474
5.9009	62.6903	5.8726	69.945	6.0446	115.79	5.8927	362.781
5.8915	62.8509	5.8636	69.8721	6.0353	115.065	5.8834	362.287
5.8827	62.6318	5.8543	69.3763	6.026	113.504	5.8651	360.157
5.8734	62.6632	5.8451	69.2618	6.0167	115.532	5.8559	361.258
5.8647	62.6943	5.8318	69.145	6.0081	114.844	5.8473	358.709
5.8557	62.2293	5.8185	68.6384	5.9987	114.799	5.8386	358.734
5.8468	61.9985	5.8092	69.182	5.9894	113.369	5.8294	360.29
5.8379	62.4536	5.8002	68.7391	5.9802	113.882	5.82	359.293
5.8193	62.4922	5.791	68.4172	5.9712	113.787	5.8111	352.949
5.8113	62.6144	5.7823	68.7716	5.9618	113.345	5.8018	357.53
5.802	62.5483	5.7737	68.1046	5.9436	113.51	5.7932	352.42
5.7928	62.6256	5.7644	68.1254	5.9346	113.607	5.7845	357.695
5.7834	62.0843	5.7504	68.1543	5.9253	112.973	5.7659	352.024
5.7745	61.6603	5.7375	67.7034	5.916	112.794	5.757	353.531
5.7652	61.244	5.7285	67.6689	5.9067	112.601	5.7477	351.023
5.7562	61.3199	5.7192	67.5285	5.8977	111.743	5.7391	345.771
5.7479	61.0849	5.7102	67.2426	5.8887	112.586	5.7301	345.219
5.7386	61.1418	5.7013	67.6989	5.8794	111.842	5.7211	347.759
5.7293	61.4395	5.692	67.8845	5.8702	110.95	5.7121	344.022
5.7113	61.8256	5.6833	67.173	5.8608	110.964	5.7028	347.821
5.7024	61.5964	5.6744	67.5766	5.8523	110.488	5.6935	347.902
5.6934	61.4161	5.6654	67.7363	5.833	111.489	5.6763	344.62
5.6844	61.3162	5.6472	66.7682	5.8237	110.52	5.6763	342.637
5.6755	61.5582	5.6379	66.3606	5.8144	111.399	5.6577	345.516
5.6662	61.6407	5.6289	66.0333	5.8054	109.856	5.6487	342.735
5.6569	61.3284	5.6206	66.6819	5.7961	109.226	5.6395	344.85
5.6486	60.831	5.6113	66.6326	5.7868	109.179	5.6305	345.213
5.6304	60.8614	5.6021	65.9869	5.7779	109.465	5.6212	341.605
5.6304	60.3722	5.5927	66.034	5.7686	107.602	5.6123	341.052
5.6121	60.9646	5.5841	66.0294	5.7596	107.678	5.6034	338.365
5.6029	60.434	5.5751	66.1253	5.7503	109.637	5.5947	335.859
5.5949	60.4888	5.5662	65.7903	5.741	108.49	5.5858	337.462
5.5856	60.146	5.548	65.2091	5.723	108.287	5.5764	337.661
5.5763	60.4098	5.539	65.0685	5.7137	107.983	5.5579	336.535
5.567	59.9136	5.5304	65.2006	5.7044	106.931	5.5489	334.431
5.5577	60.5165	5.5214	65.3441	5.6951	107.705	5.5403	337.656
5.5498	60.3132	5.5121	65.5635	5.6861	107.356	5.5313	333.725
5.5312	60.5127	5.5027	64.4838	5.6772	106.94	5.5224	333.758
5.5222	59.7138	5.4941	64.5247	5.6679	107.419	5.5131	332.932
5.5132	59.2844	5.4848	65.1153	5.6586	106.218	5.5037	330.674
5.5039	58.9605	5.4759	64.9235	5.6493	106.055	5.4948	329.026
5.4956	59.7273	5.4582	64.756	5.6396	106.536	5.4858	330.035
5.4863	59.3232	5.4489	64.6342	5.6303	105.109	5.4719	329.096
5.477	58.9575	5.4396	63.9433	5.6118	105.732	5.4675	330.63
5.468	58.773	5.431	64.2332	5.6118	104.802	5.4499	327.436
5.459	59.039	5.4217	64.3845	5.5939	104.615	5.4406	325.827
5.4411	59.1573	5.4131	63.9836	5.5846	104.14	5.4313	326.23
5.4325	59.0454	5.4041	63.9763	5.5753	104.762	5.4223	325.273
5.4232	59.0642	5.3949	63.6047	5.566	103.361	5.4131	326.89
5.4139	59.0186	5.3856	64.0648	5.5567	104.25	5.4044	323.646
5.4046	59.013	5.3723	63.5368	5.548	104.693	5.3958	323.014
5.3957	58.3863	5.3684	63.2292	5.5388	103.831	5.3866	322.544
5.3874	58.3479	5.3498	62.9775	5.5294	104.264	5.3773	324.046
5.3781	58.3804	5.3408	63.0501	5.5201	101.533	5.3683	322.112
5.3691	58.5928	5.3319	62.8089	5.5021	102.71	5.3504	322.825
5.3599	58.7453	5.3229	62.2856	5.5021	103.421	5.3414	320.55
5.3416	58.1622	5.3143	62.1637	5.4836	102.199	5.3325	318.579
5.3333	57.9555	5.3049	62.0176	5.4746	102.474	5.3236	316.321
5.324	58.298	5.2957	62.4387	5.4653	102.223	5.3143	315.699
5.3148	57.8713	5.2867	62.5569	5.4559	101.691	5.3053	316.978
5.3061	57.5547	5.278	62.2182	5.447	100.402	5.297	316.344
5.2968	57.6941	5.2644	62.0346	5.4377	99.6754	5.2877	314.117
5.2875	58.0305	5.2511	61.7507	5.4288	101.385	5.2784	314.607
5.2782	57.4527	5.2418	61.6439	5.4194	100.317	5.2601	313.061
5.2692	57.6023	5.2325	61.8336	5.4101	100.249	5.2601	314.964
5.2599	57.1952	5.2239	61.6601	5.4008	100.398	5.2425	311.311
5.2426	57.089	5.2152	61.6399	5.3923	98.7789	5.2335	311.122
5.2333	57.1735	5.206	61.2978	5.3829	98.5122	5.2243	305.981
5.224	56.9414	5.1967	61.1534	5.373	99.1737	5.2149	309.083
5.2151	57.0748	5.1877	61.4054	5.3544	98.5231	5.2064	309.186
5.2061	57.1565	5.1787	60.9336	5.3454	99.2742	5.1977	306.189
5.1968	57.2311	5.1612	60.5034	5.3361	98.7991	5.1884	307.823
5.1882	56.7808	5.1519	60.8001	5.3268	99.3758	5.1791	306.837
5.1792	57.1302	5.1426	60.5737	5.3179	97.8043	5.1702	303.259
5.1703	56.9715	5.1333	60.5855	5.3086	97.7818	5.1523	302.119
5.1517	57.1909	5.125	60.2188	5.2996	96.3998	5.1437	302.192
5.1428	56.9201	5.116	60.028	5.2903	97.1459	5.1344	303.773
5.1335	56.276	5.1067	60.0898	5.281	96.9548	5.1254	303.205
5.1245	56.2331	5.0978	60.0062	5.272	97.8655	5.1161	300.347
5.1162	56.1568	5.0796	60.0163	5.263	97.5014	5.1072	299.799
5.107	56.322	5.0709	59.3355	5.2444	96.7585	5.0982	298.882
5.0976	56.1601	5.062	59.2083	5.2398	96.379	5.0896	298.745
5.0883	56.1754	5.0527	59.2876	5.2255	96.1624	5.0806	300.714
5.0797	56.0176	5.0436	59.549	5.2162	96.1645	5.0713	297.711
5.0704	55.9417	5.0347	58.5898	5.2069	95.1773	5.0531	293.417
5.0525	55.534	5.0211	59.5177	5.1979	95.2123	5.0447	294.673
5.0438	55.3469	5.0081	58.4196	5.1886	94.9365	5.0354	294.713
5.0345	55.1614	4.9988	58.6401	5.1793	94.7445	5.0261	294.429
5.0252	54.9865	4.9895	58.8612	5.1704	94.4843	5.0172	294.88
5.0166	55.1173	4.9802	58.4534	5.1611	95.6485	5.0078	292.071
5.008	54.9013	4.9716	58.5505	5.1518	94.1498	4.9992	293.064
4.9987	55.1121	4.963	58.2617	5.1428	94.3909	4.9902	292.828
4.9894	55.3504	4.9537	58.0905	5.1339	92.9932	4.9813	291.701
4.9805	55.341	4.9447	58.4232	5.1246	92.6805	4.9627	288.706
4.9668	55.339	4.9354	57.8268	5.1107	92.6613	4.9627	290.756
4.9539	55.2797	4.9262	57.486	5.0974	93.5866	4.9451	290.088
4.9446	55.2561	4.9132	57.7915	5.0881	92.2629	4.9362	285.935
4.9353	54.6595	4.8996	57.8136	5.0788	91.8888	4.9269	286.569
4.9261	54.7758	4.8903	57.4369	5.0695	92.1495	4.9183	285.036
4.9174	54.6862	4.8817	57.7434	5.0602	92.239	4.909	282.962
4.9082	54.6558	4.8727	57.5348	5.0512	91.3585	4.8997	284.836
4.8995	54.8176	4.8638	57.1777	5.0422	90.4286	4.8907	280.488
4.8906	54.7233	4.8548	57.1152	5.0329	90.8385	4.8824	283.087
4.8816	54.3747	4.8455	57.1813	5.0236	90.8718	4.8732	281.462
4.863	54.6623	4.8319	56.9763	5.0146	90.2256	4.8549	281.844
4.8544	54.1663	4.8273	57.0975	5.0053	90.7729	4.8456	279.799
4.8454	54.3923	4.8096	56.9485	4.996	90.949	4.837	277.938
4.8364	54.1506	4.8006	56.56	4.9781	90.0764	4.8284	280.006
4.8275	54.0473	4.7917	56.3319	4.9688	89.193	4.819	278.827
4.8182	53.5868	4.7824	56.0585	4.9588	90.2852	4.8097	277.939
4.8088	54.0964	4.7734	56.0873	4.9495	89.3591	4.8004	276.158
4.8009	53.7892	4.7644	56.3342	4.9402	89.0925	4.7918	277.523
4.7823	53.226	4.7558	56.5514	4.931	90.2127	4.7825	274.881
4.7823	53.5926	4.7465	56.1954	4.922	88.7655	4.7732	274.603
4.764	53.7941	4.7372	56.1223	4.913	89.1084	4.7553	271.561
4.7548	53.6156	4.724	55.9635	4.9037	88.757	4.7467	272.95
4.7465	53.2102	4.7107	56.128	4.8944	88.9154	4.7374	274.239
4.7375	53.4689	4.7018	55.7385	4.8855	88.7157	4.7284	273.927
4.7282	53.3078	4.6925	55.612	4.8672	87.9991	4.7192	270.289
4.7189	52.8522	4.6832	55.6493	4.8579	87.5724	4.7098	270.15
4.7099	52.7684	4.6742	55.5667	4.8486	88.0204	4.7009	267.19
4.7017	52.958	4.6656	55.2265	4.8397	88.2531	4.6923	265.997
4.6831	52.7758	4.6566	55.1454	4.8304	87.7332	4.6833	269.319
4.6745	52.9628	4.643	54.8329	4.821	86.4891	4.674	267.545
4.6652	52.7933	4.6384	54.7658	4.812	86.0369	4.6561	267.068
4.6559	52.771	4.6204	55.3234	4.8031	86.2973	4.6468	269.236
4.6476	52.5972	4.6115	54.8125	4.7938	87.2273	4.6375	264.351
4.6383	52.7226	4.6025	55.1898	4.7838	86.926	4.6283	263.984
4.6293	52.4479	4.5936	54.7041	4.7745	86.8738	4.6199	266.807
4.62	52.643	4.5842	55.0984	4.7606	85.601	4.6107	264.342
4.6107	52.2919	4.5753	54.5234	4.7563	85.2882	4.6017	261.386
4.5935	52.5053	4.5663	54.1865	4.738	85.5746	4.5927	261.301
4.5841	52.208	4.5577	53.7951	4.7287	85.4692	4.5744	260.692
4.5752	52.2055	4.5394	54.2611	4.7194	84.9281	4.5651	261.405
4.5659	52.2265	4.5347	54.456	4.7104	84.7043	4.5565	262.004
4.5566	52.2622	4.5208	53.7174	4.7012	85.0089	4.5475	259.244
4.5473	51.9597	4.5122	53.6338	4.6922	84.9367	4.5382	257.612
4.5393	52.3021	4.5035	54.186	4.6829	84.8279	4.5296	259.816
4.5301	51.8115	4.4943	53.4885	4.6739	84.7901	4.5203	258.71
4.5208	51.64	4.4853	53.2823	4.6646	84.8363	4.511	257.319
4.5118	51.5992	4.476	53.8337	4.6553	83.2486	4.502	258.474
4.4935	51.9513	4.4584	53.553	4.6461	82.9856	4.4937	256.704
4.4852	51.3751	4.4495	53.7268	4.6281	83.6224	4.4845	256.464
4.476	51.3077	4.4402	53.2466	4.6188	83.2927	4.4663	255.545
4.4671	51.2055	4.4312	53.3019	4.6095	83.275	4.4576	256.012
4.4577	51.3186	4.4223	52.8013	4.6002	82.4806	4.4484	254.917
4.4488	50.8429	4.4133	52.991	4.5913	82.2278	4.4397	255.416
4.4395	50.8873	4.4043	53.0237	4.5822	82.4828	4.4304	252.275
4.4302	50.9707	4.3954	52.7054	4.573	81.7076	4.4211	252.856
4.4209	50.9625	4.3864	52.9901	4.5636	81.8253	4.4118	251.913
4.4082	50.7931	4.3771	52.7326	4.5547	82.0202	4.4032	250.717
4.3943	50.2543	4.3679	52.4169	4.5447	81.885	4.3942	249.37
4.3854	50.3608	4.3505	52.7931	4.5354	81.7529	4.3853	248.669
4.3765	50.1918	4.3412	52.5292	4.5261	81.3735	4.3674	247.231
4.3672	50.3367	4.3319	52.4232	4.5171	81.7904	4.358	248.961
4.3578	50.6557	4.323	52.3986	4.4989	80.181	4.3487	248.318
4.3488	50.4569	4.314	51.95	4.4989	81.2545	4.3401	246.95
4.3402	50.3402	4.3047	51.5999	4.4802	81.3117	4.3311	246.172
4.3312	50.1556	4.2964	51.1327	4.471	81.314	4.3221	248.153
4.3223	50.2911	4.2871	51.7033	4.4624	80.4192	4.3132	243.558
4.3037	50.6917	4.2778	51.3851	4.4531	79.9664	4.3039	245.598
4.2944	49.9688	4.2645	51.5819	4.4438	80.4284	4.2853	244.62
4.2855	49.5369	4.2513	51.0196	4.4345	79.4106	4.2764	241.126
4.2765	49.3715	4.242	50.5949	4.4255	79.7392	4.2674	241.266
4.2679	49.1938	4.2331	50.9091	4.4162	78.3626	4.2585	242.784
4.2586	49.5727	4.2241	50.5791	4.4073	79.052	4.2495	240.726
4.2496	49.6751	4.2148	50.8722	4.398	79.4836	4.2406	239.51
4.2407	49.4594	4.2062	50.9144	4.3887	79.2322	4.2317	243.04
4.2267	49.5849	4.1972	50.5306	4.3697	78.7403	4.2224	240.277
4.2221	49.3121	4.188	50.5275	4.3604	78.3684	4.213	237.817
4.2048	49.3768	4.179	51.0416	4.3511	78.0896	4.2044	239.615
4.1955	49.356	4.1611	51.0879	4.3421	77.1958	4.1954	236.765
4.1866	49.227	4.1518	50.5952	4.3331	78.1541	4.1775	235.542
4.1773	48.938	4.1435	50.4736	4.3238	77.8912	4.1679	237.45
4.1683	48.9446	4.1342	50.499	4.3145	77.3182	4.1589	236.716
4.1601	48.9718	4.1248	50.5798	4.3052	77.4508	4.1497	240.44
4.1507	49.1551	4.1155	49.9999	4.2963	77.7098	4.141	236.453
4.1415	48.6385	4.1069	50.3587	4.2873	76.6526	4.1317	235.209
4.1232	48.6129	4.0982	50.3008	4.278	76.8823	4.1224	230.982
4.1189	48.5987	4.0889	50.0544	4.2595	76.2301	4.1131	235.037
4.1056	48.6872	4.0753	49.5605	4.2505	76.8525	4.1048	230.974
4.0966	48.4775	4.0614	50.1496	4.2412	76.7849	4.0958	230.867
4.0873	48.1647	4.0531	49.8666	4.2323	76.8264	4.0776	231.465
4.0783	48.0002	4.0442	49.6348	4.2229	75.4813	4.0683	232.582
4.069	47.783	4.0349	50.1735	4.214	75.5426	4.059	228.209
4.0607	47.912	4.0256	49.5057	4.2047	75.3568	4.0504	230.364
4.0515	48.316	4.017	48.8356	4.1954	75.24	4.041	231.254
4.0378	48.0642	3.9991	49.5646	4.1861	74.7372	4.0321	229.629
4.0242	47.9368	3.9901	48.9186	4.1682	75.1928	4.0232	230.424
4.0156	47.6366	3.9808	48.8858	4.1682	74.727	4.0146	228.506
4.0067	47.5208	3.9719	48.9179	4.1496	74.074	4.0053	227.843
3.9978	47.9953	3.9626	48.7551	4.1403	74.7859	3.996	227.223
3.9885	47.7286	3.954	48.913	4.1312	74.1752	3.9867	224.76
3.9792	46.9634	3.945	48.6073	4.1223	73.9156	3.9774	226.108
3.9699	47.1413	3.936	48.922	4.113	74.609	3.9601	223.455
3.9619	47.3556	3.9178	48.8766	4.1036	73.7802	3.9508	225.665
3.9526	47.0201	3.9088	48.4267	4.0947	73.7034	3.9419	224.114
3.9433	46.7588	3.8998	47.9123	4.0853	74.5061	3.9326	223.26
3.9297	47.0204	3.8912	48.0237	4.0764	73.2172	3.924	225.319
3.9158	46.977	3.8819	48.0306	4.0671	71.959	3.9154	223.821
3.9078	47.1165	3.8726	47.9782	4.0535	72.9572	3.9061	223.269
3.8985	46.9589	3.8636	48.0215	4.0489	73.3791	3.8967	222.036
3.8892	46.6787	3.8546	47.523	4.0302	73.2306	3.8878	223.542
3.8799	46.7881	3.846	47.7533	4.0213	73.4231	3.8698	219.588
3.8712	46.588	3.8324	47.7938	4.0124	73.3722	3.8698	221.132
3.8626	46.3738	3.8185	47.5996	4.0031	72.6493	3.8519	219.152
3.8533	46.6966	3.8095	47.8031	3.9938	71.7712	3.8429	218.465
3.8444	46.1978	3.8009	47.5185	3.9845	72.159	3.8336	219.336
3.8261	46.1557	3.7919	47.3281	3.9755	72.2394	3.8243	221.251
3.8215	46.059	3.7827	46.806	3.9666	71.4373	3.8157	215.635
3.8085	45.4297	3.7734	47.1442	3.9573	71.773	3.8071	215.288
3.7992	45.3235	3.7648	47.0852	3.9479	71.7779	3.7978	217.883
3.7903	45.6181	3.7558	46.4441	3.9387	72.4064	3.7888	219.349
3.7814	45.521	3.7465	47.0704	3.9297	72.0388	3.771	214.075
3.772	46.2212	3.7289	46.8567	3.9204	71.7601	3.7624	213.608
3.7631	45.5911	3.7197	46.6412	3.9021	71.4302	3.7531	217.506
3.7548	45.6891	3.7104	46.874	3.8931	71.4997	3.7438	216.865
3.7408	45.3014	3.7017	46.599	3.8838	70.725	3.7345	215.717
3.7362	45.0674	3.6931	46.2835	3.8745	69.7918	3.7255	213.141
3.718	44.9564	3.6838	46.9744	3.8652	70.048	3.7169	215.146
3.7091	44.8845	3.6748	46.4719	3.8565	70.5778	3.708	216.465
3.7004	44.9956	3.6655	46.0343	3.8472	70.4301	3.699	212.469
3.6911	44.8497	3.6475	45.8855	3.8379	69.7549	3.6897	212.097
3.6822	44.8276	3.6388	45.8072	3.8287	70.3357	3.6807	211.765
3.6729	44.487	3.6296	46.0445	3.8104	70.0867	3.6624	212.28
3.6639	44.4432	3.6203	45.5307	3.8014	69.7366	3.6538	210.383
3.6546	44.4302	3.6113	45.5145	3.7921	69.6195	3.6447	211.22
3.637	44.4622	3.6027	45.6916	3.7829	69.4135	3.6355	209.566
3.6276	44.3409	3.5937	45.3806	3.774	69.2786	3.6265	208.657
3.619	44.1841	3.5848	45.1936	3.7646	68.9652	3.6175	207.265
3.6097	43.9557	3.5662	45.4022	3.7553	69.6043	3.6086	208.904
3.6005	43.751	3.5573	45.5411	3.7464	69.2543	3.6	204.598
3.5912	44.1307	3.5487	45.4468	3.7374	68.2185	3.5907	208.982
3.5832	43.881	3.5397	44.9775	3.7281	67.5451	3.5721	209.857
3.5739	43.862	3.5304	44.8277	3.7188	68.3683	3.5638	206.567
3.5646	43.9894	3.5218	44.4749	3.7095	67.896	3.5549	206.905
3.5557	43.6575	3.5125	44.6905	3.6996	68.776	3.5456	204.527
3.5371	43.6849	3.5036	44.8792	3.6816	67.81	3.5367	205.171
3.5291	43.3698	3.486	44.314	3.6723	67.7078	3.5274	208.438
3.5192	43.0504	3.4767	44.6086	3.663	67.6556	3.5187	209.416
3.5106	43.0605	3.4674	44.5808	3.6537	67.7266	3.5101	207.488
3.5013	42.9511	3.4584	44.3586	3.6447	66.7933	3.5008	205.285
3.4927	42.9096	3.4494	44.1838	3.6354	66.7745	3.4915	204.265
3.4834	42.5045	3.4448	44.242	3.6264	65.7343	3.4736	202.334
3.4741	42.5478	3.4274	43.7689	3.6171	66.2518	3.4647	205.294
3.4648	42.9246	3.4185	43.852	3.6081	67.1895	3.4557	203.299
3.4568	43.1622	3.4092	43.9866	3.5988	67.0613	3.4467	204.243
3.4475	43.0454	3.3999	43.9041	3.5849	66.7679	3.4377	202.796
3.4289	42.736	3.3906	43.3805	3.5713	66.367	3.4284	201.074
3.4199	42.8614	3.382	43.128	3.5623	64.9218	3.4191	202.059
3.4106	42.3343	3.3734	43.359	3.5531	66.0545	3.4101	200.526
3.4023	42.7832	3.3548	43.6431	3.5438	65.6416	3.4015	200.665
3.3933	42.6433	3.3459	43.1695	3.5344	65.6667	3.3833	201.681
3.3841	42.2565	3.3372	43.0047	3.5258	65.2496	3.3833	201.182
3.3748	41.8918	3.3283	42.6538	3.5165	65.4181	3.3651	200.926
3.3659	41.7773	3.3194	42.985	3.5072	65.7734	3.3564	198.717
3.3482	42.117	3.3101	42.5628	3.4933	64.9818	3.3471	199.812
3.339	42.0018	3.3007	42.7429	3.4886	65.0527	3.3385	199.772
3.3299	41.5353	3.2924	42.6566	3.4707	65.8946	3.3292	195.918
3.3211	41.2299	3.2835	42.6398	3.4614	64.4701	3.32	196.757
3.3117	41.3321	3.2649	42.9748	3.4521	64.8166	3.311	198.791
3.3024	41.4107	3.2606	43.0168	3.4432	64.2653	3.3023	195.067
3.2941	41.5797	3.247	42.4646	3.4338	63.4786	3.2931	195.011
3.2852	41.3138	3.238	42.0402	3.4245	64.6389	3.2751	196.294
3.2759	41.0841	3.2294	41.9485	3.4156	64.1402	3.2662	195.526
3.2669	41.2367	3.2204	42.2124	3.4065	64.6983	3.2569	196.519
3.2493	40.5725	3.2111	41.7993	3.3973	64.3855	3.2479	196.291
3.2404	40.5067	3.2018	41.3261	3.388	63.4924	3.2386	194.539
3.2311	40.2657	3.1932	41.5894	3.3787	63.5787	3.2294	197.063
3.2219	41.1436	3.1795	42.0714	3.3694	63.0977	3.2201	194.271
3.2125	40.8377	3.1663	41.7022	3.3608	63.273	3.2118	193.231
3.2035	40.541	3.157	41.5164	3.3422	63.0549	3.2028	194.904
3.1953	40.5891	3.1477	41.4857	3.3329	63.5593	3.1935	191.258
3.1859	40.442	3.1391	41.2611	3.3239	63.2668	3.1755	190.004
3.1767	40.165	3.1304	41.0688	3.3147	63.4534	3.1755	191.303
3.1587	39.7627	3.1211	41.0366	3.3057	62.8831	3.1573	191.597
3.1587	39.8597	3.1118	40.9458	3.2964	63.218	3.1487	191.12
3.1411	39.514	3.1029	40.9173	3.2874	62.9683	3.1397	190.352
3.1318	39.0947	3.0937	40.751	3.2781	62.2571	3.1304	190.195
3.1226	39.3199	3.0764	40.9205	3.2689	62.795	3.1211	190.734
3.1136	39.1279	3.0671	40.8941	3.2596	62.2985	3.1121	190.347
3.1046	39.1557	3.0578	40.5691	3.2506	61.8799	3.1028	189.999
3.0961	39.2536	3.0488	40.3342	3.2417	61.9523	3.0936	189.578
3.0868	39.3618	3.0402	40.4511	3.2277	62.3103	3.0847	191.262
3.0781	39.0673	3.031	40.35	3.2137	62.7555	3.076	189.956
3.0595	39.2047	3.022	40.4939	3.2047	61.3315	3.0578	189.608
3.0502	38.7645	3.013	40.4236	3.1957	61.2165	3.0492	189.472
3.0423	38.9165	2.9948	40.2835	3.1864	61.5313	3.0399	188.327
3.033	38.5245	2.9905	39.8401	3.1771	61.0643	3.0306	187.871
3.0237	38.793	2.9771	39.7971	3.1682	61.2043	3.0217	184.839
3.0148	38.5708	2.9681	39.7017	3.1588	60.2306	3.013	189.449
3.0055	38.1686	2.9588	39.8056	3.1499	60.7197	3.0041	187.749
2.9972	38.6743	2.9496	39.469	3.1406	60.9467	2.9948	186.796
2.9882	38.3338	2.9406	39.0275	3.1313	61.1987	2.9858	187.018
2.9695	37.8381	2.9317	39.2502	3.1223	61.1727	2.9678	186.925
2.9695	37.7322	2.923	39.2962	3.113	60.153	2.9591	187.824
2.9513	37.5684	2.9094	38.9409	3.0938	60.6736	2.9499	184.357
2.943	37.5113	2.8954	39.1085	3.0846	60.188	2.9406	185.162
2.9337	37.7404	2.8868	38.7283	3.0759	60.7716	2.9313	183.782
2.9245	37.5725	2.8779	39.2487	3.0666	59.7031	2.9227	185.403
2.9155	37.5692	2.869	39.0816	3.0573	59.7108	2.9141	184.492
2.9064	37.1689	2.8597	38.4903	3.048	60.34	2.9047	181.375
2.8972	37.1612	2.8508	38.5635	3.0387	59.9005	2.8865	183.457
2.8888	37.2596	2.8418	38.5506	3.0297	60.4118	2.8865	183.307
2.8706	37.3956	2.8328	38.3706	3.0208	59.837	2.8686	183.873
2.8613	37.018	2.8242	38.3653	3.0115	58.9015	2.86	182.332
2.8525	36.5922	2.806	38.1248	3.0021	58.6038	2.8507	181.77
2.8438	36.7323	2.7967	38.0639	2.9839	58.6754	2.8418	182.129
2.8349	36.9533	2.7877	37.9538	2.9796	59.5079	2.8325	182.291
2.8259	36.7265	2.7787	37.7835	2.9656	58.6932	2.8235	181.952
2.8166	36.498	2.7698	37.5967	2.9566	58.167	2.8145	182.464
2.8073	36.3646	2.7612	37.3308	2.9473	58.1596	2.8056	180.253
2.798	36.1007	2.7518	37.4953	2.938	58.7753	2.797	179.633
2.7808	36.0758	2.7425	37.5395	2.9287	58.6633	2.7784	179.29
2.7716	35.9042	2.7252	37.199	2.9198	57.1906	2.7694	179.378
2.7622	35.5079	2.7159	36.7557	2.9108	57.426	2.7611	178.017
2.7532	35.6061	2.7066	36.8886	2.9015	57.1273	2.7518	178.835
2.7445	35.6372	2.6973	36.8804	2.8922	57.9775	2.7425	178.788
2.7356	35.485	2.6884	37.2012	2.8829	57.5795	2.7335	178.205
2.7266	35.3771	2.6794	36.9639	2.865	57.7471	2.7242	179.233
2.7173	35.5936	2.6708	36.6585	2.865	58.1096	2.7155	178.43
2.699	35.2962	2.6618	36.5326	2.8464	57.2184	2.7066	177.985
2.699	35.0913	2.6525	36.5939	2.8375	56.8054	2.6977	176.978
2.6815	35.304	2.6393	36.3773	2.8282	57.1288	2.6884	177.492
2.6722	34.6864	2.6257	36.179	2.8189	56.6526	2.6705	176.857
2.6636	34.4766	2.6167	36.1748	2.8099	56.1416	2.6619	174.09
2.6543	34.3843	2.6075	36.1887	2.8006	57.0469	2.6525	174.902
2.645	34.4444	2.5989	36.0127	2.7917	56.4155	2.6433	173.353
2.6367	34.219	2.5895	36.1634	2.7824	56.5164	2.6347	176.85
2.6278	34.5663	2.5806	35.7758	2.7731	56.6333	2.6254	176.649
2.6185	34.5439	2.572	35.9059	2.7638	55.849	2.6161	172.887
2.6092	34.1522	2.5626	35.4678	2.7551	55.2306	2.6068	175.422
2.591	34.1641	2.5537	35.2903	2.7364	56.3146	2.5979	173.416
2.5817	33.6705	2.5354	35.3749	2.7318	55.9771	2.5885	174.956
2.5737	33.5783	2.5265	35.4182	2.7182	55.4311	2.5706	173.413
2.5644	33.5496	2.5178	35.4799	2.7088	56.1472	2.562	174.562
2.5552	33.6135	2.5088	35.3303	2.6999	56.049	2.5527	172.497
2.5459	33.2212	2.4995	34.9478	2.6906	55.1536	2.5437	171.844
2.5369	32.8884	2.4902	34.8468	2.6813	54.7953	2.5348	171.866
2.528	33.0481	2.4816	34.9152	2.6723	55.0357	2.5255	171.426
2.5099	32.7013	2.4723	34.5458	2.663	54.5754	2.5161	172.139
2.501	32.637	2.4637	34.7181	2.6537	54.5101	2.5069	172.639
2.492	32.5115	2.4501	34.0162	2.6402	55.3805	2.4976	172.149
2.4827	32.3351	2.4455	34.3113	2.6359	55.1403	2.4893	172.189
2.4734	32.3812	2.4276	33.8006	2.6172	54.2185	2.471	171.657
2.4645	32.4153	2.4189	33.6525	2.608	54.4916	2.4621	168.915
2.4555	32.3401	2.4097	33.8817	2.599	55.4766	2.4531	171.171
2.4469	31.9367	2.4004	33.9566	2.5901	54.464	2.4438	169.918
2.438	31.9041	2.3914	33.4481	2.5808	54.3903	2.4345	169.027
2.4287	31.527	2.3822	34.0746	2.5715	54.1672	2.4259	167.196
2.4101	31.7326	2.3735	33.712	2.5622	53.5294	2.4169	169.165
2.4015	31.7825	2.3646	33.3811	2.5532	53.7432	2.408	168.202
2.3929	31.7204	2.3466	33.0173	2.5442	53.2952	2.399	167.925
2.3836	31.4242	2.3419	33.1631	2.5349	54.0155	2.3897	166.549
2.3743	31.5435	2.3284	33.2353	2.5256	53.0165	2.3718	167.823
2.3657	31.0189	2.3197	33.0785	2.5072	52.2552	2.3632	167.847
2.3563	30.6709	2.3108	33.13	2.5072	53.4092	2.3539	168.729
2.3471	30.8299	2.3015	33.022	2.489	52.8674	2.3446	166.912
2.3388	30.8039	2.2921	32.7772	2.4797	52.5596	2.3357	167.011
2.3298	30.6516	2.2832	32.7095	2.4708	52.7711	2.3271	165.501
2.3205	30.6855	2.2742	32.4311	2.4615	52.4527	2.3178	168.674
2.3022	30.4925	2.2612	32.0965	2.4522	53.2367	2.3088	164.967
2.2932	29.9499	2.2566	32.3845	2.4429	52.3968	2.2999	167.302
2.2846	30.0846	2.2381	32.3067	2.4342	52.0727	2.2815	165.338
2.2756	29.8637	2.2294	31.4811	2.4249	52.4691	2.2722	163.969
2.2664	29.9083	2.2204	31.809	2.4156	51.7995	2.2636	164.234
2.257	29.6308	2.2115	31.6687	2.4064	51.9715	2.2546	164.123
2.2478	29.3359	2.2022	31.3836	2.3928	52.4616	2.2456	162.56
2.2398	29.6587	2.1932	31.6107	2.3791	51.3015	2.2367	163.072
2.2305	29.4419	2.18	31.0688	2.3698	51.6899	2.2274	165.602
2.2213	29.59	2.1754	31.326	2.3605	52.2488	2.2181	164.046
2.203	29.1325	2.1574	31.1434	2.3516	51.8525	2.2092	164.919
2.194	29.2251	2.1481	31.0709	2.3423	51.6194	2.2009	163.365
2.1848	28.9572	2.1392	30.7565	2.333	51.3498	2.1823	164.064
2.1765	28.7449	2.1299	30.4391	2.324	51.4777	2.1734	164.16
2.1672	28.3262	2.1213	30.3944	2.3151	50.664	2.1648	164.121
2.1582	28.533	2.1123	30.6543	2.3058	51.0947	2.1555	161.724
2.149	27.9115	2.1033	29.9641	2.2964	51.2629	2.1468	160.454
2.14	27.7065	2.0944	30.0904	2.2828	50.4127	2.1372	161.306
2.1307	27.975	2.0851	30.0074	2.2691	50.1977	2.1283	162.192
2.1134	27.7424	2.0718	29.6458	2.2598	49.6463	2.119	158.884
2.1041	27.7728	2.0585	30.0078	2.2506	50.0503	2.11	160.925
2.0949	27.4784	2.0492	29.8294	2.2412	49.9722	2.101	158.522
2.0856	27.5916	2.0399	29.3819	2.2323	50.0754	2.0918	156.933
2.0776	27.0686	2.0309	29.7728	2.2233	50.2361	2.0745	157.848
2.0683	27.2614	2.022	29.1726	2.214	49.7817	2.0652	160.09
2.059	27.055	2.0134	28.9487	2.2047	49.7564	2.0558	157.85
2.05	26.8859	2.0044	28.7893	2.1957	49.4889	2.0465	157.337
2.036	26.7052	1.9951	28.9702	2.1864	49.0231	2.0376	156.154
2.0224	26.5684	1.9858	28.754	2.1772	49.1997	2.029	159.389
2.0135	26.4777	1.9682	28.9109	2.1682	49.549	2.02	155.686
2.0049	26.5554	1.9593	28.4789	2.149	48.1898	2.0111	155.005
1.9956	26.0676	1.95	28.1104	2.14	47.8263	1.9925	155.501
1.9866	25.708	1.9411	27.9612	2.1307	47.6689	1.9836	157.768
1.9776	25.6229	1.9321	28.1173	2.1214	47.8764	1.9749	155.225
1.9684	25.5555	1.9232	28.0827	2.1121	48.8799	1.966	153.723
1.9591	25.5117	1.9142	27.7979	2.1035	48.5068	1.9567	153.888
1.9512	25.4659	1.9053	27.6169	2.0942	47.4978	1.9481	154.711
1.9326	24.8324	1.887	27.4366	2.0849	48.0046	1.9388	153.07
1.928	25.0551	1.8777	26.9586	2.0756	48.4332	1.9295	155.28
1.9144	24.7994	1.8691	27.1559	2.0573	47.9422	1.9119	154.68
1.906	24.865	1.8604	27.0951	2.0573	47.828	1.9029	153.089
1.8968	24.7319	1.8511	26.8216	2.039	47.1886	1.8937	155.375
1.8878	24.9436	1.8422	26.3739	2.0297	46.5575	1.8844	154.419
1.8785	24.5084	1.8328	26.3744	2.0207	46.0722	1.8754	153.991
1.8692	24.2166	1.8235	26.2689	2.0114	46.1686	1.8668	152.063
1.8603	23.9379	1.8148	26.4486	2.0022	46.2475	1.8578	152.27
1.8513	23.9691	1.8016	25.5487	1.9932	46.5785	1.8488	152.218
1.8334	23.7706	1.7876	25.9641	1.9842	46.2594	1.8396	150.142
1.8248	23.7453	1.7787	25.8508	1.9749	45.8032	1.8302	149.889
1.8154	23.4239	1.7698	25.4796	1.9656	47.6992	1.8123	149.021
1.8061	23.5433	1.7608	25.5824	1.9563	46.1218	1.803	150.238
1.7968	23.1317	1.7522	25.4188	1.9474	46.403	1.7937	148.671
1.7885	22.9276	1.7429	25.5442	1.9291	45.6038	1.7848	148.682
1.7796	22.688	1.7336	25.3641	1.9198	45.5563	1.7765	149.382
1.7703	22.8457	1.7207	24.8957	1.9105	45.594	1.7672	147.739
1.761	22.903	1.7071	24.4635	1.9016	45.4448	1.7579	147.06
1.7428	22.516	1.6978	24.2208	1.8923	45.1542	1.7489	145.58
1.7428	22.2687	1.6889	24.2692	1.8833	45.1862	1.7396	148.494
1.7255	22.351	1.6799	24.3545	1.874	44.9641	1.7303	145.097
1.7163	21.9647	1.6706	24.4653	1.8651	44.5351	1.7132	145.742
1.707	22.0795	1.6616	23.8758	1.8557	44.2684	1.7038	143.246
1.6977	21.7709	1.653	23.5983	1.8465	43.9584	1.6945	147.19
1.689	21.7054	1.6394	23.0956	1.8328	44.2951	1.6856	146.02
1.6798	21.4656	1.6255	24.0093	1.8191	43.8597	1.6766	142.459
1.6711	21.3988	1.6168	23.2506	1.8098	43.3654	1.6673	144.533
1.6622	21.4465	1.6076	23.0554	1.8006	43.4665	1.658	144.717
1.6439	20.8946	1.5989	22.498	1.7912	44.2839	1.6494	144.249
1.6393	20.8779	1.5899	22.7291	1.7826	43.3856	1.6405	144.496
1.6254	20.6519	1.5806	22.8091	1.7733	43.7596	1.6315	141.679
1.6164	20.3982	1.5713	22.569	1.764	42.5521	1.6222	143.182
1.6072	20.4643	1.5581	22.1146	1.7547	42.6157	1.6039	139.112
1.5981	20.2611	1.5541	21.9091	1.7458	42.4683	1.595	140.788
1.5898	19.8559	1.5355	21.9455	1.7364	41.3364	1.586	141.043
1.5805	19.7993	1.5262	21.9327	1.7228	42.4903	1.5774	141.647
1.5712	19.6713	1.5176	21.5866	1.7182	42.0088	1.5681	139.661
1.5622	19.4957	1.5086	21.207	1.6999	41.9902	1.5591	137.582
1.5533	19.296	1.4996	21.1633	1.6906	41.8895	1.5498	139.257
1.5354	19.1798	1.4907	21.1497	1.6814	41.2946	1.5409	140.141
1.5264	18.7997	1.4818	20.8563	1.6724	41.6891	1.5319	136.145
1.5175	18.9162	1.4725	20.9486	1.6635	41.0046	1.5229	137.63
1.5082	18.5624	1.4549	20.6041	1.6541	40.5043	1.505	133.796
1.4989	18.7571	1.4456	20.7167	1.6448	40.6067	1.4957	137.466
1.49	18.5638	1.4367	20.4411	1.6355	40.4343	1.4868	135.743
1.4807	18.3081	1.4277	20.1753	1.6266	40.319	1.4785	133.6
1.4717	18.4138	1.4184	20.1705	1.6176	39.8059	1.4692	133.352
1.4624	17.7976	1.4095	19.627	1.6083	39.1428	1.4599	133.776
1.4538	17.9044	1.3965	19.744	1.59	38.7409	1.451	132.535
1.4356	17.5846	1.3919	19.8621	1.5806	39.6773	1.4417	131.772
1.4266	17.4764	1.3732	19.2373	1.5714	38.3648	1.4331	130.599
1.4177	17.1073	1.3645	19.1847	1.5624	38.6754	1.4151	129.63
1.4084	17.0268	1.3553	18.7008	1.5531	38.2516	1.4059	131.176
1.3998	17.0567	1.3466	18.6215	1.5441	37.7657	1.3966	131.358
1.3911	16.7922	1.3377	18.4275	1.5348	38.55	1.388	131.354
1.3819	16.8356	1.3284	18.4569	1.5255	37.7451	1.3793	128.273
1.3725	16.772	1.3147	18.5833	1.5162	37.2425	1.37	127.082
1.3631	16.4264	1.3018	18.2576	1.5076	37.7005	1.3606	125.858
1.3542	16.5825	1.2926	17.9946	1.4937	37.6657	1.3521	126.347
1.3366	16.3519	1.2833	17.651	1.4798	37.21	1.3337	128.315
1.3276	16.3914	1.2743	17.3949	1.4708	36.2472	1.3337	126.324
1.3184	16.0474	1.2654	17.3061	1.4619	36.0383	1.3158	123.158
1.3091	15.7492	1.2565	17.3574	1.4526	36.7829	1.3069	122.38
1.3008	15.5827	1.2475	16.9234	1.4432	36.3055	1.2976	122.759
1.2919	15.2705	1.2339	16.5116	1.434	35.7238	1.2886	122.645
1.2826	15.5139	1.2203	16.5403	1.425	35.3245	1.2797	120.189
1.2733	15.1379	1.2117	16.1552	1.4157	35.5745	1.2711	120.864
1.264	14.9448	1.2024	16.1476	1.4067	35.1468	1.2622	119.648
1.2468	14.9531	1.1937	15.8311	1.3974	34.364	1.2529	119.173
1.2375	14.7273	1.1845	15.728	1.3838	34.3191	1.235	118.079
1.2286	14.299	1.1755	15.7338	1.3698	34.8072	1.2264	116.841
1.2195	14.1689	1.1662	15.5533	1.3604	34.5156	1.2171	116.181
1.2103	14.2801	1.1573	15.7178	1.3518	33.4883	1.2078	115.54
1.201	13.5768	1.1487	15.2724	1.3425	33.9711	1.1985	114.226
1.1927	13.9794	1.1396	15.1908	1.3332	34.0502	1.1895	115.493
1.1838	13.5201	1.1256	14.6967	1.3239	33.056	1.1809	112.898
1.1744	13.5333	1.1117	14.7919	1.3146	32.4112	1.1719	111.122
1.1652	13.4134	1.1035	14.234	1.3057	32.3621	1.1537	108.048
1.1479	13.066	1.0945	14.3171	1.2967	31.9303	1.1446	107.564
1.1385	13.0402	1.0852	13.9243	1.2874	32.7689	1.1353	108.863
1.1296	12.8463	1.0762	13.7338	1.2781	31.5316	1.1267	106.543
1.1203	12.7226	1.0673	13.7308	1.2691	31.8607	1.1178	108.024
1.111	12.5686	1.0584	13.5641	1.2506	31.0194	1.1085	107.257
1.1017	12.1938	1.0451	13.7945	1.2416	31.3426	1.0999	104.812
1.0938	12.0169	1.0312	12.9572	1.2327	31.7817	1.0906	103.992
1.0845	11.863	1.0222	13.0074	1.2233	30.2798	1.0724	102.918
1.0752	11.6429	1.0132	12.7365	1.214	30.2336	1.0641	101.946
1.057	11.7339	1.0043	12.5503	1.2047	29.936	1.0548	101.344
1.057	11.509	0.9953	12.6448	1.1954	29.6776	1.0455	98.1812
1.0397	11.2955	0.9867	12.1196	1.1868	29.2971	1.0362	97.151
1.0305	11.2523	0.9682	12.0847	1.1775	29.4374	1.0273	97.7055
1.0212	11.3758	0.9592	11.8654	1.1682	29.4049	1.0187	96.9261
1.0122	10.9429	0.9502	11.7043	1.159	28.4372	1.0097	96.1434
1.003	10.7568	0.9416	11.5116	1.1499	28.0322	1.0007	96.2872
0.9947	10.619	0.9323	11.1305	1.1363	27.8063	0.9822	92.7059
0.9854	10.7045	0.923	10.873	1.1224	27.9064	0.9732	91.536
0.9764	10.2107	0.914	10.8967	1.1134	27.4217	0.9643	89.9639
0.9581	10.2021	0.905	10.7345	1.1041	26.4687	0.955	89.8017
0.9488	10.0607	0.8874	10.2734	1.0948	26.6261	0.9457	88.4003
0.9406	9.77519	0.8828	10.6647	1.0858	26.5234	0.937	89.1288
0.9316	9.49631	0.8689	10.1634	1.0766	26.4586	0.9284	87.0564
0.9223	9.54378	0.8596	9.84502	1.0676	26.1028	0.9191	85.6517
0.913	9.20404	0.8513	9.93974	1.0583	25.7889	0.9144	84.3928
0.904	9.14828	0.8423	9.51104	1.0443	25.2813	0.8965	82.7283
0.8947	8.85894	0.8331	9.2755	1.0311	24.7411	0.8872	80.8012
0.8858	8.74608	0.8241	9.16811	1.0218	25.0203	0.8789	80.923
0.8682	8.50398	0.8151	8.87803	1.0125	24.4328	0.87	80.7311
0.8589	8.55358	0.8015	8.74653	1.0032	23.5427	0.8607	79.6095
0.8496	8.45956	0.7883	8.82177	0.9942	23.1333	0.8517	77.5798
0.8406	8.20157	0.7793	8.63411	0.985	23.303	0.8424	77.1405
0.8317	8.29707	0.77	8.09274	0.976	23.0428	0.8245	74.6577
0.823	8.22975	0.7607	8.13409	0.9667	22.7186	0.8159	72.4099
0.8138	8.17243	0.7521	7.50563	0.9568	22.3632	0.8066	72.236
0.8051	7.98258	0.7431	8.00692	0.9474	21.5764	0.7974	69.7433
0.8005	7.83038	0.7342	7.68878	0.9338	21.697	0.7884	70.1622
0.7827	7.93407	0.7206	7.10147	0.9292	21.5412	0.7794	68.9519
0.7734	7.32595	0.7067	7.24167	0.9108	21.369	0.7705	67.1302
0.7641	7.17766	0.698	6.80785	0.9018	21.1018	0.7615	67.0492
0.7551	7.3108	0.6894	7.30939	0.8925	20.8813	0.7525	65.5849
0.7468	7.07748	0.68	6.67252	0.8832	20.0355	0.7436	64.2598
0.7332	7.35049	0.6708	6.37073	0.8739	19.8072	0.725	63.4791
0.7193	6.74094	0.6618	6.33913	0.8649	18.8729	0.7164	60.0802
0.71	6.24879	0.6525	6.09303	0.856	18.8013	0.7078	60.3896
0.7007	6.19067	0.6439	5.90905	0.8467	19.2577	0.6985	59.8437
0.6917	5.85075	0.626	5.73154	0.8374	17.5357	0.6895	57.0572
0.6834	6.12841	0.6167	6.19578	0.8281	18.4326	0.6801	56.6653
0.6741	5.92129	0.6077	5.38527	0.8191	16.9776	0.6715	55.1241
0.6648	5.73545	0.5991	5.29998	0.8098	17.3748	0.6629	54.8776
0.6562	5.66672	0.5901	5.26733	0.8009	16.5982	0.6536	53.0034
0.6469	5.59151	0.5808	5.40586	0.783	16.2864	0.635	51.0539
0.6293	5.18251	0.5719	5.16814	0.774	16.2187	0.6258	52.1659
0.6203	5.10515	0.563	4.8235	0.765	15.4738	0.6174	49.4387
0.611	5.07518	0.5537	4.81904	0.7561	15.4446	0.6085	48.0696
0.6017	4.86848	0.5361	4.2776	0.7468	15.2159	0.5992	45.6691
0.5928	4.69858	0.5271	4.05581	0.7375	15.5956	0.5902	43.793
0.5842	4.61787	0.5179	4.33957	0.7282	15.4011	0.5813	43.8394
0.5752	4.38891	0.5086	3.41039	0.7189	13.9134	0.572	42.7097
0.566	4.29153	0.5	3.8544	0.7106	14.4947	0.5631	41.5445
0.5477	4.18151	0.4907	3.67266	0.697	13.8688	0.5544	39.6101
0.5477	3.90227	0.482	3.45214	0.6924	13.3997	0.5362	39.1272
0.5305	3.8121	0.4731	3.19461	0.6743	13.0266	0.5273	38.899
0.5212	3.68062	0.4638	3.22873	0.665	13.2256	0.5184	37.5932
0.5119	3.54439	0.45	2.77866	0.6557	12.4967	0.5094	35.1859
0.5026	3.40586	0.4371	2.67845	0.6467	12.139	0.5004	35.5478
0.4937	3.58232	0.4278	2.97067	0.6374	12.1966	0.4914	35.001
0.4854	3.59378	0.4185	2.5442	0.6281	11.9522	0.4822	33.3785
0.4761	3.06552	0.4093	2.5142	0.6198	10.8003	0.4728	31.0488
0.4671	3.38368	0.4006	2.42677	0.6109	10.5381	0.4555	30.2629
0.4488	2.89369	0.3917	2.16697	0.6016	10.4028	0.4462	28.45
0.4395	2.92368	0.3871	1.90785	0.5923	10.4898	0.4369	27.428
0.4312	2.90824	0.3695	1.98529	0.5744	9.76648	0.4279	24.6647
0.4219	2.85811	0.3605	1.56022	0.5698	9.24011	0.4187	26.182
0.4126	2.96263	0.3512	1.59871	0.5561	9.25741	0.4097	23.8349
0.4037	3.04821	0.3427	1.48262	0.5472	8.87918	0.4008	25.4791
0.3947	2.80222	0.3337	1.93093	0.5385	8.9387	0.3921	24.8114
0.3862	2.40566	0.3248	1.62183	0.5292	8.30235	0.3829	20.9907
0.3768	2.19631	0.3155	1.39973	0.5199	8.50236	0.3647	20.1171
0.3589	1.94435	0.2972	1.20208	0.5109	8.12893	0.3557	21.3305
0.3496	1.74708	0.2886	1.10045	0.5017	7.39895	0.3464	17.0991
0.3404	1.59479	0.2796	0.78036	0.4927	7.55241	0.3371	17.8857
0.3324	1.03353	0.2703	1.27613	0.484	7.32487	0.3279	16.3629
0.3231	1.9151	0.2617	0.71363	0.4658	6.83405	0.3192	16.5059
0.3138	1.79544	0.2524	0.3518	0.4564	5.82065	0.3102	13.2325
0.3046	1.60396	0.2432	0.67707	0.4474	6.34479	0.3013	14.4725
0.2956	1.58456	0.2345	0.74384	0.4388	6.00887	0.2923	12.0318
0.2863	1.30697	0.2258	0.46311	0.4299	5.68415	0.283	12.2119
0.278	1.29992	0.2072	0.11962	0.4206	5.26055	0.2648	11.8007
0.2691	1.41026	0.1983	0.18616	0.4119	5.15289	0.2559	10.8087
0.2505	1.512	0.1893	0.55345	0.4026	4.83179	0.2466	10.7884
0.2415	0.92622	0.1807	0.03615	0.3933	4.46468	0.238	11.0871
0.2333	0.64127	0.1714	-0.24458	0.3847	3.98915	0.2286	10.8106
0.2238	0.8579	0.1625	-0.24238	0.3668	3.65955	0.22	10.3348
0.2146	0.69349	0.1532	-0.03849	0.3575	3.3337	0.2107	9.06039
0.2056	0.35286	0.1439	0.09448	0.3482	3.0924	0.2014	7.27045
0.1967	0.64805	0.1356	-0.39103	0.3392	2.88368	0.1921	6.28065
0.1874	0.38845	0.122	-0.26272	0.3302	3.50858	0.1745	6.19283
0.1698	0.6132	0.1081	-0.70094	0.3216	3.12352	0.1655	6.26006
0.1698	0.54489	0.0991	-0.17574	0.3127	2.71217	0.1566	5.85573
0.1516	0.35466	0.0905	-0.46202	0.3034	2.57435	0.1477	6.08075
0.1423	0.46885	0.0812	-0.6296	0.2941	2.7757	0.1384	4.16956
0.1333	0.81735	0.0726	-0.54858	0.2765	1.52521	0.1291	4.72266
0.124	0.62138	0.0633	-0.86914	0.2765	1.53216	0.1205	4.93255
0.1158	0.48164	0.0543	-0.74594	0.2582	1.88868	0.1119	3.29532
0.1068	0.32611	0.0411	-0.61146	0.2493	1.97652	0.1026	4.35351
0.0976	0.41124	0.0275	-0.50046	0.2403	1.09713	0.0843	4.47664
0.0883	0.31126	0.0185	-1.01568	0.231	1.44039	0.0754	4.61584
0.0789	0.0408	0.0092	-0.86036	0.2219	0.80634	0.0664	4.45842
0.0617	0.35223	0.0002	-8.26282e-05	0.2133	0.54628	0.0578	3.57731
0.0518	0.34039	-0.0002	-8.26282e-05	0.204	1.00262	0.0485	4.79376
0.0432	0.34517	-0.0092	-0.86036	0.1951	0.97529	0.0392	3.58125
0.0345	0.2772	-0.0185	-1.01568	0.1768	0.57117	0.03	4.28023
0.0252	0.12746	-0.0275	-0.50046	0.1678	0.69721	0.0213	4.73188
0.0159	-0.20211	-0.0411	-0.61146	0.1592	0.75624	0.0124	2.02219
0.0067	-3.74316e-05	-0.0543	-0.74594	0.1502	0.29378	0.0034	-0.000112108
-0.0067	-3.74316e-05	-0.0633	-0.86914	0.1409	0.1743	-0.0034	-0.000112108
-0.0159	-0.20211	-0.0726	-0.54858	0.1316	-0.15706	-0.0124	2.02219
-0.0252	0.12746	-0.0812	-0.6296	0.123	-0.45219	-0.0213	4.73188
-0.0345	0.2772	-0.0905	-0.46202	0.1144	0.38181	-0.03	4.28023
-0.0432	0.34517	-0.0991	-0.17574	0.1051	0.17061	-0.0392	3.58125
-0.0518	0.34039	-0.1081	-0.70094	0.0865	0.0224	-0.0485	4.79376
-0.0617	0.35223	-0.122	-0.26272	0.0776	-0.61663	-0.0578	3.57731
-0.0789	0.0408	-0.1356	-0.39103	0.0689	-1.45329	-0.0664	4.45842
-0.0883	0.31126	-0.1439	0.09448	0.0599	-0.69748	-0.0754	4.61584
-0.0976	0.41124	-0.1532	-0.03849	0.051	-0.26992	-0.0843	4.47664
-0.1068	0.32611	-0.1625	-0.24238	0.0417	-0.74426	-0.1026	4.35351
-0.1158	0.48164	-0.1714	-0.24458	0.0328	-0.43507	-0.1119	3.29532
-0.124	0.62138	-0.1807	0.03615	0.0241	0.12435	-0.1205	4.93255
-0.1333	0.81735	-0.1893	0.55345	0.0151	-0.07743	-0.1291	4.72266
-0.1423	0.46885	-0.1983	0.18616	0.0059	-2.04223e-05	-0.1384	4.16956
-0.1516	0.35466	-0.2072	0.11962	-0.0059	-2.04223e-05	-0.1477	6.08075
-0.1698	0.54489	-0.2258	0.46311	-0.0151	-0.07743	-0.1566	5.85573
-0.1698	0.6132	-0.2345	0.74384	-0.0241	0.12435	-0.1655	6.26006
-0.1874	0.38845	-0.2432	0.67707	-0.0328	-0.43507	-0.1745	6.19283
-0.1967	0.64805	-0.2524	0.3518	-0.0417	-0.74426	-0.1921	6.28065
-0.2056	0.35286	-0.2617	0.71363	-0.051	-0.26992	-0.2014	7.27045
-0.2146	0.69349	-0.2703	1.27613	-0.0599	-0.69748	-0.2107	9.06039
-0.2238	0.8579	-0.2796	0.78036	-0.0689	-1.45329	-0.22	10.3348
-0.2333	0.64127	-0.2886	1.10045	-0.0776	-0.61663	-0.2286	10.8106
-0.2415	0.92622	-0.2972	1.20208	-0.0865	0.0224	-0.238	11.0871
-0.2505	1.512	-0.3155	1.39973	-0.1051	0.17061	-0.2466	10.7884
-0.2691	1.41026	-0.3248	1.62183	-0.1144	0.38181	-0.2559	10.8087
-0.278	1.29992	-0.3337	1.93093	-0.123	-0.45219	-0.2648	11.8007
-0.2863	1.30697	-0.3427	1.48262	-0.1316	-0.15706	-0.283	12.2119
-0.2956	1.58456	-0.3512	1.59871	-0.1409	0.1743	-0.2923	12.0318
-0.3046	1.60396	-0.3605	1.56022	-0.1502	0.29378	-0.3013	14.4725
-0.3138	1.79544	-0.3695	1.98529	-0.1592	0.75624	-0.3102	13.2325
-0.3231	1.9151	-0.3871	1.90785	-0.1678	0.69721	-0.3192	16.5059
-0.3324	1.03353	-0.3917	2.16697	-0.1768	0.57117	-0.3279	16.3629
-0.3404	1.59479	-0.4006	2.42677	-0.1951	0.97529	-0.3371	17.8857
-0.3496	1.74708	-0.4093	2.5142	-0.204	1.00262	-0.3464	17.0991
-0.3589	1.94435	-0.4185	2.5442	-0.2133	0.54628	-0.3557	21.3305
-0.3768	2.19631	-0.4278	2.97067	-0.2219	0.80634	-0.3647	20.1171
-0.3862	2.40566	-0.4371	2.67845	-0.231	1.44039	-0.3829	20.9907
-0.3947	2.80222	-0.45	2.77866	-0.2403	1.09713	-0.3921	24.8114
-0.4037	3.04821	-0.4638	3.22873	-0.2493	1.97652	-0.4008	25.4791
-0.4126	2.96263	-0.4731	3.19461	-0.2582	1.88868	-0.4097	23.8349
-0.4219	2.85811	-0.482	3.45214	-0.2765	1.53216	-0.4187	26.182
-0.4312	2.90824	-0.4907	3.67266	-0.2765	1.52521	-0.4279	24.6647
-0.4395	2.92368	-0.5	3.8544	-0.2941	2.7757	-0.4369	27.428
-0.4488	2.89369	-0.5086	3.41039	-0.3034	2.57435	-0.4462	28.45
-0.4671	3.38368	-0.5179	4.33957	-0.3127	2.71217	-0.4555	30.2629
-0.4761	3.06552	-0.5271	4.05581	-0.3216	3.12352	-0.4728	31.0488
-0.4854	3.59378	-0.5361	4.2776	-0.3302	3.50858	-0.4822	33.3785
-0.4937	3.58232	-0.5537	4.81904	-0.3392	2.88368	-0.4914	35.001
-0.5026	3.40586	-0.563	4.8235	-0.3482	3.0924	-0.5004	35.5478
-0.5119	3.54439	-0.5719	5.16814	-0.3575	3.3337	-0.5094	35.1859
-0.5212	3.68062	-0.5808	5.40586	-0.3668	3.65955	-0.5184	37.5932
-0.5305	3.8121	-0.5901	5.26733	-0.3847	3.98915	-0.5273	38.899
-0.5477	3.90227	-0.5991	5.29998	-0.3933	4.46468	-0.5362	39.1272
-0.5477	4.18151	-0.6077	5.38527	-0.4026	4.83179	-0.5544	39.6101
-0.566	4.29153	-0.6167	6.19578	-0.4119	5.15289	-0.5631	41.5445
-0.5752	4.38891	-0.626	5.73154	-0.4206	5.26055	-0.572	42.7097
-0.5842	4.61787	-0.6439	5.90905	-0.4299	5.68415	-0.5813	43.8394
-0.5928	4.69858	-0.6525	6.09303	-0.4388	6.00887	-0.5902	43.793
-0.6017	4.86848	-0.6618	6.33913	-0.4474	6.34479	-0.5992	45.6691
-0.611	5.07518	-0.6708	6.37073	-0.4564	5.82065	-0.6085	48.0696
-0.6203	5.10515	-0.68	6.67252	-0.4658	6.83405	-0.6174	49.4387
-0.6293	5.18251	-0.6894	7.30939	-0.484	7.32487	-0.6258	52.1659
-0.6469	5.59151	-0.698	6.80785	-0.4927	7.55241	-0.635	51.0539
-0.6562	5.66672	-0.7067	7.24167	-0.5017	7.39895	-0.6536	53.0034
-0.6648	5.73545	-0.7206	7.10147	-0.5109	8.12893	-0.6629	54.8776
-0.6741	5.92129	-0.7342	7.68878	-0.5199	8.50236	-0.6715	55.1241
-0.6834	6.12841	-0.7431	8.00692	-0.5292	8.30235	-0.6801	56.6653
-0.6917	5.85075	-0.7521	7.50563	-0.5385	8.9387	-0.6895	57.0572
-0.7007	6.19067	-0.7607	8.13409	-0.5472	8.87918	-0.6985	59.8437
-0.71	6.24879	-0.77	8.09274	-0.5561	9.25741	-0.7078	60.3896
-0.7193	6.74094	-0.7793	8.63411	-0.5698	9.24011	-0.7164	60.0802
-0.7332	7.35049	-0.7883	8.82177	-0.5744	9.76648	-0.725	63.4791
-0.7468	7.07748	-0.8015	8.74653	-0.5923	10.4898	-0.7436	64.2598
-0.7551	7.3108	-0.8151	8.87803	-0.6016	10.4028	-0.7525	65.5849
-0.7641	7.17766	-0.8241	9.16811	-0.6109	10.5381	-0.7615	67.0492
-0.7734	7.32595	-0.8331	9.2755	-0.6198	10.8003	-0.7705	67.1302
-0.7827	7.93407	-0.8423	9.51104	-0.6281	11.9522	-0.7794	68.9519
-0.8005	7.83038	-0.8513	9.93974	-0.6374	12.1966	-0.7884	70.1622
-0.8051	7.98258	-0.8596	9.84502	-0.6467	12.139	-0.7974	69.7433
-0.8138	8.17243	-0.8689	10.1634	-0.6557	12.4967	-0.8066	72.236
-0.823	8.22975	-0.8828	10.6647	-0.665	13.2256	-0.8159	72.4099
-0.8317	8.29707	-0.8874	10.2734	-0.6743	13.0266	-0.8245	74.6577
-0.8406	8.20157	-0.905	10.7345	-0.6924	13.3997	-0.8424	77.1405
-0.8496	8.45956	-0.914	10.8967	-0.697	13.8688	-0.8517	77.5798
-0.8589	8.55358	-0.923	10.873	-0.7106	14.4947	-0.8607	79.6095
-0.8682	8.50398	-0.9323	11.1305	-0.7189	13.9134	-0.87	80.7311
-0.8858	8.74608	-0.9416	11.5116	-0.7282	15.4011	-0.8789	80.923
-0.8947	8.85894	-0.9502	11.7043	-0.7375	15.5956	-0.8872	80.8012
-0.904	9.14828	-0.9592	11.8654	-0.7468	15.2159	-0.8965	82.7283
-0.913	9.20404	-0.9682	12.0847	-0.7561	15.4446	-0.9144	84.3928
-0.9223	9.54378	-0.9867	12.1196	-0.765	15.4738	-0.9191	85.6517
-0.9316	9.49631	-0.9953	12.6448	-0.774	16.2187	-0.9284	87.0564
-0.9406	9.77519	-1.0043	12.5503	-0.783	16.2864	-0.937	89.1288
-0.9488	10.0607	-1.0132	12.7365	-0.8009	16.5982	-0.9457	88.4003
-0.9581	10.2021	-1.0222	13.0074	-0.8098	17.3748	-0.955	89.8017
-0.9764	10.2107	-1.0312	12.9572	-0.8191	16.9776	-0.9643	89.9639
-0.9854	10.7045	-1.0451	13.7945	-0.8281	18.4326	-0.9732	91.536
-0.9947	10.619	-1.0584	13.5641	-0.8374	17.5357	-0.9822	92.7059
-1.003	10.7568	-1.0673	13.7308	-0.8467	19.2577	-1.0007	96.2872
-1.0122	10.9429	-1.0762	13.7338	-0.856	18.8013	-1.0097	96.1434
-1.0212	11.3758	-1.0852	13.9243	-0.8649	18.8729	-1.0187	96.9261
-1.0305	11.2523	-1.0945	14.3171	-0.8739	19.8072	-1.0273	97.7055
-1.0397	11.2955	-1.1035	14.234	-0.8832	20.0355	-1.0362	97.151
-1.057	11.509	-1.1117	14.7919	-0.8925	20.8813	-1.0455	98.1812
-1.057	11.7339	-1.1256	14.6967	-0.9018	21.1018	-1.0548	101.344
-1.0752	11.6429	-1.1396	15.1908	-0.9108	21.369	-1.0641	101.946
-1.0845	11.863	-1.1487	15.2724	-0.9292	21.5412	-1.0724	102.918
-1.0938	12.0169	-1.1573	15.7178	-0.9338	21.697	-1.0906	103.992
-1.1017	12.1938	-1.1662	15.5533	-0.9474	21.5764	-1.0999	104.812
-1.111	12.5686	-1.1755	15.7338	-0.9568	22.3632	-1.1085	107.257
-1.1203	12.7226	-1.1845	15.728	-0.9667	22.7186	-1.1178	108.024
-1.1296	12.8463	-1.1937	15.8311	-0.976	23.0428	-1.1267	106.543
-1.1385	13.0402	-1.2024	16.1476	-0.985	23.303	-1.1353	108.863
-1.1479	13.066	-1.2117	16.1552	-0.9942	23.1333	-1.1446	107.564
-1.1652	13.4134	-1.2203	16.5403	-1.0032	23.5427	-1.1537	108.048
-1.1744	13.5333	-1.2339	16.5116	-1.0125	24.4328	-1.1719	111.122
-1.1838	13.5201	-1.2475	16.9234	-1.0218	25.0203	-1.1809	112.898
-1.1927	13.9794	-1.2565	17.3574	-1.0311	24.7411	-1.1895	115.493
-1.201	13.5768	-1.2654	17.3061	-1.0443	25.2813	-1.1985	114.226
-1.2103	14.2801	-1.2743	17.3949	-1.0583	25.7889	-1.2078	115.54
-1.2195	14.1689	-1.2833	17.651	-1.0676	26.1028	-1.2171	116.181
-1.2286	14.299	-1.2926	17.9946	-1.0766	26.4586	-1.2264	116.841
-1.2375	14.7273	-1.3018	18.2576	-1.0858	26.5234	-1.235	118.079
-1.2468	14.9531	-1.3147	18.5833	-1.0948	26.6261	-1.2529	119.173
-1.264	14.9448	-1.3284	18.4569	-1.1041	26.4687	-1.2622	119.648
-1.2733	15.1379	-1.3377	18.4275	-1.1134	27.4217	-1.2711	120.864
-1.2826	15.5139	-1.3466	18.6215	-1.1224	27.9064	-1.2797	120.189
-1.2919	15.2705	-1.3553	18.7008	-1.1363	27.8063	-1.2886	122.645
-1.3008	15.5827	-1.3645	19.1847	-1.1499	28.0322	-1.2976	122.759
-1.3091	15.7492	-1.3732	19.2373	-1.159	28.4372	-1.3069	122.38
-1.3184	16.0474	-1.3919	19.8621	-1.1682	29.4049	-1.3158	123.158
-1.3276	16.3914	-1.3965	19.744	-1.1775	29.4374	-1.3337	126.324
-1.3366	16.3519	-1.4095	19.627	-1.1868	29.2971	-1.3337	128.315
-1.3542	16.5825	-1.4184	20.1705	-1.1954	29.6776	-1.3521	126.347
-1.3631	16.4264	-1.4277	20.1753	-1.2047	29.936	-1.3606	125.858
-1.3725	16.772	-1.4367	20.4411	-1.214	30.2336	-1.37	127.082
-1.3819	16.8356	-1.4456	20.7167	-1.2233	30.2798	-1.3793	128.273
-1.3911	16.7922	-1.4549	20.6041	-1.2327	31.7817	-1.388	131.354
-1.3998	17.0567	-1.4725	20.9486	-1.2416	31.3426	-1.3966	131.358
-1.4084	17.0268	-1.4818	20.8563	-1.2506	31.0194	-1.4059	131.176
-1.4177	17.1073	-1.4907	21.1497	-1.2691	31.8607	-1.4151	129.63
-1.4266	17.4764	-1.4996	21.1633	-1.2781	31.5316	-1.4331	130.599
-1.4356	17.5846	-1.5086	21.207	-1.2874	32.7689	-1.4417	131.772
-1.4538	17.9044	-1.5176	21.5866	-1.2967	31.9303	-1.451	132.535
-1.4624	17.7976	-1.5262	21.9327	-1.3057	32.3621	-1.4599	133.776
-1.4717	18.4138	-1.5355	21.9455	-1.3146	32.4112	-1.4692	133.352
-1.4807	18.3081	-1.5541	21.9091	-1.3239	33.056	-1.4785	133.6
-1.49	18.5638	-1.5581	22.1146	-1.3332	34.0502	-1.4868	135.743
-1.4989	18.7571	-1.5713	22.569	-1.3425	33.9711	-1.4957	137.466
-1.5082	18.5624	-1.5806	22.8091	-1.3518	33.4883	-1.505	133.796
-1.5175	18.9162	-1.5899	22.7291	-1.3604	34.5156	-1.5229	137.63
-1.5264	18.7997	-1.5989	22.498	-1.3698	34.8072	-1.5319	136.145
-1.5354	19.1798	-1.6076	23.0554	-1.3838	34.3191	-1.5409	140.141
-1.5533	19.296	-1.6168	23.2506	-1.3974	34.364	-1.5498	139.257
-1.5622	19.4957	-1.6255	24.0093	-1.4067	35.1468	-1.5591	137.582
-1.5712	19.6713	-1.6394	23.0956	-1.4157	35.5745	-1.5681	139.661
-1.5805	19.7993	-1.653	23.5983	-1.425	35.3245	-1.5774	141.647
-1.5898	19.8559	-1.6616	23.8758	-1.434	35.7238	-1.586	141.043
-1.5981	20.2611	-1.6706	24.4653	-1.4432	36.3055	-1.595	140.788
-1.6072	20.4643	-1.6799	24.3545	-1.4526	36.7829	-1.6039	139.112
-1.6164	20.3982	-1.6889	24.2692	-1.4619	36.0383	-1.6222	143.182
-1.6254	20.6519	-1.6978	24.2208	-1.4708	36.2472	-1.6315	141.679
-1.6393	20.8779	-1.7071	24.4635	-1.4798	37.21	-1.6405	144.496
-1.6439	20.8946	-1.7207	24.8957	-1.4937	37.6657	-1.6494	144.249
-1.6622	21.4465	-1.7336	25.3641	-1.5076	37.7005	-1.658	144.717
-1.6711	21.3988	-1.7429	25.5442	-1.5162	37.2425	-1.6673	144.533
-1.6798	21.4656	-1.7522	25.4188	-1.5255	37.7451	-1.6766	142.459
-1.689	21.7054	-1.7608	25.5824	-1.5348	38.55	-1.6856	146.02
-1.6977	21.7709	-1.7698	25.4796	-1.5441	37.7657	-1.6945	147.19
-1.707	22.0795	-1.7787	25.8508	-1.5531	38.2516	-1.7038	143.246
-1.7163	21.9647	-1.7876	25.9641	-1.5624	38.6754	-1.7132	145.742
-1.7255	22.351	-1.8016	25.5487	-1.5714	38.3648	-1.7303	145.097
-1.7428	22.2687	-1.8148	26.4486	-1.5806	39.6773	-1.7396	148.494
-1.7428	22.516	-1.8235	26.2689	-1.59	38.7409	-1.7489	145.58
-1.761	22.903	-1.8328	26.3744	-1.6083	39.1428	-1.7579	147.06
-1.7703	22.8457	-1.8422	26.3739	-1.6176	39.8059	-1.7672	147.739
-1.7796	22.688	-1.8511	26.8216	-1.6266	40.319	-1.7765	149.382
-1.7885	22.9276	-1.8604	27.0951	-1.6355	40.4343	-1.7848	148.682
-1.7968	23.1317	-1.8691	27.1559	-1.6448	40.6067	-1.7937	148.671
-1.8061	23.5433	-1.8777	26.9586	-1.6541	40.5043	-1.803	150.238
-1.8154	23.4239	-1.887	27.4366	-1.6635	41.0046	-1.8123	149.021
-1.8248	23.7453	-1.9053	27.6169	-1.6724	41.6891	-1.8302	149.889
-1.8334	23.7706	-1.9142	27.7979	-1.6814	41.2946	-1.8396	150.142
-1.8513	23.9691	-1.9232	28.0827	-1.6906	41.8895	-1.8488	152.218
-1.8603	23.9379	-1.9321	28.1173	-1.6999	41.9902	-1.8578	152.27
-1.8692	24.2166	-1.9411	27.9612	-1.7182	42.0088	-1.8668	152.063
-1.8785	24.5084	-1.95	28.1104	-1.7228	42.4903	-1.8754	153.991
-1.8878	24.9436	-1.9593	28.4789	-1.7364	41.3364	-1.8844	154.419
-1.8968	24.7319	-1.9682	28.9109	-1.7458	42.4683	-1.8937	155.375
-1.906	24.865	-1.9858	28.754	-1.7547	42.6157	-1.9029	153.089
-1.9144	24.7994	-1.9951	28.9702	-1.764	42.5521	-1.9119	154.68
-1.928	25.0551	-2.0044	28.7893	-1.7733	43.7596	-1.9295	155.28
-1.9326	24.8324	-2.0134	28.9487	-1.7826	43.3856	-1.9388	153.07
-1.9512	25.4659	-2.022	29.1726	-1.7912	44.2839	-1.9481	154.711
-1.9591	25.5117	-2.0309	29.7728	-1.8006	43.4665	-1.9567	153.888
-1.9684	25.5555	-2.0399	29.3819	-1.8098	43.3654	-1.966	153.723
-1.9776	25.6229	-2.0492	29.8294	-1.8191	43.8597	-1.9749	155.225
-1.9866	25.708	-2.0585	30.0078	-1.8328	44.2951	-1.9836	157.768
-1.9956	26.0676	-2.0718	29.6458	-1.8465	43.9584	-1.9925	155.501
-2.0049	26.5554	-2.0851	30.0074	-1.8557	44.2684	-2.0111	155.005
-2.0135	26.4777	-2.0944	30.0904	-1.8651	44.5351	-2.02	155.686
-2.0224	26.5684	-2.1033	29.9641	-1.874	44.9641	-2.029	159.389
-2.036	26.7052	-2.1123	30.6543	-1.8833	45.1862	-2.0376	156.154
-2.05	26.8859	-2.1213	30.3944	-1.8923	45.1542	-2.0465	157.337
-2.059	27.055	-2.1299	30.4391	-1.9016	45.4448	-2.0558	157.85
-2.0683	27.2614	-2.1392	30.7565	-1.9105	45.594	-2.0652	160.09
-2.0776	27.0686	-2.1481	31.0709	-1.9198	45.5563	-2.0745	157.848
-2.0856	27.5916	-2.1574	31.1434	-1.9291	45.6038	-2.0918	156.933
-2.0949	27.4784	-2.1754	31.326	-1.9474	46.403	-2.101	158.522
-2.1041	27.7728	-2.18	31.0688	-1.9563	46.1218	-2.11	160.925
-2.1134	27.7424	-2.1932	31.6107	-1.9656	47.6992	-2.119	158.884
-2.1307	27.975	-2.2022	31.3836	-1.9749	45.8032	-2.1283	162.192
-2.14	27.7065	-2.2115	31.6687	-1.9842	46.2594	-2.1372	161.306
-2.149	27.9115	-2.2204	31.809	-1.9932	46.5785	-2.1468	160.454
-2.1582	28.533	-2.2294	31.4811	-2.0022	46.2475	-2.1555	161.724
-2.1672	28.3262	-2.2381	32.3067	-2.0114	46.1686	-2.1648	164.121
-2.1765	28.7449	-2.2566	32.3845	-2.0207	46.0722	-2.1734	164.16
-2.1848	28.9572	-2.2612	32.0965	-2.0297	46.5575	-2.1823	164.064
-2.194	29.2251	-2.2742	32.4311	-2.039	47.1886	-2.2009	163.365
-2.203	29.1325	-2.2832	32.7095	-2.0573	47.828	-2.2092	164.919
-2.2213	29.59	-2.2921	32.7772	-2.0573	47.9422	-2.2181	164.046
-2.2305	29.4419	-2.3015	33.022	-2.0756	48.4332	-2.2274	165.602
-2.2398	29.6587	-2.3108	33.13	-2.0849	48.0046	-2.2367	163.072
-2.2478	29.3359	-2.3197	33.0785	-2.0942	47.4978	-2.2456	162.56
-2.257	29.6308	-2.3284	33.2353	-2.1035	48.5068	-2.2546	164.123
-2.2664	29.9083	-2.3419	33.1631	-2.1121	48.8799	-2.2636	164.234
-2.2756	29.8637	-2.3466	33.0173	-2.1214	47.8764	-2.2722	163.969
-2.2846	30.0846	-2.3646	33.3811	-2.1307	47.6689	-2.2815	165.338
-2.2932	29.9499	-2.3735	33.712	-2.14	47.8263	-2.2999	167.302
-2.3022	30.4925	-2.3822	34.0746	-2.149	48.1898	-2.3088	164.967
-2.3205	30.6855	-2.3914	33.4481	-2.1682	49.549	-2.3178	168.674
-2.3298	30.6516	-2.4004	33.9566	-2.1772	49.1997	-2.3271	165.501
-2.3388	30.8039	-2.4097	33.8817	-2.1864	49.0231	-2.3357	167.011
-2.3471	30.8299	-2.4189	33.6525	-2.1957	49.4889	-2.3446	166.912
-2.3563	30.6709	-2.4276	33.8006	-2.2047	49.7564	-2.3539	168.729
-2.3657	31.0189	-2.4455	34.3113	-2.214	49.7817	-2.3632	167.847
-2.3743	31.5435	-2.4501	34.0162	-2.2233	50.2361	-2.3718	167.823
-2.3836	31.4242	-2.4637	34.7181	-2.2323	50.0754	-2.3897	166.549
-2.3929	31.7204	-2.4723	34.5458	-2.2412	49.9722	-2.399	167.925
-2.4015	31.7825	-2.4816	34.9152	-2.2506	50.0503	-2.408	168.202
-2.4101	31.7326	-2.4902	34.8468	-2.2598	49.6463	-2.4169	169.165
-2.4287	31.527	-2.4995	34.9478	-2.2691	50.1977	-2.4259	167.196
-2.438	31.9041	-2.5088	35.3303	-2.2828	50.4127	-2.4345	169.027
-2.4469	31.9367	-2.5178	35.4799	-2.2964	51.2629	-2.4438	169.918
-2.4555	32.3401	-2.5265	35.4182	-2.3058	51.0947	-2.4531	171.171
-2.4645	32.4153	-2.5354	35.3749	-2.3151	50.664	-2.4621	168.915
-2.4734	32.3812	-2.5537	35.2903	-2.324	51.4777	-2.471	171.657
-2.4827	32.3351	-2.5626	35.4678	-2.333	51.3498	-2.4893	172.189
-2.492	32.5115	-2.572	35.9059	-2.3423	51.6194	-2.4976	172.149
-2.501	32.637	-2.5806	35.7758	-2.3516	51.8525	-2.5069	172.639
-2.5099	32.7013	-2.5895	36.1634	-2.3605	52.2488	-2.5161	172.139
-2.528	33.0481	-2.5989	36.0127	-2.3698	51.6899	-2.5255	171.426
-2.5369	32.8884	-2.6075	36.1887	-2.3791	51.3015	-2.5348	171.866
-2.5459	33.2212	-2.6167	36.1748	-2.3928	52.4616	-2.5437	171.844
-2.5552	33.6135	-2.6257	36.179	-2.4064	51.9715	-2.5527	172.497
-2.5644	33.5496	-2.6393	36.3773	-2.4156	51.7995	-2.562	174.562
-2.5737	33.5783	-2.6525	36.5939	-2.4249	52.4691	-2.5706	173.413
-2.5817	33.6705	-2.6618	36.5326	-2.4342	52.0727	-2.5885	174.956
-2.591	34.1641	-2.6708	36.6585	-2.4429	52.3968	-2.5979	173.416
-2.6092	34.1522	-2.6794	36.9639	-2.4522	53.2367	-2.6068	175.422
-2.6185	34.5439	-2.6884	37.2012	-2.4615	52.4527	-2.6161	172.887
-2.6278	34.5663	-2.6973	36.8804	-2.4708	52.7711	-2.6254	176.649
-2.6367	34.219	-2.7066	36.8886	-2.4797	52.5596	-2.6347	176.85
-2.645	34.4444	-2.7159	36.7557	-2.489	52.8674	-2.6433	173.353
-2.6543	34.3843	-2.7252	37.199	-2.5072	53.4092	-2.6525	174.902
-2.6636	34.4766	-2.7425	37.5395	-2.5072	52.2552	-2.6619	174.09
-2.6722	34.6864	-2.7518	37.4953	-2.5256	53.0165	-2.6705	176.857
-2.6815	35.304	-2.7612	37.3308	-2.5349	54.0155	-2.6884	177.492
-2.699	35.0913	-2.7698	37.5967	-2.5442	53.2952	-2.6977	176.978
-2.699	35.2962	-2.7787	37.7835	-2.5532	53.7432	-2.7066	177.985
-2.7173	35.5936	-2.7877	37.9538	-2.5622	53.5294	-2.7155	178.43
-2.7266	35.3771	-2.7967	38.0639	-2.5715	54.1672	-2.7242	179.233
-2.7356	35.485	-2.806	38.1248	-2.5808	54.3903	-2.7335	178.205
-2.7445	35.6372	-2.8242	38.3653	-2.5901	54.464	-2.7425	178.788
-2.7532	35.6061	-2.8328	38.3706	-2.599	55.4766	-2.7518	178.835
-2.7622	35.5079	-2.8418	38.5506	-2.608	54.4916	-2.7611	178.017
-2.7716	35.9042	-2.8508	38.5635	-2.6172	54.2185	-2.7694	179.378
-2.7808	36.0758	-2.8597	38.4903	-2.6359	55.1403	-2.7784	179.29
-2.798	36.1007	-2.869	39.0816	-2.6402	55.3805	-2.797	179.633
-2.8073	36.3646	-2.8779	39.2487	-2.6537	54.5101	-2.8056	180.253
-2.8166	36.498	-2.8868	38.7283	-2.663	54.5754	-2.8145	182.464
-2.8259	36.7265	-2.8954	39.1085	-2.6723	55.0357	-2.8235	181.952
-2.8349	36.9533	-2.9094	38.9409	-2.6813	54.7953	-2.8325	182.291
-2.8438	36.7323	-2.923	39.2962	-2.6906	55.1536	-2.8418	182.129
-2.8525	36.5922	-2.9317	39.2502	-2.6999	56.049	-2.8507	181.77
-2.8613	37.018	-2.9406	39.0275	-2.7088	56.1472	-2.86	182.332
-2.8706	37.3956	-2.9496	39.469	-2.7182	55.4311	-2.8686	183.873
-2.8888	37.2596	-2.9588	39.8056	-2.7318	55.9771	-2.8865	183.307
-2.8972	37.1612	-2.9681	39.7017	-2.7364	56.3146	-2.8865	183.457
-2.9064	37.1689	-2.9771	39.7971	-2.7551	55.2306	-2.9047	181.375
-2.9155	37.5692	-2.9905	39.8401	-2.7638	55.849	-2.9141	184.492
-2.9245	37.5725	-2.9948	40.2835	-2.7731	56.6333	-2.9227	185.403
-2.9337	37.7404	-3.013	40.4236	-2.7824	56.5164	-2.9313	183.782
-2.943	37.5113	-3.022	40.4939	-2.7917	56.4155	-2.9406	185.162
-2.9513	37.5684	-3.031	40.35	-2.8006	57.0469	-2.9499	184.357
-2.9695	37.7322	-3.0402	40.4511	-2.8099	56.1416	-2.9591	187.824
-2.9695	37.8381	-3.0488	40.3342	-2.8189	56.6526	-2.9678	186.925
-2.9882	38.3338	-3.0578	40.5691	-2.8282	57.1288	-2.9858	187.018
-2.9972	38.6743	-3.0671	40.8941	-2.8375	56.8054	-2.9948	186.796
-3.0055	38.1686	-3.0764	40.9205	-2.8464	57.2184	-3.0041	187.749
-3.0148	38.5708	-3.0937	40.751	-2.865	58.1096	-3.013	189.449
-3.0237	38.793	-3.1029	40.9173	-2.865	57.7471	-3.0217	184.839
-3.033	38.5245	-3.1118	40.9458	-2.8829	57.5795	-3.0306	187.871
-3.0423	38.9165	-3.1211	41.0366	-2.8922	57.9775	-3.0399	188.327
-3.0502	38.7645	-3.1304	41.0688	-2.9015	57.1273	-3.0492	189.472
-3.0595	39.2047	-3.1391	41.2611	-2.9108	57.426	-3.0578	189.608
-3.0781	39.0673	-3.1477	41.4857	-2.9198	57.1906	-3.076	189.956
-3.0868	39.3618	-3.157	41.5164	-2.9287	58.6633	-3.0847	191.262
-3.0961	39.2536	-3.1663	41.7022	-2.938	58.7753	-3.0936	189.578
-3.1046	39.1557	-3.1795	42.0714	-2.9473	58.1596	-3.1028	189.999
-3.1136	39.1279	-3.1932	41.5894	-2.9566	58.167	-3.1121	190.347
-3.1226	39.3199	-3.2018	41.3261	-2.9656	58.6932	-3.1211	190.734
-3.1318	39.0947	-3.2111	41.7993	-2.9796	59.5079	-3.1304	190.195
-3.1411	39.514	-3.2204	42.2124	-2.9839	58.6754	-3.1397	190.352
-3.1587	39.8597	-3.2294	41.9485	-3.0021	58.6038	-3.1487	191.12
-3.1587	39.7627	-3.238	42.0402	-3.0115	58.9015	-3.1573	191.597
-3.1767	40.165	-3.247	42.4646	-3.0208	59.837	-3.1755	191.303
-3.1859	40.442	-3.2606	43.0168	-3.0297	60.4118	-3.1755	190.004
-3.1953	40.5891	-3.2649	42.9748	-3.0387	59.9005	-3.1935	191.258
-3.2035	40.541	-3.2835	42.6398	-3.048	60.34	-3.2028	194.904
-3.2125	40.8377	-3.2924	42.6566	-3.0573	59.7108	-3.2118	193.231
-3.2219	41.1436	-3.3007	42.7429	-3.0666	59.7031	-3.2201	194.271
-3.2311	40.2657	-3.3101	42.5628	-3.0759	60.7716	-3.2294	197.063
-3.2404	40.5067	-3.3194	42.985	-3.0846	60.188	-3.2386	194.539
-3.2493	40.5725	-3.3283	42.6538	-3.0938	60.6736	-3.2479	196.291
-3.2669	41.2367	-3.3372	43.0047	-3.113	60.153	-3.2569	196.519
-3.2759	41.0841	-3.3459	43.1695	-3.1223	61.1727	-3.2662	195.526
-3.2852	41.3138	-3.3548	43.6431	-3.1313	61.1987	-3.2751	196.294
-3.2941	41.5797	-3.3734	43.359	-3.1406	60.9467	-3.2931	195.011
-3.3024	41.4107	-3.382	43.128	-3.1499	60.7197	-3.3023	195.067
-3.3117	41.3321	-3.3906	43.3805	-3.1588	60.2306	-3.311	198.791
-3.3211	41.2299	-3.3999	43.9041	-3.1682	61.2043	-3.32	196.757
-3.3299	41.5353	-3.4092	43.9866	-3.1771	61.0643	-3.3292	195.918
-3.339	42.0018	-3.4185	43.852	-3.1864	61.5313	-3.3385	199.772
-3.3482	42.117	-3.4274	43.7689	-3.1957	61.2165	-3.3471	199.812
-3.3659	41.7773	-3.4448	44.242	-3.2047	61.3315	-3.3564	198.717
-3.3748	41.8918	-3.4494	44.1838	-3.2137	62.7555	-3.3651	200.926
-3.3841	42.2565	-3.4584	44.3586	-3.2277	62.3103	-3.3833	201.182
-3.3933	42.6433	-3.4674	44.5808	-3.2417	61.9523	-3.3833	201.681
-3.4023	42.7832	-3.4767	44.6086	-3.2506	61.8799	-3.4015	200.665
-3.4106	42.3343	-3.486	44.314	-3.2596	62.2985	-3.4101	200.526
-3.4199	42.8614	-3.5036	44.8792	-3.2689	62.795	-3.4191	202.059
-3.4289	42.736	-3.5125	44.6905	-3.2781	62.2571	-3.4284	201.074
-3.4475	43.0454	-3.5218	44.4749	-3.2874	62.9683	-3.4377	202.796
-3.4568	43.1622	-3.5304	44.8277	-3.2964	63.218	-3.4467	204.243
-3.4648	42.9246	-3.5397	44.9775	-3.3057	62.8831	-3.4557	203.299
-3.4741	42.5478	-3.5487	45.4468	-3.3147	63.4534	-3.4647	205.294
-3.4834	42.5045	-3.5573	45.5411	-3.3239	63.2668	-3.4736	202.334
-3.4927	42.9096	-3.5662	45.4022	-3.3329	63.5593	-3.4915	204.265
-3.5013	42.9511	-3.5848	45.1936	-3.3422	63.0549	-3.5008	205.285
-3.5106	43.0605	-3.5937	45.3806	-3.3608	63.273	-3.5101	207.488
-3.5192	43.0504	-3.6027	45.6916	-3.3694	63.0977	-3.5187	209.416
-3.5291	43.3698	-3.6113	45.5145	-3.3787	63.5787	-3.5274	208.438
-3.5371	43.6849	-3.6203	45.5307	-3.388	63.4924	-3.5367	205.171
-3.5557	43.6575	-3.6296	46.0445	-3.3973	64.3855	-3.5456	204.527
-3.5646	43.9894	-3.6388	45.8072	-3.4065	64.6983	-3.5549	206.905
-3.5739	43.862	-3.6475	45.8855	-3.4156	64.1402	-3.5638	206.567
-3.5832	43.881	-3.6655	46.0343	-3.4245	64.6389	-3.5721	209.857
-3.5912	44.1307	-3.6748	46.4719	-3.4338	63.4786	-3.5907	208.982
-3.6005	43.751	-3.6838	46.9744	-3.4432	64.2653	-3.6	204.598
-3.6097	43.9557	-3.6931	46.2835	-3.4521	64.8166	-3.6086	208.904
-3.619	44.1841	-3.7017	46.599	-3.4614	64.4701	-3.6175	207.265
-3.6276	44.3409	-3.7104	46.874	-3.4707	65.8946	-3.6265	208.657
-3.637	44.4622	-3.7197	46.6412	-3.4886	65.0527	-3.6355	209.566
-3.6546	44.4302	-3.7289	46.8567	-3.4933	64.9818	-3.6447	211.22
-3.6639	44.4432	-3.7465	47.0704	-3.5072	65.7734	-3.6538	210.383
-3.6729	44.487	-3.7558	46.4441	-3.5165	65.4181	-3.6624	212.28
-3.6822	44.8276	-3.7648	47.0852	-3.5258	65.2496	-3.6807	211.765
-3.6911	44.8497	-3.7734	47.1442	-3.5344	65.6667	-3.6897	212.097
-3.7004	44.9956	-3.7827	46.806	-3.5438	65.6416	-3.699	212.469
-3.7091	44.8845	-3.7919	47.3281	-3.5531	66.0545	-3.708	216.465
-3.718	44.9564	-3.8009	47.5185	-3.5623	64.9218	-3.7169	215.146
-3.7362	45.0674	-3.8095	47.8031	-3.5713	66.367	-3.7255	213.141
-3.7408	45.3014	-3.8185	47.5996	-3.5849	66.7679	-3.7345	215.717
-3.7548	45.6891	-3.8324	47.7938	-3.5988	67.0613	-3.7438	216.865
-3.7631	45.5911	-3.846	47.7533	-3.6081	67.1895	-3.7531	217.506
-3.772	46.2212	-3.8546	47.523	-3.6171	66.2518	-3.7624	213.608
-3.7814	45.521	-3.8636	48.0215	-3.6264	65.7343	-3.771	214.075
-3.7903	45.6181	-3.8726	47.9782	-3.6354	66.7745	-3.7888	219.349
-3.7992	45.3235	-3.8819	48.0306	-3.6447	66.7933	-3.7978	217.883
-3.8085	45.4297	-3.8912	48.0237	-3.6537	67.7266	-3.8071	215.288
-3.8215	46.059	-3.8998	47.9123	-3.663	67.6556	-3.8157	215.635
-3.8261	46.1557	-3.9088	48.4267	-3.6723	67.7078	-3.8243	221.251
-3.8444	46.1978	-3.9178	48.8766	-3.6816	67.81	-3.8336	219.336
-3.8533	46.6966	-3.936	48.922	-3.6996	68.776	-3.8429	218.465
-3.8626	46.3738	-3.945	48.6073	-3.7095	67.896	-3.8519	219.152
-3.8712	46.588	-3.954	48.913	-3.7188	68.3683	-3.8698	221.132
-3.8799	46.7881	-3.9626	48.7551	-3.7281	67.5451	-3.8698	219.588
-3.8892	46.6787	-3.9719	48.9179	-3.7374	68.2185	-3.8878	223.542
-3.8985	46.9589	-3.9808	48.8858	-3.7464	69.2543	-3.8967	222.036
-3.9078	47.1165	-3.9901	48.9186	-3.7553	69.6043	-3.9061	223.269
-3.9158	46.977	-3.9991	49.5646	-3.7646	68.9652	-3.9154	223.821
-3.9297	47.0204	-4.017	48.8356	-3.774	69.2786	-3.924	225.319
-3.9433	46.7588	-4.0256	49.5057	-3.7829	69.4135	-3.9326	223.26
-3.9526	47.0201	-4.0349	50.1735	-3.7921	69.6195	-3.9419	224.114
-3.9619	47.3556	-4.0442	49.6348	-3.8014	69.7366	-3.9508	225.665
-3.9699	47.1413	-4.0531	49.8666	-3.8104	70.0867	-3.9601	223.455
-3.9792	46.9634	-4.0614	50.1496	-3.8287	70.3357	-3.9774	226.108
-3.9885	47.7286	-4.0753	49.5605	-3.8379	69.7549	-3.9867	224.76
-3.9978	47.9953	-4.0889	50.0544	-3.8472	70.4301	-3.996	227.223
-4.0067	47.5208	-4.0982	50.3008	-3.8565	70.5778	-4.0053	227.843
-4.0156	47.6366	-4.1069	50.3587	-3.8652	70.048	-4.0146	228.506
-4.0242	47.9368	-4.1155	49.9999	-3.8745	69.7918	-4.0232	230.424
-4.0378	48.0642	-4.1248	50.5798	-3.8838	70.725	-4.0321	229.629
-4.0515	48.316	-4.1342	50.499	-3.8931	71.4997	-4.041	231.254
-4.0607	47.912	-4.1435	50.4736	-3.9021	71.4302	-4.0504	230.364
-4.069	47.783	-4.1518	50.5952	-3.9204	71.7601	-4.059	228.209
-4.0783	48.0002	-4.1611	51.0879	-3.9297	72.0388	-4.0683	232.582
-4.0873	48.1647	-4.179	51.0416	-3.9387	72.4064	-4.0776	231.465
-4.0966	48.4775	-4.188	50.5275	-3.9479	71.7779	-4.0958	230.867
-4.1056	48.6872	-4.1972	50.5306	-3.9573	71.773	-4.1048	230.974
-4.1189	48.5987	-4.2062	50.9144	-3.9666	71.4373	-4.1131	235.037
-4.1232	48.6129	-4.2148	50.8722	-3.9755	72.2394	-4.1224	230.982
-4.1415	48.6385	-4.2241	50.5791	-3.9845	72.159	-4.1317	235.209
-4.1507	49.1551	-4.2331	50.9091	-3.9938	71.7712	-4.141	236.453
-4.1601	48.9718	-4.242	50.5949	-4.0031	72.6493	-4.1497	240.44
-4.1683	48.9446	-4.2513	51.0196	-4.0124	73.3722	-4.1589	236.716
-4.1773	48.938	-4.2645	51.5819	-4.0213	73.4231	-4.1679	237.45
-4.1866	49.227	-4.2778	51.3851	-4.0302	73.2306	-4.1775	235.542
-4.1955	49.356	-4.2871	51.7033	-4.0489	73.3791	-4.1954	236.765
-4.2048	49.3768	-4.2964	51.1327	-4.0535	72.9572	-4.2044	239.615
-4.2221	49.3121	-4.3047	51.5999	-4.0671	71.959	-4.213	237.817
-4.2267	49.5849	-4.314	51.95	-4.0764	73.2172	-4.2224	240.277
-4.2407	49.4594	-4.323	52.3986	-4.0853	74.5061	-4.2317	243.04
-4.2496	49.6751	-4.3319	52.4232	-4.0947	73.7034	-4.2406	239.51
-4.2586	49.5727	-4.3412	52.5292	-4.1036	73.7802	-4.2495	240.726
-4.2679	49.1938	-4.3505	52.7931	-4.113	74.609	-4.2585	242.784
-4.2765	49.3715	-4.3679	52.4169	-4.1223	73.9156	-4.2674	241.266
-4.2855	49.5369	-4.3771	52.7326	-4.1312	74.1752	-4.2764	241.126
-4.2944	49.9688	-4.3864	52.9901	-4.1403	74.7859	-4.2853	244.62
-4.3037	50.6917	-4.3954	52.7054	-4.1496	74.074	-4.3039	245.598
-4.3223	50.2911	-4.4043	53.0237	-4.1682	74.727	-4.3132	243.558
-4.3312	50.1556	-4.4133	52.991	-4.1682	75.1928	-4.3221	248.153
-4.3402	50.3402	-4.4223	52.8013	-4.1861	74.7372	-4.3311	246.172
-4.3488	50.4569	-4.4312	53.3019	-4.1954	75.24	-4.3401	246.95
-4.3578	50.6557	-4.4402	53.2466	-4.2047	75.3568	-4.3487	248.318
-4.3672	50.3367	-4.4495	53.7268	-4.214	75.5426	-4.358	248.961
-4.3765	50.1918	-4.4584	53.553	-4.2229	75.4813	-4.3674	247.231
-4.3854	50.3608	-4.476	53.8337	-4.2323	76.8264	-4.3853	248.669
-4.3943	50.2543	-4.4853	53.2823	-4.2412	76.7849	-4.3942	249.37
-4.4082	50.7931	-4.4943	53.4885	-4.2505	76.8525	-4.4032	250.717
-4.4209	50.9625	-4.5035	54.186	-4.2595	76.2301	-4.4118	251.913
-4.4302	50.9707	-4.5122	53.6338	-4.278	76.8823	-4.4211	252.856
-4.4395	50.8873	-4.5208	53.7174	-4.2873	76.6526	-4.4304	252.275
-4.4488	50.8429	-4.5347	54.456	-4.2963	77.7098	-4.4397	255.416
-4.4577	51.3186	-4.5394	54.2611	-4.3052	77.4508	-4.4484	254.917
-4.4671	51.2055	-4.5577	53.7951	-4.3145	77.3182	-4.4576	256.012
-4.476	51.3077	-4.5663	54.1865	-4.3238	77.8912	-4.4663	255.545
-4.4852	51.3751	-4.5753	54.5234	-4.3331	78.1541	-4.4845	256.464
-4.4935	51.9513	-4.5842	55.0984	-4.3421	77.1958	-4.4937	256.704
-4.5118	51.5992	-4.5936	54.7041	-4.3511	78.0896	-4.502	258.474
-4.5208	51.64	-4.6025	55.1898	-4.3604	78.3684	-4.511	257.319
-4.5301	51.8115	-4.6115	54.8125	-4.3697	78.7403	-4.5203	258.71
-4.5393	52.3021	-4.6204	55.3234	-4.3887	79.2322	-4.5296	259.816
-4.5473	51.9597	-4.6384	54.7658	-4.398	79.4836	-4.5382	257.612
-4.5566	52.2622	-4.643	54.8329	-4.4073	79.052	-4.5475	259.244
-4.5659	52.2265	-4.6566	55.1454	-4.4162	78.3626	-4.5565	262.004
-4.5752	52.2055	-4.6656	55.2265	-4.4255	79.7392	-4.5651	261.405
-4.5841	52.208	-4.6742	55.5667	-4.4345	79.4106	-4.5744	260.692
-4.5935	52.5053	-4.6832	55.6493	-4.4438	80.4284	-4.5927	261.301
-4.6107	52.2919	-4.6925	55.612	-4.4531	79.9664	-4.6017	261.386
-4.62	52.643	-4.7018	55.7385	-4.4624	80.4192	-4.6107	264.342
-4.6293	52.4479	-4.7107	56.128	-4.471	81.314	-4.6199	266.807
-4.6383	52.7226	-4.724	55.9635	-4.4802	81.3117	-4.6283	263.984
-4.6476	52.5972	-4.7372	56.1223	-4.4989	81.2545	-4.6375	264.351
-4.6559	52.771	-4.7465	56.1954	-4.4989	80.181	-4.6468	269.236
-4.6652	52.7933	-4.7558	56.5514	-4.5171	81.7904	-4.6561	267.068
-4.6745	52.9628	-4.7644	56.3342	-4.5261	81.3735	-4.674	267.545
-4.6831	52.7758	-4.7734	56.0873	-4.5354	81.7529	-4.6833	269.319
-4.7017	52.958	-4.7824	56.0585	-4.5447	81.885	-4.6923	265.997
-4.7099	52.7684	-4.7917	56.3319	-4.5547	82.0202	-4.7009	267.19
-4.7189	52.8522	-4.8006	56.56	-4.5636	81.8253	-4.7098	270.15
-4.7282	53.3078	-4.8096	56.9485	-4.573	81.7076	-4.7192	270.289
-4.7375	53.4689	-4.8273	57.0975	-4.5822	82.4828	-4.7284	273.927
-4.7465	53.2102	-4.8319	56.9763	-4.5913	82.2278	-4.7374	274.239
-4.7548	53.6156	-4.8455	57.1813	-4.6002	82.4806	-4.7467	272.95
-4.764	53.7941	-4.8548	57.1152	-4.6095	83.275	-4.7553	271.561
-4.7823	53.5926	-4.8638	57.1777	-4.6188	83.2927	-4.7732	274.603
-4.7823	53.226	-4.8727	57.5348	-4.6281	83.6224	-4.7825	274.881
-4.8009	53.7892	-4.8817	57.7434	-4.6461	82.9856	-4.7918	277.523
-4.8088	54.0964	-4.8903	57.4369	-4.6553	83.2486	-4.8004	276.158
-4.8182	53.5868	-4.8996	57.8136	-4.6646	84.8363	-4.8097	277.939
-4.8275	54.0473	-4.9132	57.7915	-4.6739	84.7901	-4.819	278.827
-4.8364	54.1506	-4.9262	57.486	-4.6829	84.8279	-4.8284	280.006
-4.8454	54.3923	-4.9354	57.8268	-4.6922	84.9367	-4.837	277.938
-4.8544	54.1663	-4.9447	58.4232	-4.7012	85.0089	-4.8456	279.799
-4.863	54.6623	-4.9537	58.0905	-4.7104	84.7043	-4.8549	281.844
-4.8816	54.3747	-4.963	58.2617	-4.7194	84.9281	-4.8732	281.462
-4.8906	54.7233	-4.9716	58.5505	-4.7287	85.4692	-4.8824	283.087
-4.8995	54.8176	-4.9802	58.4534	-4.738	85.5746	-4.8907	280.488
-4.9082	54.6558	-4.9895	58.8612	-4.7563	85.2882	-4.8997	284.836
-4.9174	54.6862	-4.9988	58.6401	-4.7606	85.601	-4.909	282.962
-4.9261	54.7758	-5.0081	58.4196	-4.7745	86.8738	-4.9183	285.036
-4.9353	54.6595	-5.0211	59.5177	-4.7838	86.926	-4.9269	286.569
-4.9446	55.2561	-5.0347	58.5898	-4.7938	87.2273	-4.9362	285.935
-4.9539	55.2797	-5.0436	59.549	-4.8031	86.2973	-4.9451	290.088
-4.9668	55.339	-5.0527	59.2876	-4.812	86.0369	-4.9627	290.756
-4.9805	55.341	-5.062	59.2083	-4.821	86.4891	-4.9627	288.706
-4.9894	55.3504	-5.0709	59.3355	-4.8304	87.7332	-4.9813	291.701
-4.9987	55.1121	-5.0796	60.0163	-4.8397	88.2531	-4.9902	292.828
-5.008	54.9013	-5.0978	60.0062	-4.8486	88.0204	-4.9992	293.064
-5.0166	55.1173	-5.1067	60.0898	-4.8579	87.5724	-5.0078	292.071
-5.0252	54.9865	-5.116	60.028	-4.8672	87.9991	-5.0172	294.88
-5.0345	55.1614	-5.125	60.2188	-4.8855	88.7157	-5.0261	294.429
-5.0438	55.3469	-5.1333	60.5855	-4.8944	88.9154	-5.0354	294.713
-5.0525	55.534	-5.1426	60.5737	-4.9037	88.757	-5.0447	294.673
-5.0704	55.9417	-5.1519	60.8001	-4.913	89.1084	-5.0531	293.417
-5.0797	56.0176	-5.1612	60.5034	-4.922	88.7655	-5.0713	297.711
-5.0883	56.1754	-5.1787	60.9336	-4.931	90.2127	-5.0806	300.714
-5.0976	56.1601	-5.1877	61.4054	-4.9402	89.0925	-5.0896	298.745
-5.107	56.322	-5.1967	61.1534	-4.9495	89.3591	-5.0982	298.882
-5.1162	56.1568	-5.206	61.2978	-4.9588	90.2852	-5.1072	299.799
-5.1245	56.2331	-5.2152	61.6399	-4.9688	89.193	-5.1161	300.347
-5.1335	56.276	-5.2239	61.6601	-4.9781	90.0764	-5.1254	303.205
-5.1428	56.9201	-5.2325	61.8336	-4.996	90.949	-5.1344	303.773
-5.1517	57.1909	-5.2418	61.6439	-5.0053	90.7729	-5.1437	302.192
-5.1703	56.9715	-5.2511	61.7507	-5.0146	90.2256	-5.1523	302.119
-5.1792	57.1302	-5.2644	62.0346	-5.0236	90.8718	-5.1702	303.259
-5.1882	56.7808	-5.278	62.2182	-5.0329	90.8385	-5.1791	306.837
-5.1968	57.2311	-5.2867	62.5569	-5.0422	90.4286	-5.1884	307.823
-5.2061	57.1565	-5.2957	62.4387	-5.0512	91.3585	-5.1977	306.189
-5.2151	57.0748	-5.3049	62.0176	-5.0602	92.239	-5.2064	309.186
-5.224	56.9414	-5.3143	62.1637	-5.0695	92.1495	-5.2149	309.083
-5.2333	57.1735	-5.3229	62.2856	-5.0788	91.8888	-5.2243	305.981
-5.2426	57.089	-5.3319	62.8089	-5.0881	92.2629	-5.2335	311.122
-5.2599	57.1952	-5.3408	63.0501	-5.0974	93.5866	-5.2425	311.311
-5.2692	57.6023	-5.3498	62.9775	-5.1107	92.6613	-5.2601	314.964
-5.2782	57.4527	-5.3684	63.2292	-5.1246	92.6805	-5.2601	313.061
-5.2875	58.0305	-5.3723	63.5368	-5.1339	92.9932	-5.2784	314.607
-5.2968	57.6941	-5.3856	64.0648	-5.1428	94.3909	-5.2877	314.117
-5.3061	57.5547	-5.3949	63.6047	-5.1518	94.1498	-5.297	316.344
-5.3148	57.8713	-5.4041	63.9763	-5.1611	95.6485	-5.3053	316.978
-5.324	58.298	-5.4131	63.9836	-5.1704	94.4843	-5.3143	315.699
-5.3333	57.9555	-5.4217	64.3845	-5.1793	94.7445	-5.3236	316.321
-5.3416	58.1622	-5.431	64.2332	-5.1886	94.9365	-5.3325	318.579
-5.3599	58.7453	-5.4396	63.9433	-5.1979	95.2123	-5.3414	320.55
-5.3691	58.5928	-5.4489	64.6342	-5.2069	95.1773	-5.3504	322.825
-5.3781	58.3804	-5.4582	64.756	-5.2162	96.1645	-5.3683	322.112
-5.3874	58.3479	-5.4759	64.9235	-5.2255	96.1624	-5.3773	324.046
-5.3957	58.3863	-5.4848	65.1153	-5.2398	96.379	-5.3866	322.544
-5.4046	59.013	-5.4941	64.5247	-5.2444	96.7585	-5.3958	323.014
-5.4139	59.0186	-5.5027	64.4838	-5.263	97.5014	-5.4044	323.646
-5.4232	59.0642	-5.5121	65.5635	-5.272	97.8655	-5.4131	326.89
-5.4325	59.0454	-5.5214	65.3441	-5.281	96.9548	-5.4223	325.273
-5.4411	59.1573	-5.5304	65.2006	-5.2903	97.1459	-5.4313	326.23
-5.459	59.039	-5.539	65.0685	-5.2996	96.3998	-5.4406	325.827
-5.468	58.773	-5.548	65.2091	-5.3086	97.7818	-5.4499	327.436
-5.477	58.9575	-5.5662	65.7903	-5.3179	97.8043	-5.4675	330.63
-5.4863	59.3232	-5.5751	66.1253	-5.3268	99.3758	-5.4719	329.096
-5.4956	59.7273	-5.5841	66.0294	-5.3361	98.7991	-5.4858	330.035
-5.5039	58.9605	-5.5927	66.034	-5.3454	99.2742	-5.4948	329.026
-5.5132	59.2844	-5.6021	65.9869	-5.3544	98.5231	-5.5037	330.674
-5.5222	59.7138	-5.6113	66.6326	-5.373	99.1737	-5.5131	332.932
-5.5312	60.5127	-5.6206	66.6819	-5.3829	98.5122	-5.5224	333.758
-5.5498	60.3132	-5.6289	66.0333	-5.3923	98.7789	-5.5313	333.725
-5.5577	60.5165	-5.6379	66.3606	-5.4008	100.398	-5.5403	337.656
-5.567	59.9136	-5.6472	66.7682	-5.4101	100.249	-5.5489	334.431
-5.5763	60.4098	-5.6654	67.7363	-5.4194	100.317	-5.5579	336.535
-5.5856	60.146	-5.6744	67.5766	-5.4288	101.385	-5.5764	337.661
-5.5949	60.4888	-5.6833	67.173	-5.4377	99.6754	-5.5858	337.462
-5.6029	60.434	-5.692	67.8845	-5.447	100.402	-5.5947	335.859
-5.6121	60.9646	-5.7013	67.6989	-5.4559	101.691	-5.6034	338.365
-5.6304	60.3722	-5.7102	67.2426	-5.4653	102.223	-5.6123	341.052
-5.6304	60.8614	-5.7192	67.5285	-5.4746	102.474	-5.6212	341.605
-5.6486	60.831	-5.7285	67.6689	-5.4836	102.199	-5.6305	345.213
-5.6569	61.3284	-5.7375	67.7034	-5.5021	103.421	-5.6395	344.85
-5.6662	61.6407	-5.7504	68.1543	-5.5021	102.71	-5.6487	342.735
-5.6755	61.5582	-5.7644	68.1254	-5.5201	101.533	-5.6577	345.516
-5.6844	61.3162	-5.7737	68.1046	-5.5294	104.264	-5.6763	342.637
-5.6934	61.4161	-5.7823	68.7716	-5.5388	103.831	-5.6763	344.62
-5.7024	61.5964	-5.791	68.4172	-5.548	104.693	-5.6935	347.902
-5.7113	61.8256	-5.8002	68.7391	-5.5567	104.25	-5.7028	347.821
-5.7293	61.4395	-5.8092	69.182	-5.566	103.361	-5.7121	344.022
-5.7386	61.1418	-5.8185	68.6384	-5.5753	104.762	-5.7211	347.759
-5.7479	61.0849	-5.8318	69.145	-5.5846	104.14	-5.7301	345.219
-5.7562	61.3199	-5.8451	69.2618	-5.5939	104.615	-5.7391	345.771
-5.7652	61.244	-5.8543	69.3763	-5.6118	104.802	-5.7477	351.023
-5.7745	61.6603	-5.8636	69.8721	-5.6118	105.732	-5.757	353.531
-5.7834	62.0843	-5.8726	69.945	-5.6303	105.109	-5.7659	352.024
-5.7928	62.6256	-5.8812	70.0254	-5.6396	106.536	-5.7845	357.695
-5.802	62.5483	-5.8905	69.7558	-5.6493	106.055	-5.7932	352.42
-5.8113	62.6144	-5.8991	69.9702	-5.6586	106.218	-5.8018	357.53
-5.8193	62.4922	-5.9084	70.2544	-5.6679	107.419	-5.8111	352.949
-5.8379	62.4536	-5.9174	69.9551	-5.6772	106.94	-5.82	359.293
-5.8468	61.9985	-5.9353	70.5686	-5.6861	107.356	-5.8294	360.29
-5.8557	62.2293	-5.94	70.4936	-5.6951	107.705	-5.8386	358.734
-5.8647	62.6943	-5.9532	70.3147	-5.7044	106.931	-5.8473	358.709
-5.8734	62.6632	-5.9622	70.5444	-5.7137	107.983	-5.8559	361.258
-5.8827	62.6318	-5.9716	70.4806	-5.723	108.287	-5.8651	360.157
-5.8915	62.8509	-5.9809	71.257	-5.741	108.49	-5.8834	362.287
-5.9009	62.6903	-5.9899	70.6779	-5.7503	109.637	-5.8927	362.781
-5.9098	63.1308	-5.9982	71.7416	-5.7596	107.678	-5.9013	364.474
-5.9191	63.4306	-6.0074	70.6236	-5.7686	107.602	-5.9099	366.896
-5.9364	63.2368	-6.0213	71.3994	-5.7779	109.465	-5.9192	366.613
-5.9457	63.3668	-6.0257	71.4737	-5.7868	109.179	-5.9286	369.375
-5.955	63.5159	-6.0436	70.7634	-5.7961	109.226	-5.9375	368.137
-5.9643	63.4186	-6.0522	71.428	-5.8054	109.856	-5.9461	368.345
-5.9733	63.8522	-6.0616	71.8585	-5.8144	111.399	-5.9551	368.575
-5.9823	63.6079	-6.0709	71.6661	-5.8237	110.52	-5.9644	371.323
-5.9909	63.3823	-6.0801	72.3531	-5.833	111.489	-5.9731	373.08
-5.9999	64.0922	-6.0884	72.5195	-5.8523	110.488	-5.9917	370.472
-6.0184	64.3362	-6.0973	72.4347	-5.8608	110.964	-6.0003	366.134
-6.0274	64.2739	-6.1066	72.0942	-5.8702	110.95	-6.0089	373.395
-6.0364	64.1144	-6.1246	72.6473	-5.8794	111.842	-6.0183	379.058
-6.0456	64.3199	-6.1339	72.987	-5.8887	112.586	-6.0275	380.675
-6.0549	64.2277	-6.1428	73.0453	-5.8977	111.743	-6.0365	378.182
-6.0629	64.6823	-6.1515	73.4731	-5.9067	112.601	-6.0457	377.781
-6.0729	65.028	-6.1604	73.2984	-5.916	112.794	-6.0547	376.141
-6.0815	64.5793	-6.1697	73.1251	-5.9253	112.973	-6.063	375.524
-6.0908	64.7101	-6.183	73.729	-5.9346	113.607	-6.0815	379.796
-6.0997	64.2932	-6.1876	73.657	-5.9436	113.51	-6.0908	380.723
-6.109	65.3046	-6.2053	73.4057	-5.9618	113.345	-6.0991	379.219
-6.1273	65.1051	-6.2146	73.5443	-5.9712	113.787	-6.1081	383.585
-6.1356	64.9986	-6.2239	73.6469	-5.9802	113.882	-6.1174	380.998
-6.1448	65.2361	-6.2332	74.1889	-5.9894	113.369	-6.1267	382.069
-6.1538	65.462	-6.2415	74.2117	-5.9987	114.799	-6.1357	384.632
-6.1628	65.6309	-6.2505	73.8927	-6.0081	114.844	-6.1446	384.768
-6.1721	65.1304	-6.2597	74.1881	-6.0167	115.532	-6.1536	388.654
-6.1814	65.2787	-6.2687	74.4903	-6.026	113.504	-6.1622	390.026
-6.1907	65.3615	-6.278	75.0486	-6.0353	115.065	-6.1804	390.782
-6.208	65.3873	-6.2913	74.7024	-6.0446	115.79	-6.1897	391.531
-6.208	65.5002	-6.3046	75.319	-6.0536	115.324	-6.1984	388.039
-6.2266	65.4281	-6.3138	75.1724	-6.0718	116.084	-6.2074	389.08
-6.2355	65.6543	-6.3231	75.1018	-6.0817	115.216	-6.2164	388.92
-6.2445	65.8494	-6.3318	75.6839	-6.091	115.662	-6.2253	392.324
-6.2531	65.6185	-6.3407	74.9786	-6.1003	116.313	-6.2346	388.307
-6.2621	66.2372	-6.3497	75.6964	-6.1093	116.568	-6.2439	392.117
-6.2714	66.0104	-6.3586	75.7968	-6.1186	116.373	-6.2525	395.278
-6.2803	66.2008	-6.3676	76.0307	-6.1279	117.283	-6.2704	395.826
-6.2896	66.9224	-6.3769	76.4366	-6.1369	118.146	-6.2704	397.389
-6.3079	67.0283	-6.3948	76.8269	-6.1458	118.799	-6.2887	398.47
-6.3079	66.957	-6.4035	76.5772	-6.1551	119.622	-6.298	400.743
-6.3264	66.4207	-6.4128	76.8018	-6.1644	118.361	-6.3066	403.28
-6.3344	66.9938	-6.4217	76.819	-6.1737	119.295	-6.3152	400.223
-6.3437	67.2873	-6.4311	77.3703	-6.1827	119.318	-6.3245	396.72
-6.353	67.0005	-6.4401	77.2413	-6.201	119.321	-6.3337	402.707
-6.3619	66.8058	-6.449	77.4509	-6.2103	118.289	-6.3431	403.967
-6.3709	66.7188	-6.4577	77.1359	-6.2196	120.081	-6.3513	409.657
-6.3795	66.7067	-6.4763	77.6577	-6.2286	120.088	-6.3696	403.889
-6.3885	66.9067	-6.4852	78.0152	-6.2379	121.1	-6.3786	405.901
-6.4071	67.9155	-6.4938	78.2919	-6.2468	120.705	-6.3876	405.837
-6.4161	67.8748	-6.5028	77.5949	-6.2568	119.966	-6.3968	406.253
-6.4251	67.9859	-6.5118	77.9256	-6.2661	120.217	-6.4061	407.58
-6.4337	67.861	-6.5211	78.0404	-6.2751	120.944	-6.4148	408.663
-6.443	67.9701	-6.5304	78.7068	-6.2843	121.826	-6.4244	412.302
-6.4517	67.9757	-6.5393	78.4179	-6.2936	122.187	-6.4334	410.176
-6.4609	68.1288	-6.5569	78.9155	-6.3029	121.828	-6.4427	412.16
-6.4702	68.1493	-6.5662	78.7915	-6.3115	123.201	-6.4514	413.414
-6.4796	67.7364	-6.5748	79.1769	-6.3301	122.858	-6.4696	414.344
-6.4885	68.1175	-6.5841	79.4122	-6.3394	122.535	-6.4786	419.135
-6.4968	68.6235	-6.593	79.552	-6.3487	122.703	-6.4875	419.107
-6.5151	69.1478	-6.6016	79.2033	-6.3577	123.565	-6.4968	417.712
-6.5243	69.3733	-6.6107	80.7456	-6.3667	124.208	-6.5061	420.773
-6.5336	69.0409	-6.6199	80.0215	-6.3759	124.731	-6.5154	423.015
-6.5422	69.7725	-6.6292	79.6709	-6.3852	124.222	-6.5243	421.306
-6.5508	69.7883	-6.6425	80.1293	-6.3942	125.104	-6.533	423.721
-6.5601	69.6382	-6.6558	80.6206	-6.4035	124.325	-6.5419	420.954
-6.5694	69.1639	-6.6648	80.7327	-6.4128	125.123	-6.5509	420.409
-6.5781	69.5333	-6.6741	80.856	-6.4218	125.573	-6.5602	425.55
-6.5874	69.9364	-6.6834	80.7495	-6.4308	125.627	-6.5784	427.32
-6.5967	69.9534	-6.6921	80.0557	-6.4401	125.054	-6.587	431.599
-6.6149	69.7853	-6.701	81.2088	-6.4587	125.362	-6.596	427.264
-6.6242	69.8747	-6.71	80.8544	-6.468	126.025	-6.6049	431.073
-6.6325	70.4148	-6.7193	81.3351	-6.4767	126.611	-6.6139	428.695
-6.6415	70.497	-6.7282	81.1972	-6.4859	127.827	-6.6232	429.78
-6.6508	71.3495	-6.7461	81.5825	-6.4959	127.421	-6.6325	430.977
-6.6601	71.3315	-6.7548	82.2035	-6.5052	127.661	-6.6412	430.919
-6.6691	71.112	-6.7641	81.7097	-6.5145	128.8	-6.6497	434.068
-6.6781	71.2608	-6.7733	81.6924	-6.5235	128.766	-6.6591	435.492
-6.6867	70.9656	-6.7823	82.0421	-6.5328	128.386	-6.6774	433.854
-6.7046	70.4494	-6.7912	82.6151	-6.5417	128.81	-6.6867	434.39
-6.7046	69.8403	-6.8048	82.5951	-6.551	129.941	-6.6957	441.012
-6.7232	70.5814	-6.8092	82.5989	-6.56	130.125	-6.7049	441.117
-6.7325	71.176	-6.8271	82.57	-6.5693	129.382	-6.7139	439.626
-6.7415	71.2353	-6.8364	83.2302	-6.5879	129.262	-6.7228	438.51
-6.7507	71.2009	-6.8454	83.5189	-6.5925	129.192	-6.7322	439.218
-6.7597	71.7899	-6.8543	83.6273	-6.6058	130.532	-6.7404	445.856
-6.768	72.137	-6.863	83.731	-6.6151	132.15	-6.7497	446.221
-6.7773	72.3475	-6.8722	84.2174	-6.6244	130.936	-6.759	443.825
-6.7866	71.9514	-6.8812	83.6442	-6.6337	130.308	-6.7769	445.986
-6.7955	71.4253	-6.8906	83.9588	-6.6427	131.771	-6.7855	445.803
-6.8045	71.457	-6.8992	84.1772	-6.6516	132.151	-6.7948	448.006
-6.8138	71.7568	-6.9171	84.3585	-6.661	131.88	-6.8041	450.949
-6.8314	71.9676	-6.9265	84.8163	-6.6709	131.721	-6.8131	454.255
-6.8403	72.524	-6.9357	84.7621	-6.6803	133.804	-6.8224	450.861
-6.8496	72.5361	-6.9447	85.0101	-6.6892	133.555	-6.831	451.348
-6.8589	72.9691	-6.9533	85.2751	-6.7032	133.612	-6.8397	450.065
-6.8679	73.1346	-6.9623	85.0417	-6.7168	132.36	-6.8583	451.819
-6.8772	73.226	-6.9713	85.0526	-6.7261	134.949	-6.8672	449.814
-6.8856	73.1568	-6.9805	85.2054	-6.7351	134.741	-6.8759	454.049
-6.8945	72.9075	-6.9941	85.2799	-6.7444	134.655	-6.8848	453.89
-6.9038	73.1921	-7.0074	85.6511	-6.7536	134.802	-6.8942	460.232
-6.9131	72.9339	-7.0163	85.4476	-6.763	136.008	-6.9028	461.218
-6.931	73.5109	-7.0253	86.6556	-6.7716	134.46	-6.9121	458.82
-6.9396	73.9024	-7.0343	86.2262	-6.7808	135.706	-6.9214	459.754
-6.9489	73.1469	-7.0435	85.9795	-6.7902	135.193	-6.9393	462.508
-6.9579	73.936	-7.0525	86.4686	-6.7994	135.912	-6.9479	463.707
-6.9669	73.7164	-7.0608	86.9971	-6.8084	137.756	-6.9572	464.147
-6.9762	74.1282	-7.0747	85.9551	-6.8177	136.665	-6.9662	464.796
-6.9851	73.7371	-7.0887	86.1585	-6.836	137.007	-6.9755	465.027
-6.9938	73.8471	-7.0977	86.8902	-6.8449	137.375	-6.9848	466.999
-7.0027	73.1388	-7.1063	86.8011	-6.8542	138.627	-6.9937	467.428
-7.012	73.9074	-7.1154	87.6765	-6.8636	137.7	-7.0023	472.253
-7.0213	74.1658	-7.1243	86.658	-6.8728	138.819	-7.0209	470.631
-7.0389	74.6399	-7.1336	87.203	-6.8818	139.056	-7.0292	470.686
-7.0478	74.6093	-7.1429	88.0626	-6.8909	139.337	-7.0385	473.164
-7.0568	75.1873	-7.1562	87.4992	-6.9001	138.198	-7.0478	473.18
-7.066	75.1646	-7.1694	87.9782	-6.9101	138.756	-7.0571	475.759
-7.0753	74.5768	-7.1787	88.1597	-6.9194	139.353	-7.066	470.732
-7.0846	75.0401	-7.1877	88.5134	-6.9287	139.137	-7.075	479.454
-7.0926	75.1051	-7.1967	88.3027	-6.9423	140.938	-7.0836	479.928
-7.1019	74.7109	-7.2056	89.0958	-6.9559	141.597	-7.1018	480.474
-7.1112	74.7966	-7.2142	88.6547	-6.9653	140.315	-7.1018	480.709
-7.1295	75.3461	-7.2235	89.1638	-6.9742	141.466	-7.1202	484.062
-7.1295	75.2928	-7.2371	88.8384	-6.9835	140.75	-7.1294	484.466
-7.1468	75.4985	-7.2507	88.9745	-6.9928	143.032	-7.1381	485.729
-7.1561	75.7818	-7.2597	88.865	-7.0017	142.225	-7.1474	479.666
-7.1654	76.269	-7.2683	89.5842	-7.0107	142.553	-7.1564	485.741
-7.1743	76.3191	-7.2773	89.4359	-7.02	141.476	-7.1649	484.81
-7.1833	76.3228	-7.2866	89.5541	-7.0293	142.155	-7.1743	485.509
-7.1919	76.4512	-7.2959	89.7086	-7.0386	143.672	-7.1836	485.781
-7.2012	76.7588	-7.3048	90.4427	-7.0519	142.504	-7.2018	491.814
-7.2098	76.7772	-7.3181	89.9778	-7.0658	144.013	-7.2018	490.213
-7.2284	76.6708	-7.3317	90.3797	-7.0751	144.81	-7.2197	490.768
-7.2377	76.2052	-7.3407	90.7499	-7.0851	143.523	-7.2283	491.858
-7.246	76.0331	-7.3501	90.1209	-7.0944	144.904	-7.2376	495.919
-7.2549	76.4329	-7.3587	91.2315	-7.1034	144.667	-7.2469	494.809
-7.2642	77.1858	-7.3673	91.1021	-7.1126	145.262	-7.2558	494.029
-7.2732	77.2001	-7.3766	91.5179	-7.1217	144.474	-7.2648	494.354
-7.2825	77.0714	-7.386	91.4717	-7.131	144.57	-7.2741	496.03
-7.2908	77.4548	-7.3995	91.4953	-7.14	143.975	-7.283	496.258
-7.2998	77.5804	-7.4128	91.3923	-7.1493	145.595	-7.2914	500.071
-7.3184	77.5799	-7.4218	91.1439	-7.1586	146.242	-7.31	498.898
-7.3184	77.4823	-7.4307	91.8157	-7.1679	145.85	-7.3192	501.236
-7.3366	76.9348	-7.4397	91.9263	-7.1812	147.038	-7.3285	501.999
-7.345	77.4745	-7.449	91.7514	-7.1951	147.844	-7.3371	502.315
-7.3543	76.8523	-7.4579	91.9822	-7.2044	147.123	-7.3459	504.015
-7.3632	77.3386	-7.4665	91.9935	-7.2137	147.035	-7.3552	504.522
-7.3726	78.0194	-7.4755	93.3658	-7.2223	147.935	-7.3641	507.13
-7.3815	78.1402	-7.4848	92.7274	-7.2316	147.663	-7.3734	506.394
-7.3905	78.4509	-7.503	92.3957	-7.2409	147.919	-7.382	507.196
-7.3991	78.6511	-7.512	92.6925	-7.2502	148.333	-7.3907	509.835
-7.4084	78.6949	-7.5203	93.2388	-7.2592	148.25	-7.4092	510.436
-7.422	78.7972	-7.5296	92.9604	-7.2685	148.782	-7.4182	512.001
-7.4356	78.6219	-7.5389	93.1747	-7.2774	149.686	-7.4272	513.408
-7.4449	78.5304	-7.5482	93.2181	-7.2911	148.443	-7.4361	516.613
-7.4542	78.975	-7.5565	93.2144	-7.2957	149.178	-7.4451	516.748
-7.4631	78.9399	-7.5658	93.6111	-7.3143	150.548	-7.454	516.722
-7.472	78.7184	-7.5748	93.4095	-7.3236	149.886	-7.4629	515.123
-7.4807	78.4815	-7.5884	94.0966	-7.3326	150.68	-7.4723	518.467
-7.4896	78.7073	-7.6024	93.3959	-7.3422	150.221	-7.4809	518.274
-7.499	79.0405	-7.611	94.7714	-7.3516	150.356	-7.4987	521.48
-7.5079	79.1324	-7.6196	93.979	-7.3609	150.25	-7.508	517.084
-7.5261	79.5184	-7.6289	94.0942	-7.3702	152.685	-7.517	520.383
-7.5348	79.3548	-7.6382	94.5793	-7.3795	150.845	-7.5263	524.328
-7.5438	79.6112	-7.6468	94.0581	-7.3885	151.91	-7.5352	527.921
-7.553	79.8832	-7.6562	95.2088	-7.3974	153.549	-7.5436	527.472
-7.562	80.0574	-7.6698	94.2244	-7.4067	153.084	-7.5528	527.237
-7.5713	79.8798	-7.6737	94.472	-7.425	153.814	-7.5621	528.229
-7.5807	80.3409	-7.6919	95.6469	-7.4343	153.844	-7.5808	532.517
-7.5899	80.0749	-7.7012	95.6015	-7.4436	152.582	-7.5891	530.192
-7.5986	80.0005	-7.7099	95.7003	-7.4526	153.254	-7.598	533.453
-7.6078	80.1031	-7.7188	95.1115	-7.4615	155.582	-7.6073	533.443
-7.6254	80.1524	-7.7278	94.8145	-7.4708	154.95	-7.6163	534.11
-7.6254	79.9997	-7.7367	94.9487	-7.4801	153.591	-7.6252	534.141
-7.6437	79.9979	-7.7461	95.4571	-7.4894	155.353	-7.6342	535.741
-7.653	80.3635	-7.7553	95.8844	-7.4987	154.506	-7.6428	537.512
-7.662	80.4086	-7.7726	95.8494	-7.5074	156.046	-7.6614	536.878
-7.6706	80.5364	-7.7819	95.9023	-7.5166	155.564	-7.6704	540.865
-7.6795	80.7334	-7.7912	96.8874	-7.5306	156.203	-7.6793	543.089
-7.6885	80.9313	-7.8002	96.532	-7.5452	155.074	-7.6883	542.604
-7.6978	81.039	-7.8095	96.9549	-7.5542	155.999	-7.6972	544.359
-7.707	81.8162	-7.8182	96.8605	-7.5635	155.872	-7.7058	544.466
-7.7163	81.2608	-7.8268	96.9926	-7.5725	157.648	-7.7151	544.223
-7.7336	81.4446	-7.8361	96.235	-7.5818	156.359	-7.7244	547.955
-7.7429	81.8793	-7.8543	97.647	-7.5908	156.51	-7.7337	544.013
-7.7519	81.9038	-7.863	97.3479	-7.6001	156.657	-7.7423	549.696
-7.7611	81.9347	-7.8719	97.7305	-7.6094	157.5	-7.7602	547.362
-7.7701	81.8176	-7.8812	98.1826	-7.6187	156.725	-7.7696	551.048
-7.7794	82.474	-7.8899	97.5674	-7.6273	157.731	-7.7785	551.709
-7.7877	82.1941	-7.8991	97.4623	-7.6413	158.57	-7.7874	554.465
-7.797	81.966	-7.9127	97.9216	-7.6552	158.864	-7.7961	554.895
-7.806	82.5346	-7.9174	97.6081	-7.6645	158.868	-7.8051	555.972
-7.815	82.2923	-7.935	98.6243	-7.6735	159.563	-7.8144	558.152
-7.8333	82.0528	-7.9442	98.1127	-7.6824	159.526	-7.8237	558.217
-7.8415	81.8988	-7.9532	98.6911	-7.6917	158.741	-7.8326	558.132
-7.8508	82.4819	-7.9621	98.2513	-7.701	159.494	-7.8462	559.605
-7.8601	82.4568	-7.9711	98.483	-7.71	159.351	-7.8595	560.687
-7.8694	82.5003	-7.9797	99.0884	-7.7193	160.197	-7.8688	560.2
-7.8784	82.4615	-7.989	98.5971	-7.7286	160.632	-7.8774	563.985
-7.8866	82.912	-7.9983	99.0868	-7.7375	160.768	-7.8867	565.288
-7.896	82.5665	-8.0159	99.7079	-7.7512	161.439	-7.896	562.96
-7.9049	82.8542	-8.0249	99.2652	-7.7558	159.767	-7.905	565.396
-7.9142	82.6299	-8.0343	99.1107	-7.7744	159.691	-7.9143	568.065
-7.9235	83.2501	-8.0432	99.5442	-7.7844	162.46	-7.9229	566.591
-7.9407	83.4225	-8.0525	99.9639	-7.7934	161.294	-7.9407	569.444
-7.95	83.176	-8.0615	99.7058	-7.8024	163.27	-7.95	569.312
-7.9593	83.329	-8.0704	99.5047	-7.8117	162.754	-7.9593	572.403
-7.9686	83.5931	-8.0791	100.618	-7.821	164.192	-7.9683	574.081
-7.9772	83.8687	-8.0883	100.819	-7.8303	163.857	-7.9772	571.969
-7.9859	84.0164	-8.1063	101.255	-7.8393	162.905	-7.9862	572.882
-7.9951	84.2297	-8.1152	101.017	-7.8486	163.579	-7.9955	574.032
-8.0041	84.3691	-8.1245	101.056	-7.8575	164.828	-8.0038	581.254
-8.0223	83.5443	-8.1328	100.833	-7.8668	165.489	-8.0131	580.3
-8.0317	83.9315	-8.1421	101.286	-7.8758	164.021	-8.0224	578.281
-8.04	84.4206	-8.1513	101.607	-7.8851	165.589	-8.0407	586.032
-8.049	84.2583	-8.1606	101.19	-7.9037	164.642	-8.05	580.716
-8.0583	84.7349	-8.1693	101.891	-7.9037	163.741	-8.0589	582.145
-8.0673	84.9294	-8.1872	102.016	-7.9216	165.936	-8.0676	582.128
-8.0765	85.0919	-8.1962	100.808	-7.9309	165.836	-8.0765	583.126
-8.0858	85.6983	-8.2055	102.716	-7.9402	165.099	-8.0858	585.843
-8.0937	85.3182	-8.2148	102.751	-7.9491	166.182	-8.0948	590.636
-8.1123	84.9119	-8.2234	102.834	-7.9591	167.487	-8.1037	591.872
-8.1216	85.8765	-8.232	102.268	-7.9684	164.865	-8.113	587.091
-8.1306	85.1602	-8.2413	102.39	-7.9774	167.157	-8.1313	588.645
-8.1389	85.5859	-8.2596	103.797	-7.9867	167.354	-8.1396	589.269
-8.1482	85.6085	-8.2639	102.61	-7.996	168.979	-8.1488	588.882
-8.1571	85.1268	-8.2776	103.031	-8.0049	168.589	-8.1581	595.756
-8.1664	85.7907	-8.2862	104.032	-8.0142	169.286	-8.1674	593.788
-8.1757	85.0307	-8.2955	103.535	-8.0325	169.614	-8.1763	597.332
-8.1847	85.0125	-8.3044	104.294	-8.0325	168.768	-8.1849	598.289
[truncated: 112 more rows]

## Sheet: Fig2c
B (T), point "1"	MRdrag (%), point "1"	B (T), point "2"	MRdrag (%), point "2"	B (T), point "3"	MRdrag (%), point "3"	B (T), point "4"	MRdrag (%), point "4"
[truncated: 1,840 more rows]

[truncated: 7 more sheets: Fig2d, Fig4b, Fig4c, Fig4d, Fig4f, Fig4g, Fig4h]
